# Supplementary material for: Cytotoxic T cells swarm by homotypic chemokine signalling
Source: PubMed Central journal article supplement (PMC7669268; doi:10.7554/elife.56554), 2020-10-13
Supplement: elife-56554-transrepform.pdf [file elife-56554-transrepform.pdf]

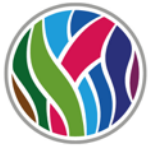

## eLife's transparent reporting form

We encourage authors to provide detailed information *within their submission* to facilitate the interpretation and replication of experiments. Authors can upload supporting documentation to indicate the use of appropriate reporting guidelines for health-related research (see [EQUATOR Network](#)), life science research (see the [BioSharing Information Resource](#)), or the [ARRIVE guidelines](#) for reporting work involving animal research. Where applicable, authors should refer to any relevant reporting standards documents in this form.

If you have any questions, please consult our Journal Policies and/or contact us: [editorial@elifesciences.org](mailto:editorial@elifesciences.org).

### Sample-size estimation

- You should state whether an appropriate sample size was computed when the study was being designed
- You should state the statistical method of sample size computation and any required assumptions
- If no explicit power analysis was used, you should describe how you decided what sample (replicate) size (number) to use

Please outline where this information can be found within the submission (e.g., sections or figure legends), or explain why this information doesn't apply to your submission:

Sample size was determined based on previous experience rather than an explicit power analysis. For T cell migration studies (all formats): we collected data from a minimum of 3 independent experiments to ensure sufficient technical replicates and included all cells measured in the analysis of these experiments, in each case several hundreds or thousands of tracks.

### Replicates

- You should report how often each experiment was performed
- You should include a definition of biological versus technical replication
- The data obtained should be provided and sufficient information should be provided to indicate the number of independent biological and/or technical replicates
- If you encountered any outliers, you should describe how these were handled
- Criteria for exclusion/inclusion of data should be clearly stated
- High-throughput sequence data should be uploaded before submission, with a private link for reviewers provided (these are available from both GEO and ArrayExpress)

Please outline where this information can be found within the submission (e.g., sections or figure legends), or explain why this information doesn't apply to your submission:

T cell migration experiments with central tumoroids (as per Figure 1A) were performed 3 times independently. Imaging data from side tumoroids with straight interface (as per Figure 2A) were collected from 3 fields of view for each condition and for each independent experiment (n=3). Transmigration assays, flow cytometry and RT-PCR experiments were performed at least 3 times independently; the exact n value is reported in each legend. Transcriptomics and secretomics data is available in Supplementary Files 1 and 2.



### Statistical reporting

- Statistical analysis methods should be described and justified
- Raw data should be presented in figures whenever informative to do so (typically when N per group is less than 10)
- For each experiment, you should identify the statistical tests used, exact values of N, definitions of center, methods of multiple test correction, and dispersion and precision measures (e.g., mean, median, SD, SEM, confidence intervals; and, for the major substantive results, a measure of effect size (e.g., Pearson's r, Cohen's d)
- Report exact p-values wherever possible alongside the summary statistics and 95% confidence intervals. These should be reported for all key questions and not only when the p-value is less than 0.05.

Please outline where this information can be found within the submission (e.g., sections or figure legends), or explain why this information doesn't apply to your submission:

The statistical analysis method is specified in each figure legend and the exact p-value is indicated in each graph. For experiments with an n number less than 10, the individual data points are plotted. Box and violin plots were used for data sets with  $n > 100$  events. The extensive statistics for each such numerical figure is reported in the source data files.

(For large datasets, or papers with a very large number of statistical tests, you may upload a single table file with tests, Ns, etc., with reference to sections in the manuscript.)

### Group allocation

- Indicate how samples were allocated into experimental groups (in the case of clinical studies, please specify allocation to treatment method); if randomization was used, please also state if restricted randomization was applied
- Indicate if masking was used during group allocation, data collection and/or data analysis

Please outline where this information can be found within the submission (e.g., sections or figure legends), or explain why this information doesn't apply to your submission:

N/A: defined samples were used rather than allocating samples into experimental groups

### Additional data files ("source data")

- We encourage you to upload relevant additional data files, such as numerical data that are represented as a graph in a figure, or as a summary table
- Where provided, these should be in the most useful format, and they can be uploaded as "Source data" files linked to a main figure or table
- Include model definition files including the full list of parameters used
- Include code used for data analysis (e.g., R, MatLab)
- Avoid stating that data files are "available upon request"

Please indicate the figures or tables for which source data files have been provided:

Source data files have been provided for Figures 1,2,2Supplement1, 3, 4, 4Supplement1, 4Supplement2, 5, 5Supplement1, and 6, namely all figures that contain bar, box or rose plots with more data points than can be represented or distinguished individually. Extensive statistical information is reported in the source data files. Custom code is available at <http://www.matebiro.com/software/motilisim>
