# Supplementary material for: Cytotoxic T cells swarm by homotypic chemokine signalling
Source: eLife. 2020 Oct 13;9:e56554. doi: 10.7554/eLife.56554 (PMC7669268; doi:10.7554/eLife.56554)
Supplement: Figure 1—figure supplement 1—source data 1. [file elife-56554-fig1-figsupp1-data1.xlsx]

## Sheet: Figure 1 Supplement 1 - C
	Cognate beads	Cognate beads (+ CTLs) (embedded CTLs = CCR5KO)
Number of values	353	3084
Minimum	1.781	1.781
25% Percentile	32.11	228.8
Median	73.12	454.7
75% Percentile	132.1	731.1
Maximum	1057	1376
Range	1055	1374
95% CI of median
Actual confidence level	95.70%	95.00%
Lower confidence limit	66.26	438.2
Upper confidence limit	85.5	470
Mean	103.4	493.7
Std. Deviation	118.5	325.9
Std. Error of Mean	6.309	5.868
Lower 95% CI of mean	90.97	482.2
Upper 95% CI of mean	115.8	505.2
Sum	36491	1522467
Statistical test
Mann Whitney U p-val = 2.1053521085362098e-118
