# Supplementary material for: Cytotoxic T cells swarm by homotypic chemokine signalling
Source: eLife. 2020 Oct 13;9:e56554. doi: 10.7554/eLife.56554 (PMC7669268; doi:10.7554/eLife.56554)
Supplement: Figure 1—source data 1. [file elife-56554-fig1-data1.xlsx]

## Sheet: Figure 1 - D
	Cognate	Cognate (+ CTLs pre-embedded)
Number of values	1084	1493
Minimum	1.781	1.781
25% Percentile	58.91	87.28
Median	119.5	211.2
75% Percentile	189.6	445.9
Maximum	897.3	1010
Range	895.5	1008
95% CI of median
Actual confidence level	95.00%	95.00%
Lower confidence limit	113.3	196.1
Upper confidence limit	127.2	226.8
Mean	134.1	289.5
Std. Deviation	99.17	248.8
Std. Error of Mean	3.012	6.44
Lower 95% CI of mean	128.2	276.9
Upper 95% CI of mean	140	302.1
Sum	145386	432228
Statistical analysis
Mann Whitney U test = 3.5 x 10^(-52)
