# Supplementary material for: Cytotoxic T cells swarm by homotypic chemokine signalling
Source: eLife. 2020 Oct 13;9:e56554. doi: 10.7554/eLife.56554 (PMC7669268; doi:10.7554/eLife.56554)
Supplement: Figure 2—figure supplement 1—source data 1. [file elife-56554-fig2-figsupp1-data1.xlsx]

## Sheet: Figure 2 Supplement 1 - B
	Transmigration index							ANOVA summary
	Cognate			Non-cognate				F	113.8
Dilutions	1:1	1:10	1:100	1:1	1:10	1:100		P value	7e-06
Number of values	3	3	3	3	3	3		P value summary	****
Minimum	9.771	8.638	1.952	1.4	1.188	1.012		Significant diff. among means (P < 0.05)?	Yes
25% Percentile	9.771	8.638	1.952	1.4	1.188	1.012		R square	0.9896
Median	9.947	8.736	2.133	1.514	1.267	1.2
75% Percentile	10.38	10.5	2.246	1.524	1.286	1.276		Tukey's multiple comparisons test	Mean Diff.	95.00% CI of diff.	Significant?	Summary	Adjusted P Value
Maximum	10.38	10.5	2.246	1.524	1.286	1.276		Pos supernatant (1:1) vs. Neg supernatant (1:1)	8.612	6.330 to 10.90	Yes	****	4.5e-05	A-B
Range	0.6067	1.858	0.294	0.1238	0.09752	0.2641		Pos supernatant (1:1) vs. Pos supernatant (1:10)	0.5069	-1.776 to 2.789	No	ns	0.937502	A-C
								Pos supernatant (1:1) vs. Neg supernatant (1:10)	8.837	6.554 to 11.12	Yes	****	3.8e-05	A-D
95% CI of median								Pos supernatant (1:1) vs. Pos supernatant (1:100)	8.032	5.750 to 10.31	Yes	****	6.8e-05	A-E
Actual confidence level	75.00%	75.00%	75.00%	75.00%	75.00%	75.00%		Pos supernatant (1:1) vs. Neg supernatant (1:100)	8.93	6.647 to 11.21	Yes	****	3.6e-05	A-F
Lower confidence limit	9.771	8.638	1.952	1.4	1.188	1.012		Neg supernatant (1:1) vs. Pos supernatant (1:10)	-8.106	-10.39 to -5.823	Yes	****	6.4e-05	B-C
Upper confidence limit	10.38	10.5	2.246	1.524	1.286	1.276		Neg supernatant (1:1) vs. Neg supernatant (1:10)	0.2247	-2.058 to 2.507	No	ns	0.998137	B-D
								Neg supernatant (1:1) vs. Pos supernatant (1:100)	-0.5803	-2.863 to 1.702	No	ns	0.898384	B-E
Mean	10.03	9.29	2.11	1.479	1.247	1.163		Neg supernatant (1:1) vs. Neg supernatant (1:100)	0.3176	-1.965 to 2.600	No	ns	0.990904	B-F
Std. Deviation	0.3122	1.046	0.1483	0.06872	0.05177	0.136		Pos supernatant (1:10) vs. Neg supernatant (1:10)	8.33	6.048 to 10.61	Yes	****	5.5e-05	C-D
Std. Error of Mean	0.1802	0.6038	0.08563	0.03968	0.02989	0.0785		Pos supernatant (1:10) vs. Pos supernatant (1:100)	7.525	5.243 to 9.808	Yes	****	9.9e-05	C-E
								Pos supernatant (1:10) vs. Neg supernatant (1:100)	8.423	6.141 to 10.71	Yes	****	5.1e-05	C-F
Lower 95% CI of mean	9.256	6.692	1.742	1.308	1.119	0.8252		Neg supernatant (1:10) vs. Pos supernatant (1:100)	-0.805	-3.088 to 1.478	No	ns	0.726322	D-E
Upper 95% CI of mean	10.81	11.89	2.478	1.65	1.376	1.501		Neg supernatant (1:10) vs. Neg supernatant (1:100)	0.09292	-2.190 to 2.376	No	ns	0.999974	D-F
								Pos supernatant (1:100) vs. Neg supernatant (1:100)	0.8979	-1.385 to 3.181	No	ns	0.643692	E-F
Sum	30.1	27.87	6.33	4.437	3.742	3.489

## Sheet: Figure 2 Supplement 1 - C
	Transmigration index
	Cognate		Non-cognate
	- Collagen	+ Collagen	- Collagen	+ Collagen
Number of values	3	3	3	3		ANOVA summary
Minimum	9.771	6.456	1.24	0.505		F	64.86
25% Percentile	9.771	6.456	1.24	0.505		P value	0.000756
Median	10.38	8.311	1.402	1.363		P value summary	***
75% Percentile	10.6	9.043	1.936	1.372		Significant diff. among means (P < 0.05)?	Yes
Maximum	10.6	9.043	1.936	1.372		R square	0.9799
Range	0.828	2.587	0.696	0.8672
						Tukey's multiple comparisons test	Mean Diff.	95.00% CI of diff.	Significant?	Summary	Adjusted P Value
95% CI of median						Negative supernatant vs. Positive supernatant	-12.32	-16.66 to -7.977	Yes	**	0.001123	A-B
Actual confidence level	75.00%	75.00%	75.00%	75.00%		Negative supernatant vs. Gel / Negative supernatant	0.6545	-3.688 to 4.997	No	ns	0.92267	A-C
Lower confidence limit	9.771	6.456	1.24	0.505		Negative supernatant vs. Gel / Positive supernatant	-6.161	-10.50 to -1.818	Yes	*	0.015205	A-D
Upper confidence limit	10.6	9.043	1.936	1.372		Positive supernatant vs. Gel / Negative supernatant	12.97	8.631 to 17.32	Yes	***	0.000917	B-C
						Positive supernatant vs. Gel / Positive supernatant	6.158	1.815 to 10.50	Yes	*	0.01523	B-D
Mean	10.25	7.937	1.526	1.08		Gel / Negative supernatant vs. Gel / Positive supernatant	-6.816	-11.16 to -2.473	Yes	*	0.010566	C-D
Std. Deviation	0.4287	1.333	0.3642	0.498
Std. Error of Mean	0.2475	0.7698	0.2103	0.2875
Lower 95% CI of mean	9.184	4.624	0.6215	-0.157
Upper 95% CI of mean	11.31	11.25	2.431	2.317
Sum	30.75	23.81	4.579	3.24

## Sheet: Figure 2 Supplement 1 - D
	Cytotoxic Index
	OT1		gBT1			ANOVA summary
	+SFARL	+SFKL	+SFARL	+SFKL		F	213.9
Number of values	4	4	4	4		P value	<0.000001
Minimum	-7.217	60.52	-4.095	55.92		P value summary	****
25% Percentile	-5.564	61.33	-3.652	56.29		Significant diff. among means (P < 0.05)?	Yes
Median	-0.006031	67.24	0.4138	60.98		R square	0.9816
75% Percentile	1.535	72.55	4.754	67.27
Maximum	1.849	73.16	5.288	68.16		Tukey's multiple comparisons test	Mean Diff.	95.00% CI of diff.	Significant?	Summary	Adjusted P Value
Range	9.065	12.64	9.384	12.23		OT1+SFARL vs. OT1+SNFKL	-68.39	-79.13 to -57.64	Yes	****	<0.000001	A-B
						OT1+SFARL vs. gBT1+SNFKL	-1.85	-12.60 to 8.895	No	ns	0.954839	A-C
95% CI of median						OT1+SFARL vs. gBT1+SFARL	-62.86	-73.60 to -52.11	Yes	****	<0.000001	A-D
Actual confidence level	87.50%	87.50%	87.50%	87.50%		OT1+SNFKL vs. gBT1+SNFKL	66.54	55.79 to 77.28	Yes	****	<0.000001	B-C
Lower confidence limit	-7.217	60.52	-4.095	55.92		OT1+SNFKL vs. gBT1+SFARL	5.529	-5.216 to 16.27	No	ns	0.452272	B-D
Upper confidence limit	1.849	73.16	5.288	68.16		gBT1+SNFKL vs. gBT1+SFARL	-61.01	-71.75 to -50.26	Yes	****	<0.000001	C-D
Mean	-1.345	67.04	0.5051	61.51
Std. Deviation	4.041	5.897	4.436	5.833
Std. Error of Mean	2.02	2.948	2.218	2.916
Lower 95% CI of mean	-7.775	57.66	-6.553	52.23
Upper 95% CI of mean	5.084	76.42	7.563	70.79
Sum	-5.38	268.2	2.02	246
