# Supplementary material for: Cytotoxic T cells swarm by homotypic chemokine signalling
Source: eLife. 2020 Oct 13;9:e56554. doi: 10.7554/eLife.56554 (PMC7669268; doi:10.7554/eLife.56554)
Supplement: Figure 2—source data 1. [file elife-56554-fig2-data1.xlsx]

## Sheet: Figure 2 - B
	Forward migration index (FMI) (RIGHT)
	Control	Non-cognate		Cognate
Tumor cells	-	+	+	+	+	+
CTLs	-	-	1 o 1	-	1 to 5	1 to 1
	Empty	EL-4 Only	EL4 + OT1	EL4 (+SIINFEKL) Only	EL4 (+SIINFEKL) + OT1	EL4.SIINFEKL + 1/5th OT1
Number of values	582	610	531	463	534	458
Minimum	-0.9998	-0.9962	-0.9977	-0.9959	-0.9973	-0.9989
25% Percentile	-0.4725	-0.4724	-0.5095	-0.3059	-0.2338	-0.292
Median	-0.04163	0.03513	0.0816	0.1908	0.3444	0.4129
75% Percentile	0.4505	0.5492	0.5487	0.7034	0.7437	0.7609
Maximum	0.9902	0.999	0.9996	0.9995	0.9994	0.9971
Range	1.99	1.995	1.997	1.995	1.997	1.996
95% CI of median
Actual confidence level	95.78%	95.28%	95.42%	95.92%	95.81%	95.56%
Lower confidence limit	-0.1089	-0.02209	-0.02253	0.1341	0.2427	0.308
Upper confidence limit	0.02466	0.1543	0.1735	0.2845	0.4198	0.472
Mean	-0.02083	0.04061	0.04079	0.1565	0.2288	0.2347
Std. Deviation	0.5605	0.6046	0.5943	0.5906	0.5833	0.6047
Std. Error of Mean	0.02323	0.02448	0.02579	0.02745	0.02524	0.02826
Lower 95% CI of mean	-0.06646	-0.007465	-0.009875	0.1026	0.1792	0.1792
Upper 95% CI of mean	0.0248	0.08869	0.09146	0.2105	0.2784	0.2903
Coefficient of variation	2691%	1489%	1457%	377.3%	254.9%	257.6%
Statistical test
	Empty	EL-4 Only	EL4 + OT1	EL4 (+SIINFEKL) Only	EL4 (+SIINFEKL) + OT1 1/5	EL4 (+SIINFEKL) + OT1
Theoretical median	0	0	0	0	0	0
Actual median	-0.04163	0.03513	0.0816	0.1908	0.3444	0.4129
Number of values	582	610	531	463	534	458
Wilcoxon Signed Rank Test
Sum of signed ranks (W)	-8081	14599	11206	31806	60145	43505
Sum of positive ranks	80786	100477	76226	69611	101495	74308
Sum of negative ranks	-88867	-85878	-65020	-37805	-41350	-30803
P value (two tailed)	0.319508	0.093699	0.113225	<0.000001	<0.000001	<0.000001
Exact or estimate?	Approximate	Approximate	Approximate	Approximate	Approximate	Approximate
P value summary	ns	ns	ns	****	****	****
Significant (alpha=0.05)?	No	No	No	Yes	Yes	Yes
How big is the discrepancy?
Discrepancy	-0.04163	0.03513	0.0816	0.1908	0.3444	0.4129
	Average Speed (µm min-1) (LEFT)
	Control	Non-cognate		Cognate
Tumor cells	-	+	+	+	+	+
CTLs	-	-	1 o 1	-	1 to 5	1 to 1
	Empty	EL-4 Only	EL4 + OT1	EL4 (+SIINFEKL) Only	EL4 (+SIINFEKL) + OT1	EL4.SIINFEKL + 1/5th OT1
Number of values	582	610	531	463	534	458
Minimum	0.7351	0.5467	0.825	0.5556	0.9918	0.9776
25% Percentile	3.51	4.587	6.846	6.201	8.395	8.045
Median	5.606	7.243	9.135	9.199	10.83	10.53
75% Percentile	7.817	9.748	11.62	11.2	12.76	12.78
Maximum	17.79	20.93	18.95	17.77	19.02	20.19
Range	17.05	20.38	18.12	17.22	18.03	19.22
95% CI of median
Actual confidence level	95.78%	95.28%	95.42%	95.92%	95.81%	95.56%
Lower confidence limit	5.271	6.806	8.852	8.361	10.43	10.13
Upper confidence limit	5.992	7.563	9.472	9.579	11.06	10.82
Mean	5.892	7.311	9.074	8.719	10.34	10.19
Std. Deviation	3.099	3.689	3.6	3.753	3.566	3.82
Std. Error of Mean	0.1285	0.1494	0.1562	0.1744	0.1543	0.1785
Lower 95% CI of mean	5.64	7.018	8.768	8.376	10.04	9.837
Upper 95% CI of mean	6.144	7.605	9.381	9.061	10.64	10.54
Coefficient of variation	52.59%	50.46%	39.67%	43.05%	34.49%	37.50%
Table Analyzed	Data 6 Ave Speed (added 1:5) 10 Jul 2020
Kruskal-Wallis test
P value	<0.000001
Exact or approximate P value?	Approximate
P value summary	****
Do the medians vary signif. (P < 0.05)?	Yes
Number of groups	6
Kruskal-Wallis statistic	564.1
Data summary
Number of treatments (columns)	6
Number of values (total)	3178
Dunn's multiple comparisons test	Mean rank diff.	Significant?	Summary	Adjusted P Value
Empty vs. EL-4 Only	-335.6	Yes	****	<0.000001
Empty vs. EL4 + OT1	-766.2	Yes	****	<0.000001
Empty vs. EL4 (+SIINFEKL) Only	-685.3	Yes	****	<0.000001
Empty vs. EL4 (+SIINFEKL) + OT1 1/5	-1078	Yes	****	<0.000001
Empty vs. EL4 (+SIINFEKL) + OT1	-1029	Yes	****	<0.000001
EL-4 Only vs. EL4 + OT1	-430.6	Yes	****	<0.000001
EL-4 Only vs. EL4 (+SIINFEKL) Only	-349.6	Yes	****	<0.000001
EL-4 Only vs. EL4 (+SIINFEKL) + OT1 1/5	-742	Yes	****	<0.000001
EL-4 Only vs. EL4 (+SIINFEKL) + OT1	-693.8	Yes	****	<0.000001
EL4 + OT1 vs. EL4 (+SIINFEKL) Only	80.95	No	ns	>0.999999
EL4 + OT1 vs. EL4 (+SIINFEKL) + OT1 1/5	-311.4	Yes	****	<0.000001
EL4 + OT1 vs. EL4 (+SIINFEKL) + OT1	-263.2	Yes	***	0.000103
EL4 (+SIINFEKL) Only vs. EL4 (+SIINFEKL) + OT1 1/5	-392.3	Yes	****	<0.000001
EL4 (+SIINFEKL) Only vs. EL4 (+SIINFEKL) + OT1	-344.1	Yes	****	<0.000001
EL4 (+SIINFEKL) + OT1 1/5 vs. EL4 (+SIINFEKL) + OT1	48.16	No	ns	>0.999999

## Sheet: Figure 2 - C
	Forward migration index (FMI)						Forward migration index (FMI)
	Tumor cells		Beads				Tumor cells		Beads
	Non-cognate	Cognate	Non-cognate	Cognate			Non-cognate	Cognate	Non-cognate	Cognate
							EL-4	EL-4/SIIN+	uncoated beads	Kb-SIIN+ beads
Number of values	703	754	740	701		Theoretical median	0	0	0	0
Minimum	-1	-0.9841	-0.9972	-0.9998		Actual median	-0.01063	0.3057	0.02448	0.2669
25% Percentile	-0.5644	-0.2705	-0.5663	-0.4177		Number of values	703	755	740	700
Median	-0.0297	0.3196	0.01605	0.2566
75% Percentile	0.4869	0.7585	0.5874	0.7222		Wilcoxon Signed Rank Test
Maximum	0.9997	0.9998	0.9995	0.9998		Sum of signed ranks (W)	-10076	106560	9380	71650
Range	2	1.984	1.997	2		Sum of positive ranks	118690	195975	141775	158500
						Sum of negative ranks	-128766	-89415	-132395	-86850
95% CI of median						P value (two tailed)	0.34968	<0.000001	0.420142	<0.000001
Actual confidence level	95.51%	95.11%	95.61%	95.38%		Exact or estimate?	Approximate	Approximate	Approximate	Approximate
Lower confidence limit	-0.1333	0.2261	-0.1339	0.1558		P value summary	ns	****	ns	****
Upper confidence limit	0.0344	0.4122	0.1128	0.3334		Significant (alpha=0.05)?	No	Yes	No	Yes
Mean	-0.0343	0.2142	0.01406	0.1637		How big is the discrepancy?
Std. Deviation	0.6032	0.6015	0.6377	0.6154		Discrepancy	-0.01063	0.3057	0.02448	0.2669
Std. Error of Mean	0.0227501	0.0219053	0.0234423	0.0232433
Lower 95% CI of mean	-0.0788902	0.171266	-0.0318869	0.118143
Upper 95% CI of mean	0.0102902	0.257134	0.0600069	0.209257
Sum	-17.29	92.98	6.41	78.38

## Sheet: Figure 2 - D
	Transmigration index
	Tumor cells (EL4)		Beads
	Cognate (pos)	Non-cognate (neg)	Cognate (pos)	Non-cognate (neg)
Number of values	3	3	3	3
Minimum	3.124	0.8488	3.559	1.013
25% Percentile	3.124	0.8488	3.559	1.013
Median	5.37	1	3.562	1.105
75% Percentile	7.963	1.121	3.906	1.18
Maximum	7.963	1.121	3.906	1.18
Range	4.84	0.2719	0.3467	0.1672
95% CI of median
Actual confidence level	75.00%	75.00%	75.00%	75.00%
Lower confidence limit	3.124	0.8488	3.559	1.013
Upper confidence limit	7.963	1.121	3.906	1.18
Mean	5.486	0.99	3.676	1.099
Std. Deviation	2.422	0.1363	0.1995	0.08374
Std. Error of Mean	1.398	0.07867	0.1152	0.04835
Lower 95% CI of mean	-0.5307	0.6515	3.18	0.891
Upper 95% CI of mean	11.5	1.328	4.171	1.307
Sum	16.46	2.97	11.03	3.297
Column B	Neg EL4
vs.	vs.
Column A	Pos EL4
Unpaired t test
P value	0.047
P value summary	*
Significantly different (P < 0.05)?	Yes
One- or two-tailed P value?	Two-tailed
t, df	t=2.836, df=4
Column D	Neg beads
vs.	vs.
Column C	Pos Beads
Unpaired t test
P value	0.001
P value summary	***
Significantly different (P < 0.05)?	Yes
One- or two-tailed P value?	Two-tailed
t, df	t=8.672, df=4

## Sheet: Figure 2 - E
	Forward migration index (FMI)
	Migrating OT1		Migrating gBT1
Tumoroid	OT1 - SFKL	OT1 + SFKL	gBT1 - SFARL	gBT1 + SFARL
Number of values	569	939	433	805
Minimum	-0.9964	-0.9998	-1	-0.9995
25% Percentile	-0.4742	-0.2185	-0.5144	-0.2568
Median	0.08216	0.3582	0.05	0.3735
75% Percentile	0.5563	0.7815	0.6347	0.758
Maximum	0.9997	0.9997	0.9989	1
Range	1.996	2	1.999	2
95% CI of median
Actual confidence level	95.59%	95.70%	95.66%	95.17%
Lower confidence limit	-0.01427	0.2919	-0.07	0.3014
Upper confidence limit	0.1692	0.4201	0.1505	0.4318
Mean	0.04367	0.2524	0.05157	0.2327
Std. Deviation	0.5956	0.576	0.6256	0.5957
Std. Error of Mean	0.02497	0.0188	0.03007	0.02099
Lower 95% CI of mean	-0.005378	0.2155	-0.007521	0.1915
Upper 95% CI of mean	0.09271	0.2893	0.1107	0.2739
Sum	6.874	172.4	9.438	141
	OT-I + EL-4 / OT-I GFP	OT-I + EL-4/SIIN+ / OT-I GFP	gBT-I + EL-4 / gBT-I Red	gBT-I + EL-4/SFARL+ / gBT-I Red
Theoretical median	0	0	0	0
Actual median	0.08216	0.3582	0.05	0.3735
Number of values	569	939	433	805
Wilcoxon Signed Rank Test
Sum of signed ranks (W)	13453	205048	9033	137689
Sum of positive ranks	87809	323189	51281	231052
Sum of negative ranks	-74356	-118141	-42248	-93363
P value (two tailed)	0.086459	<0.000001	0.081988	<0.000001
Exact or estimate?	Approximate	Approximate	Approximate	Approximate
P value summary	ns	****	ns	****
Significant (alpha=0.05)?	No	Yes	No	Yes
How big is the discrepancy?
Discrepancy	0.08216	0.3582	0.05	0.3735

## Sheet: Figure 2 - F
	Forward migration index (FMI)
	Migrating OT1		Migrating gBT1
Tumoroid	gBT1 + SFARL	gBT1 + SFKL	OT1 + SFARL	OT1 + SFKL
Number of values	610	663	643	690
Minimum	-0.9995	-0.9971	-0.9969	-0.9995
25% Percentile	-0.3145	-0.5174	-0.1598	-0.419
Median	0.3716	0.04437	0.4782	0.1253
75% Percentile	0.7612	0.6108	0.8236	0.6356
Maximum	0.9997	0.9984	1	0.9947
Range	1.999	1.995	1.997	1.994
95% CI of median
Actual confidence level	95.66%	95.78%	95.54%	95.47%
Lower confidence limit	0.2775	-0.03814	0.3872	0.03292
Upper confidence limit	0.4318	0.159	0.5351	0.2157
Mean	0.221	0.03788	0.2929	0.07415
Std. Deviation	0.6014	0.6071	0.6011	0.609
Std. Error of Mean	0.02435	0.0235778	0.0237051	0.0231842
Lower 95% CI of mean	0.173274	-0.00833251	0.246438	0.0287089
Upper 95% CI of mean	0.268726	0.0840925	0.339362	0.119591
Sum	141	19.43	196.5	31.14
	gBT-I + EL-4/SFARL+ / OT-I GFP	gBT-I + EL-4/SIINFEKL+ / OT-I GFP	OT-1 + EL-4 SIINFEKL / gBT-1	OT-1 + EL-4/SFARL+ / gBT-1
Theoretical median	0	0	0	0
Actual median	0.4146	0.0892	0.5373	0.05824
Number of values	610	663	643	690
Wilcoxon Signed Rank Test
Sum of signed ranks (W)	90727	18238	113454	19827
Sum of positive ranks	138541	119177	160250	129111
Sum of negative ranks	-47814	-100939	-46796	-109284
P value (two tailed)	<0.000001	0.064571	<0.000001	0.058416
Exact or estimate?	Approximate	Approximate	Approximate	Approximate
P value summary	****	ns	****	ns
Significant (alpha=0.05)?	Yes	No	Yes	No
How big is the discrepancy?
Discrepancy	0.4146	0.0892	0.5373	0.05824

## Sheet: Figure 2 - G
	Forward migration index (FMI)
	Migrating polyclonal CD8+/CD44+
	Non-cognate	Cognate
Tumoroid:	OT1 - SFKL	OT1 + SFKL
Number of values	671	808
Minimum	-0.9987	-0.9997
25% Percentile	-0.4831	-0.2251
Median	0.05368	0.3631
75% Percentile	0.5647	0.7658
Maximum	1	0.9999
Range	1.999	2
95% CI of median
Actual confidence level	95.54%	95.51%
Lower confidence limit	-0.02715	0.319
Upper confidence limit	0.144	0.4363
Mean	0.03449	0.2451
Std. Deviation	0.6044	0.5934
Std. Error of Mean	0.02333	0.02088
Lower 95% CI of mean	-0.01133	0.2042
Upper 95% CI of mean	0.0803	0.2861
Sum	23.14	198.1
	OT-I + EL-4 / CD8CD44 (3)	OT-I + EL-4/SIIN+ / CD8CD44 (3)
Theoretical median	0	0
Actual median	0.05368	0.3631
Number of values	671	808
Wilcoxon Signed Rank Test
Sum of signed ranks (W)	14824	144674
Sum of positive ranks	120140	235755
Sum of negative ranks	-105316	-91081
P value (two tailed)	0.140089	<0.000001
Exact or estimate?	Approximate	Approximate
P value summary	ns	****
Significant (alpha=0.05)?	No	Yes
How big is the discrepancy?
Discrepancy	0.05368	0.3631
