# Supplementary material for: Cytotoxic T cells swarm by homotypic chemokine signalling
Source: eLife. 2020 Oct 13;9:e56554. doi: 10.7554/eLife.56554 (PMC7669268; doi:10.7554/eLife.56554)
Supplement: Figure 4—figure supplement 1—source data 1. [file elife-56554-fig4-figsupp1-data1.xlsx]

## Sheet: Figure 4 Supplement 1 - D
Transmigration Index
	1 ng/ml			10 ng/ml			100 ng/ml
CCL1	1.1019	1.00616		0.966427	0.725651		0.931365	1.16806
XCL1	1.18886	0.892428		1.07407	0.933066		1.07821	1.05916	0.990394
CCL3	0.936429	1.50117	1.47609		4.27651	6.71113	6.25214	3.79469	4.31792
CCL4	0.981635	0.963882	1.12629	1.05707	1.17847	1.24319	3.70315	3.44058	3.62171
CCL5	1.01247	1.91148	0.550647	1.15086	1.70474	0.590929	5.06836	4.5767	5.96445
CCL9	0.815179	1.15856		1.00116	1.03632		0.76707	1.1247
CXCL10	1.22384		1.71464	1.09537	1.66809	1.12572	1.61276	4.20431	1.12011
CXCL12	0.981361	1.38601	1.11439	2.89075	2.38021	2.11185	5.83499	4.3438	5.41409
Descriptive Statistics
	1 ng/ml			10 ng/ml			100 ng/ml
		95% confidence	95% confidence		95% confidence	95% confidence		95% confidence	95% confidence
	mean	upper limit	lower limit	mean	upper limit	lower limit	mean	upper limit	lower limit
CCL1	1.05403	1.66227	0.44579	0.846039	2.37571	-0.683634	1.04971	2.55345	-0.454028
XCL1	1.04065	2.92393	-0.842634	1.00357	1.89937	0.107767	1.04259	1.15733	0.927837
CCL3	1.30456	2.09715	0.511976	5.49382	20.9612	-9.97359	4.78825	8.00391	1.57259
CCL4	1.02394	1.24524	0.802632	1.15958	1.39429	0.924864	3.58848	3.92236	3.2546
CCL5	1.1582	2.87728	-0.560882	1.14884	2.53228	-0.234597	5.20317	6.95108	3.45527
CCL9	0.986867	3.16837	-1.19464	1.01874	1.24214	0.795337	0.945884	3.21794	-1.32617
CXCL10	1.46924	4.58735	-1.64887	1.29639	2.09691	0.495876	2.31239	6.42825	-1.80347
CXCL12	1.16059	1.67293	0.648251	2.46094	3.44385	1.47803	5.19762	7.10743	3.28782
Statistical test
Two-way ANOVA	Ordinary
Alpha	0.05
Source of Variation	% of total variation	P value	P value summary	Significant?
Interaction	29.9	<0.0001	****	Yes
Row Factor	33.32	<0.0001	****	Yes
Column Factor	21.77	<0.0001	****	Yes
ANOVA table	SS (Type III)	DF	MS	F (DFn, DFd)	P value
Interaction	50.27	14	3.591	F (14, 38) = 8.123	P<0.0001
Row Factor	56.02	7	8.003	F (7, 38) = 18.10	P<0.0001
Column Factor	36.6	2	18.3	F (2, 38) = 41.40	P<0.0001
Residual	16.8	38	0.4421
Tukey's multiple comparisons test
	Mean Diff.	95.00% CI of diff.	Significant?	Summary	Adjusted P Value
CCL1
1 ng/ml vs. 10 ng/ml	0.208	-1.414 to 1.830	No	ns	0.9476
1 ng/ml vs. 100 ng/ml	0.004317	-1.617 to 1.626	No	ns	>0.9999
10 ng/ml vs. 100 ng/ml	-0.2037	-1.825 to 1.418	No	ns	0.9497
XCL1
1 ng/ml vs. 10 ng/ml	0.03708	-1.584 to 1.659	No	ns	0.9983
1 ng/ml vs. 100 ng/ml	-0.00194	-1.482 to 1.478	No	ns	>0.9999
10 ng/ml vs. 100 ng/ml	-0.03902	-1.519 to 1.441	No	ns	0.9977
CCL3
1 ng/ml vs. 10 ng/ml	-4.189	-5.670 to -2.709	Yes	****	<0.0001
1 ng/ml vs. 100 ng/ml	-3.484	-4.808 to -2.160	Yes	****	<0.0001
10 ng/ml vs. 100 ng/ml	0.7056	-0.7747 to 2.186	No	ns	0.4825
CCL4
1 ng/ml vs. 10 ng/ml	-0.1356	-1.460 to 1.188	No	ns	0.9662
1 ng/ml vs. 100 ng/ml	-2.565	-3.889 to -1.241	Yes	****	<0.0001
10 ng/ml vs. 100 ng/ml	-2.429	-3.753 to -1.105	Yes	***	0.0002
CCL5
1 ng/ml vs. 10 ng/ml	0.009356	-1.315 to 1.333	No	ns	0.9998
1 ng/ml vs. 100 ng/ml	-4.045	-5.369 to -2.721	Yes	****	<0.0001
10 ng/ml vs. 100 ng/ml	-4.054	-5.378 to -2.730	Yes	****	<0.0001
CCL9
1 ng/ml vs. 10 ng/ml	-0.03187	-1.653 to 1.590	No	ns	0.9987
1 ng/ml vs. 100 ng/ml	0.04098	-1.581 to 1.663	No	ns	0.9979
10 ng/ml vs. 100 ng/ml	0.07286	-1.549 to 1.694	No	ns	0.9934
CXCL10
1 ng/ml vs. 10 ng/ml	0.1728	-1.307 to 1.653	No	ns	0.9563
1 ng/ml vs. 100 ng/ml	-0.8432	-2.323 to 0.6371	No	ns	0.3566
10 ng/ml vs. 100 ng/ml	-1.016	-2.340 to 0.3080	No	ns	0.1609
CXCL12
1 ng/ml vs. 10 ng/ml	-1.3	-2.624 to 0.02364	No	ns	0.0551
1 ng/ml vs. 100 ng/ml	-4.037	-5.361 to -2.713	Yes	****	<0.0001
10 ng/ml vs. 100 ng/ml	-2.737	-4.061 to -1.413	Yes	****	<0.0001

## Sheet: Figure Supplement 1 - E
Tranmigration Index
	Chemokine only (100 ng/ml)			Chemokine + IgG			Chemokine + blocking Ab
CCL3	3.03129	13.4674	1.37814	4.31792	9.78793	1.83685	0.798591	1.18176	0.709349
CCL4	4.16066	12.69	2.01012	4.44361	11.0125	2.09319	1.54268	3.73118	0.537698
CCL5	1.86902	5.96445		1.71608	6.04236		0.506658	0.544033
CXCL12	5.41409	7.00198		6.17448	6.65464		3.3643	2.36455
Descriptive statistics
	Chemokine only (100 ng/ml)			Chemokine + IgG			Chemokine + blocking Ab
		95% confidence	95% confidence		95% confidence	95% confidence		95% confidence	95% confidence
	mean	upper limit	lower limit	mean	upper limit	lower limit	mean	upper limit	lower limit
CCL3	5.95893	22.242	-10.3242	5.31423	15.4199	-4.79147	0.896565	1.52004	0.273093
CCL4	6.28691	20.3185	-7.74471	5.84978	17.3338	-5.63429	1.93719	5.9935	-2.11912
CCL5	3.91674	29.9354	-22.1019	3.87922	31.3645	-23.606	0.525345	0.76279	0.287901
CXCL12	6.20803	16.296	-3.87998	6.41456	9.46509	3.36403	2.86442	9.21597	-3.48712
Statitical analysis:
Two-way ANOVA	Ordinary
Alpha	0.05
Source of Variation	% of total variation	P value
Interaction	0.6782	0.9998
Row Factor	5.268	0.6992
Tukey's multiple comparisons test
	Mean Diff.	95.00% CI of diff.	Significant?	Summary	Adjusted P Value
CCL3
Chemokine only (100 ng/ml) vs. Chemokine + IgG	0.6447	-7.132 to 8.421	No	ns	0.9757
Chemokine only (100 ng/ml) vs. Chemokine + blocking Ab	5.062	-2.714 to 12.84	No	ns	0.2468
Chemokine + IgG vs. Chemokine + blocking Ab	4.418	-3.359 to 12.19	No	ns	0.3376
CCL4
Chemokine only (100 ng/ml) vs. Chemokine + IgG	0.4371	-7.339 to 8.213	No	ns	0.9887
Chemokine only (100 ng/ml) vs. Chemokine + blocking Ab	4.35	-3.427 to 12.13	No	ns	0.3483
Chemokine + IgG vs. Chemokine + blocking Ab	3.913	-3.864 to 11.69	No	ns	0.4218
CCL5
Chemokine only (100 ng/ml) vs. Chemokine + IgG	0.03752	-9.486 to 9.561	No	ns	>0.9999
Chemokine only (100 ng/ml) vs. Chemokine + blocking Ab	3.391	-6.133 to 12.92	No	ns	0.6418
Chemokine + IgG vs. Chemokine + blocking Ab	3.354	-6.170 to 12.88	No	ns	0.648
CXCL12
Chemokine only (100 ng/ml) vs. Chemokine + IgG	-0.2065	-9.731 to 9.317	No	ns	0.9983
Chemokine only (100 ng/ml) vs. Chemokine + blocking Ab	3.344	-6.180 to 12.87	No	ns	0.6496
Chemokine + IgG vs. Chemokine + blocking Ab	3.55	-5.974 to 13.07	No	ns	0.6159

## Sheet: Figure 4 Supplement 1 - F
	Cognate supernatants
	Untreated	IgG Isotype Control	αXCL1	αCCL1	αCCL1+αCCL3	αCCL3	αCCL3 + αCCL4	αCCL4	αCCL5	αCCL9	αIFN-γ
Number of values	4	4	3	3	3	3	3	3	3	3	3
Minimum	7.721	7.783	8.157	7.547	1.437	2.223	1.74	8.155	8.813	7.294	8.905
25% Percentile	7.956	7.826	8.157	7.547	1.437	2.223	1.74	8.155	8.813	7.294	8.905
Median	9.054	8.162	9.873	8.653	2.632	2.455	2.09	8.303	8.902	8.134	9.527
75% Percentile	10.25	9.328	9.959	9.221	2.904	3.15	2.374	9.546	9.475	8.598	9.763
Maximum	10.52	9.647	9.959	9.221	2.904	3.15	2.374	9.546	9.475	8.598	9.763
Range	2.8	1.864	1.802	1.674	1.466	0.9266	0.6349	1.392	0.6622	1.304	0.8582
95% CI of median
Actual confidence level	87.50%	87.50%	75.00%	75.00%	75.00%	75.00%	75.00%	75.00%	75.00%	75.00%	75.00%
Lower confidence limit	7.721	7.783	8.157	7.547	1.437	2.223	1.74	8.155	8.813	7.294	8.905
Upper confidence limit	10.52	9.647	9.959	9.221	2.904	3.15	2.374	9.546	9.475	8.598	9.763
Mean	9.088	8.439	9.33	8.473	2.325	2.609	2.068	8.668	9.064	8.009	9.399
Std. Deviation	1.188	0.8422	1.017	0.8512	0.7802	0.4821	0.318	0.7644	0.3595	0.661	0.4433
Std. Error of Mean	0.5939	0.4211	0.5869	0.4915	0.4504	0.2783	0.1836	0.4413	0.2075	0.3816	0.256
Lower 95% CI of mean	7.198	7.099	6.805	6.359	0.3865	1.412	1.278	6.769	8.171	6.367	8.297
Upper 95% CI of mean	10.98	9.779	11.86	10.59	4.263	3.807	2.858	10.57	9.957	9.651	10.5
Sum	36.35	33.76	27.99	25.42	6.974	7.828	6.204	26	27.19	24.03	28.2
Statitical tests
ANOVA
F	47.42
P value	<0.000001
P value summary	****
Significant diff. among means (P < 0.05)?	Yes
R square	0.9518
Tukey's multiple comparisons test	Mean Diff.	95.00% CI of diff.	Significant?	Summary	Adjusted P Value
- vs. IgG Isotype Control	0.6488	-1.296 to 2.594	No	ns	0.978648	A-B
- vs. αXCL1	-0.2423	-2.343 to 1.858	No	ns	0.999998	A-C
- vs. αCCL1	0.6142	-1.486 to 2.715	No	ns	0.991729	A-D
- vs. αCCL1+αCCL3	6.763	4.662 to 8.864	Yes	****	<0.000001	A-E
- vs. αCCL3	6.478	4.378 to 8.579	Yes	****	<0.000001	A-F
- vs. αCCL3 + αCCL4	7.019	4.919 to 9.120	Yes	****	<0.000001	A-G
- vs. αCCL4	0.4197	-1.681 to 2.520	No	ns	0.99963	A-H
- vs. αCCL5	0.02398	-2.077 to 2.125	No	ns	>0.999999	A-I
- vs. αCCL9	1.079	-1.022 to 3.179	No	ns	0.758213	A-J
- vs. αIFN-γ	-0.311	-2.412 to 1.790	No	ns	0.999975	A-K
IgG Isotype Control vs. αXCL1	-0.8911	-2.992 to 1.209	No	ns	0.904756	B-C
IgG Isotype Control vs. αCCL1	-0.03461	-2.135 to 2.066	No	ns	>0.999999	B-D
IgG Isotype Control vs. αCCL1+αCCL3	6.114	4.014 to 8.215	Yes	****	<0.000001	B-E
IgG Isotype Control vs. αCCL3	5.829	3.729 to 7.930	Yes	****	<0.000001	B-F
IgG Isotype Control vs. αCCL3 + αCCL4	6.371	4.270 to 8.471	Yes	****	<0.000001	B-G
IgG Isotype Control vs. αCCL4	-0.229	-2.330 to 1.872	No	ns	0.999999	B-H
IgG Isotype Control vs. αCCL5	-0.6248	-2.725 to 1.476	No	ns	0.990601	B-I
IgG Isotype Control vs. αCCL9	0.4297	-1.671 to 2.530	No	ns	0.999546	B-J
IgG Isotype Control vs. αIFN-γ	-0.9598	-3.060 to 1.141	No	ns	0.859098	B-K
αXCL1 vs. αCCL1	0.8565	-1.389 to 3.102	No	ns	0.948828	C-D
αXCL1 vs. αCCL1+αCCL3	7.005	4.760 to 9.251	Yes	****	<0.000001	C-E
αXCL1 vs. αCCL3	6.721	4.475 to 8.966	Yes	****	<0.000001	C-F
αXCL1 vs. αCCL3 + αCCL4	7.262	5.016 to 9.507	Yes	****	<0.000001	C-G
αXCL1 vs. αCCL4	0.6621	-1.584 to 2.908	No	ns	0.991197	C-H
αXCL1 vs. αCCL5	0.2663	-1.979 to 2.512	No	ns	0.999997	C-I
αXCL1 vs. αCCL9	1.321	-0.9248 to 3.567	No	ns	0.597784	C-J
αXCL1 vs. αIFN-γ	-0.06871	-2.314 to 2.177	No	ns	>0.999999	C-K
αCCL1 vs. αCCL1+αCCL3	6.149	3.903 to 8.394	Yes	****	<0.000001	D-E
αCCL1 vs. αCCL3	5.864	3.618 to 8.110	Yes	****	<0.000001	D-F
αCCL1 vs. αCCL3 + αCCL4	6.405	4.160 to 8.651	Yes	****	<0.000001	D-G
αCCL1 vs. αCCL4	-0.1944	-2.440 to 2.051	No	ns	>0.999999	D-H
αCCL1 vs. αCCL5	-0.5902	-2.836 to 1.655	No	ns	0.99636	D-I
αCCL1 vs. αCCL9	0.4643	-1.781 to 2.710	No	ns	0.999502	D-J
αCCL1 vs. αIFN-γ	-0.9252	-3.171 to 1.320	No	ns	0.919144	D-K
αCCL1+αCCL3 vs. αCCL3	-0.2847	-2.530 to 1.961	No	ns	0.999994	E-F
αCCL1+αCCL3 vs. αCCL3 + αCCL4	0.2565	-1.989 to 2.502	No	ns	0.999998	E-G
αCCL1+αCCL3 vs. αCCL4	-6.343	-8.589 to -4.098	Yes	****	<0.000001	E-H
αCCL1+αCCL3 vs. αCCL5	-6.739	-8.985 to -4.493	Yes	****	<0.000001	E-I
αCCL1+αCCL3 vs. αCCL9	-5.684	-7.930 to -3.439	Yes	****	<0.000001	E-J
αCCL1+αCCL3 vs. αIFN-γ	-7.074	-9.320 to -4.828	Yes	****	<0.000001	E-K
αCCL3 vs. αCCL3 + αCCL4	0.5412	-1.704 to 2.787	No	ns	0.998189	F-G
αCCL3 vs. αCCL4	-6.059	-8.304 to -3.813	Yes	****	<0.000001	F-H
αCCL3 vs. αCCL5	-6.454	-8.700 to -4.209	Yes	****	<0.000001	F-I
αCCL3 vs. αCCL9	-5.4	-7.645 to -3.154	Yes	****	<0.000001	F-J
αCCL3 vs. αIFN-γ	-6.789	-9.035 to -4.544	Yes	****	<0.000001	F-K
αCCL3 + αCCL4 vs. αCCL4	-6.6	-8.845 to -4.354	Yes	****	<0.000001	G-H
αCCL3 + αCCL4 vs. αCCL5	-6.996	-9.241 to -4.750	Yes	****	<0.000001	G-I
αCCL3 + αCCL4 vs. αCCL9	-5.941	-8.187 to -3.695	Yes	****	<0.000001	G-J
αCCL3 + αCCL4 vs. αIFN-γ	-7.331	-9.576 to -5.085	Yes	****	<0.000001	G-K
αCCL4 vs. αCCL5	-0.3958	-2.641 to 1.850	No	ns	0.999878	H-I
αCCL4 vs. αCCL9	0.6588	-1.587 to 2.904	No	ns	0.99152	H-J
αCCL4 vs. αIFN-γ	-0.7308	-2.976 to 1.515	No	ns	0.982027	H-K
αCCL5 vs. αCCL9	1.055	-1.191 to 3.300	No	ns	0.838737	I-J
αCCL5 vs. αIFN-γ	-0.335	-2.581 to 1.911	No	ns	0.999973	I-K
αCCL9 vs. αIFN-γ	-1.39	-3.635 to 0.8561	No	ns	0.529807	J-K

## Sheet: Figure 4 Supplement 1 - G
	Forward migration index (FMI)
	Non-cognate	Cognate
	Untreated		IgG Control	αCCL3	αCCL4	αCCL3+αCCL4
Number of values	1258	1398	1203	1265	847	1321
Minimum	-0.9998	-0.9997	-0.9996	-0.9989	-0.9999	-0.9998
25% Percentile	-0.5156	-0.2865	-0.3488	-0.3388	-0.3711	-0.5658
Median	0.04531	0.2953	0.3141	0.2815	0.2036	0.05588
75% Percentile	0.6145	0.7547	0.7547	0.721	0.7289	0.6084
Maximum	0.9999	1	1	0.9998	1	1
Range	2	2	2	1.999	2	2
95% CI of median
Actual confidence level	95.00%	95.00%	95.00%	95.00%	95.38%	95.21%
Lower confidence limit	-0.01648	0.2307	0.2509	0.2139	0.12	-0.01913
Upper confidence limit	0.1129	0.3532	0.3795	0.3395	0.2888	0.111
Mean	0.03743	0.2	0.1876	0.171	0.1399	0.02034
Std. Deviation	0.625	0.5964	0.6171	0.6037	0.6185	0.6346
Std. Error of Mean	0.0176214	0.0159509	0.0177919	0.0169737	0.0212519	0.0174602
Lower 95% CI of mean	0.00289211	0.168736	0.152728	0.137732	0.0982463	-0.0138819
Upper 95% CI of mean	0.0719679	0.231264	0.222472	0.204268	0.181554	0.0545619
Sum	47.09	279.6	225.7	216.3	74.56	18.1
	Non-cognate	Non-cognate	Non-cognate	cognate	cognate	cognate	IgG	IgG	IgG	αCCL3	αCCL3	αCCL3	αCCL4	αCCL4	αCCL4	αCCL3 + αCCL4	αCCL3 + αCCL4	αCCL3 + αCCL4
Theoretical median	0	0	0	0	0	0	0	0	0	0	0	0	0	0	0	0	0	0
Actual median	0.01954	0.07703	0.04548	0.2982	0.2099	0.3268	0.3107	0.2765	0.3887	0.3469	0.3037	0.1651	0.2036	0.3231	0.2805	0.0691	-0.02534	0.06656
Number of values	611	370	277	583	308	507	487	414	302	384	485	396	533	157	157	639	251	431
Wilcoxon Signed Rank Test
Sum of signed ranks (W)	12930	4835	2395	60770	11892	58726	40218	28489	15025	30510	39107	15302	36217	4247	4331	9972	78	8044
Sum of positive ranks	99948	36735	20449	115503	29739	93752	79523	57197	30389	52215	78481	46954	89264	8325	8367	107226	15852	50570
Sum of negative ranks	-87018	-31900	-18054	-54733	-17847	-35026	-39305	-28708	-15364	-21705	-39374	-31652	-53047	-4078	-4036	-97254	-15774	-42526
P value (two tailed)	0.1386	0.2404	0.3697	<0.0001	0.0001	<0.0001	<0.0001	<0.0001	<0.0001	<0.0001	<0.0001	0.0008	<0.0001	0.0002	0.0001	0.2856	0.9733	0.1201
Exact or estimate?	Approximate	Approximate	Approximate	Approximate	Approximate	Approximate	Approximate	Approximate	Approximate	Approximate	Approximate	Approximate	Approximate	Exact	Exact	Approximate	Approximate	Approximate
P value summary	ns	ns	ns	****	***	****	****	****	****	****	****	***	****	***	***	ns	ns	ns
Significant (alpha=0.05)?	No	No	No	Yes	Yes	Yes	Yes	Yes	Yes	Yes	Yes	Yes	Yes	Yes	Yes	No	No	No
How big is the discrepancy?
Discrepancy	0.01954	0.07703	0.04548	0.2982	0.2099	0.3268	0.3107	0.2765	0.3887	0.3469	0.3037	0.1651	0.2036	0.3231	0.2805	0.0691	-0.02534	0.06656

## Sheet: Figure 4 Supplement1 - H
	Cumulative concentration (pg/ml)
	Time(h)	CCL3		CCL4
	0	7507.33	7043.78	2462.43	2641.38
	2	8347.58	9841.1	3431.86	2902.33
	4	12368.2	11454.4	3997.28	4311.44
	8	13497.6	12393	4326.22	4707.23
	16	16719.6	12090.4	4220.17	5836.44
	24	13212.4	14193.1	4957.1	4607.29
	48	13669	17127.9	5985.66	4767.3
	72	15119	17699	6185.79	5275.48
Descriptive statitistics
	CCL3			CCL4
		95% confidence	95% confidence		95% confidence	95% confidence
Time (h)	mean	upper limit	lower limit	mean	upper limit	lower limit
0	7275.56	10220.5	4330.6	2551.91	3688.84	1414.97
2	9094.34	18582.8	-394.147	3167.09	6531.25	-197.067
4	11911.3	17716.7	6105.97	4154.36	6150.2	2158.52
8	12945.3	19962.8	5927.81	4516.73	6937.37	2096.08
16	14405	43814.6	-15004.6	5028.31	15296.7	-5240.05
24	13702.8	19933.4	7472.09	4782.19	7004.6	2559.79
48	15398.5	37373.8	-6576.9	5376.48	13116.9	-2363.92
72	16409	32800.1	17.8365	5730.63	11513.9	-52.6802

## Sheet: Figure 4 Supplement 1 - I
	Forward migration index (FMI)
Tumoroid: CTLs srted from:	Non-cognate	Cognate
Number of values	765	652
Minimum	-0.9998	-0.994
25% Percentile	-0.5399	-0.2735
Median	0.007035	0.316
75% Percentile	0.5589	0.7484
Maximum	0.9997	0.9998
Range	1.999	1.994
95% CI of median
Actual confidence level	95.72%	95.43%
Lower confidence limit	-0.06217	0.2106
Upper confidence limit	0.08671	0.3849
Mean	0.006626	0.2074
Std. Deviation	0.6261	0.5947
Std. Error of Mean	0.02264	0.02329
Lower 95% CI of mean	-0.03781	0.1616
Upper 95% CI of mean	0.05106	0.2531
Sum	5.069	135.2
Statistical test:	Resting	Activated
Theoretical median	0	0
Actual median	0.007035	0.316
Number of values	765	652
Wilcoxon Signed Rank Test
Sum of signed ranks (W)	3727	80770
Sum of positive ranks	148361	146824
Sum of negative ranks	-144634	-66054
P value (two tailed)	0.760588	<0.000001
Exact or estimate?	Approximate	Approximate
P value summary	ns	****
Significant (alpha=0.05)?	No	Yes
How big is the discrepancy?
Discrepancy	0.007035	0.316
