# Supplementary material for: Cytotoxic T cells swarm by homotypic chemokine signalling
Source: eLife. 2020 Oct 13;9:e56554. doi: 10.7554/eLife.56554 (PMC7669268; doi:10.7554/eLife.56554)
Supplement: Figure 4—figure supplement 3—source data 1. [file elife-56554-fig4-figsupp3-data1.xlsx]

## Sheet: Figure 4 - Supplement 3 - B
	CCL3							CCL4
	WT noncognate	WT Cognate	WT bulk	CCL3/4-secreting				WT noncognate	WT Cognate	WT bulk	CCL3/4-secreting
Number of values	3	3	3	3			Number of values	3	3	3	3
Minimum	233.6	1816	185.8	1220			Minimum	342.4	719.8	343.9	1250
25% Percentile	233.6	1816	185.8	1220			25% Percentile	342.4	719.8	343.9	1250
Median	247.7	1967	249.3	1769			Median	344.2	961.7	344.9	1330
75% Percentile	249.9	2541	253.8	1944			75% Percentile	349.4	1023	346.8	1398
Maximum	249.9	2541	253.8	1944			Maximum	349.4	1023	346.8	1398
Range	16.34	725.3	68.02	724.7			Range	7.048	303.2	2.833	147.8
95% CI of median							95% CI of median
Actual confidence level	75.00%	75.00%	75.00%	75.00%			Actual confidence level	75.00%	75.00%	75.00%	75.00%
Lower confidence limit	233.6	1816	185.8	1220			Lower confidence limit	342.4	719.8	343.9	1250
Upper confidence limit	249.9	2541	253.8	1944			Upper confidence limit	349.4	1023	346.8	1398
Mean	243.7	2108	229.6	1644			Mean	345.3	901.5	345.2	1326
Std. Deviation	8.864	382.6	38.01	378.1			Std. Deviation	3.654	160.3	1.444	73.97
Std. Error of Mean	5.118	220.9	21.95	218.3			Std. Error of Mean	2.11	92.57	0.8334	42.71
Lower 95% CI of mean	221.7	1158	135.2	705.3			Lower 95% CI of mean	336.2	503.2	341.6	1142
Upper 95% CI of mean	265.7	3059	324.1	2584			Upper 95% CI of mean	354.4	1300	348.8	1510

## Sheet: Figure 4 Supplement 3 - E
	Non-cognate	Cognate
	EL4.CCL3+CCL4+	EL4.CCL3+CCL4+ + SNFKL
Number of values	1729	2202
Minimum	1.781	1.781
25% Percentile	166.9	97.19
Median	298.5	199.8
75% Percentile	475.2	304.6
Maximum	1028	1064
Range	1026	1062
95% CI of median
Actual confidence level	95.00%	95.00%
Lower confidence limit	287.2	189.9
Upper confidence limit	315	208.7
Mean	338.7	213.3
Std. Deviation	224.1	145.2
Std. Error of Mean	5.39	3.094
Lower 95% CI of mean	328.1	207.2
Upper 95% CI of mean	349.3	219.3
Sum	585608	469581
Statistical test
Mann Whitney U p-val = 1.767211560069139e-70

## Sheet: Figure 4 Supplement 3 - H
	Noncognate	Cognate
	EL4.CCL3+	EL4.CCL3+ + SNFKL
Number of values	1088	833
Minimum	1.781	1.781
25% Percentile	196.9	80.63
Median	329.5	163.9
75% Percentile	481	245.9
Maximum	846	523.2
Range	844.2	521.5
95% CI of median
Actual confidence level	95.00%	95.56%
Lower confidence limit	312.2	149.7
Upper confidence limit	346.6	173.5
Mean	344.4	170.9
Std. Deviation	188.7	107.3
Std. Error of Mean	5.72	3.717
Lower 95% CI of mean	333.2	163.6
Upper 95% CI of mean	355.6	178.2
Sum	374691	142394
Statistical test
Mann Whitney U p-val = 1.767211560069139e-70

## Sheet: Figure 4 Supplement 3 - K
	Noncognate	Cognate
	EL4.CCL4	EL4.CCL4+ + SNFKL
	miRFP	miRFP-SIINFEKL
Number of values	2748	5681
Minimum	1.781	1.781
25% Percentile	151.6	81.93
Median	297.4	152.2
75% Percentile	539.4	234.4
Maximum	1439	1452
Range	1437	1450
95% CI of median
Actual confidence level	95.00%	95.00%
Lower confidence limit	284.1	147.8
Upper confidence limit	313.6	155.8
Mean	380.1	168.9
Std. Deviation	297.3	118
Std. Error of Mean	5.671	1.566
Lower 95% CI of mean	369	165.8
Upper 95% CI of mean	391.2	172
Sum	1044519	959515
Statistical test
Mann Whitney U p-val = 6.84078117570112e-248
