# Supplementary material for: Cytotoxic T cells swarm by homotypic chemokine signalling
Source: eLife. 2020 Oct 13;9:e56554. doi: 10.7554/eLife.56554 (PMC7669268; doi:10.7554/eLife.56554)
Supplement: Figure 4—figure supplement 4—source data 1. [file elife-56554-fig4-figsupp4-data1.xlsx]

## Sheet: Fig 4 - Suppl - 4A
	Absolute no. of OT1 cells
	wildtytpe tumour	CCL3/4-secreting tumour
	5722	1562
	9317	5023
	51009	230206
	110636	265349
	135468	101282
	99748	397175
	3906	17352
	3585	59506
	956	4131
	1776	8574
	wildtytpe tumour	CCL3/4-secreting tumour
Number of values	10	10
Minimum	956	1562
Maximum	135468	397175
Range	134512	395613
Mean	42212	109016
Std. Deviation	53204	140050
Std. Error of Mean	16825	44288
Lower 95% CI of mean	4152	8830
Upper 95% CI of mean	80272	209202
Geometric mean	12547	30537
Geometric SD factor	6.35	7.236
	wildtytpe tumour	CCL3/4-secreting tumour		Table Analyzed	OT1.WT# (pooled all 10 mice)
Test for normal distribution
D'Agostino & Pearson test				Column B	CCL3/4-secreting tumour
K2	2.433	3.353		vs.	vs.
P value	0.2962	0.187		Column A	wildtytpe tumour
Passed normality test (alpha=0.05)?	Yes	Yes
P value summary	ns	ns		Paired t test
				P value	0.0408
				P value summary	*
Number of values	10	10		Significantly different (P < 0.05)?	Yes

## Sheet: Fig 4 - Suppl 4B
Tumour infiltrating cells
Absolute Counts	mCherry tumour					CCL3/4-secreting tumour
#CD45.1+ (leukocytes)	720953	441694	946864	382469	367535	740270	452515	1938332	295598	965620
#CD11b+ (myeloid cells)	636883	387998	797034	331595	303797	579357	362209	1675971	195363	798633
#Ly6G+ (neutrophils)_	408280	225682	187151	81787	129728	108178	144473	258663	13682	67581
#CD64+ (TAMs)	81436	57235	242101	96810	59566	192722	81187	556747	87685	236341
#Ly6Chi (monocytes)	81241	63928	227896	80310	64022	95580	85338	641865	40579	316519
#NK1.1+ (NK cells)	6875	8722	18924	6914	3827	53111	29017	85049	32730	56059
Descriptive statistics
	mcherry tumour			CCL3/4-secreting tumour
		95% confidence	95% confidence		95% confidence	95% confidence
	mean	upper limit	lower limit	mean	upper limit	lower limit
#CD45.1+ (leukocytes)	571903	886890	256916	878467	1.68104e+06	75892
#CD11b+ (myeloid cells)	491461	759213	223709	722307	1.4418e+06	2817.24
#Ly6G+ (neutrophils)_	206526	362235	50815.8	118515	233002	4028.92
#CD64+ (TAMs)	107430	203077	11782.7	230936	471854	-9981.57
#Ly6Chi (monocytes)	103479	190467	16491.9	235976	547518	-75565.1
#NK1.1+ (NK cells)	9052.4	16243.8	1861.02	51193.2	79000.9	23385.5
Statistical analysis: Multiple t tests with Holm-Sidak's post test
	Significant?	P value	Mean of mCherry tumour	Mean of CCL3/4-secreting tumour	Difference	SE of difference	t ratio	df	Adjusted P Value
#CD45.1+	No	0.352447	571903	878467	-306564	310532	0.9872	8	0.778975
#CD11b+	No	0.428015	491461	722307	-230845	276503	0.8349	8	0.778975
#Ly6G+	No	0.241701	206526	118515	88010	69610	1.264	8	0.778975
#CD64+	No	0.222429	107430	230936	-123507	93360	1.323	8	0.778975
#Ly6Chi	No	0.288325	103479	235976	-132497	116501	1.137	8	0.778975
#NK1.1+	Yes	0.003566	9052	51193	-42141	10345	4.074	8	0.035094

## Sheet: Fig 4 - Suppl 4C
Tumour infiltrating cells data:
Absolute Counts	mCherry tumour			CCL3/4-secreting tumour
Leukocytes	765085	1.71569e+06	1.42295e+06	1.51734e+06	2.27532e+06	538540
Myeloid cells	621575	1.55671e+06	1252395	1.09012e+06	1.70743e+06	355533
Dendritic cells	20320	32505.1	29120.6	28223	37086.1	5699.79
CD8+ T cells	66130.8	44734.8	52242.1	183497	232156	63473.3
Descriptive statistics
	mCherry tumour			CCL3/4-secreting tumour
		95% confidence	95% confidence		95% confidence	95% confidence
	mean	upper limit	lower limit	mean	upper limit	lower limit
Leukocytes	1.30124e+06	2.51064e+06	91841.3	1.44373e+06	3.60674e+06	-719273
Myeloid cells	1.14356e+06	2.32842e+06	-41302.7	1.05103e+06	2.73228e+06	-630225
Dendritic cells	27315.3	42940.4	11690.1	23669.6	63865.4	-16526.2
CD8+ T cells	54369.2	81335.7	27402.8	159708	375383	-55966.1
Statistical analysis: Multiple t tests with Holm-Sidak's post test
	Significant?	P value	Mean of mCherry tumour	Mean of CCL3/4-secreting tumour	Difference	SE of difference	t ratio	df	Adjusted P Value
Leukocytes	No	0.816781	1301243	1443733	-142490	575960	0.2474	4	0.981279
Myeloid cells	No	0.855951	1143558	1051029	92529	478035	0.1936	4	0.981279
Dendritic cells	No	0.734474	27315	23670	3646	10023	0.3637	4	0.981279
CD8+ T cells	No	0.105395	54369	159708	-105339	50516	2.085	4	0.35949
Dendritic cells as a % of CD11b myeloid cells
	mCherry tumour	CCL3/4-secreting tumour
Number of values	3	3
Minimum	1.4	1.8
25% Percentile	1.4	1.8
Median	2.8	3.4
75% Percentile	3.2	4.7
Maximum	3.2	4.7
Range	1.8	2.9
95% CI of median
Actual confidence level	75.00%	75.00%
Lower confidence limit	1.4	1.8
Upper confidence limit	3.2	4.7
Mean	2.467	3.3
Std. Deviation	0.9452	1.453
Std. Error of Mean	0.5457	0.8386
Lower 95% CI of mean	0.1188	-0.3084
Upper 95% CI of mean	4.815	6.908
Paired t test
P value	0.4639
P value summary	ns
Significantly different (P < 0.05)?	No
