# Supplementary material for: Cytotoxic T cells swarm by homotypic chemokine signalling
Source: eLife. 2020 Oct 13;9:e56554. doi: 10.7554/eLife.56554 (PMC7669268; doi:10.7554/eLife.56554)
Supplement: Figure 4—source data 1. [file elife-56554-fig4-data1.xlsx]

## Sheet: Figure 4 - A
	Forward migration index (FMI)
	Non-cognate			Cognate				Statistical Tests
	Untreated	m-PTX 100ng/ml	PTX 100ng/ml	Untreated	m-PTX 100ng/ml	PTX 100ng/ml			EL-4 + OT-I / -	EL-4 + OT-I / mutPTX	EL-4 + OT-I / PTX	EL-4/SIIN+ + OT-I / -	EL-4/SIIN+ + OT-I / mutPTX	EL-4/SIIN+ + OT-I / PTX
								Theoretical median	0	0	0	0	0	0
Number of values	828	926	1071	1122	992	1021		Actual median	-0.04144	0.05825	0.05372	0.3354	0.3152	0.04189
Minimum	-0.9998	-0.9991	-0.9996	-0.9988	-0.9983	-0.9994		Number of values	564	410	468	637	493	706
25% Percentile	-0.5517	-0.4972	-0.5017	-0.2718	-0.3327	-0.5433
Median	-0.04144	0.05825	0.05372	0.3354	0.3152	0.04189		Wilcoxon Signed Rank Test
75% Percentile	0.4599	0.5781	0.6202	0.7885	0.7341	0.5554		Sum of signed ranks (W)	-11810	6941	7964	84737	40785	8601
Maximum	0.999	0.9984	0.9982	0.9997	0.9999	0.9998		Sum of positive ranks	73760	45598	58855	143970	81278	129086
Range	1.999	1.998	1.998	1.999	1.998	1.999		Sum of negative ranks	-85570	-38657	-50891	-59233	-40493	-120485
								P value (two tailed)	0.127252	0.14838	0.173796	<0.000001	<0.000001	0.427653
95% CI of median								Exact or estimate?	Approximate	Approximate	Approximate	Approximate	Approximate	Approximate
Actual confidence level	95.23%	95.72%	95.33%	95.25%	95.26%	95.40%		P value summary	ns	ns	ns	****	****	ns
Lower confidence limit	-0.1286	-0.04867	-0.04314	0.2508	0.1592	-0.05206		Significant (alpha=0.05)?	No	No	No	Yes	Yes	No
Upper confidence limit	0.04061	0.1738	0.1619	0.4284	0.4255	0.1032
								How big is the discrepancy?
Mean	-0.03824	0.04267	0.04016	0.229	0.1849	0.01809		Discrepancy	-0.04144	0.05825	0.05372	0.3354	0.3152	0.04189
Std. Deviation	0.5977	0.6039	0.6306	0.5952	0.6176	0.6076
Std. Error of Mean	0.0207715	0.0198454	0.019269	0.0177691	0.0196088	0.0190154
Lower 95% CI of mean	0.872704	0.616552	0.635976	0.112836	0.11862	0.751728
Upper 95% CI of mean	1.0319	1.29785	1.27062	1.79216	1.78658	1.15627
Sum	-21.57	17.49	18.8	145.9	91.17	12.77
	Average Speed (µm min-1)
	Non-cognate			Cognate
	Untreated	m-PTX 100ng/ml	PTX 100ng/ml	Untreated	m-PTX 100ng/ml	PTX 100ng/ml		Kruskal-Wallis test
								P value	<0.000001
Number of values	828	926	1071	1122	992	1021		Exact or approximate P value?	Approximate
Minimum	0.717	0.7941	0.5029	0.6984	0.6963	0.7278		P value summary	****
25% Percentile	5.403	4.498	4.434	7.818	6.958	4.597		Do the medians vary signif. (P < 0.05)?	Yes
Median	7.271	6.681	6.499	9.993	9.284	6.404		Number of groups	6
75% Percentile	8.836	9.008	8.419	12.09	11.6	8.425		Kruskal-Wallis statistic	868.9
Maximum	18.34	17.45	15.74	19.02	19.62	16.5
Range	17.62	16.66	15.24	18.32	18.93	15.77		Data summary
								Number of treatments (columns)	6
95% CI of median								Number of values (total)	6260
Actual confidence level	95.23%	95.72%	95.33%	95.32%	95.26%	95.40%
Lower confidence limit	7.077	6.501	6.17	9.577	8.819	6.151		Dunn's multiple comparisons test	Mean rank diff.	Significant?	Summary	Adjusted P Value
Upper confidence limit	7.554	7.241	6.722	10.41	9.615	6.677		EL-4 + OT-I / - vs. EL-4 + OT-I / mutPTX	374	Yes	***	0.000227	A-B
								EL-4 + OT-I / - vs. EL-4 + OT-I / PTX	536.6	Yes	****	<0.000001	A-C
Mean	7.201	6.577	6.483	9.724	9.04	6.644		EL-4 + OT-I / - vs. EL-4/SIIN+ + OT-I / -	-1247	Yes	****	<0.000001	A-D
Std. Deviation	2.784	3.339	2.943	3.475	3.867	2.794		EL-4 + OT-I / - vs. EL-4/SIIN+ + OT-I / mutPTX	-993.2	Yes	****	<0.000001	A-E
Std. Error of Mean	0.0967507	0.109726	0.0899281	0.103743	0.122777	0.0874407		EL-4 + OT-I / - vs. EL-4/SIIN+ + OT-I / PTX	30.16	No	ns	>0.999999	A-F
								EL-4 + OT-I / mutPTX vs. EL-4 + OT-I / PTX	162.6	No	ns	0.673841	B-C
Lower 95% CI of mean	7.01137	6.76194	6.30674	9.52066	8.79936	6.47262		EL-4 + OT-I / mutPTX vs. EL-4/SIIN+ + OT-I / -	-1621	Yes	****	<0.000001	B-D
Upper 95% CI of mean	7.39063	7.19206	6.65926	9.92734	9.28064	6.81538		EL-4 + OT-I / mutPTX vs. EL-4/SIIN+ + OT-I / mutPTX	-1367	Yes	****	<0.000001	B-E
								EL-4 + OT-I / mutPTX vs. EL-4/SIIN+ + OT-I / PTX	-343.9	Yes	***	0.000135	B-F
Sum	4061	2860	3034	6755	5657	3691		EL-4 + OT-I / PTX vs. EL-4/SIIN+ + OT-I / -	-1783	Yes	****	<0.000001	C-D
								EL-4 + OT-I / PTX vs. EL-4/SIIN+ + OT-I / mutPTX	-1530	Yes	****	<0.000001	C-E
								EL-4 + OT-I / PTX vs. EL-4/SIIN+ + OT-I / PTX	-506.5	Yes	****	<0.000001	C-F
								EL-4/SIIN+ + OT-I / - vs. EL-4/SIIN+ + OT-I / mutPTX	253.5	Yes	*	0.019336	D-E
								EL-4/SIIN+ + OT-I / - vs. EL-4/SIIN+ + OT-I / PTX	1277	Yes	****	<0.000001	D-F
								EL-4/SIIN+ + OT-I / mutPTX vs. EL-4/SIIN+ + OT-I / PTX	1023	Yes	****	<0.000001	E-F

## Sheet: Figure 4 - D
	Forward migration index (FMI)
	Non-cognate			Cognate			Non-cognate			Cognate
Tmouroid	Controi	CCL3/4-secreting	CTLs + Tumour cells				Controi	CCL3/4-secreting	CTLs + Tumour cells
Number of values	937	1112	913	915			WT	EL-4 CCL3-CCL4	Neg	Pos
Minimum	-0.9998	-0.9998	-0.9998	-0.992		Theoretical median	0	0	0	0
25% Percentile	-0.5633	-0.3318	-0.5107	-0.1449		Actual median	0.0001708	0.2593	0.0529	0.4571
Median	0.0001708	0.2593	0.0529	0.4571		Number of values	937	1112	913	915
75% Percentile	0.4729	0.7018	0.5465	0.7944
Maximum	0.9999	0.9998	0.9993	0.9998		Wilcoxon Signed Rank Test
Range	2	2	1.999	1.992		Sum of signed ranks (W)	-22743	195380	16475	218444
						Sum of positive ranks	208355	407104	216858	318757
95% CI of median						Sum of negative ranks	-231098	-211724	-200383	-100313
Actual confidence level	95.01%	95.00%	95.30%	95.28%		P value (two tailed)	0.169986	<0.000001	0.301385	<0.000001
Lower confidence limit	-0.0645	0.1809	-0.002418	0.3736		Exact or estimate?	Approximate	Approximate	Approximate	Approximate
Upper confidence limit	0.05586	0.3212	0.1206	0.5084		P value summary	ns	****	ns	****
						Significant (alpha=0.05)?	No	Yes	No	Yes
Mean	-0.02673	0.1705	0.02088	0.2919
Std. Deviation	0.5939	0.6007	0.6074	0.5767		How big is the discrepancy?
Std. Error of Mean	0.0194	0.01801	0.0201	0.01907		Discrepancy	0.0001708	0.2593	0.0529	0.4571
Lower 95% CI of mean	-0.06481	0.1351	-0.01857	0.2545
Upper 95% CI of mean	0.01134	0.2058	0.06034	0.3293
Sum	-25.05	189.5	19.07	267.1
	Average Speed (µm min-1)
	Non-cognate			Cognate
Tmouroid	Control	CCL3/4-secreting	CTLs + Tumour cells
Number of values	937	1112	913	915
Minimum	0.883	0.8517	0.6593	0.5979
25% Percentile	6.353	7.105	6.166	7.075
Median	8.294	8.734	7.924	8.913		Kruskal-Wallis test
75% Percentile	10.09	10.69	9.926	10.62		P value	<0.000001
Maximum	18.43	18.15	16.73	18.73		Exact or approximate P value?	Approximate
Range	17.54	17.3	16.07	18.13		P value summary	****
						Do the medians vary signif. (P < 0.05)?	Yes
95% CI of median						Number of groups	4
Actual confidence level	95.01%	95.00%	95.30%	95.28%		Kruskal-Wallis statistic	58.3
Lower confidence limit	8.072	8.565	7.663	8.728
Upper confidence limit	8.595	9.048	8.177	9.11		Data summary
						Number of treatments (columns)	4
Mean	8.266	8.856	8.083	8.745		Number of values (total)	3877
Std. Deviation	2.865	2.849	2.801	2.755
Std. Error of Mean	0.0936	0.08544	0.09271	0.09107		Number of families	1
						Number of comparisons per family	6
Lower 95% CI of mean	8.082	8.689	7.901	8.567		Alpha	0.05
Upper 95% CI of mean	8.449	9.024	8.265	8.924
						Dunn's multiple comparisons test	Mean rank diff.	Significant?	Summary	Adjusted P Value
Sum	7745	9848	7380	8002		WT vs. EL-4 CCL3-CCL4	-230.1	Yes	****	2.1e-05	A-B
						WT vs. Neg	90.16	No	ns	0.499488	A-C
						WT vs. Pos	-214.2	Yes	***	0.000231	A-D
						EL-4 CCL3-CCL4 vs. Neg	320.3	Yes	****	<0.000001	B-C
						EL-4 CCL3-CCL4 vs. Pos	15.94	No	ns	>0.999999	B-D
						Neg vs. Pos	-304.3	Yes	****	<0.000001	C-D
