# Supplementary material for: Cytotoxic T cells swarm by homotypic chemokine signalling
Source: eLife. 2020 Oct 13;9:e56554. doi: 10.7554/eLife.56554 (PMC7669268; doi:10.7554/eLife.56554)
Supplement: Figure 5—figure supplement 2—source data 1. [file elife-56554-fig5-figsupp2-data1.xlsx]

## Sheet: Figure 5 -Supplement 3B
	EL4 WT	EL4 CCL3 / CCL4
Number of values	4	4
Minimum	-0.06597	0.2974
25% Percentile	-0.04885	0.322
Median	0.06732	0.4424
75% Percentile	0.1487	0.5532
Maximum	0.1542	0.5746
Range	0.2202	0.2772
95% CI of median
Actual confidence level	87.50%	87.50%
Lower confidence limit	-0.06597	0.2974
Upper confidence limit	0.1542	0.5746
Mean	0.05572	0.4392
Std. Deviation	0.1052	0.1194
Std. Error of Mean	0.05258	0.05972
Lower 95% CI of mean	-0.1116	0.2491
Upper 95% CI of mean	0.223	0.6292
Column B	EL4 CCL3 / CCL4
vs.	vs.
Column A	EL4 WT
Mann Whitney test
P value	0.0286
Exact or approximate P value?	Exact
P value summary	*
Significantly different (P < 0.05)?	Yes
One- or two-tailed P value?	Two-tailed
Sum of ranks in column A,B	10 , 26

## Sheet: Figure 5 - Supplement 3D
	Spleen	Control Tumours	CCL3/4-secreting Tumours
Number of values	4	4	4
Minimum	0.4574	0.4291	0.9772
25% Percentile	0.4627	0.4391	0.9866
Median	0.5145	0.4905	1.033
75% Percentile	0.5837	0.5742	1.101
Maximum	0.5949	0.5949	1.118
Range	0.1375	0.1657	0.1405
95% CI of median
Actual confidence level	87.50%	87.50%	87.50%
Lower confidence limit	0.4574	0.4291	0.9772
Upper confidence limit	0.5949	0.5949	1.118
Mean	0.5203	0.5012	1.04
Std. Deviation	0.0636	0.07102	0.05981
Std. Error of Mean	0.0318	0.03551	0.0299
Lower 95% CI of mean	0.4191	0.3882	0.945
Upper 95% CI of mean	0.6215	0.6142	1.135
Sum	2.081	2.005	4.161
ANOVA summary
F	88.58
P value	1e-06
P value summary	****
Significant diff. among means (P < 0.05)?	Yes
R square	0.9517
Tukey's multiple comparisons test	Mean Diff.	95.00% CI of diff.	Significant?	Summary	Adjusted P Value
Spleen vs. WT EL4	0.0191	-0.1092 to 0.1474	No	ns	0.910076
Spleen vs. CCL3/CCL4 EL4	-0.5198	-0.6481 to -0.3915	Yes	****	3e-06
WT EL4 vs. CCL3/CCL4 EL4	-0.5389	-0.6672 to -0.4106	Yes	****	3e-06

## Sheet: Figure 5 -Supplement 3F
	no GBT1	with gBT1
Number of values	6	6
Minimum	0	5693
25% Percentile	0	6064
Median	0	13989
75% Percentile	0	17149
Maximum	0	19569
Range	0	13876
95% CI of median
Actual confidence level	96.88%	96.88%
Lower confidence limit	0	5693
Upper confidence limit	0	19569
Mean	0	12628
Std. Deviation	0	5658
Std. Error of Mean	0	2310
Lower 95% CI of mean	0	6691
Upper 95% CI of mean	0	18565
Column B	with gBT1
vs.	vs.
Column A	no GBT1
Mann Whitney test
P value	0.0022
Exact or approximate P value?	Exact
P value summary	**
Significantly different (P < 0.05)?	Yes
One- or two-tailed P value?	Two-tailed
Sum of ranks in column A,B	21 , 57

## Sheet: Figure 5 - Supplement 3G
Data: Normalised tumour volumes (tumour volume normalised to day of T cell transfer (d=0) for each tumour)
	OT1.WT																				OT1.CCR5-/-
T cell transfer	m1	m2	m3	m4	m5	m6	m7	m8	m9	m10	m11	m12	m13	m14	m15	m16	m17	m18			mx1	mx2	mx3	mx4	mx5	mx6	mx7	mx8	mx9	mx10	mx11	mx12	mx13	mx14	mx15	mx16	mx17	mx18	mx19	mx20
d+1	1.42011	1.05101	2.18638	1.01845	1.38295	1.56228	2.26082	1.70627	0.673347	1.7095	0.685837	1.64711	1.57288	1.25348	0.816482	1.88795	0.979243	1.18525			1.24887	1.7111	1.97814	1.28879	1.0715	1.25533	1.11202	1.43112	2.74119	1.99124	1.72376	1.92117	2.30869	1.91882	1.91298	1.34456	0.992642	1.17398	1.19514	1.30209
d+2	1.51762	1.14096	1.08371	0.813572	2.24036	1.88245	2.85557	2.65589	1.64469	2.24064	1.40384	2.21589	1.82887	1.46258	0.74749	1.87725	1.18372	1.37027			0.871394	0.861227	0.865673	0.718106	1.64872	1.51087	1.34807	1.52059	2.39271	2.17704	2.06001	2.03603	1.53524	0.944152	1.26538	1.72595	0.942977	1.23232	0.98143	0.832876
d+3	1.29235	1.00513	0.710394	0.860507	2.0462	2.10375	2.63135	2.2571	3.53139	2.84616	1.53546	2.07064	1.66632	3.01533	0.713702	1.07827	0.740499	0.997934			0.745353	0.707414	0.972713	1.02367	1.3304	1.35715	1.72448	1.51067	2.90124	1.74355	1.29128	1.73878	1.19425	0.86798	0.687413	0.541917	0.841294	0.726475	0.901932	0.911268
d+4	0.914258	0.979821	0.928972	0.713791	2.01051	1.39448	4.582	1.91935	1.16711	1.80502	1.36582	1.98631	3.19793	2.36224	0.472054	1.52658	0.719052	0.945387			0.51683	0.670939	0.782254	0.637274	1.19439	1.19895	1.07658	1.65026	1.97154	1.58092	1.62217	2.27842	1.01623	0.777165	0.652985	0.363879	0.944671	0.511782	0.558994	0.582479
d+5					1.83423	1.20586	3.20125	2.39967	1.6742	2.06404	1.55317	2.13611													1.31765	1.37942	1.81649	1.74533	2.21076	2.04198	1.36854	1.62314
d+6	0.450219	0.485272	0.245147	0.182596	1.83279	1.31148	1.98235	1.65253	1.46778	1.91657	1.30989	1.6633			0.13747	0.14055	0.465524	0.40018			0.3016	0.275595	0.449786	0.235913	1.08328	1.37942	1.34911	1.22591	1.34445	1.45653	1.09951	1.3708	0.375318	0.39393	0.123415	0.151449	0.157885	0.24633	0.199553	0.276541
d+7	0.506445	0.323707	0.168499	0.289694	1.22978	0.892158	1.86989	1.49075	1.36683	1.69129	0.866492	1.34435			0.194888	0.188348	0.319777	0.494433			0.29859	0.282658	0.186164	0.185786	0.72229	0.930492	0.977265	0.823242	1.34503	1.30924	0.826275	0.883158	0.211981	0.320394	0.00105367	0.000992045	0.132886	0.115798	0.196712	0.167517
d+8	0.17997	0.143041	0.037729	0.0150169	1.04116	0.696454	2.34566	1.1707	0.926556	1.42621	0.754945	0.961592	0.00726842	0.000159716	0.152893	0.119761	0.0336751	0.0135037			0.0328218	0.0178192	0.0117523	0.00715674	0.606219	0.782948	0.88149	0.66127	1.01756	0.704046	0.622081	1.06688	0.000131709	0.000124006	0.000107267	0.000107607	0.0506145	0.0346268
Descriptive statistics
	OT1.WT				OT1.CCR5-/-
		95% confidence				95% confidence
T cell transfer	mean	upper limit	lower limit	Standard deviation	mean	upper limit	lower limit	Standard deviation
d+1	1.38885	1.62376	1.15395	1.38885	1.58116	1.8006	1.36172	1.58116
d+2	1.67585	1.97402	1.37769	1.67585	1.37354	1.61148	1.13559	1.37354
d+3	1.72792	2.16472	1.29112	1.72792	1.18596	1.44367	0.928253	1.18596
d+4	1.61059	2.11288	1.1083	1.61059	1.02944	1.28118	0.777689	1.02944
d+5	2.00857	2.51697	1.50016	2.00857	1.68791	1.96284	1.41298	1.68791
d+6	0.977728	1.35955	0.595908	0.977728	0.674817	0.921295	0.428339	0.674817
d+7	0.827333	1.14276	0.511908	0.827333	0.495876	0.698802	0.292951	0.495876
d+8	0.557016	0.883727	0.230306	0.557016	0.360986	0.566763	0.15521	0.360986
Multiple t-tests	Significant?	P value	Mean of OT1.WT	Mean of OT1.CCR5-/-	Difference	SE of difference	t ratio	df	Adjusted P Value
T cell transfer			1	1	0	0
d+1	No	0.216515	1.389	1.581	-0.1923	0.1529	1.258	36	0.50823
d+2	No	0.101298	1.676	1.374	0.3023	0.1798	1.682	36	0.413756
d+3	No	0.027128	1.728	1.186	0.542	0.2353	2.304	36	0.197497
d+4	No	0.030958	1.611	1.029	0.5812	0.2588	2.246	36	0.197585
d+5	No	0.210678	2.009	1.688	0.3207	0.2444	1.312	14	0.50823
d+6	No	0.152888	0.9777	0.6748	0.3029	0.2072	1.462	34	0.485051
d+7	No	0.060791	0.8273	0.4959	0.3315	0.1709	1.939	34	0.313606
d+8	No	0.291646	0.557	0.361	0.196	0.183	1.071	34	0.50823
