# Supplementary material for: Cytotoxic T cells swarm by homotypic chemokine signalling
Source: eLife. 2020 Oct 13;9:e56554. doi: 10.7554/eLife.56554 (PMC7669268; doi:10.7554/eLife.56554)
Supplement: Figure 5—source data 1. [file elife-56554-fig5-data1.xlsx]

## Sheet: Figure 5 - A
	Forward migration index (FMI)
	Migrating polyclonal CD8+/CD44+
	Non-cognate	Cognate
	WT		CCR5-/-
Number of values	1121	1133	1000
Minimum	-0.9998	-0.9999	-0.9987
25% Percentile	-0.4358	-0.184	-0.4622
Median	0.1276	0.4105	0.07956
75% Percentile	0.5919	0.7977	0.6623
Maximum	0.9995	1	1
Range	1.999	2	1.999
95% CI of median
Actual confidence level	95.00%	95.00%	95.37%
Lower confidence limit	0.05862	0.3478	0.0241
Upper confidence limit	0.1881	0.4584	0.1599
Mean	0.07436	0.2656	0.07743
Std. Deviation	0.5977	0.5928	0.6099
Std. Error of Mean	0.01785	0.01731	0.01929
Lower 95% CI of mean	0.03933	0.2316	0.03958
Upper 95% CI of mean	0.1094	0.2996	0.1153
Table Analyzed	Data 2
Kruskal-Wallis test
P value	<0.000001
Exact or approximate P value?	Approximate
P value summary	****
Do the medians vary signif. (P < 0.05)?	Yes
Number of groups	3
Kruskal-Wallis statistic	78.52
Data summary
Number of treatments (columns)	3
Number of values (total)	3293
Number of families	1
Number of comparisons per family	3
Alpha	0.05
Dunn's multiple comparisons test	Mean rank diff.	Significant?	Summary	Adjusted P Value
Non-cognate WT CD8CD44 vs. Cognate WT	-311.7	Yes	****	<0.000001	A-B
Non-cognate WT CD8CD44 vs. Cognate CCR5KO	-11.1	No	ns	>0.999999	A-C
Cognate WT vs. Cognate CCR5KO	300.6	Yes	****	<0.000001	B-C
Test details	Mean rank 1	Mean rank 2	Mean rank diff.	n1	n2	Z
Non-cognate WT CD8CD44 vs. Cognate WT	1533	1844	-311.7	1121	1172	7.848
Non-cognate WT CD8CD44 vs. Cognate CCR5KO	1533	1544	-11.1	1121	1000	0.2684
Cognate WT vs. Cognate CCR5KO	1844	1544	300.6	1172	1000	7.345

## Sheet: Figure 5 - D
	OT1	CCR5KO-OT1
Number of values	1255	553
Minimum	1.781	1.781
25% Percentile	96.33	65.9
Median	229.7	152.7
75% Percentile	412.3	306.1
Maximum	927.1	917.7
Range	925.3	915.9
95% CI of median
Actual confidence level	95.00%	95.89%
Lower confidence limit	212.9	140.3
Upper confidence limit	249.3	178.1
Mean	278.1	214.8
Std. Deviation	216.7	194.4
Std. Error of Mean	6.117	8.268
Lower 95% CI of mean	266.1	198.6
Upper 95% CI of mean	290.1	231.1
Sum	348974	118797
Statistical test
Mann Whitney U p-val = 7.563714914044059e-10

## Sheet: Figure 5 - F
Absolute cell counts	WT OT1 no gBT1	CCR5KO OT1 no GBT1	WT OT1 +gBT1	CCR5ko OT1 +gBT1
Number of values	6	6	6	6
Minimum	39435	18866	115953	64844
25% Percentile	43628	26296	121676	89950
Median	54598	46035	132889	101161
75% Percentile	95478	63854	167443	119297
Maximum	153289	65324	228784	123593
Range	113854	46458	112831	58749
95% CI of median
Actual confidence level	96.88%	96.88%	96.88%	96.88%
Lower confidence limit	39435	18866	115953	64844
Upper confidence limit	153289	65324	228784	123593
Mean	70526	44733	146849	101157
Std. Deviation	42737	18672	41478	20612
Std. Error of Mean	17447	7623	16934	8415
Lower 95% CI of mean	25676	25137	103320	79526
Upper 95% CI of mean	115375	64328	190378	122788
	KO 48h noGBT	OT1.CCR5-/-	WT 48h +GBT	KO 48h +GBT
	vs.	vs.	vs.	vs.
	WT 48h noGBT	OT1.WT	WT 48h noGBT	KO 48h noGBT
Mann Whitney test
P value	0.3939	0.0152	0.0411	0.0043
Exact or approximate P value?	Exact	Exact	Exact	Exact
P value summary	ns	*	*	**
Significantly different (P < 0.05)?	No	Yes	Yes	Yes
One- or two-tailed P value?	Two-tailed	Two-tailed	Two-tailed	Two-tailed
Sum of ranks in column A,B	45 , 33	54 , 24	26 , 52	22 , 56
