# Supplementary material for: Cytotoxic T cells swarm by homotypic chemokine signalling
Source: eLife. 2020 Oct 13;9:e56554. doi: 10.7554/eLife.56554 (PMC7669268; doi:10.7554/eLife.56554)
Supplement: Figure 6—figure supplement 1—source data 1. [file elife-56554-fig6-figsupp1-data1.xlsx]

## Sheet: Figure 6 - Supple 1C
Cytotoxic Index	Untransduced T cells	Unsorted CAR T cells
Number of values	3	3
Minimum	-0.002321	0.4065
25% Percentile	-0.002321	0.4065
Median	0.002132	0.4621
75% Percentile	0.004318	0.5782
Maximum	0.004318	0.5782
Range	0.006639	0.1716
95% CI of median
Actual confidence level	75.00%	75.00%
Lower confidence limit	-0.002321	0.4065
Upper confidence limit	0.004318	0.5782
Mean	0.001376	0.4823
Std. Deviation	0.003384	0.08757
Std. Error of Mean	0.001954	0.05056
Lower 95% CI of geo. mean		0.3064
Upper 95% CI of geo. mean		0.7429
Statistical test	Unpaired t test
P value	0.0007
P value summary	***
Significantly different (P < 0.05)?	Yes
One- or two-tailed P value?	Two-tailed
t, df	t=9.505, df=4
