# Supplementary material for: Cytotoxic T cells swarm by homotypic chemokine signalling
Source: eLife. 2020 Oct 13;9:e56554. doi: 10.7554/eLife.56554 (PMC7669268; doi:10.7554/eLife.56554)
Supplement: Figure 6—source data 1. [file elife-56554-fig6-data1.xlsx]

## Sheet: Figure 6 - A
	Transmigration index
	Control Beads	CCL3+CCL4	αCD3/CD28 beads	αCD3/CD28 beads + Cenicriviroc
Number of values	5	4	6	4
Minimum	0.7261	1.743	1.528	0.5754
25% Percentile	0.7744	1.809	1.581	0.6307
Median	0.8513	2.137	1.691	0.8588
75% Percentile	0.8866	2.43	2.001	0.9594
Maximum	0.9184	2.485	2.265	0.9723
Range	0.1923	0.7422	0.7375	0.3969
95% CI of median
Actual confidence level	93.75%	87.50%	96.88%	87.50%
Lower confidence limit	0.7261	1.743	1.528	0.5754
Upper confidence limit	0.9184	2.485	2.265	0.9723
Mean	0.8347	2.126	1.781	0.8163
Std. Deviation	0.07005	0.3208	0.2705	0.1767
Std. Error of Mean	0.03133	0.1604	0.1104	0.08836
Lower 95% CI of mean	0.7477	1.615	1.497	0.5351
Upper 95% CI of mean	0.9216	2.636	2.065	1.098
Sum	4.173	8.502	10.69	3.265
Statistical test:	1-way ANOVA
F	37.68
P value	<0.000001
P value summary	****
Significant diff. among means (P < 0.05)?	Yes
R square	0.8829
Tukey's multiple comparisons test	Mean Diff.	95.00% CI of diff.	Significant?	Summary	Adjusted P Value
Control beads vs. CCL3 + CCL4	-1.291	-1.734 to -0.8478	Yes	****	3e-06	A-B
Control beads vs. αCD3/CD28 beads	-0.9465	-1.346 to -0.5465	Yes	****	3.1e-05	A-C
Control beads vs. αCD3/CD28 beads + Cenicriviroc	0.01836	-0.4248 to 0.4615	No	ns	0.999363	A-D
CCL3 + CCL4 vs. αCD3/CD28 beads	0.3444	-0.08200 to 0.7708	No	ns	0.135635	B-C
CCL3 + CCL4 vs. αCD3/CD28 beads + Cenecriviroc	1.309	0.8422 to 1.776	Yes	****	4e-06	B-D
αCD3/CD28 beads vs. αCD3/CD28 beads + Cencriviroc	0.9649	0.5385 to 1.391	Yes	****	5.2e-05	C-D

## Sheet: Figure 6 - C
	Forward migration index (FMI)
	Vehicle		Cenicriviroc
Tumouroid	Control beads	αCD3/C28 beads
Number of values	996	1120	1171
Minimum	-0.9988	-0.9999	-1
25% Percentile	-0.5661	-0.3975	-0.5597
Median	-0.01547	0.1862	-0.02051
75% Percentile	0.4994	0.6822	0.4968
Maximum	0.9989	0.9985	1
Range	1.998	1.998	2
95% CI of median
Actual confidence level	95.41%	95.00%	95.00%
Lower confidence limit	-0.09236	0.1078	-0.08369
Upper confidence limit	0.03762	0.2457	0.02228
Mean	-0.03006	0.1237	-0.01928
Std. Deviation	0.6005	0.6009	0.6075
Std. Error of Mean	0.01903	0.01796	0.01775
Lower 95% CI of mean	-0.0674	0.08848	-0.05411
Upper 95% CI of mean	0.007276	0.1589	0.01555
Sum	-29.94	138.6	-22.58
Statistical test	two-tailed Wilcoxon signed rank test
	Vehicle		Cenicriviroc
	Control beads	αCD3/C28 beads
Theoretical median	0	0	0
Actual median	-0.01547	0.1862	-0.02051
Number of values	996	1120	1171
Wilcoxon Signed Rank Test
Sum of signed ranks (W)	-28826	146880	-25200
Sum of positive ranks	233840	387320	330503
Sum of negative ranks	-262666	-240440	-355703
P value (two tailed)	0.1125	<0.0001	0.2764
Exact or estimate?	Approximate	Approximate	Approximate
P value summary	ns	****	ns
Significant (alpha=0.05)?	No	Yes	No
How big is the discrepancy?
Discrepancy	-0.01547	0.1862	-0.02051
