# Supplementary material for: Cytotoxic T cells swarm by homotypic chemokine signalling
Source: eLife. 2020 Oct 13;9:e56554. doi: 10.7554/eLife.56554 (PMC7669268; doi:10.7554/eLife.56554)
Supplement: Supplementary file 1. — Transcriptomics data of CTLs alone, in indicated conjugations or exposed to indicated supernatants from conjugations with tumour cells. Values are read counts obtained from featureCounts after alignment with TopHat2 to the GRCm38 reference genome. [file elife-56554-supp1.xlsx]

## Sheet: gene_expressed.csv
	Ensembl	Gene_short_name	OT1 exposed to non-cognate cells	Resting OT1	OT1 exposed to cognate cells	OT1 exposed to cognate beads	OT1 exposed to non-cognate supernatant	OT1 exposed to cognate supernatant
1	ENSMUSG00000000001	Gnai3	31108	33792	27899	33648	31679	34484
2	ENSMUSG00000000003	Pbsn	0	0	0	0	0	0
3	ENSMUSG00000000028	Cdc45	8667	9617	7796	7570	8513	8118
4	ENSMUSG00000000031	H19	0	0	229	0	0	0
5	ENSMUSG00000000037	Scml2	17	37	8	8	31	41
6	ENSMUSG00000000049	Apoh	0	2	0	0	0	1
7	ENSMUSG00000000056	Narf	3251	7417	2384	1640	5219	5785
8	ENSMUSG00000000058	Cav2	392	595	317	293	561	564
9	ENSMUSG00000000078	Klf6	25656	30545	31783	35967	27654	29103
10	ENSMUSG00000000085	Scmh1	1209	808	1021	840	833	937
11	ENSMUSG00000000088	Cox5a	15436	14807	16930	14436	15398	15745
12	ENSMUSG00000000093	Tbx2	0	4	2	0	1	2
13	ENSMUSG00000000094	Tbx4	2	3	2	0	2	0
14	ENSMUSG00000000103	Zfy2	0	0	0	0	0	0
15	ENSMUSG00000000120	Ngfr	0	2	0	0	0	0
16	ENSMUSG00000000125	Wnt3	2	0	25	4	4	4
17	ENSMUSG00000000126	Wnt9a	8	10	3	0	4	2
18	ENSMUSG00000000127	Fer	9	13	2	0	3	4
19	ENSMUSG00000000131	Xpo6	19377	27780	15129	16545	24113	22885
20	ENSMUSG00000000134	Tfe3	3634	3131	4133	3725	2754	3387
21	ENSMUSG00000000142	Axin2	175	343	120	71	243	224
22	ENSMUSG00000000148	Brat1	2119	2458	1547	1352	2402	2064
23	ENSMUSG00000000149	Gna12	1712	2488	833	853	2085	2174
24	ENSMUSG00000000154	Slc22a18	0	0	0	0	0	3
25	ENSMUSG00000000157	Itgb2l	10	26	83	8	23	10
26	ENSMUSG00000000159	Igsf5	1739	2189	3058	1699	1885	1917
27	ENSMUSG00000000167	Pih1d2	23	92	26	35	45	57
28	ENSMUSG00000000168	Dlat	7209	6699	7526	7036	7078	7147
29	ENSMUSG00000000171	Sdhd	15470	17144	12167	12805	18378	18275
30	ENSMUSG00000000182	Fgf23	2	7	4	0	2	2
31	ENSMUSG00000000183	Fgf6	0	4	0	0	0	0
32	ENSMUSG00000000184	Ccnd2	72022	92992	88398	137274	85282	92002
33	ENSMUSG00000000194	Gpr107	3264	4709	3336	3448	4076	4184
34	ENSMUSG00000000197	Nalcn	0	0	0	0	0	0
35	ENSMUSG00000000202	Btbd17	10	8	2	11	10	12
36	ENSMUSG00000000204	Slfn4	12	38	16	20	36	22
37	ENSMUSG00000000214	Th	0	0	0	0	0	0
38	ENSMUSG00000000215	Ins2	0	0	0	0	0	0
39	ENSMUSG00000000216	Scnn1g	0	0	4	1	0	2
40	ENSMUSG00000000223	Drp2	35	56	49	18	67	34
41	ENSMUSG00000000244	Tspan32	1876	3558	402	429	3256	2271
42	ENSMUSG00000000247	Lhx2	96	96	36	24	111	101
43	ENSMUSG00000000248	Clec2g	2	3	1	2	0	3
44	ENSMUSG00000000253	Gmpr	2	6	6	2	2	7
45	ENSMUSG00000000263	Glra1	0	0	0	0	0	0
46	ENSMUSG00000000266	Mid2	92	52	237	74	79	53
47	ENSMUSG00000000275	Trim25	8328	11408	8948	14097	9804	11961
48	ENSMUSG00000000276	Dgke	2003	2044	2084	2877	1955	1813
49	ENSMUSG00000000278	Scpep1	7227	6505	5332	5741	6399	6352
50	ENSMUSG00000000282	Mnt	5185	6318	6651	8351	5639	5308
51	ENSMUSG00000000290	Itgb2	84573	89549	93332	91443	88849	88327
52	ENSMUSG00000000295	Hddc2	3029	2924	2275	2481	3018	2935
53	ENSMUSG00000000296	Tpd52l1	0	0	1	0	4	2
54	ENSMUSG00000000301	Pemt	262	430	205	244	333	365
55	ENSMUSG00000000303	Cdh1	5859	4102	12584	4090	3913	3845
56	ENSMUSG00000000305	Cdh4	0	0	0	0	0	0
57	ENSMUSG00000000308	Ckmt1	87	97	47	40	78	91
58	ENSMUSG00000000317	Bcl6b	28	19	209	111	23	14
59	ENSMUSG00000000318	Clec10a	6	2	23	3	20	18
60	ENSMUSG00000000320	Alox12	11	16	9	4	10	7
61	ENSMUSG00000000325	Arvcf	72	81	50	40	70	34
62	ENSMUSG00000000326	Comt	4302	6078	3639	4195	6066	5881
63	ENSMUSG00000000339	Rtca	3085	3497	2903	2810	3361	3466
64	ENSMUSG00000000340	Dbt	3236	2898	3099	3124	3030	3040
65	ENSMUSG00000000346	Dazap2	40874	41565	36444	40769	39030	40640
66	ENSMUSG00000000355	Mcts1	4554	5379	4854	5022	5695	5937
67	ENSMUSG00000000359	Rem1	0	0	0	0	2	0
68	ENSMUSG00000000365	Rnf17	44	53	115	42	51	47
69	ENSMUSG00000000374	Trappc10	12042	12683	7742	6700	10750	10253
70	ENSMUSG00000000378	Ccm2	4113	6900	3386	3061	5267	5256
71	ENSMUSG00000000381	Wap	0	0	0	0	0	0
72	ENSMUSG00000000384	Tbrg4	8062	10463	8348	8690	9726	8527
73	ENSMUSG00000000385	Tmprss2	0	0	0	0	0	0
74	ENSMUSG00000000386	Mx1	875	5260	1129	584	2950	2968
75	ENSMUSG00000000392	Fap	0	4	0	3	2	2
76	ENSMUSG00000000394	Gcg	3	4	1	0	8	6
77	ENSMUSG00000000399	Ndufa9	9022	8621	7726	8194	8712	8831
78	ENSMUSG00000000402	Egfl6	0	0	0	0	0	2
79	ENSMUSG00000000409	Lck	69719	78168	70587	64314	78536	74348
80	ENSMUSG00000000411	Tssk3	1	0	0	0	0	0
81	ENSMUSG00000000416	Cttnbp2	0	0	2	0	2	0
82	ENSMUSG00000000420	Galnt1	30181	30230	23668	25207	30594	32127
83	ENSMUSG00000000435	Myf5	0	0	0	0	0	0
84	ENSMUSG00000000439	Mkrn2	2466	2396	2367	1866	2234	2293
85	ENSMUSG00000000440	Pparg	5861	7079	2904	3907	7497	7894
86	ENSMUSG00000000441	Raf1	5182	6414	4236	3710	5815	5690
87	ENSMUSG00000000486	Sept1	28850	31443	23541	26099	31766	29913
88	ENSMUSG00000000489	Pdgfb	36	14	660	197	22	9
89	ENSMUSG00000000530	Acvrl1	10141	9326	10827	11063	9209	11384
90	ENSMUSG00000000531	Grasp	773	455	1435	1973	524	444
91	ENSMUSG00000000532	Acvr1b	2391	3013	1766	1750	2673	2720
92	ENSMUSG00000000538	Tom1l2	902	1267	838	668	1120	903
93	ENSMUSG00000000544	Gpa33	16	12	23	5	18	14
94	ENSMUSG00000000552	Zfp385a	298	392	151	100	244	255
95	ENSMUSG00000000555	Itga5	778	664	893	988	737	694
96	ENSMUSG00000000560	Gabra2	0	0	0	0	0	0
97	ENSMUSG00000000561	Wdr77	3193	6086	2825	3863	6007	5451
98	ENSMUSG00000000562	Adora3	2656	2029	3914	2331	2321	2383
99	ENSMUSG00000000563	Atp5f1	32216	31447	30222	31601	33406	34756
100	ENSMUSG00000000567	Sox9	0	0	0	4	0	0
101	ENSMUSG00000000568	Hnrnpd	39923	34304	38166	33268	37052	35322
102	ENSMUSG00000000579	Dynlt1c	1555	1375	1061	1313	1400	1265
103	ENSMUSG00000000581	C1d	4474	5159	3932	4949	5502	5434
104	ENSMUSG00000000594	Gm2a	53821	50921	31748	43570	48152	49113
105	ENSMUSG00000000600	Krit1	4217	8851	4957	4893	6929	6610
106	ENSMUSG00000000605	Clcn4	3106	6346	2596	3676	4968	4967
107	ENSMUSG00000000606	Vmn2r88	0	0	0	0	0	0
108	ENSMUSG00000000617	Grm6	0	0	3	0	0	2
109	ENSMUSG00000000627	Sema4f	2743	2199	550	734	2075	2175
110	ENSMUSG00000000628	Hk2	36041	29197	48866	79682	31405	28390
111	ENSMUSG00000000631	Myo18a	9510	12308	6319	5176	9693	8602
112	ENSMUSG00000000632	Sez6	0	0	0	0	0	0
113	ENSMUSG00000000673	Haao	4073	3682	3351	2883	3985	3422
114	ENSMUSG00000000682	Cd52	54199	67137	53855	60739	68118	70833
115	ENSMUSG00000000686	Abhd15	105	262	23	26	245	120
116	ENSMUSG00000000690	Hoxb6	1	0	0	0	2	0
117	ENSMUSG00000000693	Loxl3	14	20	13	15	15	11
118	ENSMUSG00000000701	Tcl1b5	0	0	0	0	0	0
119	ENSMUSG00000000706	Btn1a1	10	5	4	0	6	12
120	ENSMUSG00000000708	Kat2b	1712	3408	1623	2419	2351	2590
121	ENSMUSG00000000711	Rab5b	4884	6224	4523	3199	5493	5759
122	ENSMUSG00000000724	Cryba1	0	0	0	0	0	0
123	ENSMUSG00000000730	Dnmt3l	3	0	0	0	0	1
124	ENSMUSG00000000731	Aire	2	3	4	1	2	0
125	ENSMUSG00000000732	Icosl	2509	1142	1187	1041	1439	1598
126	ENSMUSG00000000738	Spg7	5778	4827	5673	5097	4970	4582
127	ENSMUSG00000000739	Sult5a1	0	5	11	0	2	0
128	ENSMUSG00000000740	Rpl13	13225	13386	14936	12239	12909	12042
129	ENSMUSG00000000743	Chmp1a	6576	7589	4225	4378	6580	6480
130	ENSMUSG00000000751	Rpa1	28881	29026	19682	16683	28872	26327
131	ENSMUSG00000000753	Serpinf1	2937	3099	650	1780	2988	3079
132	ENSMUSG00000000759	Tubgcp3	6982	10233	5674	5677	8594	8012
133	ENSMUSG00000000766	Oprm1	6	10	7	2	4	4
134	ENSMUSG00000000776	Polr3d	2849	3236	4339	6670	3218	3219
135	ENSMUSG00000000782	Tcf7	2371	1367	583	921	1199	1268
136	ENSMUSG00000000787	Ddx3x	48573	72464	47774	79939	65466	73727
137	ENSMUSG00000000791	Il12rb1	28086	31957	27848	33874	27873	25164
138	ENSMUSG00000000792	Slc5a5	2	8	6	4	4	0
139	ENSMUSG00000000794	Kcnn3	4	0	0	0	2	0
140	ENSMUSG00000000804	Usp32	3882	4493	2905	3461	4457	4153
141	ENSMUSG00000000805	Car4	0	0	10	0	0	0
142	ENSMUSG00000000811	Txnrd3	862	1057	535	637	1174	988
143	ENSMUSG00000000817	Fasl	2936	5173	7648	10581	4481	5123
144	ENSMUSG00000000823	Zfp512b	1615	3091	1173	1041	2611	2145
145	ENSMUSG00000000826	Dnajc5	15832	22333	17691	17646	18604	20747
146	ENSMUSG00000000827	Tpd52l2	5166	5938	4811	4278	6824	6457
147	ENSMUSG00000000838	Fmr1	6745	11049	5243	6109	8851	8536
148	ENSMUSG00000000861	Bcl11a	0	0	0	0	0	0
149	ENSMUSG00000000869	Il4	44	36	6	171	31	34
150	ENSMUSG00000000876	Pxmp4	2443	2039	1796	1626	2065	2079
151	ENSMUSG00000000881	Dlg3	506	332	268	214	341	393
152	ENSMUSG00000000884	Gnb1l	528	624	372	224	568	568
153	ENSMUSG00000000889	Dbh	0	0	0	0	0	0
154	ENSMUSG00000000901	Mmp11	93	48	38	12	55	50
155	ENSMUSG00000000902	Smarcb1	7433	9815	6534	5693	8876	8023
156	ENSMUSG00000000903	Vpreb3	11	32	48	22	26	21
157	ENSMUSG00000000915	Hip1r	8411	15265	11817	7899	11227	11032
158	ENSMUSG00000000916	Nsun5	963	1737	1059	1081	1470	1318
159	ENSMUSG00000000934	Top1mt	998	1191	830	635	1211	1120
160	ENSMUSG00000000938	Hoxa10	47	0	0	2	0	0
161	ENSMUSG00000000942	Hoxa4	0	0	2	0	0	0
162	ENSMUSG00000000948	Gm38393	0	2	4	0	2	0
163	ENSMUSG00000000957	Mmp14	32	40	362	45	35	56
164	ENSMUSG00000000958	Slc7a7	93	123	42	81	98	103
165	ENSMUSG00000000959	Oxa1l	7452	7652	6194	6267	7273	6917
166	ENSMUSG00000000976	Heatr6	3664	5425	3044	3416	4825	4655
167	ENSMUSG00000000982	Ccl3	69	40	99481	230646	20	49
168	ENSMUSG00000000983	Wfdc18	0	0	0	0	0	0
169	ENSMUSG00000001014	Icam4	71	76	64	47	67	36
170	ENSMUSG00000001016	Ilf2	7871	9596	8673	6612	9866	9550
171	ENSMUSG00000001017	Chtop	12831	16382	13617	12772	14870	14892
172	ENSMUSG00000001018	Snapin	3856	3527	2922	2253	3370	3074
173	ENSMUSG00000001020	S100a4	2253	2719	4212	2473	2818	2653
174	ENSMUSG00000001021	S100a3	66	79	18	25	54	77
175	ENSMUSG00000001023	S100a5	207	215	277	214	193	234
176	ENSMUSG00000001025	S100a6	49227	57024	59431	49231	61119	57557
177	ENSMUSG00000001027	Scn4a	1	11	4	7	0	0
178	ENSMUSG00000001029	Icam2	933	1702	530	595	1349	1286
179	ENSMUSG00000001034	Mapk7	2681	3046	2057	2043	2582	2402
180	ENSMUSG00000001036	Epn2	520	430	409	1063	349	408
181	ENSMUSG00000001039	B9d1	143	129	86	75	143	167
182	ENSMUSG00000001052	Sec24b	8298	8681	6330	8211	7998	7760
183	ENSMUSG00000001053	N4bp3	1550	1332	2426	1393	1177	1125
184	ENSMUSG00000001054	Rmnd5b	3606	4177	3298	2313	3814	3368
185	ENSMUSG00000001056	Nhp2	12695	16056	13283	14054	16775	15781
186	ENSMUSG00000001062	Vps9d1	567	915	537	427	761	702
187	ENSMUSG00000001065	Zfp276	682	1621	810	786	1309	981
188	ENSMUSG00000001076	C1ql4	0	1	2	0	0	0
189	ENSMUSG00000001082	Mfsd10	5007	5409	4112	4112	5024	4736
190	ENSMUSG00000001089	Luzp1	1466	2154	1343	813	1922	1946
191	ENSMUSG00000001095	Slc13a2	5	4	2	0	10	1
192	ENSMUSG00000001098	Kctd10	5949	6240	4677	6243	5095	5347
193	ENSMUSG00000001100	Poldip2	5425	6797	4085	3695	7618	6739
194	ENSMUSG00000001103	Sebox	0	0	0	0	0	0
195	ENSMUSG00000001105	Ift20	2595	3729	2526	2566	3629	3542
196	ENSMUSG00000001119	Col6a1	134	157	133	124	163	157
197	ENSMUSG00000001120	Pcbp3	205	273	73	84	202	184
198	ENSMUSG00000001123	Lgals9	11549	10932	5934	8689	10885	11116
199	ENSMUSG00000001127	Araf	5800	7732	6807	5077	7472	6567
200	ENSMUSG00000001128	Cfp	523	749	1256	706	749	714
201	ENSMUSG00000001131	Timp1	17	33	177	399	40	61
202	ENSMUSG00000001134	Uxt	195	323	300	301	294	319
203	ENSMUSG00000001138	Cnnm3	1014	2521	981	1035	1968	1728
204	ENSMUSG00000001143	Lman2l	1148	1382	1362	908	1248	1180
205	ENSMUSG00000001150	Mcm3ap	10950	12051	7081	8819	10354	9309
206	ENSMUSG00000001151	Pcnt	11034	13107	7626	7890	10784	9709
207	ENSMUSG00000001155	Ftcd	7	30	10	4	9	4
208	ENSMUSG00000001156	Mxd1	3096	2954	9274	11177	2655	4786
209	ENSMUSG00000001157	Gmcl1	3484	2810	2764	2679	2983	3037
210	ENSMUSG00000001158	Snrnp27	6721	6147	7444	6602	6925	7340
211	ENSMUSG00000001166	Oas1c	556	762	336	253	751	720
212	ENSMUSG00000001168	Oas1h	0	0	0	0	0	0
213	ENSMUSG00000001173	Ocrl	2339	2340	2164	1827	2446	2244
214	ENSMUSG00000001175	Calm1	103900	118396	115427	105850	118038	125789
215	ENSMUSG00000001211	Agpat3	18732	23662	16512	24068	21739	21879
216	ENSMUSG00000001225	Slc26a3	0	0	0	0	0	0
217	ENSMUSG00000001227	Sema6b	1613	1506	1328	1526	1844	1838
218	ENSMUSG00000001228	Uhrf1	22245	28787	11772	6738	24561	19409
219	ENSMUSG00000001229	Dpp9	10636	14168	10294	9461	12404	11962
220	ENSMUSG00000001240	Ramp2	13	15	16	6	8	16
221	ENSMUSG00000001247	Lsr	125	104	151	69	123	142
222	ENSMUSG00000001248	Gramd1a	17776	28166	46629	33811	22790	18204
223	ENSMUSG00000001249	Hpn	0	8	16	6	9	2
224	ENSMUSG00000001260	Gabrg1	0	0	0	0	0	0
225	ENSMUSG00000001270	Ckb	1044	922	447	779	894	834
226	ENSMUSG00000001280	Sp1	22850	20348	20639	17904	18042	17507
227	ENSMUSG00000001281	Itgb7	65327	68210	52829	52860	60647	56579
228	ENSMUSG00000001285	Myg1	3368	4019	2982	2759	4094	3775
229	ENSMUSG00000001288	Rarg	1490	2076	1261	975	1628	1743
230	ENSMUSG00000001289	Pfdn5	9004	9496	9398	9092	10903	10215
231	ENSMUSG00000001300	Efnb2	97	120	283	88	111	149
232	ENSMUSG00000001305	Rrp15	4013	7350	4462	5950	7885	7076
233	ENSMUSG00000001313	Rnd2	211	187	228	208	214	192
234	ENSMUSG00000001323	Srr	561	767	473	400	756	708
235	ENSMUSG00000001333	Sync	5	2	11	11	14	12
236	ENSMUSG00000001334	Fndc5	1	0	0	0	0	0
237	ENSMUSG00000001348	Acp5	5823	6566	5133	4260	6545	6260
238	ENSMUSG00000001349	Cnn1	6	0	1	2	1	2
239	ENSMUSG00000001366	Fbxo9	1778	3598	2037	1641	3160	3012
240	ENSMUSG00000001376	Vps50	2117	3401	3030	2516	3061	2833
241	ENSMUSG00000001380	Hars	14284	17764	13742	14509	18299	17998
242	ENSMUSG00000001383	Zmat2	9948	11706	9174	8604	11420	12032
243	ENSMUSG00000001403	Ube2c	25857	21916	23096	15922	21484	21244
244	ENSMUSG00000001415	Smg5	9393	17239	11928	10909	13682	14529
245	ENSMUSG00000001416	Cct3	33322	40284	32504	34524	42951	41170
246	ENSMUSG00000001418	Glmp	7947	8228	8830	7318	7111	7353
247	ENSMUSG00000001419	Mef2d	12307	14193	16744	14113	12553	12729
248	ENSMUSG00000001420	Tmem79	46	139	112	68	118	101
249	ENSMUSG00000001424	Snd1	33932	30709	27185	26806	30247	29146
250	ENSMUSG00000001435	Col18a1	694	651	335	228	620	540
251	ENSMUSG00000001436	Slc19a1	4456	5945	4178	4602	6756	5429
252	ENSMUSG00000001440	Kpnb1	80762	108521	59056	63227	95267	96358
253	ENSMUSG00000001441	Npepps	11494	14177	10191	11400	12561	13276
254	ENSMUSG00000001444	Tbx21	5349	8455	13647	26276	5978	6541
255	ENSMUSG00000001445	Mrpl10	6089	6423	4970	4292	6037	5693
256	ENSMUSG00000001467	Cyp51	46586	49126	42714	41894	48621	54456
257	ENSMUSG00000001472	Tcf25	39576	41015	39416	36217	38253	38383
258	ENSMUSG00000001473	Tubb6	24429	24505	34248	31137	24104	28118
259	ENSMUSG00000001482	Def8	2960	3617	1638	1534	3363	3238
260	ENSMUSG00000001493	Meox1	0	0	0	0	0	0
261	ENSMUSG00000001494	Sost	0	0	0	0	0	0
262	ENSMUSG00000001496	Nkx2-1	0	0	0	0	0	0
263	ENSMUSG00000001497	Pax9	4	2	15	4	6	2
264	ENSMUSG00000001504	Irx2	8	8	28	1	6	0
265	ENSMUSG00000001506	Col1a1	4	9	17	12	8	5
266	ENSMUSG00000001507	Itga3	1381	1057	9550	12120	1048	2182
267	ENSMUSG00000001508	Sgca	0	0	0	0	0	0
268	ENSMUSG00000001510	Dlx3	0	2	2	8	0	0
269	ENSMUSG00000001517	Foxm1	8084	9926	5178	3212	7515	7095
270	ENSMUSG00000001518	Itfg2	1421	1713	1225	955	1593	1287
271	ENSMUSG00000001520	Nrip2	62	189	16	81	108	97
272	ENSMUSG00000001521	Tulp3	1508	1110	993	717	1307	1155
273	ENSMUSG00000001524	Gtf2h4	2281	2839	1979	1747	2690	2543
274	ENSMUSG00000001525	Tubb5	238916	201605	179778	125931	191707	172532
275	ENSMUSG00000001542	Ell2	5500	4590	17654	13971	4376	4711
276	ENSMUSG00000001552	Jup	1061	892	1622	673	715	816
277	ENSMUSG00000001555	Fkbp10	7	8	2	7	11	10
278	ENSMUSG00000001558	Klhl10	19	46	21	9	37	33
279	ENSMUSG00000001566	Mnx1	0	0	0	0	0	0
280	ENSMUSG00000001569	Nom1	5548	8103	5785	6863	8014	7598
281	ENSMUSG00000001576	Ergic1	18750	22450	20138	17481	21347	20221
282	ENSMUSG00000001583	Tnk1	1	0	0	2	0	0
283	ENSMUSG00000001588	Acap1	24404	25812	27831	18144	24430	19381
284	ENSMUSG00000001604	Tcea3	3	3	0	0	2	1
285	ENSMUSG00000001622	Csn3	25	58	6	18	36	50
286	ENSMUSG00000001627	Ifrd1	8193	8793	18688	6480	9387	8625
287	ENSMUSG00000001630	Stk38l	1384	1470	2892	3819	1543	1437
288	ENSMUSG00000001632	Brpf1	5464	8011	5370	4738	6610	6572
289	ENSMUSG00000001642	Akr1b3	2041	2266	2110	1693	2599	2289
290	ENSMUSG00000001655	Hoxc13	0	0	0	0	0	0
291	ENSMUSG00000001656	Hoxc11	0	0	0	0	0	0
292	ENSMUSG00000001657	Hoxc8	0	0	0	0	0	0
293	ENSMUSG00000001661	Hoxc6	2	4	4	0	6	2
294	ENSMUSG00000001663	Gstt1	614	398	353	219	488	442
295	ENSMUSG00000001665	Gstt3	506	435	344	177	463	380
296	ENSMUSG00000001666	Ddt	1981	2074	1873	1956	2160	2237
297	ENSMUSG00000001670	Tat	6	0	2	0	0	0
298	ENSMUSG00000001672	Marveld3	1	0	0	0	0	0
299	ENSMUSG00000001674	Ddx18	4836	7015	5100	5601	6825	6186
300	ENSMUSG00000001687	Ubl3	13596	13888	17977	21088	13403	15014
301	ENSMUSG00000001700	Gramd3	2691	5818	5985	4963	4649	5152
302	ENSMUSG00000001707	Eef1e1	6293	5125	8810	10276	6789	6294
303	ENSMUSG00000001729	Akt1	34066	46540	34027	30964	43655	43968
304	ENSMUSG00000001739	Cldn15	0	8	6	2	4	8
305	ENSMUSG00000001741	Il16	6006	11628	3137	2131	8864	8411
306	ENSMUSG00000001750	Tcirg1	2596	4014	2978	2450	3577	2564
307	ENSMUSG00000001751	Naglu	1736	1539	1180	1098	1608	1381
308	ENSMUSG00000001755	Coasy	3715	3947	3013	1945	4029	3501
309	ENSMUSG00000001761	Smo	2402	2456	437	1223	2479	2533
310	ENSMUSG00000001763	Tspan33	9	22	5	6	17	14
311	ENSMUSG00000001767	Crnkl1	5880	7342	5310	5601	6691	7220
312	ENSMUSG00000001768	Rin2	8	12	7	2	17	6
313	ENSMUSG00000001773	Folh1	0	0	0	0	0	0
314	ENSMUSG00000001774	Chordc1	8476	13734	8673	9114	11829	13054
315	ENSMUSG00000001783	Rtcb	20929	25557	19895	21909	25367	24906
316	ENSMUSG00000001785	Pwp1	7209	9821	7645	8787	10438	8996
317	ENSMUSG00000001786	Fbxo7	1940	2073	1416	957	1940	1859
318	ENSMUSG00000001794	Capns1	38320	36944	38936	37373	35317	35863
319	ENSMUSG00000001802	Lrp3	0	0	0	4	0	0
320	ENSMUSG00000001804	Dsg4	8	4	8	2	6	5
321	ENSMUSG00000001815	Evx2	0	0	0	0	0	0
322	ENSMUSG00000001819	Hoxd13	2	2	0	0	0	0
323	ENSMUSG00000001823	Hoxd12	0	0	0	0	0	0
324	ENSMUSG00000001827	Folr1	0	0	0	0	0	0
325	ENSMUSG00000001829	Clpb	3380	3664	2870	2662	3476	3265
326	ENSMUSG00000001833	Sept7	38010	44777	48127	46621	45178	46393
327	ENSMUSG00000001844	Zdhhc4	2355	3335	2170	2354	3070	2813
328	ENSMUSG00000001847	Rac1	54826	60096	44464	51693	52281	58056
329	ENSMUSG00000001855	Nup214	12172	15304	8790	10610	13417	12236
330	ENSMUSG00000001864	Aif1l	74	31	54	30	43	21
331	ENSMUSG00000001865	Cpa3	566	637	406	229	562	613
332	ENSMUSG00000001870	Ltbp1	0	0	0	0	0	2
333	ENSMUSG00000001891	Ugp2	9676	8460	9505	8356	8509	9095
334	ENSMUSG00000001901	Kcnh6	16	10	1	4	4	4
335	ENSMUSG00000001909	Trmt1	4828	7507	4724	4876	6663	5669
336	ENSMUSG00000001910	Nacc1	18012	20036	16040	16527	19123	19186
337	ENSMUSG00000001911	Nfix	175	314	49	79	288	201
338	ENSMUSG00000001918	Slc1a5	17440	30086	31629	23678	28139	22376
339	ENSMUSG00000001924	Uba1	105704	101899	95318	95322	100045	94660
340	ENSMUSG00000001930	Vwf	0	3	5	4	0	2
341	ENSMUSG00000001942	Siae	1123	1142	938	704	1091	1043
342	ENSMUSG00000001943	Vsig2	5	3	2	4	2	2
343	ENSMUSG00000001946	Esam	0	0	3	0	0	0
344	ENSMUSG00000001948	Spa17	81	97	68	94	95	94
345	ENSMUSG00000001962	Fam50a	4279	4624	4112	3460	4460	4276
346	ENSMUSG00000001964	Emd	11083	11892	13478	10506	11821	12063
347	ENSMUSG00000001983	Taco1	1370	2167	978	915	2012	2044
348	ENSMUSG00000001985	Grik3	0	0	0	0	0	0
349	ENSMUSG00000001986	Gria3	73	65	9	18	35	52
350	ENSMUSG00000001988	Npas1	24	46	24	17	16	17
351	ENSMUSG00000001995	Sipa1l2	765	851	3575	4310	689	899
352	ENSMUSG00000001998	Ap4e1	2603	3245	2856	2984	2685	2766
353	ENSMUSG00000001999	Blvra	3719	4089	3737	3289	4316	4489
354	ENSMUSG00000002006	Pdzd4	13	122	19	37	98	67
355	ENSMUSG00000002007	Srpk3	5	7	3	2	11	5
356	ENSMUSG00000002010	Idh3g	13553	14781	12000	11546	13535	12887
357	ENSMUSG00000002012	Pnck	2	10	9	8	5	1
358	ENSMUSG00000002014	Ssr4	11240	12837	14190	11187	15228	14268
359	ENSMUSG00000002015	Bcap31	16294	16261	15584	15159	16778	16477
360	ENSMUSG00000002017	Fam98a	4994	7788	5580	7060	7488	7569
361	ENSMUSG00000002020	Ltbp2	0	2	8	0	2	2
362	ENSMUSG00000002028	Kmt2a	17304	27287	14068	13073	20822	19101
363	ENSMUSG00000002031	Ift46	3625	3260	3088	2041	2836	2851
364	ENSMUSG00000002032	Tmem25	97	95	74	40	67	63
365	ENSMUSG00000002033	Cd3g	53964	58057	70383	58118	57615	62177
366	ENSMUSG00000002043	Trappc6a	6608	6077	6483	5916	6648	6413
367	ENSMUSG00000002052	Supt6	26649	27329	32734	37204	23846	22857
368	ENSMUSG00000002055	Spag5	9950	9155	6639	4749	8411	7199
369	ENSMUSG00000002057	Foxn1	1	2	0	0	2	0
370	ENSMUSG00000002058	Unc119	8168	7269	7332	4024	7894	7858
371	ENSMUSG00000002059	Rab34	170	126	275	126	160	137
372	ENSMUSG00000002064	Sdf2	3340	3399	4171	3491	3454	3540
373	ENSMUSG00000002068	Ccne1	5467	7730	5825	3946	7705	7953
374	ENSMUSG00000002076	Hsf2bp	44	41	74	90	37	60
375	ENSMUSG00000002083	Bbc3	2661	3834	2140	599	3152	2681
376	ENSMUSG00000002100	Mybpc3	4	8	6	0	8	0
377	ENSMUSG00000002102	Psmc3	21734	27789	20613	20786	26691	27215
378	ENSMUSG00000002103	Acp2	1243	1826	805	808	1733	1511
379	ENSMUSG00000002104	Rapsn	315	345	84	163	394	317
380	ENSMUSG00000002105	Slc39a13	536	956	501	421	859	778
381	ENSMUSG00000002107	Celf2	30096	37399	24897	26812	33831	34639
382	ENSMUSG00000002108	Nr1h3	9	42	15	7	30	40
383	ENSMUSG00000002109	Ddb2	1509	1458	1286	855	1608	1021
384	ENSMUSG00000002111	Spi1	2	3	0	0	0	6
385	ENSMUSG00000002129	Sf3a1	23316	25679	19248	18635	22923	22251
386	ENSMUSG00000002147	Stat6	26149	24130	29249	29212	24098	26172
387	ENSMUSG00000002190	Clgn	37	29	28	10	19	18
388	ENSMUSG00000002204	Napsa	3540	3763	6915	3122	4039	4086
389	ENSMUSG00000002205	Vrk3	3913	4469	3500	3697	3796	3759
390	ENSMUSG00000002210	Smg9	2807	4634	1905	2194	3247	3160
391	ENSMUSG00000002221	Paxip1	7336	12370	6877	5098	10803	9615
392	ENSMUSG00000002222	Rmnd5a	11084	12118	6564	6822	10429	10834
393	ENSMUSG00000002227	Mov10	8373	4888	6259	3868	4846	4643
394	ENSMUSG00000002228	Ppm1j	5972	6273	7212	5843	6639	5724
395	ENSMUSG00000002233	Rhoc	1994	1789	3038	1677	1856	1705
396	ENSMUSG00000002240	Prr27	0	0	0	0	0	0
397	ENSMUSG00000002249	Tead3	7	0	12	2	2	2
398	ENSMUSG00000002250	Ppard	4487	4840	7876	5322	4814	5059
399	ENSMUSG00000002257	Def6	24222	30049	20119	18062	24426	25069
400	ENSMUSG00000002265	Peg3	7	12	0	4	8	4
401	ENSMUSG00000002266	Zim1	0	0	0	0	0	0
402	ENSMUSG00000002274	Metrn	308	282	234	143	298	247
403	ENSMUSG00000002279	Lmf1	1993	1745	1719	1502	1550	1541
404	ENSMUSG00000002280	Narfl	1204	2091	1013	1012	1784	1578
405	ENSMUSG00000002289	Angptl4	1902	3337	1360	1593	2832	2695
406	ENSMUSG00000002297	Dbf4	12929	14713	8056	6166	14307	12827
407	ENSMUSG00000002307	Daxx	4330	4538	3505	3888	4465	4472
408	ENSMUSG00000002308	Cd320	943	1223	893	812	1459	1322
409	ENSMUSG00000002319	Ipo4	6643	9032	6848	6763	9311	7541
410	ENSMUSG00000002320	Tm9sf1	4031	5555	3760	3269	4920	4600
411	ENSMUSG00000002324	Rec8	49	28	0	15	64	33
412	ENSMUSG00000002325	Irf9	3657	6341	2252	4356	4480	5944
413	ENSMUSG00000002326	Gmpr2	4056	4634	3388	3629	4517	4122
414	ENSMUSG00000002329	Mdp1	3442	4586	2903	2292	4712	4019
415	ENSMUSG00000002332	Dhrs1	3819	3922	3795	3499	3604	3655
416	ENSMUSG00000002341	Ncan	0	0	2	9	0	0
417	ENSMUSG00000002342	Tmem161a	2528	2788	2524	1812	2698	2610
418	ENSMUSG00000002343	Armc6	1255	2744	742	1212	2428	1814
419	ENSMUSG00000002345	Borcs8	2133	2666	2560	2186	2309	2412
420	ENSMUSG00000002346	Slc25a42	399	781	221	130	628	423
421	ENSMUSG00000002365	Snx9	6886	7313	11817	12121	7355	8892
422	ENSMUSG00000002372	Ranbp3	8180	12227	7132	6578	10577	9990
423	ENSMUSG00000002379	Ndufa11	3832	4251	3721	3489	4383	4179
424	ENSMUSG00000002384	Bmp8b	2	0	2	2	3	2
425	ENSMUSG00000002393	Nr2f6	387	620	472	539	621	596
426	ENSMUSG00000002395	Use1	3992	4673	4446	3869	5038	4573
427	ENSMUSG00000002396	Ocel1	1270	1718	1178	997	1414	1217
428	ENSMUSG00000002409	Dyrk1b	434	350	360	268	311	245
429	ENSMUSG00000002413	Braf	7459	6184	9317	7749	6219	6528
430	ENSMUSG00000002416	Ndufb2	687	765	807	764	972	893
431	ENSMUSG00000002428	Hltf	6690	9767	7215	6226	8305	8574
432	ENSMUSG00000002455	Prpf6	11123	11010	9539	9796	10680	10040
433	ENSMUSG00000002458	Rgs19	7104	8278	5786	4523	8300	7490
434	ENSMUSG00000002459	Rgs20	0	0	0	0	1	0
435	ENSMUSG00000002475	Abhd3	4	10	8	6	6	8
436	ENSMUSG00000002477	Snrpd1	10087	11405	9121	10457	13177	13399
437	ENSMUSG00000002486	Tchp	599	1417	724	879	913	999
438	ENSMUSG00000002489	Tiam1	2620	3211	905	1480	2358	2162
439	ENSMUSG00000002496	Tsc2	4832	5581	4218	3441	4938	4638
440	ENSMUSG00000002500	Rpl3l	5	0	4	2	5	5
441	ENSMUSG00000002504	Slc9a3r2	32	38	40	6	44	39
442	ENSMUSG00000002524	Puf60	17276	20200	14666	13382	19102	18240
443	ENSMUSG00000002546	Golga2	11991	11175	9485	8888	10091	9856
444	ENSMUSG00000002550	Uck1	2617	3876	2251	2155	2989	3198
445	ENSMUSG00000002565	Scin	2311	3474	7815	3124	3147	3344
446	ENSMUSG00000002578	Ikzf4	5343	3195	4563	6481	3432	3387
447	ENSMUSG00000002580	Mien1	1711	1623	1706	1695	1910	1728
448	ENSMUSG00000002588	Pon1	0	0	0	0	0	0
449	ENSMUSG00000002602	Axl	4816	6548	4228	3670	5325	4910
450	ENSMUSG00000002603	Tgfb1	57888	43358	74920	65949	41898	47071
451	ENSMUSG00000002608	Ccdc97	2991	4230	2272	1799	3129	2858
452	ENSMUSG00000002617	Zfp40	335	1398	402	290	985	966
453	ENSMUSG00000002625	Akap8l	2858	2987	2891	1584	2453	2220
454	ENSMUSG00000002633	Shh	0	0	0	0	0	0
455	ENSMUSG00000002635	Pdcd2l	1147	1312	1161	1189	1456	1303
456	ENSMUSG00000002658	Gtf2f1	14256	18300	12985	12657	16447	16732
457	ENSMUSG00000002660	Clpp	2915	3097	3124	3032	3724	3261
458	ENSMUSG00000002661	Alkbh7	704	580	505	416	721	589
459	ENSMUSG00000002664	Pspn	12	14	6	5	14	12
460	ENSMUSG00000002668	Dennd1c	2999	6432	4100	2763	4961	3889
461	ENSMUSG00000002679	Med6	1081	1404	1086	960	1431	1486
462	ENSMUSG00000002688	Prkd1	0	0	0	0	0	0
463	ENSMUSG00000002699	Lcp2	33228	31274	48969	74463	28439	28432
464	ENSMUSG00000002718	Cse1l	16195	21914	12536	13272	22512	21269
465	ENSMUSG00000002728	Naa20	3708	5468	4462	4849	5624	5871
466	ENSMUSG00000002731	Prkra	1713	1350	1406	1205	1588	1488
467	ENSMUSG00000002732	Fkbp7	164	146	146	128	188	152
468	ENSMUSG00000002733	Plekha3	4148	4139	5475	6232	4407	4421
469	ENSMUSG00000002741	Ykt6	13881	21509	12926	13106	18322	19409
470	ENSMUSG00000002748	Baz1b	24702	42852	20947	15930	38037	35396
471	ENSMUSG00000002763	Pex6	2198	2500	2099	1878	2222	1825
472	ENSMUSG00000002767	Mrpl2	3964	4378	3072	2614	4651	4326
473	ENSMUSG00000002768	Mea1	5549	5907	5746	5235	5984	6131
474	ENSMUSG00000002769	Gnmt	9	20	7	3	16	13
475	ENSMUSG00000002771	Grin2d	32	47	30	27	38	30
476	ENSMUSG00000002778	Kdelr1	11194	11000	9110	9238	10727	11093
477	ENSMUSG00000002781	Tmem143	1331	1155	984	671	1254	1016
478	ENSMUSG00000002791	Pdxk-ps	12	6	7	6	12	20
479	ENSMUSG00000002797	Ggct	1246	1534	995	1046	1713	1451
480	ENSMUSG00000002799	Jag2	831	699	707	564	709	708
481	ENSMUSG00000002803	Btbd6	582	1064	663	494	877	790
482	ENSMUSG00000002804	Nudt14	1541	1336	1132	1059	1557	1433
483	ENSMUSG00000002808	Epdr1	130	222	275	187	230	222
484	ENSMUSG00000002812	Flii	29552	30985	24928	23935	27512	26616
485	ENSMUSG00000002814	Top3a	2242	3321	1748	1641	2659	2428
486	ENSMUSG00000002820	Atg4d	2172	2392	2626	3219	2254	2707
487	ENSMUSG00000002825	Qtrt1	1443	2483	1568	1567	2587	2282
488	ENSMUSG00000002831	Plin4	0	9	0	0	0	0
489	ENSMUSG00000002833	Hdgfrp2	7061	7494	6290	4383	7514	6259
490	ENSMUSG00000002835	Chaf1a	7634	11052	4848	3158	9401	8779
491	ENSMUSG00000002844	Adprh	10819	8118	8596	7893	8464	8211
492	ENSMUSG00000002845	Tmem39a	3632	3867	6008	5421	3635	4103
493	ENSMUSG00000002846	Timmdc1	2181	2613	2974	2139	2981	2640
494	ENSMUSG00000002847	Pla1a	144	162	503	343	136	164
495	ENSMUSG00000002870	Mcm2	29080	38959	22861	15644	36375	32900
496	ENSMUSG00000002871	Tpra1	1317	1634	1388	747	1607	1177
497	ENSMUSG00000002881	Nab1	15932	15224	22914	23262	15583	21144
498	ENSMUSG00000002885	Adgre5	7159	10018	7489	11532	7779	6333
499	ENSMUSG00000002897	Il17ra	10768	17377	6979	8794	13016	12718
500	ENSMUSG00000002900	Lamb1	12	2	6	4	2	5
501	ENSMUSG00000002908	Kcnn1	14	25	14	2	30	19
502	ENSMUSG00000002910	Arrdc2	1271	1231	954	527	1317	1145
503	ENSMUSG00000002930	Ppp1r17	0	0	0	0	0	0
504	ENSMUSG00000002944	Cd36	58	77	19	66	112	95
505	ENSMUSG00000002948	Map2k7	5066	6015	4455	4054	5056	5003
506	ENSMUSG00000002949	Timm44	7448	9529	7429	6523	9830	8972
507	ENSMUSG00000002957	Ap2a2	12760	13514	11401	10110	12967	13236
508	ENSMUSG00000002963	Pnkp	3756	3735	3432	2792	3938	3598
509	ENSMUSG00000002968	Med25	8251	10168	7724	6975	9086	9100
510	ENSMUSG00000002980	Bcam	363	301	109	104	332	386
511	ENSMUSG00000002981	Clptm1	12375	15634	13390	13574	14272	14677
512	ENSMUSG00000002983	Relb	3015	816	5669	4355	945	1430
513	ENSMUSG00000002984	Tomm40	10291	13623	10083	11612	14091	13258
514	ENSMUSG00000002985	Apoe	111	699	197	257	373	283
515	ENSMUSG00000002992	Apoc2	0	0	0	0	0	0
516	ENSMUSG00000002996	Hbp1	6228	7839	5732	4482	6928	6664
517	ENSMUSG00000002997	Prkar2b	2632	2385	1453	1380	2496	2033
518	ENSMUSG00000003031	Cdkn1b	10969	16782	9315	4184	15417	12490
519	ENSMUSG00000003032	Klf4	43	69	119	72	45	53
520	ENSMUSG00000003033	Ap1m1	12355	15668	9694	10237	13893	13109
521	ENSMUSG00000003037	Rab8a	28649	36065	26274	24555	33661	34486
522	ENSMUSG00000003038	Hmgn2	10881	11946	11761	9330	10008	10073
523	ENSMUSG00000003039	Fam32a	5239	7773	4415	5083	7578	7561
524	ENSMUSG00000003051	Elf3	0	0	2	0	0	0
525	ENSMUSG00000003053	Cyp2c29	0	0	0	0	0	0
526	ENSMUSG00000003062	Stard3nl	2191	2389	2210	1540	2445	2218
527	ENSMUSG00000003068	Stk11	7703	10478	9512	6813	9444	8935
528	ENSMUSG00000003070	Efna2	10	37	12	8	7	13
529	ENSMUSG00000003072	Atp5d	37639	34872	45076	41538	34164	35329
530	ENSMUSG00000003099	Ppp5c	11386	15739	10496	9800	16365	14892
531	ENSMUSG00000003119	Cdk12	10664	13375	8821	10542	10396	11153
532	ENSMUSG00000003123	Lipe	884	676	1011	747	668	672
533	ENSMUSG00000003131	Pafah1b2	15347	17046	17966	19605	16955	17419
534	ENSMUSG00000003134	Tbc1d8	33	81	40	34	87	66
535	ENSMUSG00000003135	Cnot11	5261	7601	4561	5526	6128	6359
536	ENSMUSG00000003153	Slc2a3	187362	120244	257231	320675	131735	151094
537	ENSMUSG00000003154	Foxj2	3066	3601	3207	2647	3123	3187
538	ENSMUSG00000003161	Sri	20171	20225	19047	18409	20369	21078
539	ENSMUSG00000003166	Dgcr2	3528	5509	2592	3948	4317	4206
540	ENSMUSG00000003184	Irf3	3963	6700	4700	3881	6445	5336
541	ENSMUSG00000003190	Bcl2l12	768	875	803	479	923	724
542	ENSMUSG00000003198	Zfp959	419	1296	416	448	898	962
543	ENSMUSG00000003199	Mpnd	8081	7552	5531	6907	7950	7582
544	ENSMUSG00000003200	Sh3gl1	4115	6928	5075	3402	6035	5657
545	ENSMUSG00000003206	Ebi3	2359	2144	1410	1314	2058	2116
546	ENSMUSG00000003208	Ccdc94	876	1250	770	835	978	996
547	ENSMUSG00000003226	Ranbp2	52883	62188	45261	56427	60301	60591
548	ENSMUSG00000003227	Edar	0	0	0	0	0	0
549	ENSMUSG00000003228	Grk5	587	777	1061	719	536	503
550	ENSMUSG00000003233	Dvl3	1662	2719	2165	2072	2047	2156
551	ENSMUSG00000003234	Abcf3	4104	5142	4242	3513	5294	4831
552	ENSMUSG00000003235	Eif2b5	12539	14960	11200	11026	14635	14588
553	ENSMUSG00000003269	Cyth2	3867	3939	4760	4916	3481	3456
554	ENSMUSG00000003271	Sult2b1	488	855	3016	3057	818	1268
555	ENSMUSG00000003273	Car11	0	2	0	0	4	4
556	ENSMUSG00000003279	Dlgap1	27	4	2	2	2	2
557	ENSMUSG00000003282	Plag1	292	231	284	187	190	233
558	ENSMUSG00000003283	Hck	0	2	0	0	0	0
559	ENSMUSG00000003299	Mrpl4	6199	6398	5824	5046	6236	5952
560	ENSMUSG00000003308	Keap1	8160	10998	7084	6582	10091	10066
561	ENSMUSG00000003309	Ap1m2	67	95	91	47	81	87
562	ENSMUSG00000003316	Glg1	22650	21135	15732	16543	19682	19296
563	ENSMUSG00000003341	Atp8b3	2	10	0	5	4	6
564	ENSMUSG00000003344	Btbd2	3047	2677	1454	1247	2599	2203
565	ENSMUSG00000003345	Csnk1g2	21251	23045	20742	18285	22496	21156
566	ENSMUSG00000003346	Abhd17a	8108	8005	7628	6163	8376	7443
567	ENSMUSG00000003348	Mob3a	5716	5460	3871	3161	4743	4524
568	ENSMUSG00000003352	Cacnb3	970	917	842	506	988	814
569	ENSMUSG00000003354	Ccdc65	0	2	0	0	2	0
570	ENSMUSG00000003355	Fkbp11	309	355	296	340	514	491
571	ENSMUSG00000003360	Ddx23	11734	15843	9747	10884	14081	14334
572	ENSMUSG00000003363	Pld3	21784	19053	30776	30411	17958	19860
573	ENSMUSG00000003378	Grik5	461	597	298	152	520	453
574	ENSMUSG00000003379	Cd79a	13	30	12	6	28	12
575	ENSMUSG00000003380	Rabac1	5912	5224	5203	5315	5761	5413
576	ENSMUSG00000003382	Etv3	5790	4327	10265	7432	4120	4010
577	ENSMUSG00000003402	Prkcsh	23018	20637	26558	26820	19883	19771
578	ENSMUSG00000003410	Elavl3	1	8	0	2	0	0
579	ENSMUSG00000003411	Rab3b	4	3	2	6	5	7
580	ENSMUSG00000003418	St8sia6	15	12	0	0	14	15
581	ENSMUSG00000003420	Fcgrt	46	41	18	26	38	45
582	ENSMUSG00000003421	Nosip	5440	6985	2864	2942	5996	5733
583	ENSMUSG00000003423	Pih1d1	3106	3392	3039	2518	3069	3019
584	ENSMUSG00000003429	Rps11	29393	29023	33228	29287	32594	29591
585	ENSMUSG00000003435	Supt5	16760	22114	14787	13196	19569	17699
586	ENSMUSG00000003436	Dll3	2	5	4	1	0	3
587	ENSMUSG00000003437	Paf1	7069	9893	7329	6807	9143	8728
588	ENSMUSG00000003438	Timm50	5506	7353	5744	5806	8040	7150
589	ENSMUSG00000003444	Med29	628	836	608	815	807	861
590	ENSMUSG00000003452	Bicd1	94	183	198	104	151	184
591	ENSMUSG00000003458	Ncstn	10630	11856	9091	9838	10585	10360
592	ENSMUSG00000003464	Pex19	4192	4889	3430	3589	4480	4666
593	ENSMUSG00000003469	Phyhip	2	6	0	2	4	0
594	ENSMUSG00000003476	Crhr2	0	0	2	0	0	0
595	ENSMUSG00000003477	Inmt	0	0	0	0	0	0
596	ENSMUSG00000003484	Cyp4f18	0	2	0	0	0	7
597	ENSMUSG00000003500	Impdh1	19733	20853	18395	16845	21445	20187
598	ENSMUSG00000003505	Psg18	0	0	0	0	0	2
599	ENSMUSG00000003518	Dusp3	1982	1895	3264	2096	2231	2205
600	ENSMUSG00000003526	Prodh	77	134	35	68	177	120
601	ENSMUSG00000003527	Dgcr14	3205	4147	2658	2552	3556	3585
602	ENSMUSG00000003528	Slc25a1	12073	8792	8678	7336	10323	9256
603	ENSMUSG00000003531	Dgcr6	819	735	666	512	820	745
604	ENSMUSG00000003534	Ddr1	952	1269	1794	3052	1362	1447
605	ENSMUSG00000003541	Ier3	12578	8966	29289	38032	11135	12261
606	ENSMUSG00000003545	Fosb	160	15	863	827	18	26
607	ENSMUSG00000003546	Klc4	780	902	423	521	712	639
608	ENSMUSG00000003549	Ercc1	2331	3177	2228	2454	2665	2464
609	ENSMUSG00000003555	Cyp17a1	0	2	2	0	0	0
610	ENSMUSG00000003559	As3mt	345	382	72	131	393	386
611	ENSMUSG00000003573	Homer3	141	213	146	104	269	306
612	ENSMUSG00000003575	Crtc1	2246	3426	929	1760	2632	2377
613	ENSMUSG00000003581	Rnf215	660	944	576	370	811	659
614	ENSMUSG00000003585	Sec14l2	85	94	38	31	96	83
615	ENSMUSG00000003604	Aven	2739	3951	2416	2282	3531	3732
616	ENSMUSG00000003617	Cp	4	1	6	11	8	2
617	ENSMUSG00000003623	Crot	5078	9384	3397	2795	7866	7072
618	ENSMUSG00000003644	Rps6ka1	37281	39157	45846	47988	38760	36478
619	ENSMUSG00000003657	Calb2	0	0	0	0	0	0
620	ENSMUSG00000003660	Snrnp200	41573	39329	28757	36942	35656	32646
621	ENSMUSG00000003662	Ciao1	3586	4627	3056	3564	4233	4474
622	ENSMUSG00000003665	Has1	0	5	0	0	0	3
623	ENSMUSG00000003680	Taf6l	4302	4608	4226	3687	4658	4400
624	ENSMUSG00000003721	Insig2	2534	2420	3263	2438	2386	2759
625	ENSMUSG00000003731	Kpna6	10841	10737	11409	11274	11370	11097
626	ENSMUSG00000003746	Man1a	10365	9709	11122	16403	8927	10329
627	ENSMUSG00000003752	Itpkc	520	496	841	906	449	404
628	ENSMUSG00000003762	Adck4	1371	1334	1311	1118	1318	1238
629	ENSMUSG00000003778	Brd8	8499	9924	6575	4360	8230	7050
630	ENSMUSG00000003779	Kif20a	10937	11388	6835	3594	10027	9611
631	ENSMUSG00000003808	Farsa	7083	9790	7648	7095	10177	9161
632	ENSMUSG00000003809	Gcdh	1786	2245	1102	1172	2141	1899
633	ENSMUSG00000003810	Mast2	4605	6391	3650	3311	5693	5584
634	ENSMUSG00000003812	Dnase2a	986	1105	804	624	1109	1186
635	ENSMUSG00000003813	Rad23a	9977	9230	9949	8446	9675	9493
636	ENSMUSG00000003814	Calr	124072	161039	153771	123549	159733	167783
637	ENSMUSG00000003824	Syce2	8727	7199	8467	7289	8124	7961
638	ENSMUSG00000003847	Nfat5	10604	11966	34025	35159	9921	9800
639	ENSMUSG00000003848	Nob1	6257	8076	5873	7542	8002	7198
640	ENSMUSG00000003849	Nqo1	192	308	77	147	278	296
641	ENSMUSG00000003863	Ppfia3	174	192	288	107	198	179
642	ENSMUSG00000003865	Gys1	9297	7243	6734	4970	6807	6721
643	ENSMUSG00000003868	Ruvbl2	17891	16948	15687	14733	18210	16618
644	ENSMUSG00000003872	Lin7b	11	15	12	8	4	6
645	ENSMUSG00000003873	Bax	7288	9722	6354	6320	9267	8694
646	ENSMUSG00000003882	Il7r	13676	18843	17879	29967	16253	25215
647	ENSMUSG00000003923	Tfam	5265	6562	4742	4805	6236	6089
648	ENSMUSG00000003929	Zfp81	1521	1749	1711	1327	1621	1657
649	ENSMUSG00000003934	Efnb3	20	104	27	26	58	31
650	ENSMUSG00000003948	Mmd	2657	4474	5470	6150	3967	4521
651	ENSMUSG00000003949	Hlf	145	138	68	56	94	118
652	ENSMUSG00000003955	Fam162a	31276	25934	30615	29938	26973	29146
653	ENSMUSG00000003970	Rpl8	173363	168932	180821	181947	181228	180712
654	ENSMUSG00000003974	Grm3	0	0	0	0	0	0
655	ENSMUSG00000003992	Ssbp2	1625	1537	1151	1340	1565	1520
656	ENSMUSG00000004018	Fancl	1274	1252	1152	829	1370	1286
657	ENSMUSG00000004031	Brinp2	0	0	0	1	0	0
658	ENSMUSG00000004032	Gstm5	230	255	961	240	233	283
659	ENSMUSG00000004035	Gstm7	7	11	1	6	5	4
660	ENSMUSG00000004038	Gstm3	0	0	0	0	0	0
661	ENSMUSG00000004040	Stat3	46081	50809	87281	91767	48882	68356
662	ENSMUSG00000004043	Stat5a	7839	9148	20390	15573	8572	7826
663	ENSMUSG00000004044	Ptrf	112	49	117	176	55	95
664	ENSMUSG00000004054	Map3k11	6138	6624	11606	12615	5502	6319
665	ENSMUSG00000004056	Akt2	12078	13930	15096	14509	12468	12940
666	ENSMUSG00000004069	Dnaja3	8442	9166	7979	8329	9254	8766
667	ENSMUSG00000004070	Hmox2	5625	5401	4325	3798	5715	5703
668	ENSMUSG00000004071	Cdip1	1188	1491	1635	1276	1323	1371
669	ENSMUSG00000004085	Zak	687	1192	143	400	971	1527
670	ENSMUSG00000004096	Cwc15	18105	18951	18825	17472	18818	19788
671	ENSMUSG00000004098	Col5a3	6	5	9	5	5	9
672	ENSMUSG00000004099	Dnmt1	49229	59205	29435	26349	52077	44333
673	ENSMUSG00000004100	Ppan	7034	8600	10272	12227	9053	7242
674	ENSMUSG00000004105	Angptl2	591	933	282	871	880	703
675	ENSMUSG00000004110	Cacna1e	2	4	6	0	2	3
676	ENSMUSG00000004113	Cacna1b	18	29	16	14	24	19
677	ENSMUSG00000004127	Trmt10a	1216	1643	1211	1223	1523	1435
678	ENSMUSG00000004151	Etv1	3	2	0	0	2	0
679	ENSMUSG00000004187	Kifc2	41	72	45	20	61	23
680	ENSMUSG00000004207	Psap	25901	25049	16314	16050	23494	22677
681	ENSMUSG00000004221	Ikbkg	4606	5254	3820	3046	4954	4580
682	ENSMUSG00000004231	Pax2	0	0	0	0	0	0
683	ENSMUSG00000004233	Wars2	768	1067	682	597	914	826
684	ENSMUSG00000004263	Atn1	279	265	334	267	205	248
685	ENSMUSG00000004264	Phb2	23187	26989	25727	23525	29094	25762
686	ENSMUSG00000004266	Ptpn6	26073	19384	36720	27967	19897	15850
687	ENSMUSG00000004267	Eno2	67	75	57	69	73	42
688	ENSMUSG00000004268	Emg1	13157	15246	14364	14296	16273	15759
689	ENSMUSG00000004270	Lpcat3	11193	12915	9604	10113	11881	12319
690	ENSMUSG00000004285	Atp6v1f	7864	7563	8120	7019	8539	8432
691	ENSMUSG00000004296	Il12b	0	0	0	0	0	0
692	ENSMUSG00000004317	Clcn5	4104	4187	4629	4625	3664	3645
693	ENSMUSG00000004319	Clcn3	21676	37885	20185	21550	30296	33035
694	ENSMUSG00000004328	Hif3a	605	528	189	224	657	544
695	ENSMUSG00000004341	Gpx6	0	2	0	0	0	0
696	ENSMUSG00000004344	Gpx5	0	0	0	0	0	0
697	ENSMUSG00000004347	Pde1c	1	4	6	2	2	2
698	ENSMUSG00000004356	Utp20	6584	15872	5673	7965	13706	11482
699	ENSMUSG00000004359	Spic	0	0	0	0	0	0
700	ENSMUSG00000004360	9330159F19Rik	0	0	0	0	0	0
701	ENSMUSG00000004364	Cul3	30872	29884	28397	26928	29273	29608
702	ENSMUSG00000004366	Sst	0	0	0	0	0	0
703	ENSMUSG00000004371	Il11	6	7	4	5	13	5
704	ENSMUSG00000004383	Large	48	111	67	32	86	86
705	ENSMUSG00000004393	Ddx56	5723	6872	5257	5355	8194	6857
706	ENSMUSG00000004394	Tmed4	3062	3328	3818	2632	3347	3486
707	ENSMUSG00000004415	Col26a1	0	1	0	0	0	0
708	ENSMUSG00000004446	Bid	2723	4132	1792	1878	4478	3734
709	ENSMUSG00000004451	Ralb	2313	2344	1138	1245	2430	2555
710	ENSMUSG00000004455	Ppp1cc	12785	16300	15660	15106	16586	17650
711	ENSMUSG00000004460	Dnajb11	16013	24381	19586	18566	22615	24911
712	ENSMUSG00000004462	Tbccd1	1158	2433	880	868	2049	2132
713	ENSMUSG00000004473	Clec11a	52	66	42	29	45	37
714	ENSMUSG00000004500	Zfp324	709	1908	777	716	1564	1598
715	ENSMUSG00000004508	Gab2	1682	895	720	833	1192	1108
716	ENSMUSG00000004530	Coro1c	22732	25931	18104	17843	24724	23617
717	ENSMUSG00000004535	Tax1bp1	51577	49216	44430	57910	47440	46862
718	ENSMUSG00000004540	Psg17	96	82	422	85	115	98
719	ENSMUSG00000004542	Psg19	0	1	4	0	2	0
720	ENSMUSG00000004552	Ctse	589	694	432	480	605	653
721	ENSMUSG00000004558	Ndrg2	9562	5630	4606	4123	5664	5364
722	ENSMUSG00000004561	Mettl17	628	1607	857	673	1332	1005
723	ENSMUSG00000004562	Arhgef40	275	227	94	84	202	170
724	ENSMUSG00000004565	Pnpla6	1595	2576	1724	1102	2313	1793
725	ENSMUSG00000004567	Mcoln1	1300	2183	1872	1311	1770	1432
726	ENSMUSG00000004568	Arhgef18	1887	5535	766	427	3624	2621
727	ENSMUSG00000004591	Pkn2	8892	10392	8679	8317	9490	9956
728	ENSMUSG00000004609	Cd33	4	2	23	68	0	0
729	ENSMUSG00000004610	Etfb	611	618	780	629	756	672
730	ENSMUSG00000004612	Nkg7	51227	50433	89870	88782	53833	53292
731	ENSMUSG00000004613	Lim2	0	0	0	0	0	0
732	ENSMUSG00000004626	Stxbp2	16457	14656	15342	12780	15526	14413
733	ENSMUSG00000004630	Pcp2	0	3	1	0	0	1
734	ENSMUSG00000004631	Sgce	15	20	5	9	20	32
735	ENSMUSG00000004633	Chn2	159	294	176	271	229	154
736	ENSMUSG00000004637	Wwox	1495	1396	1287	1234	1416	1304
737	ENSMUSG00000004642	Slbp	10480	14394	6532	4623	12256	12248
738	ENSMUSG00000004651	Tyr	0	0	0	0	2	0
739	ENSMUSG00000004654	Ghrhr	0	0	0	0	0	0
740	ENSMUSG00000004655	Aqp1	0	0	0	0	0	0
741	ENSMUSG00000004661	Arid3b	2046	2744	3335	2800	2241	2175
742	ENSMUSG00000004665	Cnn2	43499	38629	39180	31374	39835	37936
743	ENSMUSG00000004667	Polr2e	9399	11418	8785	8095	12190	11021
744	ENSMUSG00000004668	Abca13	2	0	2	0	0	0
745	ENSMUSG00000004677	Myo9b	17634	24196	17137	17149	21384	20412
746	ENSMUSG00000004698	Hdac9	11	18	6	0	10	6
747	ENSMUSG00000004707	Ly9	9257	11437	5512	7524	10119	9224
748	ENSMUSG00000004709	Cd244	5107	5732	12922	6810	5879	5287
749	ENSMUSG00000004730	Adgre1	3	0	0	0	0	2
750	ENSMUSG00000004748	Mtfp1	218	303	191	171	330	261
751	ENSMUSG00000004768	Rab23	525	1244	279	418	917	1003
752	ENSMUSG00000004771	Rab11a	8787	8349	10334	10122	8511	8884
753	ENSMUSG00000004788	Eif2b2	7340	7524	5964	5772	7448	7116
754	ENSMUSG00000004789	Dlst	10358	11889	8542	8992	11788	10417
755	ENSMUSG00000004791	Pgf	13	7	18	5	6	8
756	ENSMUSG00000004798	Ulk2	3796	5203	2984	3094	4478	4269
757	ENSMUSG00000004814	Ccl24	0	0	2	0	0	0
758	ENSMUSG00000004815	Dgkq	480	780	653	540	799	632
759	ENSMUSG00000004821	Tmed11	0	0	0	0	0	0
760	ENSMUSG00000004837	Grap	9942	13242	9393	6836	9747	10815
761	ENSMUSG00000004842	Pou1f1	0	0	0	3	1	0
762	ENSMUSG00000004843	Chmp2b	4724	4492	4880	4502	4585	4648
763	ENSMUSG00000004846	Plod3	3041	2940	3707	3632	2619	2509
764	ENSMUSG00000004849	Ap1s1	7560	8096	6928	6660	8097	8470
765	ENSMUSG00000004864	Mapk13	14	8	11	8	19	10
766	ENSMUSG00000004865	Srpk1	12515	21655	14334	10534	19377	17020
767	ENSMUSG00000004872	Pax3	2	2	0	0	2	0
768	ENSMUSG00000004880	Lbr	32620	35771	19592	18885	33581	30948
769	ENSMUSG00000004885	Crabp2	2	14	860	1943	13	9
770	ENSMUSG00000004891	Nes	2	2	0	2	6	2
771	ENSMUSG00000004892	Bcan	0	0	0	0	0	0
772	ENSMUSG00000004894	Hapln2	0	0	0	0	1	0
773	ENSMUSG00000004895	Prcc	6193	7323	5674	5112	6651	6936
774	ENSMUSG00000004896	Rrnad1	846	1800	1697	949	1457	1112
775	ENSMUSG00000004897	Hdgf	46330	50133	48245	40372	49462	49873
776	ENSMUSG00000004902	Slc25a18	2	8	4	2	14	6
777	ENSMUSG00000004929	Thop1	4680	6064	4624	4390	6374	5617
778	ENSMUSG00000004931	Apba3	2600	2474	2673	1568	2459	2249
779	ENSMUSG00000004933	Matk	462	449	277	253	459	417
780	ENSMUSG00000004934	Pias4	3990	3687	3611	2593	3189	2968
781	ENSMUSG00000004936	Map2k1	15152	14474	15621	11514	14156	15203
782	ENSMUSG00000004937	Sgta	9734	12429	8079	8258	11017	10904
783	ENSMUSG00000004939	Nmrk2	3	4	3	4	11	3
784	ENSMUSG00000004945	Tmem242	5077	5323	4401	4047	5864	5742
785	ENSMUSG00000004947	Dtx2	1405	2007	1115	1030	1487	1771
786	ENSMUSG00000004948	Zp3	0	0	0	0	0	0
787	ENSMUSG00000004951	Hspb1	5	0	18	2	8	0
788	ENSMUSG00000004952	Rasa4	2470	1866	1345	1405	1878	1537
789	ENSMUSG00000004961	Syt5	63	61	116	64	64	60
790	ENSMUSG00000004980	Hnrnpa2b1	116612	145651	126213	119806	134166	139839
791	ENSMUSG00000004988	Fxyd4	5	15	10	17	22	7
792	ENSMUSG00000004994	Ccdc130	871	1272	1049	878	1077	1143
793	ENSMUSG00000004996	Mri1	4373	4491	4276	3126	4895	3790
794	ENSMUSG00000005034	Prkacb	26665	37956	18379	16371	29533	25610
795	ENSMUSG00000005043	Sgsh	1004	1771	327	208	1375	1104
796	ENSMUSG00000005045	Chd5	61	137	100	55	91	82
797	ENSMUSG00000005054	Cstb	7116	7087	7465	7210	8080	8241
798	ENSMUSG00000005057	Sh2b2	137	140	124	65	190	210
799	ENSMUSG00000005069	Pex5	2560	2342	3094	2530	2480	2617
800	ENSMUSG00000005078	Jkamp	1818	2297	2177	1821	1817	1975
801	ENSMUSG00000005087	Cd44	21320	17544	29120	34679	16811	16067
802	ENSMUSG00000005089	Slc1a2	28	39	29	20	30	26
803	ENSMUSG00000005102	Eif2ak4	3188	4118	3383	2289	4297	3682
804	ENSMUSG00000005103	Wdr1	76032	76771	76865	88670	76076	84028
805	ENSMUSG00000005107	Slc2a9	895	1014	393	601	863	762
806	ENSMUSG00000005124	Wisp1	117	0	30	26	0	2
807	ENSMUSG00000005125	Ndrg1	37062	26327	59011	59106	28403	30436
808	ENSMUSG00000005131	4930550C14Rik	48	51	42	34	58	53
809	ENSMUSG00000005142	Man2b1	17341	17383	16657	15073	16500	15459
810	ENSMUSG00000005148	Klf5	4	2	0	6	2	2
811	ENSMUSG00000005150	Wdr83	1580	2067	1479	1416	2009	1764
812	ENSMUSG00000005161	Prdx2	11515	12008	9529	10106	13582	12445
813	ENSMUSG00000005198	Polr2a	29005	31582	20803	17227	25016	21836
814	ENSMUSG00000005202	Shbg	0	0	0	0	0	0
815	ENSMUSG00000005204	Senp3	8214	9619	9470	8767	10172	9524
816	ENSMUSG00000005220	Corin	0	0	2	0	0	0
817	ENSMUSG00000005225	Plekha8	442	606	245	223	423	452
818	ENSMUSG00000005232	G6pc2	0	2	0	0	0	0
819	ENSMUSG00000005233	Spc25	4387	4187	3724	3184	4247	3981
820	ENSMUSG00000005237	Dnah2	2	4	3	2	3	0
821	ENSMUSG00000005251	Ripk4	40	15	89	46	20	26
822	ENSMUSG00000005262	Ufd1l	4011	5421	4011	4158	5175	5069
823	ENSMUSG00000005267	Zfp287	1184	1945	817	850	1528	1666
824	ENSMUSG00000005268	Prlr	0	0	0	0	2	0
825	ENSMUSG00000005299	Letm1	7187	9194	6035	5319	8907	8890
826	ENSMUSG00000005312	Ubqln1	21285	23345	22928	21838	22184	23351
827	ENSMUSG00000005320	Fgfr4	0	1	0	0	0	0
828	ENSMUSG00000005338	Cadm3	0	2	0	0	2	0
829	ENSMUSG00000005339	Fcer1a	0	0	0	0	0	0
830	ENSMUSG00000005354	Txn2	10893	13873	10490	11327	12954	13543
831	ENSMUSG00000005355	Casp14	0	0	0	0	0	0
832	ENSMUSG00000005357	Slc1a6	0	0	0	0	0	4
833	ENSMUSG00000005360	Slc1a3	2	0	2	2	1	0
834	ENSMUSG00000005362	Crbn	4200	4698	3712	3216	4462	4416
835	ENSMUSG00000005364	Il5ra	18	0	2	0	0	0
836	ENSMUSG00000005370	Msh6	18484	24928	13967	8176	21750	20810
837	ENSMUSG00000005371	Fbxo11	8411	9503	15394	16187	8050	8520
838	ENSMUSG00000005373	Mlxipl	9	4	7	5	7	10
839	ENSMUSG00000005374	Tbl2	8578	10354	8262	6037	10604	10498
840	ENSMUSG00000005378	Wbscr22	5170	5927	5343	4952	6447	6167
841	ENSMUSG00000005397	Nid1	435	356	282	272	327	314
842	ENSMUSG00000005410	Mcm5	33031	40122	23901	18042	35299	33388
843	ENSMUSG00000005413	Hmox1	3444	6151	4173	3805	5105	5779
844	ENSMUSG00000005417	Mprip	7282	8940	6620	5253	8342	7707
845	ENSMUSG00000005442	Cic	20082	22248	18152	13923	18778	18104
846	ENSMUSG00000005447	Pafah1b3	3952	2761	3535	2869	3176	3064
847	ENSMUSG00000005465	Il27ra	5583	4402	7268	4500	5000	4617
848	ENSMUSG00000005469	Prkaca	8561	7497	6722	5926	7366	7466
849	ENSMUSG00000005470	Asf1b	8314	9657	6031	4205	9333	8774
850	ENSMUSG00000005474	Myl10	357	371	300	367	362	436
851	ENSMUSG00000005481	Ddx39	18422	23134	18714	16606	23667	22336
852	ENSMUSG00000005483	Dnajb1	7078	10211	8129	8616	9255	9806
853	ENSMUSG00000005493	Msh4	1	5	0	7	10	4
854	ENSMUSG00000005501	Usp40	1165	1840	1463	1305	1751	1623
855	ENSMUSG00000005503	Evx1	0	0	2	2	0	0
856	ENSMUSG00000005505	Kbtbd4	801	1252	683	718	1123	1046
857	ENSMUSG00000005506	Celf1	14875	24305	14130	18547	20309	21037
858	ENSMUSG00000005510	Ndufs3	2789	3185	2744	2442	3384	3148
859	ENSMUSG00000005514	Por	12445	14925	10799	11362	12983	12691
860	ENSMUSG00000005533	Igf1r	523	277	395	309	315	340
861	ENSMUSG00000005534	Insr	2398	2202	1634	1954	2170	1912
862	ENSMUSG00000005540	Fcer2a	0	0	2	0	0	1
863	ENSMUSG00000005547	Cyp2a5	0	0	0	0	0	0
864	ENSMUSG00000005553	Atp4a	14	14	36	20	33	21
865	ENSMUSG00000005566	Trim28	34804	42811	24353	20868	39006	35585
866	ENSMUSG00000005575	Ube2m	17781	17575	22951	18168	17482	17102
867	ENSMUSG00000005580	Adcy9	42	37	9	10	48	41
868	ENSMUSG00000005583	Mef2c	32	39	7	31	29	15
869	ENSMUSG00000005609	Ctr9	8457	11054	5309	6279	9490	8765
870	ENSMUSG00000005610	Eif4g2	111504	169466	121280	136477	147770	157454
871	ENSMUSG00000005611	Mrvi1	263	449	108	129	383	216
872	ENSMUSG00000005615	Pcyt1a	4020	3677	9433	13003	3383	4412
873	ENSMUSG00000005621	Zfp592	6718	7948	6208	4675	6428	6045
874	ENSMUSG00000005625	Psmd4	13568	15871	13559	12454	16185	15844
875	ENSMUSG00000005628	Tmod4	3	46	0	7	12	16
876	ENSMUSG00000005640	Insrr	161	577	248	113	428	281
877	ENSMUSG00000005649	Cabp5	0	4	0	0	0	0
878	ENSMUSG00000005656	Snx6	8598	10119	7002	6713	9510	10177
879	ENSMUSG00000005667	Mthfd2	20152	19051	26609	21397	20285	18681
880	ENSMUSG00000005672	Kit	4881	3082	9432	3609	2924	2949
881	ENSMUSG00000005674	Tomm40l	646	728	554	547	872	744
882	ENSMUSG00000005677	Nr1i3	3	8	6	10	10	5
883	ENSMUSG00000005681	Apoa2	49	58	88	50	65	55
884	ENSMUSG00000005682	Pan2	2294	4263	2191	1878	3229	2634
885	ENSMUSG00000005683	Cs	53214	51277	47546	45842	50382	49494
886	ENSMUSG00000005686	Ampd3	19	14	1	6	19	17
887	ENSMUSG00000005687	Bcas2	7950	8741	7671	6637	8613	8626
888	ENSMUSG00000005696	Sh2d1a	2356	2112	1864	1408	2561	2162
889	ENSMUSG00000005698	Ctcf	19165	23958	15004	10836	20677	19399
890	ENSMUSG00000005699	Pard6a	870	730	902	501	817	762
891	ENSMUSG00000005705	Agrp	42	67	50	40	60	36
892	ENSMUSG00000005716	Pvalb	0	0	0	0	0	0
893	ENSMUSG00000005718	Tfap4	3146	5133	1894	1448	5620	3997
894	ENSMUSG00000005732	Ranbp1	30979	41249	33134	28981	41373	41778
895	ENSMUSG00000005763	Cd247	25998	29677	28114	36286	28479	30056
896	ENSMUSG00000005774	Rfx5	1783	2508	1392	798	2099	1970
897	ENSMUSG00000005779	Psmb4	16808	17071	15464	16154	18359	18422
898	ENSMUSG00000005800	Mmp8	0	0	0	0	0	0
899	ENSMUSG00000005802	Slc30a4	10223	11200	13696	14309	12306	12520
900	ENSMUSG00000005803	Sqrdl	145	170	109	235	166	174
901	ENSMUSG00000005804	Bloc1s6	4433	4768	3980	3696	4637	4521
902	ENSMUSG00000005813	Metap1	8337	9107	10421	10608	9084	8885
903	ENSMUSG00000005823	Gpr108	4867	5486	4565	4382	5241	4921
904	ENSMUSG00000005824	Tnfsf14	695	718	6080	11823	822	809
905	ENSMUSG00000005836	Gata6	0	0	0	0	0	2
906	ENSMUSG00000005846	Rsl1d1	27010	31866	28807	29972	35198	33439
907	ENSMUSG00000005864	Cnga2	0	0	0	0	0	0
908	ENSMUSG00000005871	Apc	6482	9252	5171	7056	7480	7973
909	ENSMUSG00000005873	Reep5	24320	22665	31423	23307	24014	23802
910	ENSMUSG00000005881	Ergic3	10021	10244	10005	9003	10088	9944
911	ENSMUSG00000005882	Uqcc1	2986	3830	2459	3134	4014	4178
912	ENSMUSG00000005883	Spo11	18	147	25	5	60	43
913	ENSMUSG00000005886	Ncoa2	10225	14086	10143	12340	11167	10131
914	ENSMUSG00000005891	Prl4a1	0	0	0	0	0	0
915	ENSMUSG00000005892	Trh	0	0	0	0	0	0
916	ENSMUSG00000005893	Nr2c2	5326	7819	3994	3113	6344	5949
917	ENSMUSG00000005897	Nr2c1	1191	1741	1023	916	1518	1424
918	ENSMUSG00000005899	Smpd4	5751	9123	4844	4015	7540	7165
919	ENSMUSG00000005907	Pex1	2082	1743	1831	1444	1904	1557
920	ENSMUSG00000005917	Otx1	2	4	60	2	4	2
921	ENSMUSG00000005936	Kctd20	6748	10001	3687	3334	8528	8159
922	ENSMUSG00000005947	Itgae	383	387	197	138	331	268
923	ENSMUSG00000005949	Ctns	936	1457	634	468	1288	1187
924	ENSMUSG00000005950	P2rx5	2	11	4	7	5	7
925	ENSMUSG00000005951	Shpk	467	586	280	129	603	493
926	ENSMUSG00000005952	Trpv1	0	0	0	0	0	0
927	ENSMUSG00000005958	Ephb3	0	0	0	2	0	0
928	ENSMUSG00000005968	Tuft1	305	253	385	230	237	240
929	ENSMUSG00000005973	Rcn1	5997	7184	5894	6416	6085	6519
930	ENSMUSG00000005980	Dnase1	43	305	67	29	217	184
931	ENSMUSG00000005981	Trap1	14794	14769	12086	10150	15399	13319
932	ENSMUSG00000005982	Naa60	3959	4154	3683	3066	4305	4000
933	ENSMUSG00000005983	1700037C18Rik	238	334	271	221	275	303
934	ENSMUSG00000005986	Ankrd13d	538	620	536	254	486	317
935	ENSMUSG00000005994	Tyrp1	0	0	0	0	0	0
936	ENSMUSG00000006005	Tpr	43430	59149	42531	33107	53922	48537
937	ENSMUSG00000006007	Pdc	0	0	0	0	0	0
938	ENSMUSG00000006010	BC003331	4411	4324	4332	3603	4417	4500
939	ENSMUSG00000006014	Prg4	2	13	13	8	1	4
940	ENSMUSG00000006019	Dhx34	1916	1587	1711	1080	1371	1261
941	ENSMUSG00000006021	Kptn	1862	1988	1573	1333	2108	1836
942	ENSMUSG00000006024	Napa	11024	12348	13035	10702	12236	11651
943	ENSMUSG00000006050	Sra1	8197	7862	9371	8057	7978	7614
944	ENSMUSG00000006056	Calcoco2	0	0	0	0	0	0
945	ENSMUSG00000006057	Atp5g1	2747	2960	3183	2918	3173	3153
946	ENSMUSG00000006058	Snf8	4087	4729	4133	4195	4440	4456
947	ENSMUSG00000006095	Tbcb	5423	6135	4928	4601	5862	5855
948	ENSMUSG00000006127	Inpp5k	4388	5595	2927	3530	4735	4468
949	ENSMUSG00000006134	Crkl	6863	8742	6304	5924	7238	7438
950	ENSMUSG00000006143	Upk3bl	0	1	0	0	0	1
951	ENSMUSG00000006154	Eps8l1	203	401	170	205	262	225
952	ENSMUSG00000006169	Clint1	17206	20585	15692	21729	19292	20154
953	ENSMUSG00000006179	Prss16	1266	1865	1741	776	1638	1555
954	ENSMUSG00000006191	Cdkal1	1639	1881	1650	992	1967	1939
955	ENSMUSG00000006200	Rhox6	0	0	0	0	0	0
956	ENSMUSG00000006204	5430419D17Rik	0	0	0	0	0	0
957	ENSMUSG00000006205	Htra1	0	0	0	0	1	0
958	ENSMUSG00000006215	Zbtb17	4219	3682	5664	4464	3591	3418
959	ENSMUSG00000006216	Clcnkb	0	0	0	3	0	0
960	ENSMUSG00000006218	Fam131c	0	0	0	0	0	0
961	ENSMUSG00000006219	Fblim1	5	12	3	0	4	2
962	ENSMUSG00000006221	Hspb7	2	0	4	12	2	1
963	ENSMUSG00000006235	Epor	56	52	299	91	34	76
964	ENSMUSG00000006241	Ccdc159	30	51	36	5	47	43
965	ENSMUSG00000006262	Mob1b	3422	4853	5072	7324	3884	4626
966	ENSMUSG00000006269	Atp6v1b1	6	1	2	2	4	0
967	ENSMUSG00000006270	Vax1	0	0	0	0	0	0
968	ENSMUSG00000006273	Atp6v1b2	9813	10863	8649	8491	10104	10305
969	ENSMUSG00000006276	Eps15l1	5293	6764	4989	4460	6023	5553
970	ENSMUSG00000006281	Tep1	8967	8111	7817	5585	8065	6204
971	ENSMUSG00000006288	Ttc5	1914	2236	1666	1589	2150	1917
972	ENSMUSG00000006289	Osgep	2189	2295	2004	1772	2400	2172
973	ENSMUSG00000006299	Aamp	9037	8916	7994	7322	8809	8615
974	ENSMUSG00000006301	Tmbim1	1177	1522	1536	1922	1739	1583
975	ENSMUSG00000006304	Arpc2	99315	104643	99016	102588	98893	102708
976	ENSMUSG00000006307	Kmt2b	15638	15401	23627	18167	13317	12905
977	ENSMUSG00000006310	Zbtb32	40209	30446	88471	77904	33559	34326
978	ENSMUSG00000006311	Etv2	0	1	0	1	2	0
979	ENSMUSG00000006313	Upk1a	379	517	563	602	464	588
980	ENSMUSG00000006315	Tmem147	3836	4170	3936	3401	4554	4145
981	ENSMUSG00000006333	Rps9	94877	95573	99928	93860	111444	106169
982	ENSMUSG00000006335	Tfpt	2070	2518	1695	1651	2385	2258
983	ENSMUSG00000006342	Susd2	29	94	33	30	43	28
984	ENSMUSG00000006344	Ggt5	12	31	19	15	30	20
985	ENSMUSG00000006345	Ggt1	1942	1999	2177	2074	2019	1958
986	ENSMUSG00000006356	Crip2	487	485	184	301	403	386
987	ENSMUSG00000006360	Crip1	16899	16435	9326	15871	17896	17869
988	ENSMUSG00000006362	Cbfa2t3	318	426	30	62	378	287
989	ENSMUSG00000006369	Fbln1	587	410	338	507	461	453
990	ENSMUSG00000006373	Pgrmc1	7236	8951	6397	6633	8994	8963
991	ENSMUSG00000006378	Gcat	6353	6111	5975	4782	6447	6020
992	ENSMUSG00000006386	Tek	0	2	0	0	0	0
993	ENSMUSG00000006389	Mpl	0	0	0	0	0	4
994	ENSMUSG00000006390	Elovl1	11581	14396	10480	11891	12327	12688
995	ENSMUSG00000006392	Med8	4398	5585	4447	3731	5446	5412
996	ENSMUSG00000006395	Hyi	472	568	483	284	644	409
997	ENSMUSG00000006398	Cdc20	11973	12585	7896	3909	11869	10460
998	ENSMUSG00000006403	Adamts4	11	11	31	28	10	8
999	ENSMUSG00000006411	Nectin4	4	22	5	4	16	4
1000	ENSMUSG00000006412	Pfdn2	4729	4557	5620	5725	5637	5438
1001	ENSMUSG00000006418	Rnf114	16046	14758	14644	13983	13989	14766
1002	ENSMUSG00000006423	C330007P06Rik	3519	4332	3522	3139	4059	3893
1003	ENSMUSG00000006435	Neurl1a	0	4	6	0	0	2
1004	ENSMUSG00000006442	Srm	11292	19087	11707	14878	19477	17823
1005	ENSMUSG00000006445	Epha2	376	335	831	867	295	284
1006	ENSMUSG00000006456	Rbm14	8088	11858	6664	7802	8857	9002
1007	ENSMUSG00000006457	Actn3	50	136	57	80	78	97
1008	ENSMUSG00000006462	A530013C23Rik	2	2	2	0	2	1
1009	ENSMUSG00000006463	Zdhhc24	1139	1566	1464	487	1660	1165
1010	ENSMUSG00000006464	Bbs1	155	184	95	131	148	121
1011	ENSMUSG00000006469	Slc34a3	0	0	0	0	0	0
1012	ENSMUSG00000006471	Ndor1	1840	7357	2318	1911	5587	4398
1013	ENSMUSG00000006476	Nsmf	1173	1425	1735	1374	1424	1185
1014	ENSMUSG00000006488	Prl7a1	0	0	0	0	0	0
1015	ENSMUSG00000006490	Prl8a9	0	0	0	0	0	0
1016	ENSMUSG00000006494	Pdk1	29069	26801	20146	20396	24115	23749
1017	ENSMUSG00000006498	Ptbp1	60878	65586	58527	61624	58809	58661
1018	ENSMUSG00000006517	Mvd	9863	9469	8087	5168	10121	9042
1019	ENSMUSG00000006519	Cyba	21382	21342	26692	20994	24168	22721
1020	ENSMUSG00000006522	Itih3	0	0	0	0	0	0
1021	ENSMUSG00000006526	Tmem110	1582	1458	1103	796	1365	1342
1022	ENSMUSG00000006527	Sfmbt1	1458	2466	1702	1649	2195	2376
1023	ENSMUSG00000006529	Itih1	0	0	0	0	0	0
1024	ENSMUSG00000006538	Ihh	0	2	0	0	10	2
1025	ENSMUSG00000006542	Prkag3	0	0	0	2	0	0
1026	ENSMUSG00000006546	Cryba2	0	0	0	0	0	0
1027	ENSMUSG00000006567	Atp7b	322	498	531	152	342	440
1028	ENSMUSG00000006570	Defb2	0	0	0	0	0	0
1029	ENSMUSG00000006574	Slc4a1	0	0	0	1	0	0
1030	ENSMUSG00000006575	Rundc3a	81	166	73	66	143	121
1031	ENSMUSG00000006576	Slc4a3	7	2	0	4	9	7
1032	ENSMUSG00000006585	Cdt1	8336	9730	6441	4267	8700	7459
1033	ENSMUSG00000006586	Runx1t1	0	0	0	0	2	0
1034	ENSMUSG00000006587	Snai3	1104	1593	2010	1088	1422	1317
1035	ENSMUSG00000006589	Aprt	12491	13567	11380	12412	15123	14356
1036	ENSMUSG00000006599	Gtf2h1	8893	12127	10271	10491	12669	12506
1037	ENSMUSG00000006611	Hfe	97	87	36	58	93	58
1038	ENSMUSG00000006638	Abhd1	2	10	9	2	6	5
1039	ENSMUSG00000006641	Slc5a6	286	458	205	323	532	401
1040	ENSMUSG00000006642	Tcf23	0	0	0	0	0	0
1041	ENSMUSG00000006649	Nphs1	17	12	24	25	25	28
1042	ENSMUSG00000006651	Aplp1	1368	499	1546	1063	572	643
1043	ENSMUSG00000006673	Qrich1	14734	16929	13742	14359	15074	15394
1044	ENSMUSG00000006675	P4htm	234	429	235	202	382	290
1045	ENSMUSG00000006676	Usp19	11457	14126	11627	10552	11734	10885
1046	ENSMUSG00000006678	Pola1	7999	7186	7254	5573	7558	6800
1047	ENSMUSG00000006699	Cdc42	74477	79357	70995	70240	75292	79084
1048	ENSMUSG00000006705	Pknox1	4987	6367	5076	5472	5480	5914
1049	ENSMUSG00000006711	D130043K22Rik	0	0	0	3	1	2
1050	ENSMUSG00000006715	Gmnn	5549	6131	4035	2152	6578	6050
1051	ENSMUSG00000006717	Acot13	2796	2627	2159	2669	2820	2847
1052	ENSMUSG00000006720	Zfp184	12	13	39	16	43	32
1053	ENSMUSG00000006724	Cyp27b1	13	42	6	9	26	12
1054	ENSMUSG00000006728	Cdk4	29703	32534	27774	24228	34921	33328
1055	ENSMUSG00000006731	B4galnt1	31733	47645	44916	38981	38681	38374
1056	ENSMUSG00000006732	Mettl1	1747	3140	1984	1812	2931	2758
1057	ENSMUSG00000006736	Tspan31	5978	6004	6894	4408	6453	6018
1058	ENSMUSG00000006740	Kif5b	24859	27074	23623	26933	23588	26756
1059	ENSMUSG00000006763	Saal1	3697	3471	2764	2621	3709	3542
1060	ENSMUSG00000006764	Tph2	0	0	0	0	0	0
1061	ENSMUSG00000006777	Krt23	0	0	0	0	0	0
1062	ENSMUSG00000006782	Cnp	11349	11837	7910	6971	10904	10636
1063	ENSMUSG00000006784	Ttc25	43	32	39	31	40	39
1064	ENSMUSG00000006800	Sulf2	99	224	258	58	161	153
1065	ENSMUSG00000006818	Sod2	8161	9239	6990	7928	9766	9271
1066	ENSMUSG00000006850	Tmco6	1624	1532	1474	916	1552	1314
1067	ENSMUSG00000006906	Stambp	3302	2575	2888	2600	2632	2550
1068	ENSMUSG00000006920	Ezh1	5015	6614	4492	2962	5232	4703
1069	ENSMUSG00000006930	Hap1	31	30	6	4	19	12
1070	ENSMUSG00000006931	P3h4	62	56	119	49	54	59
1071	ENSMUSG00000006932	Ctnnb1	25196	40036	25960	25525	33401	36225
1072	ENSMUSG00000006941	Eif1b	5357	8331	5914	5869	6418	6620
1073	ENSMUSG00000006948	Klk4	0	0	0	0	0	0
1074	ENSMUSG00000006958	Chrd	0	0	0	0	0	0
1075	ENSMUSG00000006998	Psmd2	28180	29171	28478	26259	29110	29541
1076	ENSMUSG00000007021	Syngr3	166	149	215	99	131	168
1077	ENSMUSG00000007029	Vars	50402	41817	37265	29820	41794	35634
1078	ENSMUSG00000007030	Vwa7	9	24	16	11	19	11
1079	ENSMUSG00000007033	Hspa1l	5	13	8	14	27	15
1080	ENSMUSG00000007034	Slc44a4	0	1	0	0	1	0
1081	ENSMUSG00000007035	Msh5	246	366	263	163	332	263
1082	ENSMUSG00000007036	Abhd16a	3946	4783	4728	3456	4241	4183
1083	ENSMUSG00000007038	Neu1	1933	2217	2296	1247	2810	2373
1084	ENSMUSG00000007039	Ddah2	658	471	633	391	514	456
1085	ENSMUSG00000007041	Clic1	70190	71000	65752	64108	74526	76303
1086	ENSMUSG00000007050	Lsm2	4273	6247	3847	3468	5665	5336
1087	ENSMUSG00000007080	Pole	10311	12199	7305	5448	11707	8716
1088	ENSMUSG00000007097	Atp1a2	29	40	11	12	38	28
1089	ENSMUSG00000007107	Atp1a4	2	0	0	0	0	0
1090	ENSMUSG00000007122	Casq1	0	9	2	4	8	12
1091	ENSMUSG00000007207	Stx1a	177	360	217	60	331	192
1092	ENSMUSG00000007209	Ceacam9	0	0	1	0	0	0
1093	ENSMUSG00000007216	Zfp775	865	647	489	374	691	684
1094	ENSMUSG00000007279	Scube2	0	0	0	0	0	0
1095	ENSMUSG00000007338	Mrpl49	3204	5795	2824	2350	5151	5014
1096	ENSMUSG00000007379	Dennd2c	714	1170	937	1012	963	917
1097	ENSMUSG00000007411	Mark3	4698	6456	5064	5594	6248	6240
1098	ENSMUSG00000007415	Gatad1	10515	9530	8573	8662	9383	9468
1099	ENSMUSG00000007440	Pcdha11	0	0	0	0	0	0
1100	ENSMUSG00000007457	2310003L06Rik	0	0	0	0	0	0
1101	ENSMUSG00000007458	M6pr	27656	31548	49479	44871	31650	31869
1102	ENSMUSG00000007476	Lrrc8a	590	1128	340	329	771	822
1103	ENSMUSG00000007480	Mc5r	4	0	0	0	0	0
1104	ENSMUSG00000007564	Ppp2r1a	30033	27532	26234	27198	27000	27135
1105	ENSMUSG00000007570	Fance	1426	1773	1395	782	1739	1615
1106	ENSMUSG00000007589	Tinf2	3972	3583	4616	3340	3955	3842
1107	ENSMUSG00000007591	Tssk4	24	58	36	26	48	26
1108	ENSMUSG00000007594	Hapln4	50	74	65	33	79	64
1109	ENSMUSG00000007603	Dus3l	1971	4458	1879	1617	3495	2756
1110	ENSMUSG00000007610	Gtpbp3	1518	2224	1439	900	2360	2011
1111	ENSMUSG00000007613	Tgfbr1	3677	6074	1206	1305	4703	4409
1112	ENSMUSG00000007617	Homer1	1375	1750	3186	4342	1694	1797
1113	ENSMUSG00000007646	Rad51c	708	657	521	312	670	665
1114	ENSMUSG00000007653	Gabrb2	0	0	0	0	0	0
1115	ENSMUSG00000007655	Cav1	2	0	0	2	0	0
1116	ENSMUSG00000007656	Arpp19	9494	11705	12130	10055	11985	13122
1117	ENSMUSG00000007659	Bcl2l1	18639	7345	24034	26316	8142	7760
1118	ENSMUSG00000007670	Khsrp	22248	29325	20414	17564	25877	23264
1119	ENSMUSG00000007682	Dio2	60	165	2	11	107	109
1120	ENSMUSG00000007721	Ccdc124	7090	7932	8532	7719	7550	8097
1121	ENSMUSG00000007739	Cct4	39631	41242	38769	37092	45057	41632
1122	ENSMUSG00000007777	0610009B22Rik	650	878	588	530	792	792
1123	ENSMUSG00000007783	Cpt1c	31	56	13	12	17	17
1124	ENSMUSG00000007805	Twist2	0	0	0	0	0	0
1125	ENSMUSG00000007812	Zfp655	3386	4603	4212	4367	4248	4316
1126	ENSMUSG00000007815	Rhoa	47223	43666	45549	43553	42134	42476
1127	ENSMUSG00000007817	Zmiz1	48801	57124	62196	59027	42601	42851
1128	ENSMUSG00000007827	Ankrd26	1370	2530	1537	1180	2245	1990
1129	ENSMUSG00000007833	Aldh16a1	2892	3092	2658	2342	3010	2656
1130	ENSMUSG00000007836	Hnrnpa0	23481	31295	23191	23865	28525	27961
1131	ENSMUSG00000007837	Prrg2	222	247	166	174	225	204
1132	ENSMUSG00000007850	Hnrnph1	28917	44659	38159	28088	39203	37236
1133	ENSMUSG00000007867	Ift43	186	170	140	160	204	215
1134	ENSMUSG00000007872	Id3	537	686	170	57	569	334
1135	ENSMUSG00000007877	Tcap	0	2	2	4	2	4
1136	ENSMUSG00000007880	Arid1a	26029	35647	25595	27775	27971	25880
1137	ENSMUSG00000007888	Crlf1	6	3	2	5	6	5
1138	ENSMUSG00000007891	Ctsd	42512	48670	67010	41319	46267	49404
1139	ENSMUSG00000007892	Rplp1	111020	105820	113085	108937	110453	117229
1140	ENSMUSG00000007907	Cabs1	0	0	0	0	0	0
1141	ENSMUSG00000007908	Hmgcll1	7	0	0	0	0	0
1142	ENSMUSG00000007944	Ttc9b	4	0	2	1	0	0
1143	ENSMUSG00000007946	Phox2a	0	0	4	0	0	0
1144	ENSMUSG00000007950	Abhd8	4321	3479	2643	2322	3834	3758
1145	ENSMUSG00000007987	Ift22	551	584	636	519	581	657
1146	ENSMUSG00000007989	Fzd3	0	4	0	3	0	2
1147	ENSMUSG00000008028	1700008O03Rik	2	1	3	2	0	3
1148	ENSMUSG00000008035	Mid1ip1	4471	4716	4694	3266	4444	4704
1149	ENSMUSG00000008036	Ap2s1	13544	13085	14201	12227	13423	13803
1150	ENSMUSG00000008090	Fgfrl1	123	52	173	124	106	68
1151	ENSMUSG00000008129	4930432K21Rik	278	310	127	77	297	257
1152	ENSMUSG00000008136	Fhl2	2859	2668	5290	4976	2427	2531
1153	ENSMUSG00000008140	Emc10	10252	10138	9463	8413	9636	9320
1154	ENSMUSG00000008153	Clstn3	47	13	69	19	4	7
1155	ENSMUSG00000008167	Fbxw9	541	574	655	455	570	471
1156	ENSMUSG00000008193	Spib	28	12	4	0	4	2
1157	ENSMUSG00000008200	Fnbp4	12098	19220	14447	8516	16689	14141
1158	ENSMUSG00000008206	Cers4	2269	1917	1635	1288	1740	1532
1159	ENSMUSG00000008226	Scrn3	503	516	337	219	438	503
1160	ENSMUSG00000008301	Phax	5228	6030	4778	5218	5832	5910
1161	ENSMUSG00000008305	Tle1	1949	2695	1504	2470	2362	2419
1162	ENSMUSG00000008307	1700109H08Rik	224	250	361	285	269	123
1163	ENSMUSG00000008318	Relt	2410	2188	3325	2305	2300	2125
1164	ENSMUSG00000008333	Snrpb2	8081	8582	8310	8317	9394	9505
1165	ENSMUSG00000008348	Ubc	63000	76875	64423	63957	62529	68495
1166	ENSMUSG00000008373	Prpf31	10125	13195	9245	9247	13642	12293
1167	ENSMUSG00000008384	Sertad1	7210	7200	6466	5216	7188	8100
1168	ENSMUSG00000008393	Carhsp1	3466	4490	2384	2344	3482	3936
1169	ENSMUSG00000008398	Elk3	11458	14776	12887	11808	12484	12204
1170	ENSMUSG00000008429	Herpud2	4174	5907	4049	3268	4779	4814
1171	ENSMUSG00000008435	Rdh13	1302	1746	1350	1763	2000	1724
1172	ENSMUSG00000008438	Adam21	0	4	0	0	0	0
1173	ENSMUSG00000008450	Nutf2	3121	3953	2920	2989	4135	3844
1174	ENSMUSG00000008461	Fut1	0	4	0	2	4	2
1175	ENSMUSG00000008475	Arpc5	57471	62020	60513	60668	61687	65848
1176	ENSMUSG00000008482	Rnf151	3	5	16	12	9	0
1177	ENSMUSG00000008489	Elavl2	2	0	0	0	0	0
1178	ENSMUSG00000008496	Pou2f2	791	2154	6576	3727	1218	1228
1179	ENSMUSG00000008540	Mgst1	0	0	0	0	0	0
1180	ENSMUSG00000008575	Nfib	0	0	0	0	2	0
1181	ENSMUSG00000008590	Htr3b	0	0	0	0	0	0
1182	ENSMUSG00000008601	Rab25	13	11	7	10	7	13
1183	ENSMUSG00000008604	Ubqln4	7467	10364	6498	5735	10245	9470
1184	ENSMUSG00000008658	Rbfox1	22	0	2	0	0	0
1185	ENSMUSG00000008668	Rps18	26547	29535	29970	28323	36608	29860
1186	ENSMUSG00000008682	Rpl10	12218	11812	14418	11050	11364	10925
1187	ENSMUSG00000008683	Rps15a	20161	20685	24057	21690	23241	23769
1188	ENSMUSG00000008690	Ncaph2	24068	19802	20709	16890	20465	19392
1189	ENSMUSG00000008730	Hipk1	17894	24466	16221	19926	19694	20057
1190	ENSMUSG00000008734	Gprc5b	2	2	2	0	0	0
1191	ENSMUSG00000008763	Man1a2	7885	13705	7377	8900	11494	12215
1192	ENSMUSG00000008789	Ceacam5	0	0	0	0	0	0
1193	ENSMUSG00000008813	Tppp2	4	0	2	3	0	1
1194	ENSMUSG00000008822	Acyp1	816	664	642	572	808	886
1195	ENSMUSG00000008843	Cldn13	0	0	0	0	0	0
1196	ENSMUSG00000008845	Cd163	2	4	4	8	8	4
1197	ENSMUSG00000008855	Hdac5	3429	3316	2094	1957	3256	2687
1198	ENSMUSG00000008859	Rala	9335	8232	9229	8731	8505	9129
1199	ENSMUSG00000008874	Clec3a	0	0	0	0	0	0
1200	ENSMUSG00000008892	Vdac3	4207	4376	3599	3535	4374	4443
1201	ENSMUSG00000008932	Slc1a7	0	0	0	0	0	0
1202	ENSMUSG00000008958	Vps72	4695	5559	3837	2884	4943	4704
1203	ENSMUSG00000008976	Gabpa	13570	16075	13255	14684	14036	14994
1204	ENSMUSG00000008999	Bmp7	70	28	21	7	25	24
1205	ENSMUSG00000009013	Dynll1	12120	18877	11186	10555	17429	18298
1206	ENSMUSG00000009030	Pdcl	5102	6130	3133	3320	4897	5156
1207	ENSMUSG00000009035	Tmem184b	9470	10079	7262	6439	8859	8681
1208	ENSMUSG00000009047	Gm5965	0	0	0	0	0	0
1209	ENSMUSG00000009070	Rsph14	0	0	0	0	0	0
1210	ENSMUSG00000009073	Nf2	10697	14913	8212	9307	13738	13647
1211	ENSMUSG00000009075	Cabp7	0	4	1	0	1	3
1212	ENSMUSG00000009076	Zmat5	1101	1229	986	1095	1210	1326
1213	ENSMUSG00000009079	Ewsr1	27816	36997	27020	28519	32550	30715
1214	ENSMUSG00000009090	Ap1b1	8222	9688	6693	6836	9097	8505
1215	ENSMUSG00000009092	Derl3	29	59	29	16	24	25
1216	ENSMUSG00000009093	Gstt4	6	0	0	0	5	2
1217	ENSMUSG00000009097	Tbx1	0	0	0	0	0	0
1218	ENSMUSG00000009108	Gnat2	36	31	11	1	47	33
1219	ENSMUSG00000009112	Bcl2l13	8367	8933	7418	6979	8387	8532
1220	ENSMUSG00000009114	2610028H24Rik	0	0	2	0	0	0
1221	ENSMUSG00000009115	Spatc1l	17	35	9	26	36	19
1222	ENSMUSG00000009145	Dqx1	65	258	145	92	293	135
1223	ENSMUSG00000009185	Ccl8	0	0	0	0	0	0
1224	ENSMUSG00000009207	Lnp	3766	4708	4075	3623	4541	4635
1225	ENSMUSG00000009210	Prr29	1	7	1	1	3	3
1226	ENSMUSG00000009214	Tmem8c	0	0	0	0	0	0
1227	ENSMUSG00000009216	Fam163b	0	0	0	0	0	0
1228	ENSMUSG00000009246	Trpm5	1	0	0	1	0	0
1229	ENSMUSG00000009248	Ascl2	0	2	0	0	2	0
1230	ENSMUSG00000009281	Rarres2	0	4	0	0	0	0
1231	ENSMUSG00000009291	Pttg1ip	4650	6217	5170	6829	5186	5296
1232	ENSMUSG00000009292	Trpm2	44	41	24	21	26	34
1233	ENSMUSG00000009293	Ube2g2	4681	5766	5082	5689	5714	5787
1234	ENSMUSG00000009350	Mpo	0	2	0	0	0	0
1235	ENSMUSG00000009356	Lpo	0	0	0	2	0	0
1236	ENSMUSG00000009376	Met	20	103	23	3	32	47
1237	ENSMUSG00000009378	Slc16a12	2	4	0	0	0	0
1238	ENSMUSG00000009394	Syn2	5	9	7	0	9	3
1239	ENSMUSG00000009406	Elk1	2193	2221	3563	4259	2162	2324
1240	ENSMUSG00000009418	Nav1	812	770	1617	896	639	352
1241	ENSMUSG00000009470	Tnpo1	27217	43088	19799	22705	34897	36993
1242	ENSMUSG00000009471	Myod1	0	0	0	0	0	0
1243	ENSMUSG00000009487	Otog	0	0	0	0	1	0
1244	ENSMUSG00000009535	Rnmt	5246	5661	4832	4597	6084	6003
1245	ENSMUSG00000009545	Kcnq1	0	0	0	0	0	0
1246	ENSMUSG00000009549	Srp14	11724	12765	13208	12822	13007	13340
1247	ENSMUSG00000009551	6330409D20Rik	28	69	44	21	45	25
1248	ENSMUSG00000009555	Cdk9	9586	9659	8570	8504	9213	8989
1249	ENSMUSG00000009563	Tor2a	4062	4279	2691	2669	4613	4316
1250	ENSMUSG00000009566	Fpgs	2520	3842	1655	1866	4022	3478
1251	ENSMUSG00000009569	Mkl2	2031	3686	867	1357	2640	2471
1252	ENSMUSG00000009575	Cbx5	25707	32204	18795	15863	29792	27641
1253	ENSMUSG00000009580	Odam	0	0	0	0	0	0
1254	ENSMUSG00000009585	Apobec3	30400	29313	24050	15319	28959	28327
1255	ENSMUSG00000009588	St6galnac1	0	0	0	0	0	0
1256	ENSMUSG00000009596	Taf7l	0	0	0	2	3	2
1257	ENSMUSG00000009614	Sardh	3	0	0	0	0	0
1258	ENSMUSG00000009621	Vav2	881	1132	680	418	1083	1055
1259	ENSMUSG00000009628	Tex15	868	1243	625	393	1223	983
1260	ENSMUSG00000009630	Ppp2cb	9635	12361	8183	9636	11240	11397
1261	ENSMUSG00000009633	G0s2	6	7	22	11	8	6
1262	ENSMUSG00000009640	Dmap1	1918	2074	1527	1256	2125	1895
1263	ENSMUSG00000009646	Pla2g12b	0	0	0	0	0	0
1264	ENSMUSG00000009647	Mcu	2295	2654	1898	1732	2572	2427
1265	ENSMUSG00000009654	Oit3	740	803	1080	426	688	574
1266	ENSMUSG00000009670	Tex11	0	0	8	2	0	0
1267	ENSMUSG00000009681	Bcr	19241	15729	33012	26673	15910	16531
1268	ENSMUSG00000009687	Fxyd5	133087	140049	172951	153590	137994	144386
1269	ENSMUSG00000009731	Kcnd1	20	64	57	38	47	50
1270	ENSMUSG00000009733	Tfcp2	407	669	327	184	584	530
1271	ENSMUSG00000009734	Pou6f2	0	0	0	0	0	0
1272	ENSMUSG00000009739	Pou6f1	46	43	74	45	38	23
1273	ENSMUSG00000009741	Ubp1	5123	9700	6965	5157	7478	6600
1274	ENSMUSG00000009772	Nuak2	85	67	18	28	63	70
1275	ENSMUSG00000009828	Ick	850	1429	557	540	1172	1135
1276	ENSMUSG00000009863	Sdhb	18856	18954	15139	15971	19918	20768
1277	ENSMUSG00000009876	Cox4i2	249	172	59	169	169	183
1278	ENSMUSG00000009894	Snap47	3671	2980	2675	1843	3319	2945
1279	ENSMUSG00000009900	Wnt3a	0	0	0	0	0	0
1280	ENSMUSG00000009905	Kdsr	1678	2010	899	1073	1903	1650
1281	ENSMUSG00000009907	Vps4b	13458	15617	11423	13790	13837	14941
1282	ENSMUSG00000009927	Rps25	13930	13966	15655	14153	16360	15590
1283	ENSMUSG00000009941	Nxf2	258	170	100	134	173	225
1284	ENSMUSG00000009995	Taz	1311	2149	1382	964	2083	1420
1285	ENSMUSG00000010021	Kif19a	132	145	97	85	144	108
1286	ENSMUSG00000010025	Aldh3a2	3360	5395	2376	2051	4308	4439
1287	ENSMUSG00000010044	Zmynd10	73	234	205	119	156	173
1288	ENSMUSG00000010045	Tmem115	2878	3485	3020	3754	3022	3074
1289	ENSMUSG00000010047	Hyal2	880	1168	985	1232	1161	1085
1290	ENSMUSG00000010048	Ifrd2	3333	5136	2805	3280	6012	4445
1291	ENSMUSG00000010051	Hyal1	15	24	17	11	20	13
1292	ENSMUSG00000010054	Tusc2	1095	1478	1274	1391	1461	1238
1293	ENSMUSG00000010057	Nprl2	1612	2352	1714	1326	2247	2306
1294	ENSMUSG00000010064	Slc38a3	0	0	0	0	0	0
1295	ENSMUSG00000010066	Cacna2d2	187	172	53	51	183	187
1296	ENSMUSG00000010067	Rassf1	4034	4418	6244	3785	4340	4553
1297	ENSMUSG00000010080	Epn3	0	0	0	0	0	0
1298	ENSMUSG00000010086	Rnf112	0	0	0	0	0	0
1299	ENSMUSG00000010095	Slc3a2	43997	40338	51432	42108	41063	37461
1300	ENSMUSG00000010097	Nxf1	11545	17357	16096	11035	16025	14076
1301	ENSMUSG00000010110	Stx5a	4169	5593	3351	3082	4560	4495
1302	ENSMUSG00000010122	Slc47a1	0	0	0	0	0	0
1303	ENSMUSG00000010136	Pifo	0	1	1	2	2	4
1304	ENSMUSG00000010142	Tnfrsf13b	7564	6096	3647	4507	6155	5245
1305	ENSMUSG00000010154	Spire2	26	31	16	13	3	17
1306	ENSMUSG00000010175	Prox1	0	0	0	0	0	0
1307	ENSMUSG00000010205	Raver1	22348	31128	18258	18877	25621	25040
1308	ENSMUSG00000010277	2610507B11Rik	37005	35278	29446	27078	36001	33762
1309	ENSMUSG00000010290	AI597479	3013	3324	4198	3188	3316	3344
1310	ENSMUSG00000010307	Tmem86a	107	73	33	19	107	63
1311	ENSMUSG00000010311	Optc	4	14	0	0	12	20
1312	ENSMUSG00000010342	Tex14	6	3	11	16	15	10
1313	ENSMUSG00000010358	Ifi35	3649	4628	2292	2577	4651	4333
1314	ENSMUSG00000010362	Rdm1	1688	1455	1183	1128	1662	1524
1315	ENSMUSG00000010376	Nedd8	9904	11372	11187	10406	11270	11770
1316	ENSMUSG00000010392	Gosr1	6343	8490	5236	6159	6370	7131
1317	ENSMUSG00000010406	Mrpl52	3047	3382	3846	3056	3844	4002
1318	ENSMUSG00000010435	Spaca7	0	0	0	0	0	0
1319	ENSMUSG00000010453	Kansl3	5886	8208	8282	6510	7079	6842
1320	ENSMUSG00000010461	Eya4	0	0	0	0	0	0
1321	ENSMUSG00000010476	Ebf3	0	0	0	0	0	0
1322	ENSMUSG00000010492	Uckl1os	16	86	11	17	41	33
1323	ENSMUSG00000010505	Myt1	2	0	0	0	0	0
1324	ENSMUSG00000010517	Faf1	8713	8179	7401	5683	8974	8603
1325	ENSMUSG00000010529	Gm266	0	0	2	2	0	0
1326	ENSMUSG00000010538	Tsacc	45	72	57	40	68	58
1327	ENSMUSG00000010554	Mettl16	6052	8922	7020	7289	8742	8964
1328	ENSMUSG00000010592	Dazl	31	40	19	7	19	37
1329	ENSMUSG00000010601	Apol7a	4	16	7	2	6	4
1330	ENSMUSG00000010607	Pigyl	1002	984	686	496	992	920
1331	ENSMUSG00000010608	Rbm25	21720	33101	29183	20095	32590	31178
1332	ENSMUSG00000010609	Psen2	1718	2394	1008	1038	2168	1970
1333	ENSMUSG00000010651	Acaa1b	362	377	350	334	352	306
1334	ENSMUSG00000010660	Plcd1	222	193	28	51	171	241
1335	ENSMUSG00000010663	Fads1	6379	8448	4090	3315	7270	7154
1336	ENSMUSG00000010721	Lmbr1	117	212	94	63	170	172
1337	ENSMUSG00000010751	Tnfrsf22	1343	4087	731	862	3002	2864
1338	ENSMUSG00000010755	Cars	12236	13715	15676	9487	12786	10532
1339	ENSMUSG00000010760	Phlda2	0	4	0	0	0	0
1340	ENSMUSG00000010796	Asz1	0	0	0	0	0	0
1341	ENSMUSG00000010797	Wnt2	0	0	0	0	0	0
1342	ENSMUSG00000010803	Gabra1	0	0	0	0	0	0
1343	ENSMUSG00000010825	Grid2ip	4	7	0	0	2	0
1344	ENSMUSG00000010830	Kdelr3	145	124	157	99	116	162
1345	ENSMUSG00000010841	1700006E09Rik	0	0	0	0	1	0
1346	ENSMUSG00000010911	Apip	1639	1955	1671	1347	2006	1967
1347	ENSMUSG00000010914	Pdhx	2296	2774	2051	2194	2789	2748
1348	ENSMUSG00000010936	Vac14	5858	9052	4931	4512	7993	7481
1349	ENSMUSG00000011008	Mcoln2	878	2079	434	798	1653	1342
1350	ENSMUSG00000011034	Slc5a1	0	0	0	0	0	0
1351	ENSMUSG00000011052	1700049J03Rik	1	0	0	0	0	0
1352	ENSMUSG00000011096	Akt1s1	1633	2923	1425	1666	2359	2183
1353	ENSMUSG00000011114	Tbrg1	12472	11959	13563	9420	13085	12500
1354	ENSMUSG00000011118	Panx3	0	2	1	0	0	0
1355	ENSMUSG00000011148	Adssl1	2750	2058	2643	3073	2115	1980
1356	ENSMUSG00000011154	Cfap161	0	0	1	0	0	0
1357	ENSMUSG00000011158	Brf1	3160	5387	2718	2629	4611	4378
1358	ENSMUSG00000011171	Vipr2	28	80	11	9	52	45
1359	ENSMUSG00000011179	Odc1	37300	36967	82362	46758	41415	41273
1360	ENSMUSG00000011254	Thg1l	2885	5200	2157	2632	4189	4340
1361	ENSMUSG00000011256	Adam19	29386	28926	22415	18741	27121	23770
1362	ENSMUSG00000011257	Pabpc4	7640	14062	8217	8938	11814	11805
1363	ENSMUSG00000011263	Exoc3l2	8	19	14	12	13	9
1364	ENSMUSG00000011267	Zfp296	579	514	627	973	492	476
1365	ENSMUSG00000011305	Plin5	2	1	0	0	0	0
1366	ENSMUSG00000011306	Sugp1	5319	5888	4485	4178	5329	5078
1367	ENSMUSG00000011349	Dmrtc2	2	0	0	0	1	0
1368	ENSMUSG00000011350	Gm5893	2	2	7	4	5	1
1369	ENSMUSG00000011382	Dhdh	1880	1562	1345	1295	1544	1505
1370	ENSMUSG00000011427	Zfp790	1377	1773	1874	2199	1526	1709
1371	ENSMUSG00000011463	Cpb1	1	2	1	0	5	0
1372	ENSMUSG00000011486	Slc25a41	0	2	0	0	0	0
1373	ENSMUSG00000011589	Fsd1	0	0	0	0	0	0
1374	ENSMUSG00000011632	Pinlyp	0	0	0	0	0	0
1375	ENSMUSG00000011658	Fuz	453	673	546	414	628	475
1376	ENSMUSG00000011751	Sptbn4	29	28	10	10	32	17
1377	ENSMUSG00000011752	Pgam1	67986	53930	65859	65140	54954	58934
1378	ENSMUSG00000011831	Evi5	257	548	133	122	432	399
1379	ENSMUSG00000011832	Evi5l	2393	1866	1951	1726	1807	2007
1380	ENSMUSG00000011837	Snapc2	2266	2325	1875	1691	2118	2135
1381	ENSMUSG00000011877	Git1	9157	11465	8121	9390	10765	10181
1382	ENSMUSG00000011884	Gltp	15210	16811	14150	12374	14432	15358
1383	ENSMUSG00000011958	Bnip2	10863	13604	12812	12083	13067	14133
1384	ENSMUSG00000011960	Ccnt1	6958	8316	10491	10508	7379	7134
1385	ENSMUSG00000012017	Scarf2	15	26	6	2	6	11
1386	ENSMUSG00000012042	4930579F01Rik	0	0	0	0	0	0
1387	ENSMUSG00000012076	Brms1l	886	2267	811	609	1873	1773
1388	ENSMUSG00000012114	Med15	12076	13600	11764	9758	12340	11815
1389	ENSMUSG00000012117	Dhdds	4589	6979	3547	4088	5838	5816
1390	ENSMUSG00000012123	Aim1l	897	873	811	612	1041	722
1391	ENSMUSG00000012126	Ubxn11	608	1289	780	581	1211	957
1392	ENSMUSG00000012187	Mogat1	0	0	0	1	0	2
1393	ENSMUSG00000012211	Tex22	2	0	4	0	0	0
1394	ENSMUSG00000012282	Wnt8a	4	5	1	2	8	10
1395	ENSMUSG00000012296	Tjap1	2972	3573	4870	3623	2932	3034
1396	ENSMUSG00000012350	Ehf	16	0	1	0	0	0
1397	ENSMUSG00000012396	Nanog	0	0	2	1	0	0
1398	ENSMUSG00000012405	Rpl15	16557	16767	18337	15987	17429	20755
1399	ENSMUSG00000012422	Tmem167	7405	9561	7867	8134	9543	9468
1400	ENSMUSG00000012428	Steap4	0	0	0	0	0	0
1401	ENSMUSG00000012429	Mplkip	3040	2175	2490	2140	2449	2338
1402	ENSMUSG00000012443	Kif11	22813	29362	15571	10738	24156	22277
1403	ENSMUSG00000012483	Rpa3	2230	2218	2209	2187	2573	2415
1404	ENSMUSG00000012519	Mlkl	4971	6980	3456	3929	6443	6402
1405	ENSMUSG00000012520	Phox2b	0	0	0	0	0	0
1406	ENSMUSG00000012535	Tnpo3	17739	22680	15672	15573	20539	20961
1407	ENSMUSG00000012609	Ttll5	2939	4332	3132	2048	3362	3172
1408	ENSMUSG00000012640	Zfp715	1907	3567	4067	3660	2825	2829
1409	ENSMUSG00000012705	Retn	0	3	4	0	0	0
1410	ENSMUSG00000012777	Acpt	1	4	4	3	0	2
1411	ENSMUSG00000012819	Cdh23	296	453	1159	1050	406	290
1412	ENSMUSG00000012848	Rps5	125915	122327	140215	128257	135253	135688
1413	ENSMUSG00000012889	Podnl1	2556	4596	1725	728	3469	3092
1414	ENSMUSG00000013033	Adgrl1	377	509	311	145	508	407
1415	ENSMUSG00000013076	Amotl1	771	803	381	408	593	621
1416	ENSMUSG00000013083	2200002J24Rik	0	0	0	0	0	1
1417	ENSMUSG00000013089	Etv5	2072	1026	723	676	929	854
1418	ENSMUSG00000013091	Tmem190	8	41	4	5	34	24
1419	ENSMUSG00000013150	Gfod2	253	396	156	210	426	380
1420	ENSMUSG00000013155	Enkd1	1299	1371	1334	641	1383	1124
1421	ENSMUSG00000013158	4933405L10Rik	10	6	7	3	3	9
1422	ENSMUSG00000013160	Atp6v0d1	8301	7452	7929	7357	7189	7100
1423	ENSMUSG00000013236	Ptprs	8091	8802	9701	6671	8347	6930
1424	ENSMUSG00000013275	Slc41a1	1605	1921	4343	8088	2033	2198
1425	ENSMUSG00000013338	Fer1l4	0	0	0	1	0	0
1426	ENSMUSG00000013353	4931406B18Rik	0	0	0	0	0	0
1427	ENSMUSG00000013367	Iglon5	0	4	0	4	3	8
1428	ENSMUSG00000013415	Igf2bp1	4	2	2	2	2	2
1429	ENSMUSG00000013418	B4galnt2	881	1647	3407	915	1333	1564
1430	ENSMUSG00000013419	Zfp651	8	34	5	4	8	5
1431	ENSMUSG00000013465	Nelfb	9604	9563	7863	6551	9729	9709
1432	ENSMUSG00000013483	Card14	13	11	8	0	5	5
1433	ENSMUSG00000013495	Tmem175	1418	1581	1184	912	1516	1387
1434	ENSMUSG00000013523	Bcas1	59	110	26	18	101	100
1435	ENSMUSG00000013539	Tango2	1251	1826	918	798	1576	1440
1436	ENSMUSG00000013562	4833413E03Rik	17	23	10	2	13	7
1437	ENSMUSG00000013584	Aldh1a2	0	1	0	0	0	0
1438	ENSMUSG00000013593	Ndufs2	15689	16371	15181	14297	16843	17007
1439	ENSMUSG00000013611	Snx31	46	34	6	13	43	51
1440	ENSMUSG00000013622	Atraid	2696	2851	2169	2000	2926	2894
1441	ENSMUSG00000013629	Cad	19875	25415	13154	13661	24229	18993
1442	ENSMUSG00000013643	Lypd8	0	0	0	0	0	0
1443	ENSMUSG00000013646	Sh3bp5l	1797	3407	1651	1960	2445	2872
1444	ENSMUSG00000013653	1810065E05Rik	0	0	0	0	0	0
1445	ENSMUSG00000013662	Atad1	10769	13220	11358	13778	12509	13292
1446	ENSMUSG00000013663	Pten	10723	15067	9523	10064	13030	13686
1447	ENSMUSG00000013668	4933402N03Rik	0	0	0	0	0	0
1448	ENSMUSG00000013698	Pea15a	5157	4660	5275	3971	4666	4897
1449	ENSMUSG00000013701	Timm23	3703	4249	3610	4055	4965	4761
1450	ENSMUSG00000013707	Tnfaip8l2	1963	4114	899	799	2994	3183
1451	ENSMUSG00000013736	Trnt1	5207	7944	6066	5749	7880	7480
1452	ENSMUSG00000013766	Ly6g6e	0	0	0	0	0	0
1453	ENSMUSG00000013787	Ehmt2	23581	19632	17608	11665	21435	19654
1454	ENSMUSG00000013822	Elof1	4549	5843	3956	3952	6080	5931
1455	ENSMUSG00000013833	Med16	3529	4357	2452	2328	3517	3195
1456	ENSMUSG00000013846	St3gal1	7434	10111	2572	4075	7763	8100
1457	ENSMUSG00000013858	Tmem259	9509	14015	10311	8363	12661	11939
1458	ENSMUSG00000013878	Rnf170	963	1592	859	963	1371	1372
1459	ENSMUSG00000013921	Clip3	24	48	17	12	44	38
1460	ENSMUSG00000013928	Thap8	0	3	4	1	4	2
1461	ENSMUSG00000013936	Myl2	1	1	5	0	3	3
1462	ENSMUSG00000013973	Dedd	718	785	872	728	686	789
1463	ENSMUSG00000013974	Mcemp1	2	4	2	0	0	0
1464	ENSMUSG00000013997	Nit1	2852	2245	2662	2283	2582	2396
1465	ENSMUSG00000014030	Pax5	5	2	0	3	0	0
1466	ENSMUSG00000014039	Prdm15	1141	2105	1665	1790	1993	1600
1467	ENSMUSG00000014074	Rnf168	3241	6536	3006	2235	5666	5594
1468	ENSMUSG00000014075	Tctex1d2	333	332	334	236	401	407
1469	ENSMUSG00000014077	Chp1	13137	12134	13754	13506	11533	13934
1470	ENSMUSG00000014104	Sval2	0	0	0	0	0	0
1471	ENSMUSG00000014158	Trpv4	34	4	3	6	7	14
1472	ENSMUSG00000014164	Klhl3	10	2	7	4	6	0
1473	ENSMUSG00000014177	Tvp23b	2704	2713	2989	2664	3134	3291
1474	ENSMUSG00000014195	Dnajc7	13512	21338	12820	11666	18524	18471
1475	ENSMUSG00000014198	Zfp385c	3	2	5	2	4	2
1476	ENSMUSG00000014226	Cacybp	14350	21165	13914	15313	23502	22351
1477	ENSMUSG00000014232	Cluap1	824	1018	663	678	1045	1025
1478	ENSMUSG00000014243	Zswim7	561	548	443	484	682	549
1479	ENSMUSG00000014245	Pigl	663	896	721	645	913	954
1480	ENSMUSG00000014294	Ndufa2	4294	4370	5072	4218	4855	4640
1481	ENSMUSG00000014301	Pam16	262	277	312	251	261	210
1482	ENSMUSG00000014303	Glis2	247	266	177	96	299	279
1483	ENSMUSG00000014313	Cox6c	8552	9004	9805	9296	9602	9692
1484	ENSMUSG00000014329	Bicc1	2	0	0	0	0	0
1485	ENSMUSG00000014349	Ube2z	15201	19094	13510	13793	16242	18628
1486	ENSMUSG00000014351	Gip	0	0	0	0	0	0
1487	ENSMUSG00000014353	Tmem87b	764	1202	1196	1213	1046	960
1488	ENSMUSG00000014355	Anapc1	23863	27160	18692	19399	24994	24953
1489	ENSMUSG00000014361	Mertk	2	0	0	0	0	0
1490	ENSMUSG00000014402	Tsg101	2913	3030	3601	3292	2962	3180
1491	ENSMUSG00000014418	Hps5	3262	4058	3356	2446	3785	3219
1492	ENSMUSG00000014426	Map3k4	5048	5534	3112	2082	5018	4828
1493	ENSMUSG00000014444	Piezo1	11456	13765	15345	12487	13413	11534
1494	ENSMUSG00000014453	Blk	0	2	0	0	9	2
1495	ENSMUSG00000014470	Rnf166	4495	7686	4853	3249	6111	5862
1496	ENSMUSG00000014496	Ankrd28	6184	6580	5886	5594	7145	6152
1497	ENSMUSG00000014498	Ankrd52	14712	18767	11847	14839	16588	16636
1498	ENSMUSG00000014503	Pkd2l2	128	289	188	142	197	205
1499	ENSMUSG00000014504	Srp19	8004	9360	9722	8240	9444	9308
1500	ENSMUSG00000014529	Tmbim7	3	1	6	2	0	0
1501	ENSMUSG00000014542	Clec4f	0	0	0	0	0	0
1502	ENSMUSG00000014543	Klra17	2	9	10	7	8	8
1503	ENSMUSG00000014547	Wdfy2	727	617	340	448	630	541
1504	ENSMUSG00000014550	Rbsn	3956	4566	3800	4125	3956	4191
1505	ENSMUSG00000014551	Mrps25	3365	3888	4058	3087	4022	3938
1506	ENSMUSG00000014554	Dguok	1650	1585	1657	1088	1663	1464
1507	ENSMUSG00000014592	Camta1	1245	1175	1880	1343	1350	1272
1508	ENSMUSG00000014599	Csf1	216	1038	658	2340	466	809
1509	ENSMUSG00000014601	Strip1	7721	6902	6722	5756	6642	6568
1510	ENSMUSG00000014602	Kif1a	25	2	27	7	12	6
1511	ENSMUSG00000014603	Alx3	0	0	0	0	0	0
1512	ENSMUSG00000014606	Slc25a11	6669	5596	7370	5241	6228	5687
1513	ENSMUSG00000014609	Chrne	15	22	45	21	21	18
1514	ENSMUSG00000014633	Cmc2	1679	2074	1932	1382	1945	1981
1515	ENSMUSG00000014668	Chfr	7099	8040	7297	5671	7720	7179
1516	ENSMUSG00000014686	Ceacam16	170	534	666	195	340	236
1517	ENSMUSG00000014704	Hoxa2	0	0	0	0	0	0
1518	ENSMUSG00000014725	Adam28	0	1	0	0	0	0
1519	ENSMUSG00000014747	Ankrd53	2	10	15	10	11	6
1520	ENSMUSG00000014748	Tex261	7373	10609	6811	6481	9413	9211
1521	ENSMUSG00000014763	Fam120b	3136	4229	3498	3508	4135	3931
1522	ENSMUSG00000014767	Tbp	4215	5905	4447	4098	5231	5475
1523	ENSMUSG00000014769	Psmb1	27668	28147	24945	26721	31553	31287
1524	ENSMUSG00000014771	Pdcd2	0	0	0	0	0	0
1525	ENSMUSG00000014773	Dll1	1	4	2	2	2	0
1526	ENSMUSG00000014776	Nol3	34	67	30	35	71	68
1527	ENSMUSG00000014778	Fhod1	2978	3567	4528	2364	3209	2616
1528	ENSMUSG00000014782	Plekhg4	45	193	106	59	149	78
1529	ENSMUSG00000014786	Slc9a5	1466	1768	1999	962	1729	1145
1530	ENSMUSG00000014791	Elmo3	152	487	334	150	382	292
1531	ENSMUSG00000014813	Stc1	110	132	172	155	153	145
1532	ENSMUSG00000014837	4931428F04Rik	713	688	874	456	658	674
1533	ENSMUSG00000014846	Tppp3	10	27	12	13	12	22
1534	ENSMUSG00000014850	Msh3	2229	2995	1400	1023	2688	2415
1535	ENSMUSG00000014852	Adamts13	3	6	7	6	4	6
1536	ENSMUSG00000014856	Tmem208	1685	2633	2148	1741	2799	2493
1537	ENSMUSG00000014859	E2f4	28259	31821	29069	22126	31002	29875
1538	ENSMUSG00000014867	Surf4	40613	52125	34581	35074	47096	48900
1539	ENSMUSG00000014873	Surf2	2732	4346	2747	2835	4304	3658
1540	ENSMUSG00000014905	Dnajb9	1371	2853	1751	1528	2460	2739
1541	ENSMUSG00000014907	Naf1	3564	3815	4394	5221	4203	3630
1542	ENSMUSG00000014932	Yes1	374	508	513	732	472	479
1543	ENSMUSG00000014956	Ppp1cb	29451	30987	27549	25114	30920	30353
1544	ENSMUSG00000014959	Gorasp2	20733	27855	21394	21338	24534	25874
1545	ENSMUSG00000014980	Tsen15	523	1132	548	409	979	945
1546	ENSMUSG00000015001	Oc90	0	0	0	0	0	0
1547	ENSMUSG00000015002	Efr3a	14388	16819	14433	13474	16721	16796
1548	ENSMUSG00000015013	Trappc2l	1418	1471	1601	1462	1512	1583
1549	ENSMUSG00000015016	Acsf3	1435	1643	1029	834	1498	1279
1550	ENSMUSG00000015023	Ddx19a	10751	13554	8799	9686	12929	12665
1551	ENSMUSG00000015027	Galns	5092	4828	3997	3622	4824	4407
1552	ENSMUSG00000015053	Gata2	0	0	2	4	0	0
1553	ENSMUSG00000015083	C8g	158	173	112	79	175	122
1554	ENSMUSG00000015085	Entpd2	21	27	25	16	13	7
1555	ENSMUSG00000015087	Rabl6	8608	11446	6953	6430	11049	10220
1556	ENSMUSG00000015090	Ptgds	0	0	3	0	0	0
1557	ENSMUSG00000015092	Edf1	14111	14371	16638	14384	14650	14645
1558	ENSMUSG00000015093	Clic3	57	168	70	31	119	104
1559	ENSMUSG00000015094	Npdc1	189	152	317	119	148	141
1560	ENSMUSG00000015095	Fbxw5	2758	2804	2340	1636	2881	2239
1561	ENSMUSG00000015112	Slc25a13	1826	2728	2027	1532	2730	2937
1562	ENSMUSG00000015120	Ube2i	7520	11165	10780	7661	9470	8648
1563	ENSMUSG00000015126	Tsr3	2535	2701	2347	1676	2863	2692
1564	ENSMUSG00000015127	Unkl	2265	3762	3565	2172	2938	2689
1565	ENSMUSG00000015133	Lrrk1	6747	10104	12479	6721	9193	8703
1566	ENSMUSG00000015134	Aldh1a3	63	55	61	36	69	52
1567	ENSMUSG00000015143	Actn1	4434	4019	3424	2697	3941	3573
1568	ENSMUSG00000015149	Sirt2	6861	7105	7922	7473	6762	6686
1569	ENSMUSG00000015165	Hnrnpl	43440	35635	50225	33539	37592	32499
1570	ENSMUSG00000015176	Nolc1	22099	36935	29936	35798	38962	33930
1571	ENSMUSG00000015189	Casd1	1597	3133	1238	1349	2477	2527
1572	ENSMUSG00000015202	Cnksr3	343	248	310	203	349	237
1573	ENSMUSG00000015214	Mtmr1	11420	11529	11960	11389	11979	11889
1574	ENSMUSG00000015217	Hmgb3	3046	3505	2713	2013	3401	3172
1575	ENSMUSG00000015222	Map2	2	4	7	2	3	0
1576	ENSMUSG00000015224	Cyp2j9	2	2	0	0	0	0
1577	ENSMUSG00000015242	Nipsnap3a	0	0	0	0	0	0
1578	ENSMUSG00000015243	Abca1	291	401	362	474	303	318
1579	ENSMUSG00000015247	Nipsnap3b	3295	3494	3442	3186	3210	3168
1580	ENSMUSG00000015289	Lage3	2310	2653	2277	1900	2873	2503
1581	ENSMUSG00000015290	Ubl4a	4401	4831	4594	4475	5218	5090
1582	ENSMUSG00000015291	Gdi1	4046	5330	6960	4648	4578	3042
1583	ENSMUSG00000015305	Sash1	4	9	10	1	8	14
1584	ENSMUSG00000015312	Gadd45b	2585	1986	8182	6655	2015	2225
1585	ENSMUSG00000015314	Slamf6	1216	2194	254	360	1757	1708
1586	ENSMUSG00000015316	Slamf1	2387	1857	1962	6937	1878	1999
1587	ENSMUSG00000015335	Zdhhc12	1480	1579	1707	1211	1379	1340
1588	ENSMUSG00000015337	Endog	921	866	713	505	936	824
1589	ENSMUSG00000015340	Cybb	10	12	0	0	8	11
1590	ENSMUSG00000015341	Golga7	12325	11903	13209	12413	11507	11348
1591	ENSMUSG00000015342	Xk	444	503	167	215	474	430
1592	ENSMUSG00000015354	Pcolce2	2	0	4	1	4	0
1593	ENSMUSG00000015355	Cd48	18528	26276	20583	14572	25333	24155
1594	ENSMUSG00000015357	Clpx	7147	6581	6939	5101	7216	7295
1595	ENSMUSG00000015363	Trabd	10372	9996	9589	7557	10903	10282
1596	ENSMUSG00000015365	Mov10l1	0	0	0	0	0	0
1597	ENSMUSG00000015377	Dennd6b	174	453	304	137	408	234
1598	ENSMUSG00000015396	Cd83	230	62	515	316	43	43
1599	ENSMUSG00000015401	Tmem27	0	0	2	1	2	0
1600	ENSMUSG00000015405	Ace2	0	2	0	0	0	0
1601	ENSMUSG00000015437	Gzmb	1509718	1445338	3314628	3084403	1790203	2180906
1602	ENSMUSG00000015441	Gzmf	383	679	14615	1847	808	1040
1603	ENSMUSG00000015443	Gzmn	12	10	441	39	24	35
1604	ENSMUSG00000015451	C4a	15	47	40	19	61	47
1605	ENSMUSG00000015452	Ager	21	142	21	28	89	80
1606	ENSMUSG00000015461	Atf6b	5612	6726	5145	4447	6514	5833
1607	ENSMUSG00000015467	Egfl8	10	10	12	4	9	7
1608	ENSMUSG00000015468	Notch4	23	42	16	24	26	19
1609	ENSMUSG00000015474	Ppt2	558	480	530	377	463	478
1610	ENSMUSG00000015476	Prrt1	98	50	94	49	73	51
1611	ENSMUSG00000015478	Rnf5	1221	1199	1357	1160	1169	1214
1612	ENSMUSG00000015484	Fam163a	0	0	0	0	1	0
1613	ENSMUSG00000015488	Cacfd1	2267	3407	1722	1882	2727	2836
1614	ENSMUSG00000015501	Hivep2	3433	4927	6373	15258	3879	4440
1615	ENSMUSG00000015519	2310057J18Rik	0	0	0	0	0	0
1616	ENSMUSG00000015522	Arnt	6322	5843	4722	4427	4954	5117
1617	ENSMUSG00000015533	Itga2	342	517	312	233	425	392
1618	ENSMUSG00000015536	Mocs2	1310	2082	1458	979	2108	2021
1619	ENSMUSG00000015542	Nat9	874	657	921	612	752	757
1620	ENSMUSG00000015568	Lpl	5	0	4	0	2	7
1621	ENSMUSG00000015575	Atp6v0e	8225	8954	9758	8769	9196	9360
1622	ENSMUSG00000015579	Nkx2-5	0	0	0	0	0	0
1623	ENSMUSG00000015597	Zfp318	953	625	662	679	800	580
1624	ENSMUSG00000015599	Ttbk1	10	8	0	5	7	2
1625	ENSMUSG00000015605	Srf	8175	7846	6620	8657	7138	8005
1626	ENSMUSG00000015619	Gata3	4543	5082	3042	3190	3993	3410
1627	ENSMUSG00000015627	Gata5	0	0	0	0	0	0
1628	ENSMUSG00000015647	Lama5	4781	6182	5971	3565	6424	5065
1629	ENSMUSG00000015652	Steap1	0	0	0	0	0	0
1630	ENSMUSG00000015653	Steap2	0	0	0	0	0	0
1631	ENSMUSG00000015656	Hspa8	107392	174006	100118	115834	159419	163585
1632	ENSMUSG00000015659	Serac1	285	410	270	146	359	397
1633	ENSMUSG00000015665	Awat1	0	0	0	0	0	0
1634	ENSMUSG00000015668	Pdzd11	3170	4067	3095	2613	3879	3973
1635	ENSMUSG00000015671	Psma2	23766	23695	22374	24378	26208	27670
1636	ENSMUSG00000015672	Mrpl32	5427	4903	6121	5333	5462	5237
1637	ENSMUSG00000015697	Setdb1	6416	10001	5892	4990	8957	7956
1638	ENSMUSG00000015702	Anxa9	381	820	394	299	711	547
1639	ENSMUSG00000015709	Arnt2	639	508	923	511	499	558
1640	ENSMUSG00000015711	Prune	2764	2533	2244	2097	2572	2868
1641	ENSMUSG00000015714	Cers2	14888	21132	17928	15488	20151	19736
1642	ENSMUSG00000015721	Nlrp5	0	0	0	0	0	0
1643	ENSMUSG00000015733	Capza2	37653	43215	32137	34917	43765	46432
1644	ENSMUSG00000015745	Plekho1	1083	1373	938	1321	1441	1334
1645	ENSMUSG00000015747	Vps45	2615	2591	2177	1823	2955	2959
1646	ENSMUSG00000015748	Prpf3	6239	9297	5447	5792	8340	8289
1647	ENSMUSG00000015749	Anp32e	38154	38755	29823	32305	37554	38775
1648	ENSMUSG00000015750	Aph1a	5927	6300	4926	4459	6186	5906
1649	ENSMUSG00000015755	Tab2	37564	42784	34038	27530	39181	39849
1650	ENSMUSG00000015757	Ppil4	7061	10577	7526	6778	9389	9984
1651	ENSMUSG00000015759	Cnih1	10406	12743	10197	10259	12777	12617
1652	ENSMUSG00000015766	Eps8	2483	2075	1177	1520	2213	2038
1653	ENSMUSG00000015776	Med22	4385	7287	3709	3532	6476	6367
1654	ENSMUSG00000015787	Abo	0	2	0	2	0	0
1655	ENSMUSG00000015790	Surf1	4528	4573	3984	3438	4669	4629
1656	ENSMUSG00000015804	Med28	4722	4374	5286	4667	5087	4914
1657	ENSMUSG00000015806	Qdpr	5115	5319	4578	4685	5460	5488
1658	ENSMUSG00000015812	Gnrh1	10	52	29	13	23	41
1659	ENSMUSG00000015829	Tnr	0	1	0	0	0	0
1660	ENSMUSG00000015837	Sqstm1	29395	36440	42499	30083	31222	35918
1661	ENSMUSG00000015839	Nfe2l2	2299	3319	1973	3597	2943	2889
1662	ENSMUSG00000015843	Rxrg	0	0	0	0	0	0
1663	ENSMUSG00000015846	Rxra	2248	3078	300	2066	2038	2189
1664	ENSMUSG00000015850	Adamtsl4	33	27	11	26	15	22
1665	ENSMUSG00000015852	Fcrls	12	18	17	12	9	18
1666	ENSMUSG00000015854	Cd5l	0	0	0	0	0	0
1667	ENSMUSG00000015869	Prpsap1	4900	5832	3913	3864	5865	5445
1668	ENSMUSG00000015879	Fam184b	21	119	11	19	58	62
1669	ENSMUSG00000015880	Ncapg	12104	11537	10362	6747	11862	11318
1670	ENSMUSG00000015882	Lcorl	1765	1877	1711	1708	1757	1652
1671	ENSMUSG00000015889	Lta4h	27609	27280	21651	22459	27167	26071
1672	ENSMUSG00000015890	Amdhd1	47	120	64	46	104	80
1673	ENSMUSG00000015932	Dstn	6290	6702	4717	5057	6573	6563
1674	ENSMUSG00000015937	H2afy	77761	77734	58511	64679	74961	71793
1675	ENSMUSG00000015942	Gtf2ird2	545	2139	412	423	1385	1358
1676	ENSMUSG00000015943	Bola1	1037	866	595	566	990	931
1677	ENSMUSG00000015944	Gatsl2	2534	2858	2270	2055	2696	3141
1678	ENSMUSG00000015947	Fcgr1	0	0	0	0	2	0
1679	ENSMUSG00000015950	Ncf1	1077	732	1724	1026	910	794
1680	ENSMUSG00000015957	Wnt11	2	12	100	31	7	6
1681	ENSMUSG00000015961	Adss	13329	14212	14053	14287	14986	13121
1682	ENSMUSG00000015962	1700016C15Rik	2	1	0	0	0	0
1683	ENSMUSG00000015966	Il17rb	16	30	4	6	26	10
1684	ENSMUSG00000015968	Cacna1d	4	4	2	6	7	2
1685	ENSMUSG00000015970	Chdh	93	70	2	8	86	45
1686	ENSMUSG00000015971	Actr8	3453	3404	3175	2576	3699	3680
1687	ENSMUSG00000015980	Lrrc27	768	990	584	467	806	831
1688	ENSMUSG00000015981	Stk32c	2016	2214	4564	2308	2113	2364
1689	ENSMUSG00000015994	Fnta	4272	5805	2790	3710	5634	5529
1690	ENSMUSG00000016018	Skiv2l2	16332	21620	15563	15983	21848	21554
1691	ENSMUSG00000016024	Lbp	0	1	43	0	2	0
1692	ENSMUSG00000016028	Celsr1	13055	11632	9565	13451	11535	10384
1693	ENSMUSG00000016087	Fli1	26111	25888	19298	20541	25071	22758
1694	ENSMUSG00000016128	Stard13	86	85	119	96	91	77
1695	ENSMUSG00000016150	Tenm1	2	0	0	2	1	0
1696	ENSMUSG00000016179	Camk1g	3	1	2	0	6	8
1697	ENSMUSG00000016181	Diexf	2302	3495	3881	5140	3572	3088
1698	ENSMUSG00000016194	Hsd11b1	3383	4283	2529	3199	4312	3954
1699	ENSMUSG00000016200	Syt14	0	10	2	2	0	2
1700	ENSMUSG00000016206	H2-M3	2420	2439	2294	1791	2618	2503
1701	ENSMUSG00000016239	Lonrf3	58	34	64	34	48	25
1702	ENSMUSG00000016252	Atp5e	7282	6462	8150	6824	8341	7791
1703	ENSMUSG00000016253	Nelfcd	4528	5783	3162	2997	5406	4844
1704	ENSMUSG00000016255	Tubb1	0	0	0	0	3	0
1705	ENSMUSG00000016256	Ctsz	12323	12186	9322	10862	12152	12689
1706	ENSMUSG00000016257	Slmo2	14908	15568	15817	16464	16221	16166
1707	ENSMUSG00000016262	Sertad4	0	2	0	2	0	0
1708	ENSMUSG00000016283	H2-M2	0	0	0	0	0	0
1709	ENSMUSG00000016308	Ube2a	7269	7826	7816	8315	7986	7686
1710	ENSMUSG00000016319	Slc25a5	59094	58255	57589	57670	62008	61205
1711	ENSMUSG00000016327	Atp1b4	0	0	0	0	0	0
1712	ENSMUSG00000016344	Ppdpf	4709	4524	3858	3854	4854	4590
1713	ENSMUSG00000016346	Kcnq2	2	3	0	8	2	1
1714	ENSMUSG00000016349	Eef1a2	1	0	0	0	0	0
1715	ENSMUSG00000016356	Col20a1	42	184	70	56	114	82
1716	ENSMUSG00000016382	Pls3	206	210	191	105	172	220
1717	ENSMUSG00000016386	Mpped2	2	0	2	0	2	0
1718	ENSMUSG00000016409	Nkap	4671	4396	3901	3400	4366	4370
1719	ENSMUSG00000016427	Ndufa1	6313	6478	6862	6468	6472	6709
1720	ENSMUSG00000016458	Wt1	0	0	0	1	0	0
1721	ENSMUSG00000016477	E2f3	2832	4809	3460	3986	3915	3845
1722	ENSMUSG00000016481	Cr1l	4805	6908	5304	5137	6296	6366
1723	ENSMUSG00000016487	Ppfibp1	2533	3239	3103	2576	3142	3135
1724	ENSMUSG00000016493	Cd46	17	77	21	14	31	23
1725	ENSMUSG00000016494	Cd34	4	4	25	13	9	14
1726	ENSMUSG00000016495	Plgrkt	2793	3620	3261	2677	3439	3286
1727	ENSMUSG00000016496	Cd274	4262	4910	16911	19075	3781	4844
1728	ENSMUSG00000016498	Pdcd1lg2	1228	1308	4236	4968	1195	1619
1729	ENSMUSG00000016503	Gtf3a	3829	4949	3388	2621	4784	4625
1730	ENSMUSG00000016510	Mtif3	1410	2098	1389	1237	1833	1958
1731	ENSMUSG00000016520	Lnx2	6473	5754	7438	10532	5309	4925
1732	ENSMUSG00000016524	Il19	42	24	34	53	37	59
1733	ENSMUSG00000016526	Dyrk3	1906	2268	2159	1790	2222	1961
1734	ENSMUSG00000016528	Mapkapk2	45137	32797	54096	55743	33963	37936
1735	ENSMUSG00000016529	Il10	3483	1664	41020	121685	2485	4663
1736	ENSMUSG00000016534	Lamp2	8431	9069	9082	9475	9405	10701
1737	ENSMUSG00000016541	Atxn10	13497	12842	11327	11288	13074	13177
1738	ENSMUSG00000016552	Foxred2	1849	3577	1543	889	3244	2647
1739	ENSMUSG00000016554	Eif3d	19489	18773	17365	18643	20193	18788
1740	ENSMUSG00000016559	H3f3b	45457	51561	62398	38390	44664	48069
1741	ENSMUSG00000016619	Nup50	20962	28524	16016	15786	25095	26415
1742	ENSMUSG00000016624	Phf21b	76	348	159	48	214	150
1743	ENSMUSG00000016626	Nlrp14	0	0	0	0	0	0
1744	ENSMUSG00000016637	Ift27	1464	1596	1533	1388	1517	1458
1745	ENSMUSG00000016664	Pacsin2	10273	15715	8718	8493	13798	13635
1746	ENSMUSG00000016756	Cmah	2455	4228	1174	1547	3310	3025
1747	ENSMUSG00000016757	Ttll12	9440	11508	6451	6182	10893	9813
1748	ENSMUSG00000016758	Bik	46	58	105	71	41	50
1749	ENSMUSG00000016763	Scube1	0	0	0	0	0	0
1750	ENSMUSG00000016831	Tox4	15065	14031	16453	17645	13339	13805
1751	ENSMUSG00000016833	Mrps18c	1562	1735	1487	1665	2023	1957
1752	ENSMUSG00000016918	Sulf1	1	8	8	1	2	10
1753	ENSMUSG00000016921	Srsf6	18321	39802	14692	18125	31796	31535
1754	ENSMUSG00000016933	Plcg1	20584	19801	16535	13323	18112	15991
1755	ENSMUSG00000016940	Kctd2	1578	2063	1157	931	1878	1751
1756	ENSMUSG00000016942	Tmprss6	97	68	242	138	93	104
1757	ENSMUSG00000016946	Kctd5	3602	4310	3369	3930	3908	4175
1758	ENSMUSG00000016982	Pom121l2	6	4	15	39	12	14
1759	ENSMUSG00000016984	Etaa1	2284	4462	2269	1801	3941	3805
1760	ENSMUSG00000016995	Matn4	0	0	0	0	0	0
1761	ENSMUSG00000016998	Svs4	0	0	0	0	0	0
1762	ENSMUSG00000017000	Svs6	0	0	0	0	0	0
1763	ENSMUSG00000017002	Slpi	236	167	106	172	175	226
1764	ENSMUSG00000017003	Svs3a	0	0	0	0	0	0
1765	ENSMUSG00000017004	Svs5	0	0	0	0	0	0
1766	ENSMUSG00000017007	Rbpjl	0	0	0	0	0	0
1767	ENSMUSG00000017009	Sdc4	648	614	486	150	543	740
1768	ENSMUSG00000017049	Ccdc70	0	0	0	0	0	0
1769	ENSMUSG00000017057	Il13ra1	132	70	477	896	96	186
1770	ENSMUSG00000017064	Prl5a1	0	0	0	0	0	0
1771	ENSMUSG00000017119	Nbr1	5170	9633	6060	4617	7483	7755
1772	ENSMUSG00000017132	Cyth1	7413	8053	6316	5597	7439	7022
1773	ENSMUSG00000017144	Rnd3	9	14	6	12	16	16
1774	ENSMUSG00000017146	Brca1	7053	7253	4898	2723	6568	5820
1775	ENSMUSG00000017165	Gast	0	0	0	0	0	0
1776	ENSMUSG00000017167	Cntnap1	93	99	36	21	82	48
1777	ENSMUSG00000017176	Nt5c3b	5509	6800	4773	4103	6835	6698
1778	ENSMUSG00000017188	Coa3	3587	4042	3232	2510	4377	4095
1779	ENSMUSG00000017195	Zpbp2	47	86	43	58	110	79
1780	ENSMUSG00000017204	Gsdma	0	4	0	2	0	2
1781	ENSMUSG00000017210	Med24	6575	8129	4520	4217	7220	6565
1782	ENSMUSG00000017211	Gsdma2	0	0	0	0	0	0
1783	ENSMUSG00000017221	Psmd3	24079	30311	22566	21606	28354	27773
1784	ENSMUSG00000017264	Exosc10	15227	20193	13977	14875	17440	17054
1785	ENSMUSG00000017286	Glod4	8813	7660	6941	7283	8712	8823
1786	ENSMUSG00000017288	Vps53	6390	8449	5401	5294	8202	7966
1787	ENSMUSG00000017291	Taok1	6971	7902	7410	8010	6231	6946
1788	ENSMUSG00000017299	Dnttip1	2140	2064	2111	1844	2062	2034
1789	ENSMUSG00000017300	Tnnc2	0	0	0	0	0	1
1790	ENSMUSG00000017307	Acot8	1009	1332	1070	869	1309	1086
1791	ENSMUSG00000017309	Cd300lg	0	2	0	0	0	2
1792	ENSMUSG00000017310	Spint4	0	0	0	0	0	0
1793	ENSMUSG00000017311	Pyy	0	0	0	0	0	0
1794	ENSMUSG00000017314	Mpp2	4401	3353	6099	4661	3338	4211
1795	ENSMUSG00000017316	Ppy	0	0	2	1	2	0
1796	ENSMUSG00000017344	Vtn	1	0	0	0	2	0
1797	ENSMUSG00000017376	Nlk	2814	4096	3008	2274	4199	3797
1798	ENSMUSG00000017386	Traf4	7200	2980	19607	17046	3520	3901
1799	ENSMUSG00000017390	Aldoc	29157	21113	21446	25091	21572	20957
1800	ENSMUSG00000017400	Stac2	1839	1193	1355	1233	1224	1226
1801	ENSMUSG00000017404	Rpl19	17383	18375	19439	16168	21193	19231
1802	ENSMUSG00000017405	Nek8	879	1004	1523	969	974	822
1803	ENSMUSG00000017412	Cacnb4	98	97	31	47	61	71
1804	ENSMUSG00000017417	Plxdc1	785	1233	591	355	1050	1023
1805	ENSMUSG00000017418	Arl5b	1843	1576	12535	13998	1538	1649
1806	ENSMUSG00000017421	Zfp207	39102	69665	37667	28780	60869	60778
1807	ENSMUSG00000017428	Psmd11	10570	12970	13050	11224	12484	12850
1808	ENSMUSG00000017446	C1qtnf1	61	116	44	26	71	75
1809	ENSMUSG00000017453	Pipox	38	37	60	10	33	31
1810	ENSMUSG00000017466	Timp2	34	32	7	24	38	29
1811	ENSMUSG00000017478	Zc3h18	12684	19039	11942	11277	16827	15594
1812	ENSMUSG00000017485	Top2b	29119	38703	24174	24464	35514	34301
1813	ENSMUSG00000017491	Rarb	13	21	19	2	33	13
1814	ENSMUSG00000017493	Igfbp4	23529	23401	4708	8921	23181	21215
1815	ENSMUSG00000017499	Cdc6	3716	6429	2700	1378	5291	4896
1816	ENSMUSG00000017548	Suz12	22580	26392	18647	16590	24413	24714
1817	ENSMUSG00000017550	Atad5	4670	7278	3628	2422	5820	5524
1818	ENSMUSG00000017561	Crlf3	6517	7457	6467	4957	7380	6938
1819	ENSMUSG00000017588	Krt27	0	0	0	0	0	0
1820	ENSMUSG00000017607	Tns4	64	51	0	3	46	39
1821	ENSMUSG00000017615	Tnfaip1	3319	3552	2812	2830	3420	3426
1822	ENSMUSG00000017631	Abr	15481	22912	18229	12780	17989	18079
1823	ENSMUSG00000017639	Rab11fip4	4837	8073	7151	9698	6168	6141
1824	ENSMUSG00000017652	Cd40	6	11	4	0	1	0
1825	ENSMUSG00000017664	Slc35c2	5826	8235	4746	3971	7172	6373
1826	ENSMUSG00000017667	Zfp334	2	4	18	8	8	12
1827	ENSMUSG00000017670	Elmo2	16621	22619	14802	17935	21357	21820
1828	ENSMUSG00000017677	Wsb1	4307	7377	8944	7678	5904	6305
1829	ENSMUSG00000017679	Ttpal	5680	8553	4600	5418	7747	7879
1830	ENSMUSG00000017686	Rhot1	5202	6939	4591	4050	6879	6656
1831	ENSMUSG00000017688	Hnf4g	0	0	0	0	0	0
1832	ENSMUSG00000017692	Rhbdl3	597	1061	617	354	893	1038
1833	ENSMUSG00000017697	Ada	2334	2219	1291	1825	2540	2595
1834	ENSMUSG00000017707	Serinc3	69592	78570	58805	52656	70642	68705
1835	ENSMUSG00000017713	Tha1	133	376	74	72	393	270
1836	ENSMUSG00000017715	Pgs1	4950	5650	7539	7507	6610	6109
1837	ENSMUSG00000017716	Birc5	15369	17266	13667	8688	15270	14354
1838	ENSMUSG00000017718	Afmid	262	400	315	159	376	267
1839	ENSMUSG00000017720	Trp53tg5	3	9	2	4	3	3
1840	ENSMUSG00000017721	Pigt	10041	10124	7774	8042	8920	9270
1841	ENSMUSG00000017723	Wfdc2	0	0	0	0	0	0
1842	ENSMUSG00000017724	Etv4	1227	1159	1710	1091	1143	1154
1843	ENSMUSG00000017733	Eppin	0	0	0	0	0	0
1844	ENSMUSG00000017734	Dbndd2	10	28	9	6	5	22
1845	ENSMUSG00000017737	Mmp9	150	148	338	97	134	127
1846	ENSMUSG00000017740	Slc12a5	6	31	12	14	6	9
1847	ENSMUSG00000017747	Ghdc	1119	960	808	925	1012	987
1848	ENSMUSG00000017754	Pltp	212	246	131	208	300	196
1849	ENSMUSG00000017756	Slc12a7	2018	2936	1475	1518	2485	1992
1850	ENSMUSG00000017760	Ctsa	11856	11726	10957	11464	12213	11143
1851	ENSMUSG00000017764	Zswim1	1236	1446	1400	1244	1180	1306
1852	ENSMUSG00000017765	Slc12a4	3570	2616	4580	4220	2738	2801
1853	ENSMUSG00000017767	Spata25	0	0	0	2	3	2
1854	ENSMUSG00000017774	Myo1c	6167	5979	5507	7215	5692	5818
1855	ENSMUSG00000017776	Crk	5498	8513	6047	6365	7038	8290
1856	ENSMUSG00000017778	Cox7c	2805	3265	3132	2822	3316	3018
1857	ENSMUSG00000017781	Pitpna	27859	35340	31639	29845	32796	34937
1858	ENSMUSG00000017801	Mlx	6970	5989	7444	7263	6582	6816
1859	ENSMUSG00000017802	Fam134c	5522	9026	3933	3759	7275	7212
1860	ENSMUSG00000017817	Jph2	0	2	0	0	0	0
1861	ENSMUSG00000017830	Dhx58	2960	1119	1128	1442	1413	1461
1862	ENSMUSG00000017831	Rab5a	6728	7293	8563	8320	6528	7944
1863	ENSMUSG00000017832	Hspb9	21	17	13	3	24	28
1864	ENSMUSG00000017837	Nkiras2	3984	4938	2931	3122	4459	4883
1865	ENSMUSG00000017843	Ppp2r5c	24996	26607	22000	23232	25092	24810
1866	ENSMUSG00000017858	Ift52	7420	6573	6628	5226	6716	6268
1867	ENSMUSG00000017861	Mybl2	4807	7214	4585	2437	6707	6213
1868	ENSMUSG00000017868	Sgk2	0	0	0	0	2	0
1869	ENSMUSG00000017897	Eya2	5792	8037	3352	2861	5704	5908
1870	ENSMUSG00000017922	Prl3c1	0	0	0	0	0	0
1871	ENSMUSG00000017929	B4galt5	22132	27057	42153	68117	21775	25748
1872	ENSMUSG00000017943	Gdap1l1	1	0	0	0	0	4
1873	ENSMUSG00000017950	Hnf4a	0	0	0	0	0	0
1874	ENSMUSG00000017969	Ptgis	5	10	15	6	2	8
1875	ENSMUSG00000017978	Cadps2	24	0	0	0	0	0
1876	ENSMUSG00000017999	Ddx27	14954	22002	16272	15280	22548	20679
1877	ENSMUSG00000018001	Cyth3	1085	987	832	676	820	1033
1878	ENSMUSG00000018008	Cyth4	13799	23143	16661	20422	17627	19124
1879	ENSMUSG00000018012	Rac3	30	49	25	36	52	46
1880	ENSMUSG00000018040	Rrp7a	6231	7706	6733	7271	7468	7205
1881	ENSMUSG00000018042	Cyb5r3	7087	6782	5066	5066	6558	6404
1882	ENSMUSG00000018068	Ints2	4007	5807	3562	3252	5610	5112
1883	ENSMUSG00000018076	Med13l	10486	10814	10039	12630	10340	9074
1884	ENSMUSG00000018102	Hist1h2bc	484	316	1624	274	316	324
1885	ENSMUSG00000018126	Baiap2l2	13	22	14	6	25	16
1886	ENSMUSG00000018143	Mafk	3312	3953	3927	6884	3361	3697
1887	ENSMUSG00000018160	Med1	9630	11986	9732	10746	10231	9712
1888	ENSMUSG00000018166	Erbb3	1195	1626	822	1060	1491	1558
1889	ENSMUSG00000018167	Stard3	1630	2547	2058	2380	2038	2166
1890	ENSMUSG00000018168	Ikzf3	4701	5669	8518	9363	5115	4120
1891	ENSMUSG00000018169	Mfng	6846	12441	8119	6901	10595	9670
1892	ENSMUSG00000018171	Vmp1	6770	12994	8591	6998	11559	9683
1893	ENSMUSG00000018189	Uchl5	9319	10095	8794	7137	11101	10945
1894	ENSMUSG00000018196	Glrx2	2108	2480	2023	1851	2525	2617
1895	ENSMUSG00000018199	Trove2	930	1224	686	832	950	1034
1896	ENSMUSG00000018209	Stk4	23243	28228	15939	20314	24139	24565
1897	ENSMUSG00000018211	Wfdc15b	0	0	0	0	0	0
1898	ENSMUSG00000018217	Pmp22	0	2	0	4	4	0
1899	ENSMUSG00000018238	Gdf9	14	24	4	10	11	14
1900	ENSMUSG00000018239	Zcchc10	1753	1943	2139	2174	2017	2005
1901	ENSMUSG00000018259	Prl8a2	0	0	0	0	0	0
1902	ENSMUSG00000018263	Tbx5	0	0	0	0	0	0
1903	ENSMUSG00000018286	Psmb6	15046	18025	17352	16182	18330	19075
1904	ENSMUSG00000018287	Spag7	9731	7827	8724	7695	8004	8405
1905	ENSMUSG00000018293	Pfn1	140811	141290	167672	148154	133672	131815
1906	ENSMUSG00000018322	Tomm34	5852	8091	6151	6134	6724	6650
1907	ENSMUSG00000018326	Ywhab	24289	34524	19577	22923	30159	31455
1908	ENSMUSG00000018334	Ksr1	8452	11589	9896	16194	10611	11251
1909	ENSMUSG00000018339	Gpx3	13	35	7	8	22	20
1910	ENSMUSG00000018340	Anxa6	109089	107371	96021	94283	102313	100000
1911	ENSMUSG00000018341	Il12rb2	20227	17511	15484	36781	18236	25492
1912	ENSMUSG00000018347	Zkscan6	1828	1764	2172	1961	1678	1856
1913	ENSMUSG00000018362	Kpna2	8646	11264	6148	5222	10553	10024
1914	ENSMUSG00000018363	Smurf2	4381	6003	4828	4174	5263	5586
1915	ENSMUSG00000018372	Cep95	1186	2234	1256	892	1765	1659
1916	ENSMUSG00000018377	Vezf1	4872	6945	4067	3957	4833	5617
1917	ENSMUSG00000018378	Cuedc1	867	934	450	303	1014	786
1918	ENSMUSG00000018379	Srsf1	34942	75429	35813	43946	63320	67958
1919	ENSMUSG00000018381	Abi3	676	1017	1130	953	838	916
1920	ENSMUSG00000018387	Shroom1	0	0	0	0	0	0
1921	ENSMUSG00000018395	Kif3a	2235	2663	1227	1427	2466	2425
1922	ENSMUSG00000018398	Sept8	754	898	173	260	775	721
1923	ENSMUSG00000018401	Mtmr4	3072	3653	1766	1394	3388	3175
1924	ENSMUSG00000018405	Mrm1	1521	1970	1438	1151	2091	1651
1925	ENSMUSG00000018411	Mapt	6	10	7	4	2	13
1926	ENSMUSG00000018412	Kansl1	7808	12524	7191	6471	9442	10094
1927	ENSMUSG00000018415	Gid4	4818	5897	4932	4373	5818	5459
1928	ENSMUSG00000018417	Myo1b	7	24	21	28	19	18
1929	ENSMUSG00000018425	Dhx40	4503	4855	3636	3449	4566	4751
1930	ENSMUSG00000018427	Ypel2	89	161	68	62	105	100
1931	ENSMUSG00000018428	Akap1	2843	6328	2284	2581	6205	5006
1932	ENSMUSG00000018433	Nol11	8507	11553	8104	11193	11431	10437
1933	ENSMUSG00000018442	Derl2	4627	6288	5115	4563	5760	5726
1934	ENSMUSG00000018446	C1qbp	23076	26961	21226	23903	27948	26118
1935	ENSMUSG00000018449	Rpain	920	1100	706	621	1283	1125
1936	ENSMUSG00000018451	6330403K07Rik	8	20	4	4	18	8
1937	ENSMUSG00000018459	Slc13a3	21	17	134	308	21	20
1938	ENSMUSG00000018470	Kcnab3	148	67	226	106	134	65
1939	ENSMUSG00000018474	Chd3	10761	10473	12410	9433	9961	9146
1940	ENSMUSG00000018476	Kdm6b	5076	4171	24898	46061	3382	3506
1941	ENSMUSG00000018479	1700125H20Rik	3	1	0	2	5	2
1942	ENSMUSG00000018481	Appbp2	7042	8086	7204	9147	7498	7254
1943	ENSMUSG00000018486	Wnt9b	0	0	0	4	0	0
1944	ENSMUSG00000018500	Adora2b	521	356	1812	1990	459	638
1945	ENSMUSG00000018501	Ncor1	39795	50404	30594	29971	45433	42149
1946	ENSMUSG00000018507	Trpv2	22442	21750	17731	25091	21876	22377
1947	ENSMUSG00000018509	Cenpv	1180	1464	921	863	1582	1663
1948	ENSMUSG00000018537	Pcgf2	1253	1560	1242	846	1398	1246
1949	ENSMUSG00000018541	Cwc25	3345	4308	3252	3747	3515	3828
1950	ENSMUSG00000018543	1700001P01Rik	2	12	2	2	5	9
1951	ENSMUSG00000018547	Pip4k2b	13026	16403	9085	9280	15173	14248
1952	ENSMUSG00000018548	Trim37	5842	7502	4155	3501	7534	6678
1953	ENSMUSG00000018554	Ybx2	20	18	31	16	21	5
1954	ENSMUSG00000018559	Ctdnep1	7970	8529	12006	11149	7966	8740
1955	ENSMUSG00000018565	Elp5	3878	4222	5665	5856	4712	4762
1956	ENSMUSG00000018566	Slc2a4	18	4	2	4	4	6
1957	ENSMUSG00000018567	Gabarap	18846	17908	20717	20523	18284	18656
1958	ENSMUSG00000018569	Cldn7	15	13	10	8	14	26
1959	ENSMUSG00000018570	2810408A11Rik	453	300	661	293	362	327
1960	ENSMUSG00000018572	Phf23	5568	6017	7140	7737	5817	5801
1961	ENSMUSG00000018574	Acadvl	5126	4545	4043	4004	4709	4712
1962	ENSMUSG00000018581	Dnah11	33	47	44	34	52	32
1963	ENSMUSG00000018583	G3bp1	31202	40023	25937	27280	38021	35359
1964	ENSMUSG00000018585	Atox1	2993	2769	3356	2966	3261	2977
1965	ENSMUSG00000018589	Glra2	0	0	0	0	0	0
1966	ENSMUSG00000018593	Sparc	3	5	0	7	2	8
1967	ENSMUSG00000018595	Glra4	2	13	3	3	7	5
1968	ENSMUSG00000018599	Mief2	677	1188	350	273	1036	966
1969	ENSMUSG00000018604	Tbx3	0	0	0	0	0	0
1970	ENSMUSG00000018620	Mmp20	0	0	0	0	0	0
1971	ENSMUSG00000018623	Mmp7	0	0	0	0	0	0
1972	ENSMUSG00000018634	Crhr1	0	0	0	0	0	0
1973	ENSMUSG00000018648	Dusp14	1640	1862	3089	1923	1758	1954
1974	ENSMUSG00000018651	Tada2a	1726	2744	1111	898	2864	2347
1975	ENSMUSG00000018654	Ikzf1	39471	53313	40620	47071	48613	47023
1976	ENSMUSG00000018656	Tcaf3	0	0	0	0	0	0
1977	ENSMUSG00000018659	Pnpo	1677	2426	1161	1344	2615	2239
1978	ENSMUSG00000018661	Cog1	4392	4496	3551	3505	3923	3660
1979	ENSMUSG00000018666	Cbx1	7030	8666	7113	5374	8470	8364
1980	ENSMUSG00000018669	Cdk5rap3	4634	5065	3320	3796	4898	4636
1981	ENSMUSG00000018672	Copz2	337	303	252	327	313	291
1982	ENSMUSG00000018677	Slc25a39	10874	10790	10826	9763	11204	10581
1983	ENSMUSG00000018678	Sp2	5388	5714	4392	4299	3946	4568
1984	ENSMUSG00000018697	Aatf	4594	8039	4173	4686	7831	6789
1985	ENSMUSG00000018698	Lhx1	0	0	0	0	0	0
1986	ENSMUSG00000018707	Dync1h1	29060	31081	21363	22322	29797	22358
1987	ENSMUSG00000018727	Cpsf4l	3	22	14	7	15	7
1988	ENSMUSG00000018733	Pex12	1299	2169	1356	1630	1945	1911
1989	ENSMUSG00000018736	Ndel1	7740	7576	11432	12341	6993	7901
1990	ENSMUSG00000018740	Slc25a35	419	478	197	172	423	326
1991	ENSMUSG00000018750	Zbtb4	1424	2972	1417	1134	2474	2323
1992	ENSMUSG00000018752	Tnfsfm13	0	0	0	4	2	0
1993	ENSMUSG00000018761	Mpdu1	4537	5504	4794	5174	5041	4739
1994	ENSMUSG00000018765	Fxr2	8145	7476	10805	9628	7811	7542
1995	ENSMUSG00000018770	Atp5g3	19030	20984	20832	21339	21332	22947
1996	ENSMUSG00000018774	Cd68	2253	1715	3107	2267	1703	1629
1997	ENSMUSG00000018776	Slc35g3	4	18	1	6	8	7
1998	ENSMUSG00000018796	Acsl1	1921	2596	1539	1253	2310	2139
1999	ENSMUSG00000018800	Abca5	253	213	128	163	197	189
[truncated: 46,527 more rows]
