# Supplementary material for: Cytotoxic T cells swarm by homotypic chemokine signalling
Source: eLife. 2020 Oct 13;9:e56554. doi: 10.7554/eLife.56554 (PMC7669268; doi:10.7554/eLife.56554)
Supplement: Supplementary file 2. — Tables detailing secreted proteins identified by quantitative mass spectrometry analysis, including the proteins exhibiting significant differences between the cognate versus non-cognate cells and beads. [file elife-56554-supp2.xlsx]

## Sheet: Highlighted GPCR ligands
Summary of proteingroups table after searching with MaxQuant. Majority Protein ID = the majority of the peptides belong to the first Uniprot accession number. Razor + unique Peptides= number of unique peptide sequences obtained by removing the redundancy from the peptide hits as well as the peptides identified as belonging to the protein group with the largest number of peptides. LFQ Intensity = …
Majority protein IDs	Gene names	Mol. weight [kDa]	Protein names	Razor + unique peptides cognate_1	Razor + unique peptides cognate_2	Razor + unique peptides cognate_3	Razor + unique peptides cognatebeads_1	Razor + unique peptides cognatebeads_2	Razor + unique peptides cognatebeads_3	Razor + unique peptides EL4_1	Razor + unique peptides EL4_2	Razor + unique peptides EL4_3	Razor + unique peptides noncognate_1	Razor + unique peptides noncognate_2	Razor + unique peptides noncognate_3	Razor + unique peptides noncognatebeads_1	Razor + unique peptides noncognatebeads_2	Razor + unique peptides noncognatebeads_3	Razor + unique peptides OT1_1	Razor + unique peptides OT1_2	Razor + unique peptides OT1_3	Sequence coverage cognate_1 [%]	Sequence coverage cognate_2 [%]	Sequence coverage cognate_3 [%]	Sequence coverage cognatebeads_1 [%]	Sequence coverage cognatebeads_2 [%]	Sequence coverage cognatebeads_3 [%]	Sequence coverage EL4_1 [%]	Sequence coverage EL4_2 [%]	Sequence coverage EL4_3 [%]	Sequence coverage noncognate_1 [%]	Sequence coverage noncognate_2 [%]	Sequence coverage noncognate_3 [%]	Sequence coverage noncognatebeads_1 [%]	Sequence coverage noncognatebeads_2 [%]	Sequence coverage noncognatebeads_3 [%]	Sequence coverage OT1_1 [%]	Sequence coverage OT1_2 [%]	Sequence coverage OT1_3 [%]	LFQ intensity cognate_1	LFQ intensity cognate_2	LFQ intensity cognate_3	LFQ intensity cognatebeads_1	LFQ intensity cognatebeads_2	LFQ intensity cognatebeads_3	LFQ intensity EL4_1	LFQ intensity EL4_2	LFQ intensity EL4_3	LFQ intensity noncognate_1
Q0VB35;P10146	Ccl1	10.276	C-C motif chemokine;C-C motif chemokine 1	4	3	3	4	6	5	1	0	0	0	1	2	3	3	4	2	2	1	33.7	33.7	33.7	40.2	48.9	40.2	8.7	0	0	0	16.3	17.4	32.6	33.7	40.2	31.5	17.4	16.3	738660	731660	888590	8792500	37855000	33884000	0	0	0	0
Q3U6F9;Q5QNW0;P10855	Ccl3	8.4485	C-C motif chemokine;C-C motif chemokine 3	2	4	4	5	5	5	0	1	0	3	2	0	3	3	1	0	0	0	32.4	62.2	62.2	67.6	67.6	67.6	0	32.4	0	60.8	32.4	0	60.8	60.8	29.7	0	0	0	0	1014300	1386200	2209400	7013800	1845100	0	0	0	1660100
Q5QNV9;P14097	Ccl4	10.168	C-C motif chemokine;C-C motif chemokine 4	1	4	4	4	4	3	2	0	1	2	0	1	2	2	3	1	3	1	8.7	47.8	47.8	50	50	47.8	41.3	0	16.3	41.3	0	22.8	25	25	47.8	25	47.8	16.3	0	1652200	1864600	6535400	24978000	8228300	2417700	0	0	1954300
Q542T1;P47993	Xcl1	12.467	Lymphotactin	2	2	2	2	3	3	0	0	1	1	1	0	1	1	1	1	0	0	19.3	19.3	19.3	19.3	28.1	28.1	0	0	10.5	10.5	10.5	0	10.5	10.5	10.5	10.5	0	0	921480	2126900	1858700	4911600	6861500	7003600	0	0	0	0
[truncated: 8 more columns]

## Sheet: All proteins quantified
Non cognate cells vs cognate cells = supernatant from OT1 CTLs conjugated with non-cognate vs cognate antigen-presenting tumour cells. Non cognate beads vs cognate beads = supernatant from OT1 CTLs conjugated with non-cognate vs cognate antigen-coated tumour beads. Uniprot ID = Uniprot accession number, Secreted? = if the protein is known to be secreted according to UniProt or the Human Protein A…
Uniprot ID	Gene name	Protein name	Secreted?	Function	SubLoc	KeyWord	PFam	GO	non cognate cells vs cognate cells ratio	non cognate cells vs cognate cells p.adj	non cognate cells vs cognate cells significant	non cognate beads vs cognate beads ratio	non cognate beads vs cognate beads p.adj	non cognate beads vs cognate beads significant
Q9DCS2	0610011F06Rik	UPF0585 protein C16orf13 homolog				Acetylation; Complete proteome; Reference proteome.	DUF938		-0.254	0.871	FALSE	0.102	0.961	FALSE
A2A8E2	0610037L13Rik	UPF0587 protein C1orf123 homolog				Complete proteome; Reference proteome.	DUF866		0.332	0.404	FALSE	0.136	0.79	FALSE
B2RXM7	1110005A23Rik;Sarnp	SAP domain-containing ribonucleoprotein		Binds both single-stranded and double-stranded DNA with higher affinity for the single-stranded form. Specifically binds to scaffold/matrix attachment region DNA. Also binds single- stranded RNA. Enhances RNA unwinding activity of DDX39A. May participate in important transcriptional or translational control of cell growth, metabolism and carcinogenesis. Component of the TREX complex which is thou…	Nucleus (By similarity). Nucleus speckle (By similarity).	Acetylation; Complete proteome; DNA-binding; mRNA transport; Nucleus;Reference proteome; RNA-binding; Transcription;Transcription regulation; Translation regulation; Transport.	SAP	GO:0016607;GO:0000346;GO:0003677;GO:0003723;GO:0006406;GO:0006355;GO:0006417;GO:0006351	0.16	0.88	FALSE	-1.1	0.273	FALSE
E9PZY8	1110037F02Rik;Kiaa1429	Protein virilizer homolog				Complete proteome; Reference proteome.			-0.859	0.279	FALSE	0.0879	0.942	FALSE
G3X8U3	2210016F16Rik					Complete proteome; Reference proteome.	DUF2419		0.93	0.491	FALSE	-1.28	0.374	FALSE
Q9CWU4	2410004B18Rik	UPF0690 protein C1orf52 homolog				Complete proteome; Phosphoprotein; Reference proteome.			-0.123	0.936	FALSE	-0.455	0.786	FALSE
E0CXN7	2510003E04Rik;Kbp	KIF1-binding protein				Complete proteome; Reference proteome.	KBP_C		-0.412	0.705	FALSE	-0.49	0.679	FALSE
B1AV75	2610301B20Rik	Protein C8orf37 homolog				Complete proteome; Reference proteome.			-0.523	0.447	FALSE	-0.0129	0.994	FALSE
Q8CFE2	2700029M09Rik	UPF0609 protein C4orf27 homolog				Acetylation; Complete proteome; Reference proteome.	DUF2228	GO:0005634	0.162	0.678	FALSE	-0.092	0.852	FALSE
Q4VA29	2700060E02Rik	UPF0568 protein C14orf166 homolog		Involved in modulation of mRNA transcription by Polymerase II (By similarity).	Nucleus (By similarity). Cytoplasm, perinuclear region (By similarity). Cytoplasm, cytoskeleton, microtubule organizing center, centrosome (By similarity). Note=May localize at the centrosome during mitosis (By similarity).	Acetylation; Complete proteome; Cytoplasm; Cytoskeleton; Nucleus;Reference proteome; Transcription; Transcription regulation.	RLL	GO:0005815;GO:0005634;GO:0048471;GO:0072669;GO:0000993;GO:0045944;GO:0006351	-1.15	0.161	FALSE	-1.12	0.19	FALSE
Q3TDI7	3110040N11Rik	UPF0235 protein C15orf40 homolog				Complete proteome; Reference proteome.	DUF167		2.01	0.0288	TRUE	1.2	0.171	FALSE
Q3TUY5	5730455P16Rik	Protein Njmu-R1				Complete proteome; Reference proteome.	Njmu-R1		0.0114	0.993	FALSE	-0.549	0.673	FALSE
E9QMK9	9030617O03Rik	UPF0317 protein C14orf159 homolog, mitochondrial				Complete proteome; Reference proteome.	DUF1445; DUF4392	GO:0005739	0.17	0.645	FALSE	0.296	0.436	FALSE
B2RWB7	9630033F20Rik;Tigar	Fructose-2,6-bisphosphatase TIGAR		Fructose-bisphosphatase hydrolyzing fructose-2,6- bisphosphate as well as fructose-1,6-bisphosphate. Inhibits glycolysis by reducing cellular levels of fructose-2,6- bisphosphate. May protect cells against reactive oxygen species and against apoptosis induced by tp53 (By similarity).		Complete proteome; Hydrolase; Reference proteome.	His_Phos_1	GO:0005622;GO:0004331;GO:0016311;GO:1901525;GO:2000378;GO:0010666	-0.168	0.793	FALSE	-0.0749	0.927	FALSE
A0A0A0MQL2	A430005L14Rik	UPF0688 protein C1orf174 homolog				Complete proteome; Reference proteome.			0.0224	0.982	FALSE	-0.41	0.714	FALSE
Q9D2R0	Aacs	Acetoacetyl-CoA synthetase		Activates acetoacetate to acetoacetyl-CoA. May be involved in utilizing ketone body for the fatty acid-synthesis during adipose tissue development (By similarity).	Cytoplasm, cytosol (By similarity).	ATP-binding; Complete proteome; Cytoplasm; Fatty acid metabolism;Ligase; Lipid metabolism; Nucleotide-binding; Reference proteome.	AMP-binding	GO:0005829;GO:0030729;GO:0005524;GO:0047760;GO:0060612;GO:0071397;GO:0071333;GO:0071394;GO:0006631;GO:0001889;GO:0032024;GO:0042493;GO:0045471;GO:0007584;GO:0034201;GO:0014074;GO:0042594;GO:0050872	-0.861	0.37	FALSE	-0.938	0.372	FALSE
Q3UHJ0-2	Aak1	AP2-associated protein kinase 1		Regulates clathrin-mediated endocytosis by phosphorylating the AP2M1/mu2 subunit of the adaptor protein complex 2 (AP-2) which ensures high affinity binding of AP-2 to cargo membrane proteins during the initial stages of endocytosis. Isoform 1 and isoform 2 display similar levels of kinase activity towards AP2M1. Regulates phosphorylation of other AP-2 subunits as well as AP-2 localization and AP…	Cell membrane; Peripheral membrane protein (By similarity). Membrane, clathrin-coated pit (By similarity). Note=Active when found in clathrin-coated pits at the plasma membrane. In neuronal cells, enriched at presynaptic terminals. In non-neuronal cells, enriched at leading edge of migrating cells (By similarity).	Acetylation; Alternative splicing; ATP-binding; Cell membrane;Coated pit; Complete proteome; Endocytosis; Kinase; Membrane;Nucleotide-binding; Phosphoprotein; Reference proteome;Serine/threonine-protein kinase; Transferase.	Pkinase	GO:0031252;GO:0030136;GO:0005905;GO:0019897;GO:0043195;GO:0035612;GO:0005524;GO:0005112;GO:0004674;GO:0006897;GO:0045747;GO:0046777;GO:0050821;GO:2000369;GO:0032880	-1.15	0.0957	FALSE	-0.883	0.209	FALSE
D3Z442	Aamdc	Mth938 domain-containing protein				Complete proteome; Reference proteome.	DUF498	GO:0043066;GO:0045600;GO:0045944	1.19	0.267	FALSE	0.262	0.858	FALSE
Q8K2C1	Aamp					Complete proteome; Reference proteome; Repeat; WD repeat.	WD40		-0.674	0.291	FALSE	-0.658	0.339	FALSE
Q3UD67	Aars	Alanine--tRNA ligase, cytoplasmic		Catalyzes the attachment of alanine to tRNA(Ala) in a two-step reaction: alanine is first activated by ATP to form Ala- AMP and then transferred to the acceptor end of tRNA(Ala). Also edits incorrectly charged tRNA(Ala) via its editing domain.	Cytoplasm (By similarity).	Acetylation; Aminoacyl-tRNA synthetase; ATP-binding;Complete proteome; Cytoplasm; Ligase; Metal-binding;Nucleotide-binding; Phosphoprotein; Protein biosynthesis;Reference proteome; RNA-binding; tRNA-binding; Ubl conjugation; Zinc.	DHHA1; tRNA-synt_2c; tRNA_SAD	GO:0005737;GO:0004813;GO:0016597;GO:0002161;GO:0005524;GO:0046872;GO:0000049;GO:0006419;GO:0021680;GO:0030968;GO:0001942;GO:0043524;GO:0050885;GO:0006457;GO:0043200;GO:0006400	-0.66	0.152	FALSE	-0.291	0.583	FALSE
Q3THG9	Aarsd1;Gm27029	Alanyl-tRNA editing protein Aarsd1		Functions in trans to edit the amino acid moiety from incorrectly charged Ser-tRNA(Ala).	Cytoplasm (By similarity).	Complete proteome; Cytoplasm; Metal-binding; Protein biosynthesis;Reference proteome; Zinc.	tRNA-synt_2c; tRNA_SAD	GO:0005737;GO:0004813;GO:0005524;GO:0046872;GO:0003676;GO:0002196;GO:0006419	-0.418	0.671	FALSE	-0.834	0.404	FALSE
Q6NXX7	Abce1	ATP-binding cassette sub-family E member 1		Antagonizes the binding of 2-5A (5'-phosphorylated 2',5'-linked oligoadenylates) by RNase L through direct interaction with RNase L and therefore inhibits its endoribonuclease activity. May play a central role in the regulation of mRNA turnover. Antagonizes the anti-viral effect of the interferon-regulated 2-5A/RNase L pathway (By similarity).	Cytoplasm (By similarity). Mitochondrion (By similarity). Note=Localized to clusters of virus formation at the plasma membrane (By similarity).	ATP-binding; Chaperone; Complete proteome; Cytoplasm; Mitochondrion;Nucleotide-binding; Reference proteome; Repeat.	ABC_tran; Fer4; RLI	GO:0005739;GO:0005524;GO:0016887;GO:0051536;GO:0006200	-0.563	0.413	FALSE	-0.797	0.281	FALSE
Q6P542	Abcf1	ATP-binding cassette sub-family F member 1		Required for efficient Cap- and IRES-mediated mRNA translation initiation. Not involved in the ribosome biogenesis (By similarity).	Cytoplasm (By similarity). Nucleus, nucleoplasm (By similarity). Nucleus envelope (By similarity).	Activator; ATP-binding; Complete proteome; Cytoplasm; Isopeptide bond;Nucleotide-binding; Nucleus; Phosphoprotein; Reference proteome;Repeat; Ubl conjugation.	ABC_tran	GO:0005635;GO:0005654;GO:0042788;GO:0005524;GO:0016887;GO:0043022;GO:0008494;GO:0006200;GO:0006413	-0.588	0.385	FALSE	-0.887	0.217	FALSE
Q3UVI9	Abcf2	ATP-binding cassette sub-family F member 2				Acetylation; ATP-binding; Complete proteome; Nucleotide-binding;Reference proteome; Repeat.	ABC_tran	GO:0005739;GO:0005524;GO:0016887;GO:0006200	-1.55	0.0551	FALSE	-1.46	0.0731	FALSE
A0A087WPF8	Abhd14b	Alpha/beta hydrolase domain-containing protein 14B				Complete proteome; Reference proteome.		GO:0005737;GO:0005730	-0.135	0.849	FALSE	0.103	0.912	FALSE
B7ZCU2	Abi1	Abl interactor 1				Complete proteome; Reference proteome; SH3 domain.	Abi_HHR; SH3_1	GO:0005737;GO:0005622;GO:0030027;GO:0030296;GO:0072673;GO:0035855;GO:0018108;GO:0001756	0.381	0.723	FALSE	0.016	0.995	FALSE
E9Q9Q7	Ablim1	Actin-binding LIM protein 1				Complete proteome; Reference proteome.	VHP	GO:0015629;GO:0003779;GO:0007411;GO:0007010;GO:0045944	0.954	0.213	FALSE	-0.481	0.587	FALSE
E9QMV2	Abracl	Costars family protein ABRACL				Complete proteome; Reference proteome.	Costars		-0.149	0.849	FALSE	-0.62	0.418	FALSE
Q3UKH3	Acaa2	3-ketoacyl-CoA thiolase, mitochondrial		Abolishes BNIP3-mediated apoptosis and mitochondrial damage (By similarity).	Mitochondrion (By similarity). Note=Colocalizes with BNIP3 in the mitochondria (By similarity).	Acetylation; Acyltransferase; Complete proteome;Fatty acid metabolism; Lipid metabolism; Mitochondrion;Phosphoprotein; Reference proteome; Transferase; Transit peptide.	Thiolase_C; Thiolase_N	GO:0005743;GO:0003988;GO:0006631;GO:1901029	1.05	0.0361	TRUE	0.759	0.117	FALSE
Q5SWU9	Acaca;Acacb	Acetyl-CoA carboxylase 1;Biotin carboxylase;Acetyl-CoA carboxylase 2		Catalyzes the rate-limiting reaction in the biogenesis of long-chain fatty acids. Carries out three functions: biotin carboxyl carrier protein, biotin carboxylase and carboxyltransferase (By similarity).	Cytoplasm.	Acetylation; Allosteric enzyme; Alternative promoter usage;ATP-binding; Biotin; Complete proteome; Cytoplasm;Direct protein sequencing; Fatty acid biosynthesis;Fatty acid metabolism; Ligase; Lipid biosynthesis; Lipid metabolism;Manganese; Metal-binding; Multifunctional enzyme; Nucleotide-binding;Phosphoprotein; Reference proteome.	ACC_central; Biotin_carb_C; Biotin_lipoyl; Carboxyl_trans; CPSase_L_chain; CPSase_L_D2	GO:0005829;GO:0005739;GO:0003989;GO:0005524;GO:0004075;GO:0046872;GO:0006084;GO:0006633;GO:0055088;GO:2001295;GO:0044268;GO:0051289;GO:0001894	-1.87	0.128	FALSE	-0.318	0.847	FALSE
A0A0R4J083	Acadl	Long-chain specific acyl-CoA dehydrogenase, mitochondrial			Mitochondrion matrix.	Acetylation; Complete proteome; FAD; Fatty acid metabolism;Flavoprotein; Lipid metabolism; Mitochondrion; Oxidoreductase;Reference proteome; Transit peptide.	Acyl-CoA_dh_1; Acyl-CoA_dh_M; Acyl-CoA_dh_N	GO:0005759;GO:0031966;GO:0005739;GO:0000062;GO:0050660;GO:0004466;GO:0016401;GO:0042413;GO:0019254;GO:0033539;GO:0042758;GO:0045717;GO:0046322;GO:0051289;GO:0090181;GO:0001659	1.75	0.00515	TRUE	0.571	0.315	FALSE
Q8K2H4	Acap1	Arf-GAP with coiled-coil, ANK repeat and PH domain-containing protein 1		GTPase-activating protein (GAP) for ADP ribosylation factor 6 (ARF6) required for clathrin-dependent export of proteins from recycling endosomes to trans-Golgi network and cell surface. Required for regulated export of ITGB1 from recycling endosomes to the cell surface and ITGB1-dependent cell migration (By similarity).	Recycling endosome membrane; Peripheral membrane protein; Cytoplasmic side (By similarity).	ANK repeat; Complete proteome; Endosome; Hydrolase; Lipid degradation;Lipid metabolism; Membrane; Metal-binding; Nitration;Reference proteome; Repeat; Transducer; Zinc; Zinc-finger.	Ank_2; ArfGap; PH	GO:0055038;GO:0008060;GO:0016787;GO:0004871;GO:0008270;GO:0016042;GO:0043547;GO:0032312	-0.605	0.487	FALSE	-1.93	0.0371	TRUE
D4AFX6	Acap2	Arf-GAP with coiled-coil, ANK repeat and PH domain-containing protein 2		GTPase-activating protein (GAP) for ADP ribosylation factor 6 (ARF6) (By similarity).	Endosome membrane; Peripheral membrane protein (By similarity).	Alternative splicing; ANK repeat; Coiled coil; Complete proteome;Endosome; GTPase activation; Membrane; Metal-binding; Phosphoprotein;Reference proteome; Repeat; Zinc; Zinc-finger.	Ank_2; ArfGap; PH	GO:0010008;GO:0008060;GO:0008270;GO:1990090;GO:0043547;GO:0036010;GO:0032312	-0.743	0.436	FALSE	-0.598	0.588	FALSE
Q3TQP7	Acat1	Acetyl-CoA acetyltransferase, mitochondrial		Plays a major role in ketone body metabolism (By similarity).	Mitochondrion (By similarity).	Acetylation; Acyltransferase; Complete proteome;Direct protein sequencing; Metal-binding; Mitochondrion; Potassium;Reference proteome; Transferase; Transit peptide.	Thiolase_C; Thiolase_N	GO:0005743;GO:0005759;GO:0003985;GO:0050662;GO:0046872;GO:0060612;GO:0007420;GO:0001889;GO:0072229;GO:0051260;GO:0009725;GO:0014070;GO:0042594	0.691	0.125	FALSE	0.628	0.181	FALSE
Q8CAY6	Acat2;Acat3	Acetyl-CoA acetyltransferase, cytosolic			Cytoplasm (By similarity).	Acetylation; Acyltransferase; Complete proteome; Cytoplasm;Direct protein sequencing; Reference proteome; Transferase.	Thiolase_C; Thiolase_N	GO:0005739;GO:0003985	0.509	0.324	FALSE	0.484	0.386	FALSE
Q6P9T6	Acbd3	Golgi resident protein GCP60		Involved in the maintenance of Golgi structure by interacting with giantin, affecting protein transport between the endoplasmic reticulum and Golgi (By similarity). Involved in hormone-induced steroid biosynthesis in testicular Leydig cells.	Golgi apparatus membrane; Peripheral membrane protein; Cytoplasmic side. Mitochondrion. Note=Also mitochondrial (via its interaction with PBR).	Acetylation; Coiled coil; Complete proteome; Golgi apparatus;Lipid biosynthesis; Lipid metabolism; Membrane; Mitochondrion;Phosphoprotein; Reference proteome; Steroid biosynthesis.	ACBP; GOLD_2	GO:0000139;GO:0016021;GO:0005739;GO:0000062;GO:0006694;GO:0006810	0.223	0.765	FALSE	0.111	0.908	FALSE
F6RJ39	Acin1	Apoptotic chromatin condensation inducer in the nucleus				Complete proteome; Reference proteome.	SAP	GO:0005730;GO:0003676;GO:0000166;GO:0006915	-0.204	0.723	FALSE	-0.299	0.625	FALSE
Q3V117	Acly	ATP-citrate synthase				Complete proteome; Reference proteome.	ATP-grasp_2; Citrate_synt; CoA_binding; Ligase_CoA	GO:0005739;GO:0005634;GO:0005886;GO:0005524;GO:0003878;GO:0048037;GO:0004775;GO:0006085;GO:0044262;GO:0008610	-0.696	0.154	FALSE	-0.476	0.361	FALSE
Q8VDC3	aco1;Aco1	Aconitate hydratase;Cytoplasmic aconitate hydratase		Iron sensor. Binds a 4Fe-4S cluster and functions as aconitase when cellular iron levels are high. Functions as mRNA binding protein that regulates uptake, sequestration and utilization of iron when cellular iron levels are low. Binds to iron-responsive elements (IRES) in target mRNA species when iron levels are low. Binding of a 4Fe-4S cluster precludes RNA binding (By similarity).	Cytoplasm.	4Fe-4S; Complete proteome; Cytoplasm; Iron; Iron-sulfur; Lyase;Metal-binding; Reference proteome; RNA-binding;Tricarboxylic acid cycle.	Aconitase; Aconitase_C	GO:0005829;GO:0005783;GO:0005794;GO:0005739;GO:0051539;GO:0003994;GO:0030350;GO:0046872;GO:0006879;GO:0006101;GO:0050892;GO:0009791;GO:0006417;GO:0010040;GO:0006099	-0.751	0.225	FALSE	-0.614	0.354	FALSE
Q99KI0	Aco2	Aconitate hydratase, mitochondrial		Catalyzes the isomerization of citrate to isocitrate via cis-aconitate (By similarity).	Mitochondrion (By similarity).	4Fe-4S; Acetylation; Complete proteome; Direct protein sequencing;Iron; Iron-sulfur; Isopeptide bond; Lyase; Metal-binding;Mitochondrion; Phosphoprotein; Pyrrolidone carboxylic acid;Reference proteome; Transit peptide; Tricarboxylic acid cycle;Ubl conjugation.	Aconitase; Aconitase_C	GO:0005739;GO:0005634;GO:0051538;GO:0051539;GO:0003994;GO:0005506;GO:0006101;GO:0006102;GO:0006099	0.561	0.16	FALSE	0.533	0.201	FALSE
Q9QYR9	Acot2;Acot1;Acot6;Acot4;Acot5;Acot3	Acyl-coenzyme A thioesterase 2, mitochondrial;Acyl-coenzyme A thioesterase 1;Acyl-coenzyme A thioesterase 6;Acyl-coenzyme A thioesterase 4;Acyl-coenzyme A thioesterase 3;Acyl-coenzyme A thioesterase 5		Acyl-CoA thioesterases are a group of enzymes that catalyze the hydrolysis of acyl-CoAs to the free fatty acid and coenzyme A (CoASH), providing the potential to regulate intracellular levels of acyl-CoAs, free fatty acids and CoASH. Most active on substrates with chain lengths ranging from C14-C20 (By similarity).	Mitochondrion matrix.	Acetylation; Complete proteome; Hydrolase; Mitochondrion;Reference proteome; Serine esterase; Transit peptide.	BAAT_C; Bile_Hydr_Trans	GO:0005759;GO:0005739;GO:0047617;GO:0016290;GO:0006637	0.197	0.761	FALSE	0.753	0.21	FALSE
Q91V12-2	Acot7	Cytosolic acyl coenzyme A thioester hydrolase				Complete proteome; Reference proteome.	4HBT	GO:0044297;GO:0005829;GO:0043005;GO:0016290;GO:0009062	-0.488	0.366	FALSE	-0.28	0.666	FALSE
Q4VAI2	Acp1	Low molecular weight phosphotyrosine protein phosphatase		Acts on tyrosine phosphorylated proteins, low-MW aryl phosphates and natural and synthetic acyl phosphates (By similarity).	Cytoplasm (By similarity).	3D-structure; Acetylation; Alternative splicing; Complete proteome;Cytoplasm; Hydrolase; Phosphoprotein; Polymorphism;Protein phosphatase; Reference proteome.	LMWPc	GO:0005737;GO:0009898;GO:0005634;GO:0003993;GO:0004726;GO:0035335	-0.0689	0.97	FALSE	0.178	0.938	FALSE
Q4VAI2	Acp1	Low molecular weight phosphotyrosine protein phosphatase		Acts on tyrosine phosphorylated proteins, low-MW aryl phosphates and natural and synthetic acyl phosphates (By similarity).	Cytoplasm (By similarity).	3D-structure; Acetylation; Alternative splicing; Complete proteome;Cytoplasm; Hydrolase; Phosphoprotein; Polymorphism;Protein phosphatase; Reference proteome.	LMWPc	GO:0005737;GO:0009898;GO:0005634;GO:0003993;GO:0004726;GO:0035335	-0.0689	0.97	FALSE	0.178	0.938	FALSE
Q8BP40	Acp6	Lysophosphatidic acid phosphatase type 6	Yes	Hydrolyzes lysophosphatidic acid (LPA) containing a medium length fatty acid chain to the corresponding monoacylglycerol. Has highest activity with lysophosphatidic acid containing myristate (C14:0), monounsaturated oleate (C18:1) or palmitate (C16:0), and lower activity with C18:0 and C6:0 lysophosphatidic acid (By similarity).	Mitochondrion (By similarity).	Alternative splicing; Complete proteome; Hydrolase; Lipid metabolism;Mitochondrion; Phospholipid metabolism; Reference proteome;Transit peptide.	His_Phos_2	GO:0005739;GO:0003993;GO:0052642;GO:2001311	-1.62	0.346	FALSE	0.298	0.905	FALSE
Q91YN3	Acsl4	Long-chain-fatty-acid--CoA ligase 4		Activation of long-chain fatty acids for both synthesis of cellular lipids, and degradation via beta-oxidation. Preferentially uses arachidonate and eicosapentaenoate as substrates.	Mitochondrion outer membrane; Single-pass type III membrane protein (By similarity). Peroxisome membrane; Single-pass type III membrane protein (By similarity). Microsome membrane; Single-pass type III membrane protein (By similarity). Endoplasmic reticulum membrane; Single-pass type III membrane protein (By similarity).	Alternative splicing; ATP-binding; Complete proteome;Endoplasmic reticulum; Fatty acid metabolism; Ligase;Lipid metabolism; Magnesium; Membrane; Microsome; Mitochondrion;Mitochondrion outer membrane; Nucleotide-binding; Peroxisome;Reference proteome; Signal-anchor; Transmembrane; Transmembrane helix.	AMP-binding	GO:0005789;GO:0016021;GO:0005811;GO:0005741;GO:0005739;GO:0043025;GO:0005778;GO:0047676;GO:0005524;GO:0004467;GO:0031957;GO:0060996;GO:0060136;GO:0015908;GO:0008610;GO:0032307;GO:0030307;GO:0019217;GO:0070672;GO:0007584;GO:0006641	-1.05	0.374	FALSE	-0.74	0.597	FALSE
Q9CXK3	Actc1;Actg2;Acta2	Actin, alpha cardiac muscle 1;Actin, gamma-enteric smooth muscle;Actin, aortic smooth muscle		Actins are highly conserved proteins that are involved in various types of cell motility and are ubiquitously expressed in all eukaryotic cells.	Cytoplasm, cytoskeleton.	Acetylation; ATP-binding; Complete proteome; Cytoplasm; Cytoskeleton;Direct protein sequencing; Methylation; Muscle protein;Nucleotide-binding; Oxidation; Reference proteome.	Actin	GO:0042643;GO:0070062;GO:0031674;GO:0005524;GO:0016887;GO:0033275;GO:0060048;GO:0055008;GO:0055003;GO:0043066;GO:0042493;GO:0045471;GO:0030240	-0.146	0.884	FALSE	0.206	0.871	FALSE
Q9QZ83	Actg1			NA	NA	NA	NA	NA	-2.46	0.0288	TRUE	-0.537	0.657	FALSE
Q4KL81	Actg1	Actin, cytoplasmic 2;Actin, cytoplasmic 2, N-terminally processed				Complete proteome; Reference proteome.	Actin	GO:0043034;GO:0031941;GO:0005200;GO:0045214	0.292	0.481	FALSE	0.348	0.439	FALSE
Q505L1	Actl6a;Actl6b	Actin-like protein 6A;Actin-like protein 6B				Complete proteome; Reference proteome.	Actin	GO:0031011;GO:0035267;GO:0005634;GO:0005886;GO:0016514;GO:0003682;GO:0006338;GO:0043968;GO:0043967;GO:0003407	0.228	0.626	FALSE	0.217	0.685	FALSE
A1BN54	Actn1	Alpha-actinin-1				Actin-binding; Calcium; Complete proteome; Reference proteome; Repeat.	CH; EF-hand_6; EFhand_Ca_insen; Spectrin	GO:0005916;GO:0030018;GO:0051015;GO:0005509;GO:0003725	0.0698	0.887	FALSE	-0.08	0.903	FALSE
Q3ULT2	Actn4	Alpha-actinin-4				Actin-binding; Complete proteome; Reference proteome; Repeat.	CH; Spectrin	GO:0030863;GO:0030018;GO:0051015	-0.0946	0.824	FALSE	0.252	0.552	FALSE
Q9QZB7	Actr10	Actin-related protein 10			Cytoplasm, cytoskeleton (By similarity).	Complete proteome; Cytoplasm; Cytoskeleton; Reference proteome.	Actin	GO:0005737;GO:0005869;GO:0007018	-0.219	0.833	FALSE	-0.641	0.545	FALSE
P61164	Actr1a	Alpha-centractin		Component of a multi-subunit complex involved in microtubule based vesicle motility. It is associated with the centrosome.	Cytoplasm, cytoskeleton. Cytoplasm, cytoskeleton, microtubule organizing center, centrosome.	Acetylation; ATP-binding; Complete proteome; Cytoplasm; Cytoskeleton;Nucleotide-binding; Reference proteome.	Actin	GO:0005813;GO:0005737;GO:0005524	0.232	0.615	FALSE	0.035	0.959	FALSE
Q8R5C5	Actr1b	Beta-centractin		Component of a multi-subunit complex involved in microtubule based vesicle motility. It is associated with the centrosome (By similarity).	Cytoplasm, cytoskeleton. Cytoplasm, cytoskeleton, microtubule organizing center, centrosome (By similarity).	Acetylation; ATP-binding; Complete proteome; Cytoplasm; Cytoskeleton;Direct protein sequencing; Nitration; Nucleotide-binding;Reference proteome.	Actin	GO:0005813;GO:0005737;GO:0005524	-1.2	0.554	FALSE	-1.24	0.588	FALSE
Q5SW83	Actr2	Actin-related protein 2		Functions as ATP-binding component of the Arp2/3 complex which is involved in regulation of actin polymerization and together with an activating nucleation-promoting factor (NPF) mediates the formation of branched actin networks. Seems to contact the pointed end of the daughter actin filament (By similarity).	Cytoplasm, cytoskeleton (By similarity). Cell projection (By similarity).	Acetylation; Actin-binding; ATP-binding; Cell projection;Complete proteome; Cytoplasm; Cytoskeleton; Direct protein sequencing;Nucleotide-binding; Reference proteome.	Actin	GO:0030478;GO:0005885;GO:0042995;GO:0005524;GO:0030036;GO:0034314;GO:0008356;GO:0016482;GO:0007163;GO:0033206;GO:0051653	-0.316	0.641	FALSE	-0.171	0.841	FALSE
Q3ULF7	Actr3;Actr3b	Actin-related protein 3;Actin-related protein 3B		Functions as ATP-binding component of the Arp2/3 complex which is involved in regulation of actin polymerization and together with an activating nucleation-promoting factor (NPF) mediates the formation of branched actin networks. Seems to contact the pointed end of the daughter actin filament. Plays a role in ciliogenesis (By similarity).	Cytoplasm, cytoskeleton (By similarity). Cell projection (By similarity). Note=In pre-apoptotic cells, colocalizes with MEFV in large specks (pyroptosomes) (By similarity).	Acetylation; Actin-binding; ATP-binding; Cell projection;Cilium biogenesis/degradation; Complete proteome; Cytoplasm;Cytoskeleton; Direct protein sequencing; Nucleotide-binding;Reference proteome.	Actin	GO:0060076;GO:0000139;GO:0030056;GO:0030027;GO:0002102;GO:0005524;GO:0008356;GO:0060271;GO:0007163;GO:0033206;GO:0030838;GO:0050775;GO:0051491;GO:0010592;GO:0045666;GO:0043519;GO:0046677;GO:0009743;GO:0051653	-0.00972	0.982	FALSE	-0.0945	0.871	FALSE
A0A0R4J050	Acy1	Aminoacylase-1		Involved in the hydrolysis of N-acylated or N-acetylated amino acids (except L-aspartate) (By similarity).	Cytoplasm (By similarity).	Complete proteome; Cytoplasm; Hydrolase; Metal-binding;Reference proteome; Zinc.	M20_dimer; Peptidase_M20	GO:0005737;GO:0004046;GO:0046872;GO:0008237;GO:0006520;GO:0006508	0.274	0.462	FALSE	0.28	0.498	FALSE
Q4VAF0	Acyp1	Acylphosphatase;Acylphosphatase-1	Yes			Complete proteome; Hydrolase; Reference proteome.	Acylphosphatase	GO:0003998	0.184	0.902	FALSE	-0.365	0.838	FALSE
Q4FK28	Ada	Adenosine deaminase		Catalyzes the hydrolytic deamination of adenosine and 2- deoxyadenosine. Plays an important role in purine metabolism and in adenosine homeostasis. Modulates signaling by extracellular adenosine, and so contributes indirectly to cellular signaling events. Acts as a positive regulator of T-cell coactivation, by binding DPP4. Its interaction with DPP4 regulates lymphocyte- epithelial cell adhesion …	Cell membrane; Peripheral membrane protein; Extracellular side (By similarity). Cell junction (By similarity). Cytoplasmic vesicle lumen. Cytoplasm (By similarity). Note=Colocalized with DPP4 at the cell junction in lymphocyte- epithelial cell adhesion (By similarity).	3D-structure; Acetylation; Cell adhesion; Cell junction;Cell membrane; Complete proteome; Cytoplasm; Cytoplasmic vesicle;Hydrolase; Membrane; Metal-binding; Nucleotide metabolism;Reference proteome; Zinc.	A_deaminase	GO:0030054;GO:0060205;GO:0005829;GO:0032839;GO:0009897;GO:0005615;GO:0005764;GO:0043025;GO:0004000;GO:0001883;GO:0008270;GO:0006154;GO:0007568;GO:0007155;GO:0046061;GO:0006157;GO:0048566;GO:0002314;GO:0001821;GO:0043103;GO:0046103;GO:0001889;GO:0048286;GO:0060169;GO:0042323;GO:0050728;GO:0002686;GO:0002906;GO:0070256;GO:0060407;GO:0070244;GO:0048541;GO:0001890;GO:0046638;GO:0030890;GO:0050850;GO:…	-0.165	0.72	FALSE	-0.0485	0.938	FALSE
O35598	Adam10	Disintegrin and metalloproteinase domain-containing protein 10	Yes	Cleaves the membrane-bound precursor of TNF-alpha to its mature soluble form. Responsible for the proteolytical release of soluble JAM3 from endothelial cells surface (By similarity). Responsible for the proteolytic release of several other cell- surface proteins, including heparin-binding epidermal growth-like factor, ephrin-A2 and for constitutive and regulated alpha- secretase cleavage of amyl…	Membrane; Single-pass type I membrane protein.	Cleavage on pair of basic residues; Complete proteome; Disulfide bond;Glycoprotein; Hydrolase; Membrane; Metal-binding; Metalloprotease;Notch signaling pathway; Protease; Reference proteome; SH3-binding;Signal; Transmembrane; Transmembrane helix; Zinc; Zymogen.	Disintegrin; Pep_M12B_propep	GO:0009986;GO:0005798;GO:0016021;GO:0005634;GO:0005886;GO:0014069;GO:0004222;GO:0019901;GO:0042169;GO:0008270;GO:0051089;GO:0001701;GO:0006509;GO:0042117;GO:0007162;GO:0007220;GO:0007219;GO:0006913;GO:0051088;GO:0030307;GO:0008284;GO:0010820;GO:0006468;GO:0034612	0.511	0.3	FALSE	0.86	0.0952	FALSE
Q3UH67	Adam19	Disintegrin and metalloproteinase domain-containing protein 19		Participates in the proteolytic processing of beta-type neuregulin isoforms which are involved in neurogenesis and synaptogenesis, suggesting a regulatory role in glial cell. Also cleaves alpha-2 macroglobulin. May be involved in osteoblast differentiation and/or osteoblast activity in bone (By similarity).	Membrane; Single-pass type I membrane protein.	Cleavage on pair of basic residues; Complete proteome; Disulfide bond;EGF-like domain; Glycoprotein; Hydrolase; Membrane; Metal-binding;Metalloprotease; Protease; Reference proteome; SH3-binding; Signal;Transmembrane; Transmembrane helix; Zinc; Zymogen.	ADAM_CR; Disintegrin; Pep_M12B_propep; Reprolysin	GO:0016021;GO:0004222;GO:0008270;GO:0007507;GO:0006509	0.307	0.805	FALSE	0.415	0.754	FALSE
Q3U7G2	Adam8	Disintegrin and metalloproteinase domain-containing protein 8	Yes			Complete proteome; Disulfide bond; Reference proteome.	ADAM_CR; Disintegrin; Pep_M12B_propep; Reprolysin	GO:0005886;GO:0004222;GO:0008237;GO:0008270;GO:0016337;GO:0006508	-0.0271	0.981	FALSE	-0.866	0.416	FALSE
Q6PAT0	Adat3	Probable inactive tRNA-specific adenosine deaminase-like protein 3				Acetylation; Complete proteome; Metal-binding; Reference proteome;tRNA processing; Zinc.	dCMP_cyt_deam_1	GO:0016787;GO:0008270;GO:0008033	-1.34	0.0682	FALSE	0.00789	0.997	FALSE
F8WHZ9	Add1;Add2	Alpha-adducin;Beta-adducin				Complete proteome; Reference proteome.	Aldolase_II	GO:0005856;GO:0016020;GO:0005198;GO:0000902;GO:0006884;GO:0030218;GO:0020027;GO:0048873;GO:0001701;GO:0035264	-0.0848	0.902	FALSE	-1.09	0.0952	FALSE
Q8BM29	Add3	Gamma-adducin		Membrane-cytoskeleton-associated protein that promotes the assembly of the spectrin-actin network. Binds to calmodulin.	Cytoplasm, cytoskeleton. Cell membrane; Peripheral membrane protein; Cytoplasmic side.	Acetylation; Actin-binding; Alternative splicing; Calmodulin-binding;Cell membrane; Complete proteome; Cytoplasm; Cytoskeleton; Membrane;Phosphoprotein; Reference proteome; Ubl conjugation.	Aldolase_II	GO:0005938;GO:0005911;GO:0000794;GO:0005856;GO:0016020;GO:0005886;GO:0005198	-1.12	0.393	FALSE	-1.42	0.322	FALSE
E9QMJ5	Adgre5;Cd97	CD97 antigen				Cell membrane; Complete proteome; Disulfide bond; EGF-like domain;Membrane; Reference proteome; Transmembrane; Transmembrane helix.	7tm_2; EGF_CA; GPS	GO:0016021;GO:0005886;GO:0005509;GO:0004930;GO:0004888;GO:0007218	0.275	0.849	FALSE	-1.2	0.395	FALSE
Q3UKA4	Adh1	Alcohol dehydrogenase 1			Cytoplasm.	Acetylation; Complete proteome; Cytoplasm; Metal-binding; NAD;Oxidoreductase; Reference proteome; Zinc.	ADH_N; ADH_zinc_N	GO:0005739;GO:0004022;GO:0008270;GO:0048149;GO:0006068;GO:0032526;GO:0033574;GO:0042573;GO:0042572	0.0396	0.97	FALSE	-0.21	0.865	FALSE
Q6P5I3	Adh5;Adh7	S-(hydroxymethyl)glutathione dehydrogenase;Alcohol dehydrogenase class-3;Alcohol dehydrogenase class 4 mu/sigma chain		Could function in retinol oxidation for the synthesis of retinoic acid, a hormone important for cellular differentiation.	Cytoplasm.	Complete proteome; Cytoplasm; Metal-binding; NAD; Oxidoreductase;Reference proteome; Zinc.	ADH_N; ADH_zinc_N	GO:0005737;GO:0005576;GO:0005622;GO:0005730;GO:0004022;GO:0004024;GO:0004031;GO:0035276;GO:0019841;GO:0004745;GO:0008270;GO:0006068;GO:0006069;GO:1900116;GO:0010430;GO:2000272;GO:0009617;GO:0045471;GO:0042573;GO:0042572	-0.0334	0.944	FALSE	0.0626	0.918	FALSE
Q99JT9	Adi1	1,2-dihydroxy-3-keto-5-methylthiopentene dioxygenase	Yes	Catalyzes the formation of formate and 2-keto-4- methylthiobutyrate (KMTB) from 1,2-dihydroxy-3-keto-5- methylthiopentene (DHK-MTPene). Also down-regulates cell migration mediated by MMP14 (By similarity).	Cytoplasm (By similarity). Nucleus (By similarity). Cell membrane; Peripheral membrane protein; Cytoplasmic side (By similarity). Note=Localizes to the plasma membrane when complexed to MMP14 (By similarity).	3D-structure; Amino-acid biosynthesis; Cell membrane;Complete proteome; Cytoplasm; Dioxygenase; Iron; Membrane;Metal-binding; Methionine biosynthesis; Nucleus; Oxidoreductase;Reference proteome.	ARD	GO:0005737;GO:0005794;GO:0005634;GO:0005886;GO:0010309;GO:0005506;GO:0016491;GO:0019509	-0.0857	0.83	FALSE	0.291	0.447	FALSE
P55264	Adk	Adenosine kinase		ATP dependent phosphorylation of adenosine and other related nucleoside analogs to monophosphate derivatives. Serves as a potential regulator of concentrations of extracellular adenosine and intracellular adenine nucleotides.	Isoform Long: Nucleus (By similarity).	Alternative splicing; ATP-binding; Complete proteome; Cytoplasm;Kinase; Magnesium; Metal-binding; Nucleotide-binding; Nucleus;Phosphoprotein; Purine salvage; Reference proteome; Transferase.	PfkB	GO:0005829;GO:0005634;GO:0004001;GO:0005524;GO:0046872;GO:0016773;GO:0046085;GO:0044209;GO:0032922;GO:0006175;GO:0010613;GO:0042102;GO:0006166;GO:0044342	-0.115	0.828	FALSE	-0.13	0.833	FALSE
Q6ZQ47	Adnp	Activity-dependent neuroprotector homeobox protein		Potential transcription factor. May mediate some of the neuroprotective peptide VIP-associated effects involving normal growth and cancer proliferation.	Nucleus (Potential).	Acetylation; Complete proteome; DNA-binding; Homeobox; Metal-binding;Nucleus; Phosphoprotein; Reference proteome; Repeat; Transcription;Transcription regulation; Zinc; Zinc-finger.	Homeobox	GO:0005615;GO:0005634;GO:0003682;GO:0046872;GO:0043565;GO:0003700;GO:0043524;GO:0006351	-0.994	0.535	FALSE	-1.35	0.43	FALSE
Q3U5N4	Adprh	[Protein ADP-ribosylarginine] hydrolase		Catalyzes the reverse reaction of mono-ADP-ribosylation.		Complete proteome; Hydrolase; Magnesium; Reference proteome.	ADP_ribosyl_GH	GO:0003875;GO:0000287;GO:0006464;GO:0051725	-0.312	0.808	FALSE	-0.64	0.625	FALSE
Q8CG72	Adprhl2	Poly(ADP-ribose) glycohydrolase ARH3	Yes	Poly(ADP-ribose) synthesized after DNA damage is only present transiently and is rapidly degraded by poly(ADP-ribose) glycohydrolase. Poly(ADP-ribose) metabolism may be required for maintenance of the normal function of neuronal cells. Generates ADP-ribose from poly-(ADP-ribose), but does not hydrolyze ADP- ribose-arginine, -cysteine, -diphthamide, or -asparagine bonds. Due to catalytic inactivit…	Cytoplasm. Mitochondrion matrix (By similarity). Nucleus.	3D-structure; Alternative splicing; Complete proteome; Cytoplasm;Hydrolase; Magnesium; Metal-binding; Mitochondrion; Nucleus;Reference proteome; Transit peptide.	ADP_ribosyl_GH	GO:0005759;GO:0005634;GO:0046872;GO:0004649;GO:0008152	0.778	0.564	FALSE	-0.142	0.944	FALSE
Q99KS6-2	Adprm	Manganese-dependent ADP-ribose/CDP-alcohol diphosphatase		Hydrolyzes ADP-ribose, IDP-ribose, CDP-glycerol, CDP- choline and CDP-ethanolamine, but not other non-reducing ADP- sugars or CDP-glucose. May be involved in immune cell signaling as suggested by the second-messenger role of ADP-ribose, which activates TRPM2 as a mediator of oxidative/nitrosative stress (By similarity).		Acetylation; Alternative splicing; Complete proteome; Hydrolase;Metal-binding; Reference proteome; Zinc.	Metallophos	GO:0047631;GO:0047734;GO:0046872;GO:0008152	0.105	0.856	FALSE	-0.337	0.574	FALSE
Q7TS64	Adrbk1;Adrbk2	Beta-adrenergic receptor kinase 1;Beta-adrenergic receptor kinase 2				ATP-binding; Complete proteome; Kinase; Nucleotide-binding; Receptor;Reference proteome; Serine/threonine-protein kinase; Transferase.	PH; Pkinase; RGS	GO:0005737;GO:0016020;GO:0005524;GO:0004703;GO:0060048;GO:0002029;GO:0007186;GO:0007507;GO:0045988;GO:0003108;GO:0018105;GO:0018107;GO:0031623;GO:0002026;GO:0007217;GO:0038032	-0.874	0.562	FALSE	-0.486	0.797	FALSE
Q3TMB8	Adsl	Adenylosuccinate lyase				Complete proteome; Reference proteome.		GO:0005739;GO:0004018;GO:0006167	-0.11	0.889	FALSE	-0.133	0.897	FALSE
B9EIE9	Adss	Adenylosuccinate synthetase isozyme 2;Adenylosuccinate synthetase		Plays an important role in the de novo pathway and in the salvage pathway of purine nucleotide biosynthesis. Catalyzes the first committed step in the biosynthesis of AMP from IMP.	Cytoplasm.	Complete proteome; Cytoplasm; GTP-binding; Ligase; Magnesium;Metal-binding; Nucleotide-binding; Purine biosynthesis;Reference proteome.	Adenylsucc_synt	GO:0005829;GO:0005886;GO:0004019;GO:0005525;GO:0000287;GO:0044208;GO:0006167;GO:0006531;GO:0071257;GO:0006184;GO:0046040;GO:0060359;GO:0014074	0.127	0.754	FALSE	0.0564	0.914	FALSE
Q3UBP0	Adssl1	Adenylosuccinate synthetase isozyme 1		Component of the purine nucleotide cycle (PNC), which interconverts IMP and AMP to regulate the nucleotide levels in various tissues, and which contributes to glycolysis and ammoniagenesis. Catalyzes the first commited step in the biosynthesis of AMP from IMP (By similarity).	Cytoplasm (By similarity).	Complete proteome; Cytoplasm; GTP-binding; Ligase; Magnesium;Metal-binding; Nucleotide-binding; Purine biosynthesis;Reference proteome.	Adenylsucc_synt	GO:0005737;GO:0004019;GO:0005525;GO:0000287;GO:0044208;GO:0006163	-2.44	0.0155	TRUE	-0.39	0.723	FALSE
I6L987	Aebp2	Zinc finger protein AEBP2		May interact with and stimulate the activity of the PRC2 complex, which methylates 'Lys-9' and 'Lys-27' residues of histone H3 (By similarity). DNA-binding transcriptional repressor.	Nucleus (Probable).	Acetylation; Alternative splicing; Chromatin regulator;Complete proteome; DNA-binding; Metal-binding; Nucleus;Phosphoprotein; Reference proteome; Repeat; Repressor; Transcription;Transcription regulation; Zinc; Zinc-finger.		GO:0035098;GO:0003677;GO:0046872;GO:0003714;GO:0016568;GO:0006355;GO:0006351	0.206	0.761	FALSE	-1.73	0.00986	TRUE
B7ZNK6	Aga	N(4)-(beta-N-acetylglucosaminyl)-L-asparaginase;Glycosylasparaginase alpha chain;Glycosylasparaginase beta chain	Yes	Cleaves the GlcNAc-Asn bond which joins oligosaccharides to the peptide of asparagine-linked glycoproteins.	Lysosome.	Autocatalytic cleavage; Complete proteome; Disulfide bond;Glycoprotein; Hydrolase; Lysosome; Protease; Reference proteome;Signal.	Asparaginase_2	GO:0005783;GO:0005764;GO:0003948;GO:0008233;GO:0006517;GO:0051604;GO:0006508	1.92	0.178	FALSE	-0.0547	0.984	FALSE
Q3UHD9-2	Agap2	Arf-GAP with GTPase, ANK repeat and PH domain-containing protein 2		GTPase-activating protein (GAP) for ARF1 and ARF5, which also shows strong GTPase activity. Participates in the prevention of neuronal apoptosis by enhancing PI3 kinase activity. Aids the coupling of metabotropic glutamate receptor 1 (GRM1) to cytoplasmic PI3 kinase by interacting with Homer scaffolding proteins, and also seems to mediate anti-apoptotic effects of NGF by activating nuclear PI3 ki…	Cytoplasm. Nucleus (By similarity).	Alternative splicing; ANK repeat; Complete proteome; Cytoplasm;GTP-binding; GTPase activation; Metal-binding; Nucleotide-binding;Nucleus; Phosphoprotein; Reference proteome; Repeat; Zinc;Zinc-finger.	Ank_2; ArfGap; Miro; PH	GO:0005739;GO:0005730;GO:0008060;GO:0005525;GO:0030295;GO:0008270;GO:0060749;GO:0043066;GO:2001240;GO:0043547;GO:0046427;GO:0033601;GO:0045944;GO:0032312;GO:0007264	0.368	0.719	FALSE	-0.942	0.346	FALSE
A0A087WNV1	Agfg1	Arf-GAP domain and FG repeat-containing protein 1		Required for vesicle docking or fusion during acrosome biogenesis. May play a role in RNA trafficking or localization.	Nucleus (By similarity). Cytoplasmic vesicle (By similarity). Note=Associated with the cytosolic surface of proacrosomic vesicles of early round spermatids.	Alternative splicing; Complete proteome; Cytoplasmic vesicle;Developmental protein; Differentiation; DNA-binding; Glycoprotein;Metal-binding; Nucleus; Phosphoprotein; Reference proteome; Repeat;Spermatogenesis; Transport; Zinc; Zinc-finger.	ArfGap	GO:0042995;GO:0016023;GO:0043025;GO:0005634;GO:0008060;GO:0003677;GO:0008270;GO:0001675;GO:0045109;GO:0007275;GO:0043547;GO:0032312;GO:0007289;GO:0006810	0.262	0.569	FALSE	0.327	0.517	FALSE
Q8CJG0	Ago2;Ago5;Ago1;Ago3;Ago4	Protein argonaute-2;Piwi-like protein;Protein argonaute;Protein argonaute-1;Protein argonaute-3;Protein argonaute-4		Required for RNA-mediated gene silencing (RNAi) by the RNA-induced silencing complex (RISC). The 'minimal RISC' appears to include AGO2 bound to a short guide RNA such as a microRNA (miRNA) or short interfering RNA (siRNA). These guide RNAs direct RISC to complementary mRNAs that are targets for RISC-mediated gene silencing. The precise mechanism of gene silencing depends on the degree of complem…	Cytoplasm, P-body (By similarity). Nucleus (By similarity). Note=Translational repression of mRNAs results in their recruitment to P-bodies. Translocation to the nucleus requires IMP8 (By similarity).	Complete proteome; Cytoplasm; Developmental protein; Differentiation;Endonuclease; Hydrolase; Hydroxylation; Metal-binding; Nitration;Nuclease; Nucleus; Reference proteome; Repressor; Ribonucleoprotein;RNA-binding; RNA-mediated gene silencing; Transcription;Transcription regulation; Translation regulation.	DUF1785; PAZ; Piwi	GO:0000932;GO:0035068;GO:0005845;GO:0005634;GO:0005844;GO:0016442;GO:0070551;GO:0046872;GO:0035198;GO:0003729;GO:0000340;GO:0035197;GO:0030154;GO:0035279;GO:0035278;GO:0045947;GO:1900153;GO:0060213;GO:0009791;GO:0031054;GO:0006355;GO:0006351	-1.31	0.144	FALSE	-0.822	0.397	FALSE
A2AL49	Agps	Alkyldihydroxyacetonephosphate synthase, peroxisomal	Yes			Complete proteome; Reference proteome.	FAD-oxidase_C; FAD_binding_4	GO:0005739;GO:0008609;GO:0050660;GO:0008762;GO:0008610	-0.51	0.761	FALSE	-0.867	0.617	FALSE
Q8CJF7	Ahctf1	Protein ELYS		Required for the assembly of a functional nuclear pore complex (NPC) on the surface of chromosomes as nuclei form at the end of mitosis. May initiate NPC assembly by binding to chromatin and recruiting the Nup107-160 subcomplex of the NPC. Also required for the localization of the Nup107-160 subcomplex of the NPC to the kinetochore during mitosis and for the completion of cytokinesis (By similari…	Chromosome, centromere, kinetochore (By similarity). Nucleus, nucleoplasm (By similarity). Nucleus, nuclear pore complex. Nucleus matrix. Cytoplasm. Note=Localizes to the nuclear pore complex (NPC) throughout interphase. Localizes to the kinetochore from prophase, and this appears to require the Nup107-160 subcomplex of the NPC. Localizes to the periphery of chromatin from late anaphase (By simil…	3D-structure; Acetylation; Cell cycle; Cell division; Centromere;Chromosome; Complete proteome; Cytoplasm; Developmental protein;DNA-binding; Kinetochore; Mitosis; mRNA transport;Nuclear pore complex; Nucleus; Phosphoprotein; Protein transport;Reference proteome; Transcription; Translocation; Transport.	ELYS	GO:0000785;GO:0000777;GO:0005737;GO:0016363;GO:0031965;GO:0031080;GO:0005654;GO:0003677;GO:0003700;GO:0000910;GO:0030097;GO:0007067;GO:0051028;GO:0051292;GO:0045893;GO:0015031;GO:0006351	0.101	0.884	FALSE	-0.602	0.375	FALSE
Q3U4D1	Ahcy	Adenosylhomocysteinase				Complete proteome; Reference proteome.	AdoHcyase	GO:0004013;GO:0006730	-0.425	0.465	FALSE	-0.46	0.473	FALSE
Q80TQ9	Ahcyl2	Adenosylhomocysteinase;Putative adenosylhomocysteinase 3	Yes			Complete proteome; Hydrolase; NAD; One-carbon metabolism;Reference proteome.	AdoHcyase; AdoHcyase_NAD	GO:0004013;GO:0006730	-0.949	0.0857	FALSE	-0.513	0.376	FALSE
E9Q616	Ahnak					Complete proteome; Reference proteome.	PDZ	GO:0015629;GO:0044291;GO:0043034;GO:0005829;GO:0005634;GO:0005886;GO:0031982;GO:0097493;GO:0051259;GO:0043484	0.48	0.383	FALSE	-0.0155	0.99	FALSE
Q3TL79	Ahsa1	Activator of 90 kDa heat shock protein ATPase homolog 1		Co-chaperone that stimulates HSP90 ATPase activity. May affect a step in the endoplasmic reticulum to Golgi trafficking (By similarity).	Cytoplasm, cytosol (By similarity). Endoplasmic reticulum (By similarity). Note=May transiently interact with the endoplasmic reticulum (By similarity).	Acetylation; Chaperone; Complete proteome; Cytoplasm;Endoplasmic reticulum; Phosphoprotein; Reference proteome;Stress response.	Aha1_N; AHSA1	GO:0005737;GO:0005829;GO:0005783;GO:0001671;GO:0006457;GO:0006950	-0.314	0.548	FALSE	-0.219	0.727	FALSE
B1AU25	Aifm1;Pdcd8	Apoptosis-inducing factor 1, mitochondrial				Complete proteome; Reference proteome.	Pyr_redox; Pyr_redox_2	GO:0005829;GO:0005758;GO:0005741;GO:0005634;GO:0004174;GO:0050660;GO:0006309;GO:0008637;GO:0045454;GO:0051402	-0.239	0.525	FALSE	0.18	0.687	FALSE
Q8C2S1	Aim1					Complete proteome; Reference proteome; Repeat.	Crystall; Ricin_B_lectin		1.25	0.0589	FALSE	0.314	0.681	FALSE
Q3UZG4	Aimp1	Aminoacyl tRNA synthase complex-interacting multifunctional protein 1;Endothelial monocyte-activating polypeptide 2	Yes			Complete proteome; Reference proteome.	tRNA_bind	GO:0017101;GO:0009986;GO:0000049;GO:0007267;GO:0050900;GO:0001937	-0.0614	0.892	FALSE	-0.0684	0.911	FALSE
Q8R010	Aimp2	Aminoacyl tRNA synthase complex-interacting multifunctional protein 2		Required for assembly and stability of the aminoacyl- tRNA synthase complex. Mediates ubiquitination and degradation of FUBP1, a transcriptional activator of MYC, leading to MYC down- regulation which is required for aveolar type II cell differentiation. Blocks MDM2-mediated ubiquitination and degradation of p53/TP53. Functions as a proapoptotic factor.	Cytoplasm, cytosol. Nucleus. Note=Following DNA damage, dissociates from the aminoacyl-tRNA synthase complex and translocates from the cytoplasm to the nucleus.	Apoptosis; Complete proteome; Cytoplasm; Developmental protein;Differentiation; Nucleus; Phosphoprotein; Protein biosynthesis;Reference proteome; Ubl conjugation.		GO:0005829;GO:0005634;GO:0006915;GO:0008285;GO:0031398;GO:0006412;GO:0060510	0.482	0.36	FALSE	-0.0283	0.973	FALSE
O08915	Aip	AH receptor-interacting protein		May play a positive role in AHR-mediated (aromatic hydrocarbon receptor) signaling, possibly by influencing its receptivity for ligand and/or its nuclear targeting.	Cytoplasm.	Complete proteome; Cytoplasm; Direct protein sequencing;Reference proteome; Repeat; TPR repeat.	FKBP_C	GO:0005737;GO:0016020;GO:0005634;GO:0005886;GO:0003712;GO:0051082;GO:0051344;GO:0022417;GO:0006626;GO:0010738;GO:0006805	-0.341	0.462	FALSE	0.226	0.681	FALSE
Q9WTP6-2	Ak2	Adenylate kinase 2, mitochondrial;Adenylate kinase 2, mitochondrial, N-terminally processed				Complete proteome; Reference proteome.		GO:0005743;GO:0097226;GO:0005524;GO:0019205;GO:0006139;GO:0016310	0.4	0.515	FALSE	0.488	0.467	FALSE
B2RRE0	Akap12	A-kinase anchor protein 12		Anchoring protein that mediates the subcellular compartmentation of protein kinase A (PKA) and protein kinase C (PKC) (By similarity).	Cytoplasm, cytoskeleton (By similarity).	Alternative splicing; Complete proteome; Cytoplasm; Cytoskeleton;Lipoprotein; Myristate; Phosphoprotein; Reference proteome; Repeat.	RII_binding_1; WSK	GO:0005737;GO:0005856;GO:0005886;GO:0030159;GO:0030819;GO:0010739;GO:0006605;GO:0090036;GO:0007165	0.712	0.607	FALSE	0.717	0.646	FALSE
E9Q394-2	Akap13					Complete proteome; Metal-binding; Reference proteome; Zinc.	PH; RhoGEF	GO:0048471;GO:0046872;GO:0005089;GO:0035556;GO:0051168;GO:0010611;GO:1900169;GO:0045859;GO:0032319	0.131	0.888	FALSE	-0.38	0.714	FALSE
Q059U9	Akap8	A-kinase anchor protein 8		Anchoring protein that mediates the subcellular compartmentation of cAMP-dependent protein kinase (PKA type II) (By similarity).	Nucleus matrix. Note=Associated with the nuclear matrix. Redistributed and detached from condensed chromatin during mitosis (By similarity).	Complete proteome; DNA-binding; Metal-binding; Nucleus;Phosphoprotein; Reference proteome; Repeat; Zinc; Zinc-finger.	AKAP95	GO:0000793;GO:0001939;GO:0005794;GO:0005739;GO:0016363;GO:0003690;GO:0008270;GO:0007076	0.278	0.706	FALSE	0.404	0.604	FALSE
Q540D7	Akr1a1	Alcohol dehydrogenase [NADP(+)]				Complete proteome; Reference proteome.	Aldo_ket_red	GO:0016324;GO:0005829;GO:0004032;GO:0047939;GO:0046185;GO:0042840;GO:0019853	0.00224	0.996	FALSE	0.558	0.226	FALSE
Q8CI22	Akr1b10;Akr1b8	Aldose reductase-related protein 2			Cytoplasm (By similarity).	3D-structure; Complete proteome; Cytoplasm; NADP; Oxidoreductase;Reference proteome.	Aldo_ket_red	GO:0005737;GO:0004032	0.0508	0.967	FALSE	-0.645	0.583	FALSE
Q3UDY1	Akr1b3;Akr1b1	Aldose reductase				Complete proteome; Reference proteome.	Aldo_ket_red	GO:0004032	-0.418	0.242	FALSE	-0.115	0.802	FALSE
Q9JLI0	Akr1c12;Akr1c18	Aldo-keto reductase family 1 member C18				Complete proteome; Reference proteome.	Aldo_ket_red	GO:0004033;GO:0006805	-1.31	0.237	FALSE	-0.24	0.878	FALSE
Q571M4	Akr1c13;Akr1c19	Aldo-keto reductase family 1 member C13		Catalyzes the dehydrogenation of 17-beta- hydroxysteroids. May also exhibit significant activity with a variety of cyclic and alicyclic alcohols. Uses both NAD and NADP, but the activity is much greater with NAD than with NADP (By similarity).		3D-structure; Complete proteome; Direct protein sequencing; NAD; NADP;Oxidoreductase; Reference proteome.	Aldo_ket_red	GO:0004033;GO:0006805	-0.431	0.298	FALSE	0.283	0.55	FALSE
Q9DCT1	Akr1e2;Akr1e1	1,5-anhydro-D-fructose reductase		Catalyzes the NADPH-dependent reduction of 1,5-anhydro- D-fructose (AF) to 1,5-anhydro-D-glucitol. Can also catalyze the reduction of various aldehydes and quinones.	Cytoplasm.	Complete proteome; Cytoplasm; NADP; Oxidoreductase;Reference proteome.	Aldo_ket_red	GO:0005737;GO:0050571	-0.474	0.366	FALSE	-0.332	0.59	FALSE
Q8CG76	Akr7a2	Aflatoxin B1 aldehyde reductase member 2		Catalyzes the NADPH-dependent reduction of succinic semialdehyde to gamma-hydroxybutyrate. May have an important role in producing the neuromodulator gamma-hydroxybutyrate (GHB). Has broad substrate specificity. Can reduce the dialdehyde protein- binding form of aflatoxin B1 (AFB1) to the non-binding AFB1 dialcohol. May be involved in protection of liver against the toxic and carcinogenic effects…	Golgi apparatus (By similarity). Cytoplasm (By similarity).	3D-structure; Acetylation; Complete proteome; Cytoplasm;Golgi apparatus; NADP; Oxidoreductase; Reference proteome.	Aldo_ket_red	GO:0005794;GO:0005739;GO:0004032	-0.851	0.546	FALSE	-0.269	0.889	FALSE
Q3TY95	Akt2	RAC-beta serine/threonine-protein kinase				Complete proteome; Reference proteome.	PH; Pkinase	GO:0005524;GO:0004674;GO:0032859;GO:0008286;GO:0032287;GO:2001275;GO:0072659	-0.485	0.746	FALSE	-1.48	0.304	FALSE
Q9DD05	Alad	Delta-aminolevulinic acid dehydratase		Catalyzes an early step in the biosynthesis of tetrapyrroles. Binds two molecules of 5-aminolevulinate per subunit, each at a distinct site, and catalyzes their condensation to form porphobilinogen (By similarity).		3D-structure; Allosteric enzyme; Complete proteome; Heme biosynthesis;Lyase; Metal-binding; Phosphoprotein; Porphyrin biosynthesis;Reference proteome; Zinc.	ALAD	GO:0032791;GO:0004655;GO:0008270;GO:0071353;GO:0006783;GO:0051260;GO:0006782	0.422	0.32	FALSE	0.553	0.211	FALSE
E9Q4G8	Alcam	CD166 antigen				Complete proteome; Disulfide bond; Membrane; Reference proteome.	C2-set_2	GO:0030424;GO:0009897;GO:0043025;GO:0008045	1.28	0.0403	TRUE	0.217	0.766	FALSE
D3Z0B9	Aldh16a1	Aldehyde dehydrogenase family 16 member A1				Complete proteome; Reference proteome.	Aldedh	GO:0016620	-0.441	0.427	FALSE	-0.202	0.771	FALSE
Q3TWN8	Aldh18a1	Delta-1-pyrroline-5-carboxylate synthase;Glutamate 5-kinase;Gamma-glutamyl phosphate reductase		Bifunctional enzyme that converts glutamate to glutamate 5-semialdehyde, an intermediate in the biosynthesis of proline, ornithine and arginine (By similarity).	Mitochondrion inner membrane.	Alternative splicing; Amino-acid biosynthesis; ATP-binding;Complete proteome; Kinase; Membrane; Mitochondrion;Mitochondrion inner membrane; Multifunctional enzyme; NADP;Nucleotide-binding; Oxidoreductase; Proline biosynthesis;Reference proteome; Transferase.	AA_kinase; Aldedh	GO:0005743;GO:0005739;GO:0005524;GO:0004349;GO:0004350;GO:0019240;GO:0006536;GO:0055129;GO:0006592;GO:0006561	1.32	0.259	FALSE	0.323	0.835	FALSE
P47739	Aldh3a1;aldh3	Aldehyde dehydrogenase, dimeric NADP-preferring;Aldehyde dehydrogenase		ALDHs play a major role in the detoxification of alcohol-derived acetaldehyde. They are involved in the metabolism of corticosteroids, biogenic amines, neurotransmitters, and lipid peroxidation. This protein preferentially oxidizes aromatic aldehyde substrates. It may play a role in the oxidation of toxic aldehydes and in preventing corneal damage caused by ultraviolet light.	Cytoplasm.	Acetylation; Complete proteome; Cytoplasm; NAD; NADP; Oxidoreductase;Polymorphism; Reference proteome.	Aldedh	GO:0005829;GO:0005783;GO:0004028;GO:0008106;GO:0004029;GO:0004030;GO:0007568;GO:0006081;GO:0008284;GO:0051591;GO:0042493;GO:0051384;GO:0001666;GO:0007584	-0.598	0.525	FALSE	0.183	0.889	FALSE
Q9DBF1-2	Aldh7a1	Alpha-aminoadipic semialdehyde dehydrogenase				Complete proteome; Reference proteome.	Aldedh	GO:0005739;GO:0016491	0.00437	0.991	FALSE	0.308	0.41	FALSE
Q3THE7	Aldh9a1	4-trimethylaminobutyraldehyde dehydrogenase	Yes			Complete proteome; Oxidoreductase; Reference proteome.	Aldedh	GO:0005829;GO:0005739;GO:0005886;GO:0047105;GO:0043176;GO:0019145;GO:0051287;GO:0016620;GO:0009437;GO:0006081;GO:0001822;GO:0001889;GO:0042136	0.0968	0.872	FALSE	0.0111	0.993	FALSE
A6ZI44	Aldoa	Fructose-bisphosphate aldolase	Yes			Complete proteome; Glycolysis; Lyase; Reference proteome.	Glycolytic	GO:0005739;GO:0004332;GO:0006096;GO:0043627;GO:0009408;GO:0001666;GO:0032496;GO:0035094	-0.196	0.686	FALSE	0.217	0.687	FALSE
Q5FWB7	Aldoa	Fructose-bisphosphate aldolase;Fructose-bisphosphate aldolase A	Yes			Complete proteome; Glycolysis; Lyase; Reference proteome.	Glycolytic	GO:0005739;GO:0004332;GO:0006096;GO:0043627;GO:0009408;GO:0001666;GO:0032496;GO:0035094	-0.677	0.694	FALSE	0.207	0.93	FALSE
P05063	Aldoc	Fructose-bisphosphate aldolase C				Acetylation; Complete proteome; Direct protein sequencing; Glycolysis;Lyase; Reference proteome; Schiff base.	Glycolytic	GO:0030424;GO:0005739;GO:0004332;GO:0007568;GO:0006915;GO:0030388;GO:0006096;GO:0031100;GO:0051290;GO:0051289;GO:0001666;GO:0014070;GO:0010243	0.858	0.438	FALSE	0.0672	0.969	FALSE
Q8K1E6	Alkbh3	Alpha-ketoglutarate-dependent dioxygenase alkB homolog 3		Dioxygenase that repairs alkylated DNA containing 1- methyladenine (1meA) and 3-methylcytosine (3meC) by oxidative demethylation. Has a strong preference for single-stranded DNA. Able to process alkylated 3mC within double-stranded regions via its interaction with ASCC3, which promotes DNA unwinding to generate single-stranded substrate needed for ALKHB3. May also act on RNA. Requires molecular o…	Cytoplasm. Nucleus (By similarity).	Complete proteome; Cytoplasm; Dioxygenase; DNA damage; DNA repair;Iron; Metal-binding; Nucleus; Oxidoreductase; Reference proteome.	2OG-FeII_Oxy_2	GO:0005737;GO:0005634;GO:0051747;GO:0043734;GO:0008198;GO:0008283;GO:0006307;GO:0035552	-0.145	0.833	FALSE	-2.51	0.00104	TRUE
Q3TSG4	Alkbh5	RNA demethylase ALKBH5	Yes	Dioxygenase that demethylates RNA by oxidative demethylation: specifically demethylates N(6)-methyladenosine (m6A) RNA, the most prevalent internal modification of messenger RNA (mRNA) in higher eukaryotes. Requires molecular oxygen, alpha- ketoglutarate and iron (By similarity). Demethylation of m6A mRNA affects mRNA processing and export and is required for spermatogenesis.	Nucleus speckle (By similarity).	Acetylation; Coiled coil; Complete proteome; Differentiation;Dioxygenase; Iron; Metal-binding; Nucleus; Oxidoreductase;Phosphoprotein; Reference proteome; Spermatogenesis.	2OG-FeII_Oxy_2	GO:0016607;GO:0046872;GO:0035515;GO:0016706;GO:0030154;GO:0006406;GO:0006397;GO:0035553;GO:0001666;GO:0007283	-1.9	0.0614	FALSE	-0.537	0.644	FALSE
Q920R0	Als2	Alsin		May act as a GTPase regulator (By similarity). Controls survival and growth of spinal motoneurons (By similarity).		Acetylation; Alternative splicing; Complete proteome;Guanine-nucleotide releasing factor; Phosphoprotein;Reference proteome; Repeat.	MORN; RCC1; RhoGEF; VPS9	GO:0005829;GO:0043197;GO:0005769;GO:0030426;GO:0030027;GO:0014069;GO:0043234;GO:0001726;GO:0031982;GO:0042803;GO:0043539;GO:0017137;GO:0017112;GO:0030676;GO:0001662;GO:0016197;GO:0007626;GO:0007528;GO:0048812;GO:0032855;GO:0008104;GO:0001881;GO:0051036;GO:0006979;GO:0035249;GO:0016050	0.364	0.548	FALSE	0.564	0.376	FALSE
O08583-2	Alyref;Alyref2;Refbp2	THO complex subunit 4;Aly/REF export factor 2		Export adapter involved in spliced and unspliced mRNA nuclear export. Binds mRNA which is transferred to the NXF1-NXT1 heterodimer for export (TAP/NFX1 pathway); enhances NXF1-NXT1 RNA- binding activity.	Nucleus. Cytoplasm.	3D-structure; Alternative splicing; Chaperone; Complete proteome;Cytoplasm; Methylation; mRNA processing; mRNA splicing;mRNA transport; Nucleus; Reference proteome; RNA-binding; Spliceosome;Transport.	FoP_duplication	GO:0005737;GO:0005681;GO:0000166;GO:0003723;GO:0003697;GO:0006397;GO:0051028;GO:0008380	0.756	0.312	FALSE	-0.603	0.467	FALSE
A2AE27	Ampd2	AMP deaminase 2				Complete proteome; Reference proteome.	A_deaminase	GO:0003876;GO:0097009;GO:0006188	-0.503	0.279	FALSE	-0.171	0.768	FALSE
B7ZNX2	Anapc1	Anaphase-promoting complex subunit 1				Complete proteome; Reference proteome.	Apc1	GO:0005680;GO:0005634	-0.568	0.359	FALSE	-0.901	0.17	FALSE
Q3TM92	Anapc4	Anaphase-promoting complex subunit 4		Component of the anaphase promoting complex/cyclosome (APC/C), a cell cycle-regulated E3 ubiquitin ligase that controls progression through mitosis and the G1 phase of the cell cycle. The APC/C complex acts by mediating ubiquitination and subsequent degradation of target proteins: it mainly mediates the formation of 'Lys-11'-linked polyubiquitin chains and, to a lower extent, the formation of 'Ly…		Cell cycle; Cell division; Complete proteome; Mitosis; Phosphoprotein;Reference proteome; Ubl conjugation pathway.	Apc4; Apc4_WD40	GO:0005680;GO:0031145;GO:0007067;GO:0070979;GO:0030071	-0.256	0.834	FALSE	-0.128	0.938	FALSE
Q810B6	Ankfy1	Rabankyrin-5			Cytoplasm. Endosome membrane; Peripheral membrane protein. Note=Also associated with endosomal membranes.	Acetylation; Alternative splicing; ANK repeat; Complete proteome;Cytoplasm; Endosome; Membrane; Metal-binding; Reference proteome;Repeat; Zinc; Zinc-finger.	Ank; Ank_2; BTB; FYVE	GO:0010008;GO:0046872;GO:0006897	-1.11	0.399	FALSE	0.211	0.913	FALSE
Q6P1H6-2	Ankle2	Ankyrin repeat and LEM domain-containing protein 2		Involved in mitotic nuclear envelope reassembly by promoting dephosphorylation of BAF/BANF1 during mitotic exit. Coordinates the control of BAF/BANF1 dephosphorylation by inhibiting VRK1 kinase and promoting dephosphorylation of BAF/BANF1 by protein phosphatase 2A (PP2A), thereby facilitating nuclear envelope assembly. It is unclear whether it acts as a real PP2A regulatory subunit or whether it …	Endoplasmic reticulum membrane; Single-pass type III membrane protein (By similarity).	Alternative splicing; ANK repeat; Cell cycle; Cell division;Complete proteome; Endoplasmic reticulum; Membrane; Mitosis;Phosphoprotein; Reference proteome; Signal-anchor; Transmembrane;Transmembrane helix.	Ank_3; LEM	GO:0030176;GO:0051721;GO:0007067;GO:0007084;GO:0042326;GO:0035307	-0.692	0.567	FALSE	-0.0807	0.963	FALSE
Q3U0V3	Ankrd13a	Ankyrin repeat domain-containing protein 13A				Complete proteome; Reference proteome.	GPCR_chapero_1		-1.87	0.0392	TRUE	-1.76	0.049	TRUE
E9QKG6	Ankrd17	Ankyrin repeat domain-containing protein 17				ANK repeat; Complete proteome; Reference proteome; Repeat.	Ank; Ank_2; KH_1	GO:0005634;GO:0003723;GO:0001955;GO:0007492;GO:0051151	-0.176	0.885	FALSE	0.484	0.723	FALSE
B2RXR6	Ankrd44	Serine/threonine-protein phosphatase 6 regulatory ankyrin repeat subunit B		Putative regulatory subunit of protein phosphatase 6 (PP6) that may be involved in the recognition of phosphoprotein substrates (By similarity).		ANK repeat; Complete proteome; Reference proteome; Repeat.	Ank; Ank_2; Ank_3		-0.375	0.548	FALSE	-0.367	0.604	FALSE
Q8BTI7	Ankrd52	Serine/threonine-protein phosphatase 6 regulatory ankyrin repeat subunit C		Putative regulatory subunit of protein phosphatase 6 (PP6) that may be involved in the recognition of phosphoprotein substrates (By similarity).		ANK repeat; Complete proteome; Phosphoprotein; Reference proteome;Repeat.	Ank; Ank_2		-2	0.0662	FALSE	0.444	0.729	FALSE
Q3TE53	Anks1;Anks1a	Ankyrin repeat and SAM domain-containing protein 1A		Regulator of different signaling pathways. Regulates EPHA8 receptor tyrosine kinase signaling to control cell migration and neurite retraction.	Cytoplasm (By similarity). Cell projection. Note=Cytoplasmic before and after growth factor treatment (By similarity).	Acetylation; Alternative splicing; ANK repeat; Cell projection;Complete proteome; Cytoplasm; Phosphoprotein; Reference proteome;Repeat.	Ank_2; PID; SAM_1; SAM_2	GO:0005737;GO:0043005;GO:0005634;GO:0048013;GO:0016322;GO:0006929	-0.454	0.706	FALSE	0.81	0.515	FALSE
Q8K298	Anln	Actin-binding protein anillin		Required for cytokinesis. Essential for the structural integrity of the cleavage furrow and for completion of cleavage furrow ingression (By similarity).	Nucleus (By similarity). Cytoplasm, cytoskeleton (By similarity). Cytoplasm, cell cortex (By similarity). Note=Mainly found in the nucleus during interphase. Colocalizes with cortical F-actin upon nuclear envelope breakdown in mitosis and subsequently concentrates in the area of the prospective contractile ring in anaphase. This pattern persists until telophase, when the protein becomes concentra…	Acetylation; Actin-binding; Cell cycle; Cell division; Coiled coil;Complete proteome; Cytoplasm; Cytoskeleton; Mitosis; Nucleus;Phosphoprotein; Reference proteome; Ubl conjugation.	Anillin; PH	GO:0005826;GO:0005634;GO:0007067	2.71	0.338	FALSE	-1.88	0.561	FALSE
Q6P9J9	Ano6	Anoctamin-6		Small-conductance calcium-activated nonselective cation (SCAN) channel which acts as a regulator of phospholipid scrambling in platelets and osteoblasts. Phospholipid scrambling results in surface exposure of phosphatidylserine which in platelets is essential to trigger the clotting system whereas in osteoblasts is essential for the deposition of hydroxyapatite during bone mineralization. Can gen…	Cell membrane; Multi-pass membrane protein (By similarity). Note=Shows an intracellular localization (By similarity).	Alternative splicing; Cell membrane; Chloride; Chloride channel;Complete proteome; Glycoprotein; Ion channel; Ion transport; Membrane;Reference proteome; Transmembrane; Transmembrane helix; Transport;Voltage-gated channel.	Anoctamin	GO:0034707;GO:0005622;GO:0005886;GO:0005227;GO:0005229;GO:0017128;GO:0005244;GO:0002543;GO:0007596;GO:0035630;GO:0002407;GO:0097045	0.191	0.833	FALSE	0.315	0.745	FALSE
D3YYE1	Anp32a;Anp32c	Acidic leucine-rich nuclear phosphoprotein 32 family member A;Putative acidic leucine-rich nuclear phosphoprotein 32 family member C				Complete proteome; Leucine-rich repeat; Reference proteome; Repeat.		GO:0016363	-0.197	0.776	FALSE	0.168	0.835	FALSE
Q3UW32	Anp32b	Acidic leucine-rich nuclear phosphoprotein 32 family member B		Multifunctional protein working as a cell cycle progression factor as well as a cell survival factor. Required for the progression from the G1 to the S phase. Anti-apoptotic protein which functions as a caspase-3 inhibitor. Has no phosphatase 2A (PP2A) inhibitor activity. Exhibits histone chaperone properties, stimulating core histones to assemble into a nucleosome (By similarity).	Nucleus. Note=Accumulates in the nuclei at the S phase (By similarity).	Alternative splicing; Chaperone; Complete proteome;Leucine-rich repeat; Nucleus; Phosphoprotein; Reference proteome;Repeat.		GO:0005634;GO:0000082;GO:0048839;GO:0060021;GO:0001944;GO:0021591	-0.00716	0.987	FALSE	0.288	0.55	FALSE
Q3TX26	Anp32e	Acidic leucine-rich nuclear phosphoprotein 32 family member E				Complete proteome; Leucine-rich repeat; Reference proteome; Repeat.	LRR_4	GO:0016023;GO:0005634;GO:0019212	0.53	0.544	FALSE	0.781	0.4	FALSE
Q4FJV4	Anxa1	Annexin;Annexin A1	Yes	Calcium/phospholipid-binding protein which promotes membrane fusion and is involved in exocytosis. This protein regulates phospholipase A2 activity. It seems to bind from two to four calcium ions with high affinity.	Nucleus (By similarity). Cytoplasm (By similarity). Cell projection, cilium (By similarity). Basolateral cell membrane (By similarity). Note=Found in the cilium, nucleus and basolateral cell membrane of ciliated cells in the tracheal endothelium (By similarity). Found in the cytoplasm of type II pneumocytes and alveolar macrophages (By similarity).	Acetylation; Annexin; Calcium; Calcium/phospholipid-binding;Cell membrane; Cell projection; Cilium; Complete proteome; Cytoplasm;Isopeptide bond; Membrane; Nucleus; Phospholipase A2 inhibitor;Phosphoprotein; Reference proteome; Repeat.	Annexin	GO:0016323;GO:0005929;GO:0001533;GO:0005615;GO:0070062;GO:0031966;GO:0005634;GO:0043234;GO:0042383;GO:0005509;GO:0005544;GO:0019834;GO:0005198;GO:0046632;GO:0050482;GO:0007166;GO:0071385;GO:0070301;GO:0031018;GO:0060206;GO:0042063;GO:0070365;GO:0030073;GO:0030216;GO:0002674;GO:0043066;GO:0043086;GO:0050709;GO:0097350;GO:0001780;GO:0018149;GO:1900087;GO:0033031;GO:0031394;GO:0031340;GO:0042127;GO:…	0.0221	0.965	FALSE	0.227	0.648	FALSE
P97384	Anxa11	Annexin A11;Annexin		Required for midbody formation and completion of the terminal phase of cytokinesis (By similarity). Binds specifically to calcyclin in a calcium-dependent manner.	Cytoplasm (By similarity). Melanosome (By similarity). Nucleus envelope (By similarity). Nucleus, nucleoplasm (By similarity). Cytoplasm, cytoskeleton, spindle (By similarity). Note=Found throughout the nucleoplasm at interphase and during mitosis concentrates around the mitotic apparatus (By similarity). Elevation of intracellular calcium causes relocalization from the nucleoplasm to the nuclear…	Acetylation; Annexin; Calcium; Calcium/phospholipid-binding;Cell cycle; Cell division; Complete proteome; Cytoplasm; Cytoskeleton;Nucleus; Reference proteome; Repeat.	Annexin	GO:0042582;GO:0005737;GO:0042470;GO:0030496;GO:0005635;GO:0005654;GO:0045335;GO:0042581;GO:0005819;GO:0005509;GO:0005544;GO:0008429;GO:0044548;GO:0007109;GO:0006909;GO:0051592	-0.15	0.784	FALSE	0.0941	0.889	FALSE
Q542G9	Anxa2	Annexin;Annexin A2	Yes			Annexin; Calcium; Calcium/phospholipid-binding; Complete proteome;Reference proteome; Repeat.	Annexin	GO:0005769;GO:0019897;GO:0042383;GO:0005509;GO:0005544;GO:0004859;GO:0001525;GO:0071229;GO:0030199;GO:0042730;GO:0043086;GO:0051099	0.34	0.388	FALSE	0.168	0.729	FALSE
D3Z0S1	Anxa4	Annexin;Annexin A4				Annexin; Calcium; Calcium/phospholipid-binding; Complete proteome;Reference proteome; Repeat.	Annexin	GO:0016324;GO:0005509;GO:0005544;GO:0001822	1.36	0.144	FALSE	0.629	0.551	FALSE
P48036	Anxa5	Annexin A5		This protein is an anticoagulant protein that acts as an indirect inhibitor of the thromboplastin-specific complex, which is involved in the blood coagulation cascade.		Acetylation; Annexin; Blood coagulation; Calcium;Calcium/phospholipid-binding; Complete proteome;Direct protein sequencing; Hemostasis; Reference proteome; Repeat.	Annexin	GO:0072563;GO:0009897;GO:0070062;GO:0005622;GO:0005509;GO:0005544;GO:0007596;GO:0050819;GO:0010033	0.679	0.101	FALSE	0.691	0.101	FALSE
P14824	Anxa6	Annexin A6;Annexin		May associate with CD21. May regulate the release of Ca(2+) from intracellular stores.	Cytoplasm (By similarity). Melanosome (By similarity).	Acetylation; Annexin; Calcium; Calcium/phospholipid-binding;Complete proteome; Cytoplasm; Direct protein sequencing;Phosphoprotein; Reference proteome; Repeat.	Annexin	GO:0070062;GO:0042470;GO:0048471;GO:0005509;GO:0005544;GO:0006816;GO:0006937	0.544	0.376	FALSE	-0.154	0.855	FALSE
Q922A2	Anxa7	Annexin;Annexin A7		Calcium/phospholipid-binding protein which promotes membrane fusion and is involved in exocytosis.		Acetylation; Annexin; Calcium; Calcium/phospholipid-binding;Complete proteome; Reference proteome; Repeat.	Annexin	GO:0042584;GO:0005829;GO:0005789;GO:0005635;GO:0005886;GO:0031982;GO:0005509;GO:0005544;GO:0008283;GO:0006874;GO:0009992;GO:0007599;GO:0061025;GO:0008360;GO:0051592;GO:0014070;GO:0009651;GO:0035176	0.136	0.845	FALSE	-0.194	0.809	FALSE
Q5SVG5	Ap1b1	AP-1 complex subunit beta-1;AP complex subunit beta				Complete proteome; Membrane; Protein transport; Reference proteome;Transport.	Adaptin_N; Alpha_adaptinC2; B2-adapt-app_C	GO:0030131;GO:0005802;GO:0008565;GO:0006886;GO:0016192	-1.06	0.2	FALSE	-0.978	0.264	FALSE
Q8CBB7	Ap1g1	AP-1 complex subunit gamma-1				Complete proteome; Membrane; Protein transport; Reference proteome;Transport.	Adaptin_N; Alpha_adaptinC2	GO:0030131;GO:0030136;GO:0005794;GO:0048471;GO:0055037;GO:0005802;GO:0008565;GO:0006886;GO:0016192	-0.992	0.676	FALSE	-0.881	0.745	FALSE
Q3UG16	Ap1m1;Ap1m2	AP-1 complex subunit mu-1;AP-1 complex subunit mu-2				Complete proteome; Membrane; Protein transport; Reference proteome;Transport.	Adap_comp_sub; Clat_adaptor_s	GO:0030131;GO:0005802;GO:0035646;GO:0006886;GO:0032438;GO:0016192	-1.27	0.111	FALSE	-1.13	0.169	FALSE
P61967	Ap1s1	AP-1 complex subunit sigma-1A		Subunit of clathrin-associated adaptor protein complex 1 that plays a role in protein sorting in the late-Golgi/trans-Golgi network (TGN) and/or endosomes. The AP complexes mediate both the recruitment of clathrin to membranes and the recognition of sorting signals within the cytosolic tails of transmembrane cargo molecules.	Golgi apparatus. Cytoplasmic vesicle membrane; Peripheral membrane protein; Cytoplasmic side. Membrane, clathrin-coated pit. Note=Component of the coat surrounding the cytoplasmic face of coated vesicles located at the Golgi complex.	3D-structure; Coated pit; Complete proteome; Cytoplasmic vesicle;Golgi apparatus; Membrane; Phosphoprotein; Protein transport;Reference proteome; Transport.	Clat_adaptor_s	GO:0030121;GO:0005905;GO:0005802;GO:0008565;GO:0006886;GO:0009615;GO:0016192	0.197	0.836	FALSE	-1.59	0.0705	FALSE
Q3TIV9	Ap1s2	AP-1 complex subunit sigma-2				Complete proteome; Membrane; Protein transport; Reference proteome;Transport.	Clat_adaptor_s	GO:0030117;GO:0008565;GO:0006886;GO:0016192	-0.291	0.794	FALSE	-0.101	0.947	FALSE
P17426-2	Ap2a1	AP-2 complex subunit alpha-1		Component of the adaptor protein complex 2 (AP-2). Adaptor protein complexes function in protein transport via transport vesicles in different membrane traffic pathways. Adaptor protein complexes are vesicle coat components and appear to be involved in cargo selection and vesicle formation. AP-2 is involved in clathrin-dependent endocytosis in which cargo proteins are incorporated into vesicles s…	Cell membrane (By similarity). Membrane, coated pit; Peripheral membrane protein; Cytoplasmic side (By similarity). Note=AP-2 appears to be excluded from internalizing CCVs and to disengage from sites of endocytosis seconds before internalization of the nascent CCV (By similarity).	Alternative splicing; Cell membrane; Coated pit; Complete proteome;Endocytosis; Membrane; Phosphoprotein; Protein transport;Reference proteome; Transport.	Adaptin_N; Alpha_adaptin_C; Alpha_adaptinC2	GO:0016324;GO:0016323;GO:0030131;GO:0005905;GO:0030117;GO:0030141;GO:0008565;GO:0006897;GO:0006886;GO:0016192	-1.57	0.169	FALSE	-1.34	0.264	FALSE
Q6PEE6	Ap2a2	AP-2 complex subunit alpha-2		Component of the adaptor protein complex 2 (AP-2). Adaptor protein complexes function in protein transport via transport vesicles in different membrane traffic pathways. Adaptor protein complexes are vesicle coat components and appear to be involved in cargo selection and vesicle formation. AP-2 is involved in clathrin-dependent endocytosis in which cargo proteins are incorporated into vesicles s…	Cell membrane. Membrane, coated pit; Peripheral membrane protein; Cytoplasmic side. Note=AP-2 appears to be excluded from internalizing CCVs and to disengage from sites of endocytosis seconds before internalization of the nascent CCV.	3D-structure; Cell membrane; Coated pit; Complete proteome;Endocytosis; Lipid-binding; Membrane; Protein transport;Reference proteome; Transport.	Adaptin_N; Alpha_adaptin_C; Alpha_adaptinC2	GO:0030131;GO:0005905;GO:0030117;GO:0005886;GO:0030141;GO:0008289;GO:0008565;GO:0006897;GO:0006886;GO:0016192	0.0418	0.929	FALSE	-0.0648	0.914	FALSE
Q5SWR1	Ap2b1	AP complex subunit beta;AP-2 complex subunit beta				Complete proteome; Membrane; Protein transport; Reference proteome;Transport.	Adaptin_N; Alpha_adaptinC2; B2-adapt-app_C	GO:0030131;GO:0008565;GO:0006886;GO:0016192	-0.525	0.359	FALSE	-0.583	0.348	FALSE
Q3TWV4	Ap2m1	AP-2 complex subunit mu				Complete proteome; Membrane; Protein transport; Reference proteome;Transport.	Adap_comp_sub; Clat_adaptor_s	GO:0030131;GO:0005739;GO:0030141;GO:0006886;GO:0016192	-1.07	0.246	FALSE	-0.11	0.938	FALSE
Q3UJ76	Ap2s1	AP-2 complex subunit sigma		Component of the adaptor protein complex 2 (AP-2). Adaptor protein complexes function in protein transport via Transport vesicles in different membrane traffic pathways. Adaptor protein complexes are vesicle coat components and appear to be involved in cargo selection and vesicle formation. AP-2 is involved in clathrin-dependent endocytosis in which cargo proteins are incorporated into vesicles s…	Cell membrane. Membrane, coated pit; Peripheral membrane protein; Cytoplasmic side. Note=AP-2 appears to be excluded from internalizing CCVs and to disengage from sites of endocytosis seconds before internalization of the nascent CCV (By similarity).	3D-structure; Cell membrane; Coated pit; Complete proteome;Endocytosis; Membrane; Phosphoprotein; Protein transport;Reference proteome; Transport.	Clat_adaptor_s	GO:0030122;GO:0008565;GO:0006897;GO:0006886	-1.07	0.259	FALSE	-0.913	0.376	FALSE
Q9Z1T1	Ap3b1;Ap3b2	AP-3 complex subunit beta-1;AP-3 complex subunit beta-2		Subunit of non-clathrin- and clathrin-associated adaptor protein complex 3 (AP-3) that plays a role in protein sorting in the late-Golgi/trans-Golgi network (TGN) and/or endosomes. The AP complexes mediate both the recruitment of clathrin to membranes and the recognition of sorting signals within the cytosolic tails of transmembrane cargo molecules. AP-3 appears to be involved in the sorting of a…	Golgi apparatus. Cytoplasmic vesicle, clathrin-coated vesicle membrane; Peripheral membrane protein; Cytoplasmic side (By similarity). Golgi apparatus (By similarity). Note=Component of the coat surrounding the cytoplasmic face of coated vesicles located at the Golgi complex (By similarity).	Complete proteome; Cytoplasmic vesicle; Golgi apparatus; Membrane;Phosphoprotein; Protein transport; Reference proteome; Transport.	Adaptin_N	GO:0030123;GO:0030665;GO:0005794;GO:0005802;GO:0008089;GO:0048490;GO:0048007;GO:0007596;GO:0032438;GO:0051138;GO:0006622;GO:0006829	-1.56	0.162	FALSE	-0.543	0.686	FALSE
O54774	Ap3d1	AP-3 complex subunit delta-1		Part of the AP-3 complex, an adaptor-related complex which is not clathrin-associated. The complex is associated with the Golgi region as well as more peripheral structures. It facilitates the budding of vesicles from the Golgi membrane and may be directly involved in trafficking to lysosomes (By similarity). In concert with the BLOC-1 complex, AP-3 is required to target cargos into vesicles asse…	Cytoplasm (By similarity). Golgi apparatus membrane; Peripheral membrane protein; Cytoplasmic side (By similarity).	Acetylation; Coiled coil; Complete proteome; Cytoplasm;Golgi apparatus; Membrane; Phosphoprotein; Protein transport;Reference proteome; Repeat; Transport.	Adaptin_N; BLVR	GO:0010008;GO:0000139;GO:0030117;GO:0043195;GO:0005802;GO:0008565;GO:0008089;GO:0048490;GO:0048007;GO:0006886;GO:0051138;GO:0033365;GO:0061088;GO:0048499;GO:0006829	-1.23	0.199	FALSE	-2.23	0.0315	TRUE
H7BWY2	Ap3m1	AP-3 complex subunit mu-1				Complete proteome; Membrane; Protein transport; Reference proteome;Transport.	Adap_comp_sub	GO:0030131;GO:0006886;GO:0016192	-1.04	0.0415	TRUE	-0.0206	0.982	FALSE
Q5DU30	Apaf1	Apoptotic protease-activating factor 1				ATP-binding; Complete proteome; Nucleotide-binding;Reference proteome.	CARD; NB-ARC	GO:0005829;GO:0005634;GO:0043531;GO:0005524;GO:0008656;GO:0006309;GO:0030900;GO:0001843;GO:0051402;GO:2001235	-0.42	0.811	FALSE	-1.28	0.445	FALSE
B1AYC9	Apbb1ip	Amyloid beta A4 precursor protein-binding family B member 1-interacting protein		Appears to function in the signal transduction from Ras activation to actin cytoskeletal remodeling. Suppresses insulin- induced promoter activities through AP1 and SRE. Mediates Rap1- induced adhesion (By similarity).	Cell membrane; Peripheral membrane protein. Cell projection, lamellipodium. Cell junction, focal adhesion. Cytoplasm, cytoskeleton. Note=Colocalizes with ENA/VASP proteins at lamellipodia tips and focal adhesions, and F-actin at the leading edge. At the membrane surface, associates, via the PH domain, preferentially with the inositol phosphates, PtdIns(5)P and PtdIns(3)P. This binding appears to …	3D-structure; Cell junction; Cell membrane; Cell projection;Complete proteome; Cytoplasm; Cytoskeleton; Membrane; Phosphoprotein;Reference proteome.	PH; RA	GO:0005737;GO:0005856;GO:0005925;GO:0030027;GO:0005886;GO:0007165	-0.0313	0.982	FALSE	-0.603	0.695	FALSE
A0A0R4J107	Apeh	Acylamino-acid-releasing enzyme		This enzyme catalyzes the hydrolysis of the N-terminal peptide bond of an N-acetylated peptide to generate an N- acetylated amino acid and a peptide with a free N-terminus. It preferentially cleaves off Ac-Ala, Ac-Met and Ac-Ser (By similarity).	Cytoplasm (By similarity).	Acetylation; Alternative splicing; Complete proteome; Cytoplasm;Hydrolase; Phosphoprotein; Reference proteome.	Peptidase_S9	GO:0005737;GO:0031965;GO:0004252;GO:0006508	0.324	0.357	FALSE	0.324	0.4	FALSE
F6QA74	Apex1	DNA-(apurinic or apyrimidinic site) lyase;DNA-(apurinic or apyrimidinic site) lyase, mitochondrial				Complete proteome; Reference proteome.	Exo_endo_phos	GO:0005737;GO:0005634;GO:0003677;GO:0004519;GO:0045454;GO:0006281;GO:0090305	0.123	0.798	FALSE	-0.537	0.217	FALSE
O35841	Api5	Apoptosis inhibitor 5		Antiapoptotic factor that may have a role in protein assembly. Negatively regulates ACIN1. By binding to ACIN1, it suppresses ACIN1 cleavage from CASP3 and ACIN1-mediated DNA fragmentation. Also known to efficiently suppress E2F1-induced apoptosis (By similarity).	Nucleus (By similarity). Cytoplasm (By similarity). Note=Mainly nuclear.	Acetylation; Apoptosis; Complete proteome; Cytoplasm; Nucleus;Phosphoprotein; Reference proteome; Repeat.	API5	GO:0005737;GO:0005681;GO:0017134;GO:0006915;GO:2000270	-0.93	0.0357	FALSE	-0.777	0.07	FALSE
Q9WVQ5	Apip	Methylthioribulose-1-phosphate dehydratase		Catalyzes the dehydration of methylthioribulose-1- phosphate (MTRu-1-P) into 2,3-diketo-5-methylthiopentyl-1- phosphate (DK-MTP-1-P). Functions in the methionine salvage pathway, which plays a key role in cancer, apoptosis, microbial proliferation and inflammation. May inhibit the CASP1-related inflammatory response (pyroptosis), the CASP9-dependent apoptotic pathway and the cytochrome c-dependen…	Cytoplasm (By similarity).	Amino-acid biosynthesis; Apoptosis; Complete proteome; Cytoplasm;Lyase; Metal-binding; Methionine biosynthesis; Reference proteome;Zinc.	Aldolase_II	GO:0005737;GO:0046570;GO:0008270;GO:0006915;GO:0019284;GO:0019509;GO:0043066;GO:0070372	0.00484	0.992	FALSE	0.418	0.359	FALSE
Q9D842-3	Aplf	Aprataxin and PNK-like factor		Nuclease involved in single-strand and double-strand DNA break repair. Recruited to sites of DNA damage through interaction with poly(ADP-ribose), a polymeric post-translational modification synthesized transiently at sites of chromosomal damage to accelerate DNA strand break repair reactions. Displays apurinic- apyrimidinic (AP) endonuclease and 3'-5' exonuclease activities in vitro. Also able t…	Nucleus. Cytoplasm, cytosol. Note=Localizes to DNA damage sites. Accumulates at single-strand breaks and double-strand breaks via the PBZ-type zinc fingers (By similarity).	ADP-ribosylation; Alternative splicing; Coiled coil;Complete proteome; Cytoplasm; DNA damage; DNA repair; Lyase;Metal-binding; Nucleotide-binding; Nucleus; Phosphoprotein;Reference proteome; Repeat; Zinc; Zinc-finger.	zf-CCHH	GO:0005829;GO:0005634;GO:0008408;GO:0003906;GO:0004520;GO:0046872;GO:0000166;GO:0006302;GO:0045191;GO:0000012	-0.702	0.182	FALSE	0.318	0.603	FALSE
Q8K4Z3	Apoa1bp	NAD(P)H-hydrate epimerase		Catalyzes the epimerization of the S- and R-forms of NAD(P)HX, a damaged form of NAD(P)H that is a result of enzymatic or heat-dependent hydration. This is a prerequisite for the S- specific NAD(P)H-hydrate dehydratase to allow the repair of both epimers of NAD(P)HX.	Mitochondrion (By similarity). Secreted. Note=In sperm, secretion gradually increases during capacitation.	3D-structure; Complete proteome; Isomerase; Metal-binding;Mitochondrion; NAD; NADP; Nucleotide-binding; Phosphoprotein;Potassium; Reference proteome; Secreted; Transit peptide.	YjeF_N	GO:0044297;GO:0005929;GO:0005615;GO:0005739;GO:0016853;GO:0046872;GO:0000166;GO:0042803;GO:0008152;GO:0051289	0.704	0.144	FALSE	0.915	0.0676	FALSE
Q9WV35	Apobec2	Probable C->U-editing enzyme APOBEC-2		Probable C to U editing enzyme whose physiological substrate is not yet known. Does not display detectable apoB mRNA editing. Has a low intrinsic cytidine deaminase activity. May play a role in the epigenetic regulation of gene expression through the process of active DNA demethylation (By similarity).		3D-structure; Complete proteome; Hydrolase; Metal-binding;mRNA processing; Reference proteome; Zinc.	APOBEC_N	GO:0016814;GO:0008270;GO:0080111;GO:0016556;GO:0006397	-0.608	0.573	FALSE	-0.169	0.912	FALSE
H3BJQ3	Apobec3;Apobec	DNA dC->dU-editing enzyme APOBEC-3				Complete proteome; Reference proteome.	APOBEC_N	GO:0016814;GO:0008270;GO:0008152	0.448	0.585	FALSE	-0.823	0.334	FALSE
Q8K3H0	Appl1	DCC-interacting protein 13-alpha		Required for the regulation of cell proliferation in response to extracellular signals from an early endosomal compartment. Links Rab5 to nuclear signal transduction (By similarity).	Early endosome membrane; Peripheral membrane protein (By similarity). Nucleus (By similarity). Note=Early endosomal membrane-bound and nuclear. Translocated into the nucleus upon release from endosomal membranes following internalization of EGF (By similarity).	Cell cycle; Coiled coil; Complete proteome; Endosome; Membrane;Nucleus; Phosphoprotein; Reference proteome.	PID	GO:0005829;GO:0031901;GO:0010008;GO:0005634;GO:0016581;GO:0012506;GO:0007049;GO:0008283;GO:0090003;GO:0046324	-0.611	0.125	FALSE	-0.324	0.458	FALSE
P08030	Aprt	Adenine phosphoribosyltransferase		Catalyzes a salvage reaction resulting in the formation of AMP, that is energically less costly than de novo synthesis.	Cytoplasm.	Acetylation; Complete proteome; Cytoplasm; Glycosyltransferase;Phosphoprotein; Purine salvage; Reference proteome; Transferase.	Pribosyltran	GO:0005737;GO:0005634;GO:0002055;GO:0003999;GO:0016208;GO:0006168;GO:0044209;GO:0032869;GO:0007625;GO:0007595;GO:0006166	-0.611	0.602	FALSE	-1.08	0.375	FALSE
A2AQA7	Aqr	Intron-binding protein aquarius				Complete proteome; Reference proteome.		GO:0005681;GO:0097157;GO:0000398	-0.426	0.738	FALSE	-0.374	0.798	FALSE
Q5XJY5	Arcn1	Coatomer subunit delta	Yes	The coatomer is a cytosolic protein complex that binds to dilysine motifs and reversibly associates with Golgi non- clathrin-coated vesicles, which further mediate biosynthetic protein transport from the ER, via the Golgi up to the trans Golgi network. Coatomer complex is required for budding from Golgi membranes, and is essential for the retrograde Golgi-to-ER transport of dilysine-tagged protei…	Cytoplasm (By similarity). Golgi apparatus membrane; Peripheral membrane protein; Cytoplasmic side (By similarity). Cytoplasmic vesicle, COPI-coated vesicle membrane; Peripheral membrane protein; Cytoplasmic side (By similarity). Note=The coatomer is cytoplasmic or polymerized on the cytoplasmic side of the Golgi, as well as on the vesicles/buds originating from it (By similarity).	Acetylation; Complete proteome; Cytoplasm; Cytoplasmic vesicle;ER-Golgi transport; Golgi apparatus; Membrane; Phosphoprotein;Protein transport; Reference proteome; Transport.	Adap_comp_sub; Clat_adaptor_s	GO:0030131;GO:0030126;GO:0030137;GO:0005783;GO:0008344;GO:0021691;GO:0048193;GO:0006886;GO:0043473;GO:0006890	-1.06	0.167	FALSE	-0.866	0.288	FALSE
P84078	Arf1	ADP-ribosylation factor 1		GTP-binding protein that functions as an allosteric activator of the cholera toxin catalytic subunit, an ADP- ribosyltransferase. Involved in protein trafficking among different compartments. Modulates vesicle budding and uncoating within the Golgi complex. Deactivation induces the redistribution of the entire Golgi complex to the endoplasmic reticulum, suggesting a crucial role in protein traffi…	Golgi apparatus. Cytoplasm, perinuclear region (By similarity). Cell junction, synapse, synaptosome (By similarity). Cell junction, synapse, postsynaptic cell membrane, postsynaptic density (By similarity).	3D-structure; Acetylation; Cell junction; Cell membrane;Complete proteome; Cytoplasm; Direct protein sequencing;ER-Golgi transport; Golgi apparatus; GTP-binding; Lipoprotein;Membrane; Myristate; Nucleotide-binding; Postsynaptic cell membrane;Protein transport; Reference proteome; Synapse; Synaptosome;Transport.	Arf	GO:0030054;GO:0005829;GO:0005794;GO:0043005;GO:0048471;GO:0014069;GO:0045211;GO:0030017;GO:0005525;GO:0006878;GO:0097061;GO:0060292;GO:0015031;GO:0034315;GO:0002090;GO:0007264;GO:0016192	-1.02	0.464	FALSE	-1.87	0.196	FALSE
Q3U344	Arf3	ADP-ribosylation factor 3		GTP-binding protein that functions as an allosteric activator of the cholera toxin catalytic subunit, an ADP- ribosyltransferase. Involved in protein trafficking; may modulate vesicle budding and uncoating within the Golgi apparatus.	Golgi apparatus (By similarity). Cytoplasm, perinuclear region (By similarity).	Complete proteome; Cytoplasm; ER-Golgi transport; Golgi apparatus;GTP-binding; Lipoprotein; Myristate; Nucleotide-binding;Protein transport; Reference proteome; Transport.	Arf	GO:0005794;GO:0048471;GO:0005525;GO:0015031;GO:0007264;GO:0016192	-1.7	0.0227	TRUE	0.337	0.677	FALSE
P84084	Arf5	ADP-ribosylation factor 5		GTP-binding protein that functions as an allosteric activator of the cholera toxin catalytic subunit, an ADP- ribosyltransferase. Involved in protein trafficking; may modulate vesicle budding and uncoating within the Golgi apparatus.	Golgi apparatus. Cytoplasm, perinuclear region (By similarity).	Complete proteome; Cytoplasm; ER-Golgi transport; Golgi apparatus;GTP-binding; Lipoprotein; Myristate; Nucleotide-binding;Protein transport; Reference proteome; Transport.	Arf	GO:0005737;GO:0005794;GO:0048471;GO:0005886;GO:0005525;GO:0015031;GO:0007264;GO:0016192	-1.37	0.44	FALSE	-1.14	0.579	FALSE
Q3U0D7	Arf6	ADP-ribosylation factor 6		GTP-binding protein involved in protein trafficking that regulates endocytic recycling and cytoskeleton remodeling. Required for normal completion of mitotic cytokinesis. May also modulate vesicle budding and uncoating within the Golgi apparatus. Involved in the regulation of dendritic spine development, contributing to the regulation of dendritic branching and filopodia extension.	Golgi apparatus (By similarity). Cell membrane; Lipid-anchor (By similarity). Endosome membrane; Lipid- anchor (By similarity). Recycling endosome membrane; Lipid-anchor (By similarity). Cell projection, filopodium membrane; Lipid- anchor (By similarity). Midbody. Cytoplasm. Cleavage furrow. Note=Recruited to the cell membrane in association with CYTH2 and ARL4C. Colocalizes with DAB2IP at the pl…	3D-structure; Cell cycle; Cell division; Cell membrane;Cell projection; Complete proteome; Cytoplasm; Differentiation;Endosome; ER-Golgi transport; Golgi apparatus; GTP-binding;Lipoprotein; Membrane; Myristate; Neurogenesis; Nucleotide-binding;Protein transport; Reference proteome; Transport.	Arf	GO:0005938;GO:0032154;GO:0005769;GO:0030139;GO:0031527;GO:0005794;GO:0030496;GO:0005886;GO:0055038;GO:0001726;GO:0005525;GO:0003924;GO:0007049;GO:0051301;GO:0030866;GO:0090162;GO:0097284;GO:0001889;GO:0033028;GO:0030838;GO:0090004;GO:0034394;GO:0036010;GO:0015031;GO:0060998;GO:0051489;GO:0035020;GO:0034143;GO:0031529;GO:0007264;GO:0016192	-0.915	0.398	FALSE	-0.693	0.583	FALSE
Q05DE0	Arfgap1	ADP-ribosylation factor GTPase-activating protein 1				Complete proteome; Metal-binding; Reference proteome; Zinc.	ArfGap	GO:0045202;GO:0008060;GO:0005096;GO:0008270;GO:0032312	-0.426	0.311	FALSE	0.261	0.59	FALSE
Q99K28	Arfgap2	ADP-ribosylation factor GTPase-activating protein 2		GTPase-activating protein (GAP) for ADP ribosylation factor 1 (ARF1). May regulate coatomer-mediated protein transport from the Golgi complex to the endoplasmic reticulum. Hydrolysis of ARF1-bound GTP may lead to dissociation of coatomer from Golgi- derived membranes to allow fusion with target membranes (By similarity).	Cytoplasm (By similarity). Golgi apparatus membrane; Peripheral membrane protein; Cytoplasmic side (By similarity). Note=Also found on peripheral punctate structures likely to be endoplasmic reticulum-Golgi intermediate compartment (By similarity).	Acetylation; Alternative splicing; Coiled coil; Complete proteome;Cytoplasm; ER-Golgi transport; Golgi apparatus; GTPase activation;Membrane; Metal-binding; Phosphoprotein; Protein transport;Reference proteome; Transport; Zinc; Zinc-finger.	ArfGap	GO:0000139;GO:0005730;GO:0008060;GO:0008270;GO:0043547;GO:0015031;GO:0032312;GO:0016192	-1.09	0.347	FALSE	-1.56	0.2	FALSE
G3X9K3	Arfgef1	Brefeldin A-inhibited guanine nucleotide-exchange protein 1		Promotes guanine-nucleotide exchange on ARF1 and ARF3. Promotes the activation of ARF1/ARF3 through replacement of GDP with GTP. Involved in vesicular trafficking. Required for the maintenance of Golgi structure; the function may be independent of its GEF activity. Required for the maturaion of integrin beta-1 in the Golgi. Involved in the establishment and persistence of cell polarity during dir…	Cytoplasm (By similarity). Cytoplasm, perinuclear region (By similarity). Golgi apparatus (By similarity). Golgi apparatus, trans-Golgi network (By similarity). Nucleus (By similarity). Nucleus, nucleolus (By similarity). Nucleus matrix (By similarity). Membrane (By similarity). Note=Translocates from cytoplasm to membranes and nucleus upon cAMP treatment (By similarity).	Complete proteome; Cytoplasm; Golgi apparatus;Guanine-nucleotide releasing factor; Membrane; Nucleus;Phosphoprotein; Protein transport; Reference proteome; Transport.	DUF1981; Sec7	GO:0005829;GO:0000139;GO:0016363;GO:0005730;GO:0048471;GO:0030532;GO:0005802;GO:0005086;GO:0034237;GO:0010256;GO:0007030;GO:0030837;GO:0034259;GO:0090284;GO:0090303;GO:0015031;GO:0032012;GO:2000114;GO:0016192	-0.332	0.755	FALSE	0.38	0.741	FALSE
A2A5R2	Arfgef2	Brefeldin A-inhibited guanine nucleotide-exchange protein 2		Promotes guanine-nucleotide exchange on ARF1 and ARF3 and to a lower extend on ARF5 and ARF6. Promotes the activation of ARF1/ARF5/ARF6 through replacement of GDP with GTP. Involved in the regulation of Golgi vesicular transport. Required for the integrity of the endosomal compartment. Involved in trafficking from the trans-Golgi network (TGN) to endosomes and is required for membrane association…	Cytoplasm (By similarity). Membrane (By similarity). Golgi apparatus (By similarity). Cytoplasm, perinuclear region (By similarity). Golgi apparatus, trans-Golgi network (By similarity). Endosome (By similarity). Cytoplasm, cytoskeleton, microtubule organizing center, centrosome (By similarity). Cell projection, dendrite (By similarity). Cytoplasmic vesicle (By similarity). Cell junction, synapse…	Acetylation; Cell junction; Cell projection; Complete proteome;Cytoplasm; Cytoplasmic vesicle; Cytoskeleton; Endosome;Golgi apparatus; Guanine-nucleotide releasing factor; Membrane;Phosphoprotein; Protein transport; Reference proteome; Synapse;Transport.	DUF1981; Sec7	GO:0032279;GO:0005879;GO:0030054;GO:0016023;GO:0031410;GO:0005829;GO:0043197;GO:0000139;GO:0005815;GO:0048471;GO:0055037;GO:0032280;GO:0005802;GO:0005086;GO:0050811;GO:0034237;GO:0010256;GO:0007032;GO:0006887;GO:0006893;GO:0035556;GO:0032760;GO:0015031;GO:0001881;GO:0032012	-0.163	0.863	FALSE	0.095	0.94	FALSE
G5E8V9	Arfip1					Complete proteome; Reference proteome.	Arfaptin	GO:0005829;GO:0000139;GO:0006886;GO:0050708	-0.743	0.635	FALSE	1	0.554	FALSE
Q8BQW4	Arhgap1	Rho GTPase-activating protein 1				Complete proteome; Reference proteome.	CRAL_TRIO_2; RhoGAP	GO:0043231;GO:0005886;GO:0001726;GO:0030675;GO:0007264	-0.0229	0.987	FALSE	-0.214	0.912	FALSE
S4R1B0	Arhgap12	Rho GTPase-activating protein 12				Complete proteome; Reference proteome.	WW		-1.02	0.249	FALSE	-0.803	0.403	FALSE
Q8K0Q5	Arhgap18	Rho GTPase-activating protein 18		GTPase activator for the Rho-type GTPases by converting them to an inactive GDP-bound state (By similarity).		Complete proteome; GTPase activation; Reference proteome.	RhoGAP	GO:0005622;GO:0005096;GO:0043547;GO:0007165	-0.365	0.608	FALSE	-0.705	0.338	FALSE
Q8BYW1-3	Arhgap25	Rho GTPase-activating protein 25		GTPase activator for the Rho-type GTPases by converting them to an inactive GDP-bound state (By similarity).		Alternative splicing; Coiled coil; Complete proteome;GTPase activation; Phosphoprotein; Reference proteome.	PH; RhoGAP	GO:0005622;GO:0005096;GO:0043547;GO:0007165	-0.839	0.435	FALSE	-0.217	0.887	FALSE
E9QMX7	Arhgap30	Rho GTPase-activating protein 30				Complete proteome; Reference proteome.	RhoGAP	GO:0005622;GO:0007165	-1.24	0.101	FALSE	-0.549	0.512	FALSE
Q3TE27	Arhgap4;mKIAA0131					Complete proteome; Reference proteome; SH3 domain.	FCH; RhoGAP; SH3_2	GO:0005622;GO:0007165	-0.32	0.693	FALSE	-1.2	0.123	FALSE
Q99PT1	Arhgdia	Rho GDP-dissociation inhibitor 1		Controls Rho proteins homeostasis. Regulates the GDP/GTP exchange reaction of the Rho proteins by inhibiting the dissociation of GDP from them, and the subsequent binding of GTP to them. Retains Rho proteins such as CDC42, RAC1 and RHOA in an inactive cytosolic pool, regulating their stability and protecting them from degradation. Actively involved in the recycling and distribution of activated R…	Cytoplasm.	3D-structure; Acetylation; Complete proteome; Cytoplasm;Direct protein sequencing; GTPase activation; Phosphoprotein;Reference proteome.	Rho_GDI	GO:0005737;GO:0001772;GO:0005096;GO:0005094;GO:0043547;GO:0032880;GO:0007266	-0.25	0.55	FALSE	0.114	0.833	FALSE
Q61599	Arhgdib	Rho GDP-dissociation inhibitor 2		Regulates the GDP/GTP exchange reaction of the Rho proteins by inhibiting the dissociation of GDP from them, and the subsequent binding of GTP to them.	Cytoplasm.	Acetylation; Complete proteome; Cytoplasm; GTPase activation;Phosphoprotein; Reference proteome.	Rho_GDI	GO:0005737;GO:0005096;GO:0005094;GO:0043547	0.187	0.841	FALSE	0.742	0.415	FALSE
E9PUF7	Arhgef1	Rho guanine nucleotide exchange factor 1				Complete proteome; Reference proteome.	RGS-like; RhoGEF	GO:0005737;GO:0005089;GO:0032319;GO:0038032	-0.0809	0.885	FALSE	-0.614	0.256	FALSE
Q3TYZ4	Arhgef2	Rho guanine nucleotide exchange factor 2				Complete proteome; Metal-binding; Reference proteome; Zinc.	C1_1	GO:0043198;GO:0043025;GO:0046872;GO:0008017;GO:0005089;GO:0007015;GO:0000902;GO:0035556	-1.67	0.0462	TRUE	-0.835	0.334	FALSE
F6WMJ3	Arhgef6	Rho guanine nucleotide exchange factor 6				Complete proteome; Guanine-nucleotide releasing factor;Reference proteome.	CH; PH; RhoGEF	GO:0005737;GO:0005089;GO:0035556;GO:0032319	-0.847	0.355	FALSE	-1.06	0.282	FALSE
D3Z0V2	Arhgef7	Rho guanine nucleotide exchange factor 7				Complete proteome; Guanine-nucleotide releasing factor;Reference proteome.	PH; RhoGEF; SH3_2	GO:0005089;GO:0035556;GO:0032319	-1.7	0.15	FALSE	-0.759	0.573	FALSE
E9QAQ7	Arid1a	AT-rich interactive domain-containing protein 1A				Complete proteome; Nucleus; Reference proteome.	ARID; DUF3518	GO:0000790;GO:0016514;GO:0003677;GO:0043044;GO:0003205;GO:0030900;GO:0000122;GO:0001843;GO:0003408;GO:0060674	-0.83	0.236	FALSE	-0.405	0.619	FALSE
E9Q6R4	Arid1b					Complete proteome; Nucleus; Reference proteome.	ARID; DUF3518	GO:0005634;GO:0003677	-0.353	0.688	FALSE	-0.0113	0.996	FALSE
Q9Z1K5	Arih1	E3 ubiquitin-protein ligase ARIH1		E3 ubiquitin-protein ligase, which catalyzes polyubiquitination of target proteins together with ubiquitin- conjugating enzyme E2 UBE2L3. May play a role in protein translation by mediating polyubiquitination of EIF4E2, leading to its subsequent degradation. Acts as the ligase involved in ISGylation of EIF4E2 (By similarity).	Cytoplasm (By similarity). Note=Mainly cytoplasmic (By similarity).	Acetylation; Coiled coil; Complete proteome; Cytoplasm; Ligase;Metal-binding; Reference proteome; Repeat; Ubl conjugation pathway;Zinc; Zinc-finger.	IBR	GO:0005737;GO:0004842;GO:0008270;GO:0006511	-0.574	0.232	FALSE	-0.195	0.74	FALSE
Q3TK92	Arih2	E3 ubiquitin-protein ligase ARIH2		E3 ubiquitin-protein ligase mediating 'Lys-48'-and 'Lys- 63'-linked polyubiquitination and subsequent proteasomal degradation of modified proteins. May play a role in myelopoiesis (By similarity).	Nucleus. Cytoplasm (By similarity).	Coiled coil; Complete proteome; Cytoplasm; Ligase; Metal-binding;Nucleus; Phosphoprotein; Reference proteome; Repeat; Ubl conjugation;Ubl conjugation pathway; Zinc; Zinc-finger.	IBR	GO:0005737;GO:0005634;GO:0003676;GO:0004842;GO:0008270;GO:0048588;GO:0071425;GO:0070936;GO:0070534;GO:0042787	-1.06	0.259	FALSE	-0.6	0.583	FALSE
Q9D0J4	Arl2	ADP-ribosylation factor-like protein 2		Small GTP-binding protein which cycles between an inactive GDP-bound and an active GTP-bound form, and the rate of cycling is regulated by guanine nucleotide exchange factors (GEF) and GTPase-activating proteins (GAP). GTP-binding protein that does not act as an allosteric activator of the cholera toxin catalytic subunit. Regulates formation of new microtubules and centrosome integrity. Prevents …	Mitochondrion intermembrane space. Cytoplasm, cytoskeleton, microtubule organizing center, centrosome. Nucleus. Cytoplasm. Note=The complex formed with ARL2BP, ARL2 and SLC25A6 is expressed in mitochondria. Not detected in the Golgi, nucleus and on the mitotic spindle. Centrosome-associated throughout the cell cycle. Not detected to interphase microtubules (By similarity). The complex formed with…	3D-structure; Cell cycle; Complete proteome; Cytoplasm; Cytoskeleton;GTP-binding; Isopeptide bond; Lipoprotein; Mitochondrion; Myristate;Nucleotide-binding; Nucleus; Reference proteome; Ubl conjugation.	Arf	GO:0005813;GO:0005737;GO:0016328;GO:0005758;GO:0005634;GO:0019003;GO:0005525;GO:0003924;GO:0007049;GO:0051297;GO:0051457;GO:0034260;GO:0010811;GO:0031116;GO:0007264;GO:0070830	-0.814	0.554	FALSE	-1.56	0.274	FALSE
Q543P7	Arl3	ADP-ribosylation factor-like protein 3		Small GTP-binding protein which cycles between an inactive GDP-bound and an active GTP-bound form, and the rate of cycling is regulated by guanine nucleotide exchange factors (GEF) and GTPase-activating proteins (GAP). Required for normal cytokinesis and cilia signaling. Required for targeting proteins such as NPHP3 to the ciliary membrane by releasing myristoylated NPHP3 from UNC119B cargo adapt…	Golgi apparatus membrane; Peripheral membrane protein; Cytoplasmic side. Cytoplasm, cytoskeleton, spindle. Nucleus. Cytoplasm, cytoskeleton, microtubule organizing center, centrosome (By similarity). Cytoplasm (By similarity). Cell projection, cilium (By similarity). Note=Detected predominantly in the photoreceptor connecting cilium. Centrosome- associated throughout the cell cycle. Not detected …	3D-structure; Cell cycle; Cell division; Cell projection;Complete proteome; Cytoplasm; Cytoskeleton; Golgi apparatus;GTP-binding; Lipoprotein; Magnesium; Membrane; Metal-binding;Myristate; Nucleotide-binding; Nucleus; Phosphoprotein;Protein transport; Reference proteome; Transport.	Arf	GO:0005813;GO:0005881;GO:0005794;GO:0000139;GO:0030496;GO:0005634;GO:0032391;GO:0005886;GO:0005876;GO:0019003;GO:0005525;GO:0003924;GO:0046872;GO:0008017;GO:0060271;GO:0000910;GO:0042073;GO:0001822;GO:0042461;GO:0015031;GO:0007264;GO:0007224	-1.09	0.463	FALSE	-1.94	0.209	FALSE
F6QKK2	Arl8a;Arl8b	ADP-ribosylation factor-like protein 8A;ADP-ribosylation factor-like protein 8B				Complete proteome; GTP-binding; Nucleotide-binding;Reference proteome.	Arf	GO:0005622;GO:0005525;GO:0007264	-0.264	0.886	FALSE	0.479	0.833	FALSE
Q9D0L7-2	Armc10	Armadillo repeat-containing protein 10				Complete proteome; Reference proteome.	Arm_2	GO:0005739	-0.758	0.286	FALSE	-1.07	0.15	FALSE
A6H630	Armt1;1700052N19Rik	Protein-glutamate O-methyltransferase				Acetylation; Alternative splicing; Complete proteome;Reference proteome.	DUF89		-1.32	0.359	FALSE	-1.11	0.496	FALSE
Q3URM6	Arnt	Aryl hydrocarbon receptor nuclear translocator				Complete proteome; DNA-binding; Nucleus; Reference proteome; Repeat;Transcription; Transcription regulation.	HLH; PAS	GO:0005737;GO:0005634;GO:0005667;GO:0004874;GO:0003677;GO:0003700;GO:0003713;GO:0030154;GO:0001892;GO:0045944;GO:0001666;GO:0009636;GO:0006351	-2.65	0.246	FALSE	0.881	0.751	FALSE
Q9R0Q6	Arpc1a	Actin-related protein 2/3 complex subunit 1A		Probably functions as component of the Arp2/3 complex which is involved in regulation of actin polymerization and together with an activating nucleation-promoting factor (NPF) mediates the formation of branched actin networks.	Cytoplasm, cytoskeleton (Probable).	Actin-binding; Complete proteome; Cytoplasm; Cytoskeleton;Direct protein sequencing; Reference proteome; Repeat; WD repeat.	WD40	GO:0005885;GO:0005737;GO:0030833	-0.965	0.372	FALSE	-1.15	0.332	FALSE
Q3TCE7	Arpc1b	Actin-related protein 2/3 complex subunit 1B				Complete proteome; Reference proteome.		GO:0005885;GO:0030833	-0.0564	0.881	FALSE	0.0395	0.938	FALSE
Q9CVB6	Arpc2	Actin-related protein 2/3 complex subunit 2		Functions as actin-binding component of the Arp2/3 complex which is involved in regulation of actin polymerization and together with an activating nucleation-promoting factor (NPF) mediates the formation of branched actin networks. Seems to contact the mother actin filament (By similarity).	Cytoplasm, cytoskeleton (By similarity). Cell projection (By similarity). Cell junction, synapse, synaptosome.	Acetylation; Actin-binding; Cell junction; Cell projection;Complete proteome; Cytoplasm; Cytoskeleton; Direct protein sequencing;Reference proteome; Synapse; Synaptosome.	P34-Arc	GO:0005885;GO:0031252;GO:0042995;GO:0005768;GO:0005925;GO:0005794;GO:0005886;GO:0030838;GO:1900026	-0.0703	0.93	FALSE	-0.818	0.279	FALSE
Q9JM76	Arpc3	Actin-related protein 2/3 complex subunit 3		Functions as component of the Arp2/3 complex which is involved in regulation of actin polymerization and together with an activating nucleation-promoting factor (NPF) mediates the formation of branched actin networks (By similarity).	Cytoplasm, cytoskeleton (By similarity). Cell projection (By similarity).	Acetylation; Actin-binding; Cell projection; Complete proteome;Cytoplasm; Cytoskeleton; Direct protein sequencing; Phosphoprotein;Reference proteome.	P21-Arc	GO:0005885;GO:0005737;GO:0030027;GO:0034314	0.163	0.781	FALSE	0.453	0.421	FALSE
Q9D3C4	Arpc4	Actin-related protein 2/3 complex subunit 4				Complete proteome; Reference proteome.	ARPC4	GO:0005885;GO:0030041;GO:0034314	-0.727	0.565	FALSE	-0.84	0.552	FALSE
Q3TKM9	Arpc5	Actin-related protein 2/3 complex subunit 5		Functions as component of the Arp2/3 complex which is involved in regulation of actin polymerization and together with an activating nucleation-promoting factor (NPF) mediates the formation of branched actin networks (By similarity).	Cytoplasm, cytoskeleton (By similarity). Cell projection (By similarity).	Acetylation; Actin-binding; Cell projection; Complete proteome;Cytoplasm; Cytoskeleton; Reference proteome; Ubl conjugation.	P16-Arc	GO:0005885;GO:0005737;GO:0030027;GO:0030833	4	0.0253	TRUE	-0.0153	0.997	FALSE
Q3TKM9	Arpc5	Actin-related protein 2/3 complex subunit 5		Functions as component of the Arp2/3 complex which is involved in regulation of actin polymerization and together with an activating nucleation-promoting factor (NPF) mediates the formation of branched actin networks (By similarity).	Cytoplasm, cytoskeleton (By similarity). Cell projection (By similarity).	Acetylation; Actin-binding; Cell projection; Complete proteome;Cytoplasm; Cytoskeleton; Reference proteome; Ubl conjugation.	P16-Arc	GO:0005885;GO:0005737;GO:0030027;GO:0030833	4	0.0253	TRUE	-0.0153	0.997	FALSE
Q9D898	Arpc5l	Actin-related protein 2/3 complex subunit 5-like protein		May function as component of the Arp2/3 complex which is involved in regulation of actin polymerization and together with an activating nucleation-promoting factor (NPF) mediates the formation of branched actin networks (By similarity).	Cytoplasm, cytoskeleton (By similarity).	Actin-binding; Complete proteome; Cytoplasm; Cytoskeleton;Direct protein sequencing; Phosphoprotein; Reference proteome.	P16-Arc	GO:0005737;GO:0005856;GO:0030833	0.934	0.0372	FALSE	1.12	0.0152	TRUE
P56212	Arpp19;Ensa	cAMP-regulated phosphoprotein 19;Alpha-endosulfine		Protein phosphatase inhibitor that specifically inhibits protein phosphatase 2A (PP2A) during mitosis. When phosphorylated at Ser-62 during mitosis, specifically interacts with PPP2R2D (PR55-delta) and inhibits its activity, leading to inactivation of PP2A, an essential condition to keep cyclin-B1-CDK1 activity high during M phase. May indirectly enhance GAP-43 expression by binding to the NGF-re…	Cytoplasm (By similarity).	Acetylation; Alternative splicing; Cell cycle; Cell division;Complete proteome; Cytoplasm; Mitosis; Phosphoprotein;Protein phosphatase inhibitor; Reference proteome.	Endosulfine	GO:0005737;GO:0019212;GO:0051721;GO:0004864;GO:0008601;GO:0000086;GO:0007067	2.46	0.00687	TRUE	0.899	0.272	FALSE
J3QNU6	Arrb1	Beta-arrestin-1				Complete proteome; Reference proteome.	Arrestin_C; Arrestin_N	GO:0005622;GO:0007602;GO:0008277	-0.79	0.177	FALSE	-0.604	0.338	FALSE
B2RWQ7	Arsb	Arylsulfatase B	Yes		Lysosome.	Alternative splicing; Calcium; Complete proteome; Disulfide bond;Glycoprotein; Hydrolase; Lysosome; Metal-binding; Reference proteome;Signal.	Sulfatase	GO:0005794;GO:0005764;GO:0005739;GO:0005791;GO:0004065;GO:0046872;GO:0003943;GO:0006914;GO:0007417;GO:0043627;GO:0051597;GO:0007584;GO:0009268	-0.286	0.781	FALSE	-2.17	0.0268	TRUE
Q78P93	Asah1	Acid ceramidase;Acid ceramidase subunit alpha;Acid ceramidase subunit beta	Yes	Hydrolyzes the sphingolipid ceramide into sphingosine and free fatty acid.	Lysosome.	Complete proteome; Glycoprotein; Hydrolase; Lysosome;Reference proteome; Signal.	CBAH	GO:0005764;GO:0017040;GO:0006629;GO:0030324;GO:0010033	-2.1	0.0875	FALSE	-1.62	0.199	FALSE
E9PU93	Ash2l	Set1/Ash2 histone methyltransferase complex subunit ASH2				Complete proteome; Reference proteome.	SPRY	GO:0035097;GO:0048188;GO:0042800;GO:0044212;GO:0006974;GO:0018022;GO:0008284;GO:0045944;GO:0043627	-0.932	0.256	FALSE	-1.07	0.214	FALSE
Q3UUH0	Asl	Argininosuccinate lyase				Complete proteome; Reference proteome.	Lyase_1	GO:0004056;GO:0019676;GO:0042450;GO:0007626;GO:0009791	-0.353	0.459	FALSE	-0.0515	0.944	FALSE
O54984	Asna1	ATPase Asna1		ATPase required for the post-translational delivery of tail-anchored (TA) proteins to the endoplasmic reticulum. Recognizes and selectively binds the transmembrane domain of TA proteins in the cytosol. This complex then targets to the endoplasmic reticulum by membrane-bound receptors, where the tail- anchored protein is released for insertion. This process is regulated by ATP binding and hydrolys…	Cytoplasm (By similarity). Endoplasmic reticulum (By similarity). Nucleus, nucleolus (By similarity).	Acetylation; ATP-binding; Complete proteome; Cytoplasm;Direct protein sequencing; Endoplasmic reticulum; Hydrolase;Metal-binding; Nucleotide-binding; Nucleus; Reference proteome;Transport; Zinc.	ArsA_ATPase	GO:0005783;GO:0005730;GO:0005524;GO:0016887;GO:0046872;GO:0006200;GO:0045048;GO:0006810	-0.521	0.82	FALSE	-1.32	0.565	FALSE
Q61024	Asns	Asparagine synthetase [glutamine-hydrolyzing]				Acetylation; Amino-acid biosynthesis; Asparagine biosynthesis;ATP-binding; Complete proteome; Glutamine amidotransferase; Ligase;Nucleotide-binding; Reference proteome.	Asn_synthase; GATase_7	GO:0004066;GO:0005524;GO:0048037;GO:0042149;GO:0032870;GO:0006541;GO:0070981;GO:0001889;GO:0043066;GO:0045931;GO:0043200;GO:0032354;GO:0009416;GO:0009612;GO:0031427;GO:0009636	-0.709	0.0876	FALSE	-0.422	0.334	FALSE
Q8VBT9	Aspscr1	Tether containing UBX domain for GLUT4		Enhances VCP methylation catalyzed by VCPKMT (By similarity). Tethering protein that sequesters GLUT4-containing vesicles in the cytoplasm in the absence of insulin. Modulates the amount of GLUT4 that is available at the cell surface.	Endomembrane system; Peripheral membrane protein. Cytoplasm (By similarity). Nucleus (By similarity).	3D-structure; Acetylation; Alternative splicing; Complete proteome;Cytoplasm; Membrane; Nucleus; Phosphoprotein; Reference proteome.	TUG-UBL1; UBX	GO:0009898;GO:0030659;GO:0005829;GO:0012505;GO:0019898;GO:0005634;GO:0048471;GO:0042593;GO:0006886;GO:0046324	-0.93	0.189	FALSE	-1.1	0.135	FALSE
Q8C0M9	Asrgl1	Isoaspartyl peptidase/L-asparaginase;Isoaspartyl peptidase/L-asparaginase alpha chain;Isoaspartyl peptidase/L-asparaginase beta chain		Has both L-asparaginase and beta-aspartyl peptidase activity. May be involved in the production of L-aspartate, which can act as an excitatory neurotransmitter in some brain regions. Is highly active with L-Asp beta-methyl ester. Besides, has catalytic activity toward beta-aspartyl dipeptides and their methyl esters, including beta-L-Asp-L-Phe, beta-L-Asp-L-Phe methyl ester (aspartame), beta-L-As…	Cytoplasm (By similarity). Note=Midpiece of sperm tail (By similarity).	Autocatalytic cleavage; Complete proteome; Cytoplasm;Direct protein sequencing; Hydrolase; Protease; Reference proteome.	Asparaginase_2	GO:0005737;GO:0015630;GO:0005634;GO:0004067;GO:0008798;GO:0003948;GO:0033345;GO:0006508	-0.0769	0.879	FALSE	0.607	0.202	FALSE
Q3UJ34	Ass1;Gm5424	Argininosuccinate synthase		Is indirectly involved in the control of blood pressure (By similarity).		Amino-acid biosynthesis; Arginine biosynthesis; ATP-binding;Complete proteome; Direct protein sequencing; Ligase;Nucleotide-binding; Phosphoprotein; Reference proteome; Urea cycle.	Arginosuc_synth	GO:0005739;GO:0004055;GO:0005524;GO:0006526;GO:0000050	0.378	0.545	FALSE	-0.262	0.724	FALSE
Q8QZV7	Asun	Protein asunder homolog		Crucial regulator of the mitotic cell cycle and development (By similarity). At prophase, required for dynein anchoring to the nuclear envelope important for proper centrosome- nucleus coupling. At G2/M phase, may be required for proper spindle formation and execution of cytokinesis (By similarity).	Cytoplasm.	Cell cycle; Cell division; Complete proteome; Cytoplasm; Mitosis;Phosphoprotein; Reference proteome.	DUF2151	GO:0005737;GO:0005634;GO:0007067;GO:0080154;GO:0007346;GO:0030317	-1.25	0.134	FALSE	-0.833	0.348	FALSE
Q3UUL7	Ate1	Arginyl-tRNA--protein transferase 1		Involved in the post-translational conjugation of arginine to the N-terminal aspartate or glutamate of a protein. This arginylation is required for degradation of the protein via the ubiquitin pathway. Does not arginylate cysteine residues (By similarity).		Acyltransferase; Complete proteome; Reference proteome; Transferase;Ubl conjugation pathway.	ATE_C; ATE_N	GO:0005737;GO:0005634;GO:0004057;GO:0016598	-1.03	0.434	FALSE	0.0175	0.996	FALSE
Q9CPX6	Atg3	Ubiquitin-like-conjugating enzyme ATG3		E2 conjugating enzyme required for the cytoplasm to vacuole transport (Cvt), autophagy, and mitochondrial homeostasis. Responsible for the E2-like covalent binding of phosphatidylethanolamine to the C-terminal Gly of ATG8-like proteins (GABARAP, GABARAPL1, GABARAPL2 or MAP1LC3A). The ATG12- ATG5 conjugate plays a role of an E3 and promotes the transfer of ATG8-like proteins from ATG3 to phosphati…	Cytoplasm (By similarity).	Acetylation; Autophagy; Complete proteome; Cytoplasm; Isopeptide bond;Ligase; Protein transport; Reference proteome; Transport;Ubl conjugation; Ubl conjugation pathway.	Autophagy_act_C; Autophagy_Cterm; Autophagy_N	GO:0000153;GO:0005829;GO:0019777;GO:0019776;GO:0000045;GO:0043653;GO:0015031;GO:0016567;GO:1902017	-1.24	0.52	FALSE	-0.875	0.706	FALSE
A0A0R4J065	Atg4b	Cysteine protease ATG4B				Autophagy; Complete proteome; Cytoplasm; Hydrolase; Protease;Protein transport; Reference proteome; Thiol protease; Transport.	Peptidase_C54	GO:0005737;GO:0008234;GO:0006914;GO:0015031;GO:0006508	-1.53	0.0537	FALSE	-0.476	0.589	FALSE
S4R2D5	Atg7	Ubiquitin-like modifier-activating enzyme ATG7				Complete proteome; Reference proteome.	ThiF	GO:0005737;GO:0004839;GO:0007628;GO:0006914;GO:0055013;GO:0006520;GO:0021955;GO:0021680;GO:0021987;GO:0001889;GO:0061024;GO:0007005;GO:0043066;GO:0050877;GO:0031401;GO:0009791;GO:0030163;GO:0006497;GO:0032446;GO:0021860;GO:0031396;GO:0042594	0.241	0.557	FALSE	-0.015	0.985	FALSE
Q8BP56	Athl1	Acid trehalase-like protein 1				Alternative splicing; Complete proteome; Glycosidase; Hydrolase;Reference proteome.	Glyco_hydro_65m	GO:0016798;GO:0005975	0.734	0.455	FALSE	-0.411	0.729	FALSE
Q9CWJ9	Atic	Bifunctional purine biosynthesis protein PURH;Phosphoribosylaminoimidazolecarboxamide formyltransferase;IMP cyclohydrolase		Bifunctional enzyme that catalyzes 2 steps in purine biosynthesis (By similarity).		Acetylation; Complete proteome; Direct protein sequencing; Hydrolase;Multifunctional enzyme; Purine biosynthesis; Reference proteome;Transferase.	AICARFT_IMPCHas; MGS	GO:0005739;GO:0003937;GO:0004643;GO:0042803;GO:0006189;GO:0003360;GO:0021549;GO:0021987;GO:0046452;GO:0009116;GO:0031100;GO:0010035;GO:0046654	-0.0326	0.936	FALSE	-0.0308	0.955	FALSE
O08997	Atox1	Copper transport protein ATOX1		Binds and deliver cytosolic copper to the copper ATPase proteins. May be important in cellular antioxidant defense (By similarity).		Acetylation; Chaperone; Complete proteome; Copper; Copper transport;Ion transport; Metal-binding; Reference proteome; Transport.	HMA	GO:0016531;GO:0006878;GO:0006825;GO:0006979	-0.677	0.348	FALSE	0.0612	0.955	FALSE
Q3TXF9	Atp1a1;Atp1a2;Atp1a3;Atp1a4;Atp4a;Atp12a	Sodium/potassium-transporting ATPase subunit alpha-1;Sodium/potassium-transporting ATPase subunit alpha-3;Sodium/potassium-transporting ATPase subunit alpha-2;Sodium/potassium-transporting ATPase subunit alpha-4;Potassium-transporting ATPase alpha chain 1;Potassium-transporting ATPase alpha chain 2				ATP-binding; Complete proteome; Hydrolase; Membrane;Nucleotide-binding; Reference proteome; Transmembrane;Transmembrane helix.	Cation_ATPase_C; Cation_ATPase_N; E1-E2_ATPase; H-K_ATPase_N	GO:0016021;GO:0005886;GO:0005524;GO:0008900;GO:0000287;GO:0006754;GO:0015991;GO:0045851;GO:0010155;GO:0042493	0.388	0.538	FALSE	-0.351	0.628	FALSE
Q544Q7	Atp1b3	Sodium/potassium-transporting ATPase subunit beta-3		This is the non-catalytic component of the active enzyme, which catalyzes the hydrolysis of ATP coupled with the exchange of Na(+) and K(+) ions across the plasma membrane. The exact function of the beta-3 subunit is not known.	Cell membrane; Single-pass type II membrane protein. Melanosome (By similarity).	Cell membrane; Complete proteome; Direct protein sequencing;Disulfide bond; Glycoprotein; Ion transport; Membrane; Potassium;Potassium transport; Reference proteome; Signal-anchor; Sodium;Sodium transport; Sodium/potassium transport; Transmembrane;Transmembrane helix; Transport.	Na_K-ATPase	GO:0005901;GO:0005737;GO:0042470;GO:0005890;GO:0005391;GO:0006200;GO:0071805;GO:0035725	1.17	0.298	FALSE	-1.28	0.287	FALSE
G5E829	Atp2b1;Atp2b3;Atp2b2	Plasma membrane calcium-transporting ATPase 1;Calcium-transporting ATPase;Plasma membrane calcium-transporting ATPase 2				ATP-binding; Complete proteome; Hydrolase; Membrane;Nucleotide-binding; Reference proteome; Transmembrane;Transmembrane helix.	ATP_Ca_trans_C; Cation_ATPase_C; Cation_ATPase_N; E1-E2_ATPase; Hydrolase	GO:0005887;GO:0005524;GO:0005388;GO:0046872;GO:0006200;GO:0006816	0.422	0.608	FALSE	-1.34	0.101	FALSE
Q6Q477-2	Atp2b4	Calcium-transporting ATPase				ATP-binding; Complete proteome; Hydrolase; Membrane;Nucleotide-binding; Reference proteome; Transmembrane;Transmembrane helix.	ATP_Ca_trans_C; Cation_ATPase_C; Cation_ATPase_N; E1-E2_ATPase; Hydrolase	GO:0005887;GO:0005524;GO:0005388;GO:0046872;GO:0006200;GO:0006816	0.302	0.716	FALSE	-1.6	0.0457	TRUE
Q03265	Atp5a1	ATP synthase subunit alpha, mitochondrial;ATP synthase subunit alpha		Mitochondrial membrane ATP synthase (F(1)F(0) ATP synthase or Complex V) produces ATP from ADP in the presence of a proton gradient across the membrane which is generated by electron transport complexes of the respiratory chain. F-type ATPases consist of two structural domains, F(1) - containing the extramembraneous catalytic core, and F(0) - containing the membrane proton channel, linked togethe…	Mitochondrion inner membrane (By similarity). Cell membrane; Peripheral membrane protein; Extracellular side (By similarity). Note=Colocalizes with HRG on the cell surface of T-cells (By similarity).	Acetylation; ATP synthesis; ATP-binding; Cell membrane; CF(1);Complete proteome; Direct protein sequencing; Hydrogen ion transport;Ion transport; Membrane; Mitochondrion; Mitochondrion inner membrane;Nucleotide-binding; Phosphoprotein; Pyrrolidone carboxylic acid;Reference proteome; Transit peptide; Transport.	ATP-synt_ab; ATP-synt_ab_C; ATP-synt_ab_N	GO:0008180;GO:0005753;GO:0005886;GO:0045261;GO:0005524;GO:0046933;GO:0046961;GO:0015991;GO:0015986;GO:0009790;GO:0006629;GO:0001937	1.23	0.184	FALSE	0.412	0.714	FALSE
P56480	Atp5b	ATP synthase subunit beta, mitochondrial		Mitochondrial membrane ATP synthase (F(1)F(0) ATP synthase or Complex V) produces ATP from ADP in the presence of a proton gradient across the membrane which is generated by electron transport complexes of the respiratory chain. F-type ATPases consist of two structural domains, F(1) - containing the extramembraneous catalytic core, and F(0) - containing the membrane proton channel, linked togethe…	Mitochondrion. Mitochondrion inner membrane. Note=Peripheral membrane protein.	Acetylation; ATP synthesis; ATP-binding; CF(1); Complete proteome;Direct protein sequencing; Hydrogen ion transport; Hydrolase;Ion transport; Membrane; Mitochondrion; Mitochondrion inner membrane;Nucleotide-binding; Phosphoprotein; Reference proteome;Transit peptide; Transport.	ATP-synt_ab; ATP-synt_ab_C; ATP-synt_ab_N	GO:0009986;GO:0042645;GO:0005753;GO:0005886;GO:0045261;GO:0005524;GO:0046933;GO:0046961;GO:0001525;GO:0015991;GO:0015986;GO:0006629;GO:0006933;GO:0051453	1.71	0.0176	TRUE	0.99	0.145	FALSE
Q3TF25	Atp5o	ATP synthase subunit O, mitochondrial				Complete proteome; Reference proteome.	OSCP	GO:0005739;GO:0046933;GO:0006200;GO:0015986	1.22	0.147	FALSE	0.0623	0.959	FALSE
P50516	Atp6v1a	V-type proton ATPase catalytic subunit A		Catalytic subunit of the peripheral V1 complex of vacuolar ATPase. V-ATPase vacuolar ATPase is responsible for acidifying a variety of intracellular compartments in eukaryotic cells.		Alternative splicing; ATP-binding; Complete proteome;Direct protein sequencing; Hydrogen ion transport; Hydrolase;Ion transport; Nucleotide-binding; Reference proteome; Transport.	ATP-synt_ab; ATP-synt_ab_C; ATP-synt_ab_N	GO:0016324;GO:0005829;GO:0005902;GO:0005739;GO:0033180;GO:0005524;GO:0046961;GO:0006200;GO:0015991	-0.33	0.518	FALSE	-0.233	0.703	FALSE
P62814	Atp6v1b2;Atp6v1b1	V-type proton ATPase subunit B, brain isoform		Non-catalytic subunit of the peripheral V1 complex of vacuolar ATPase. V-ATPase is responsible for acidifying a variety of intracellular compartments in eukaryotic cells.	Endomembrane system; Peripheral membrane protein. Melanosome (By similarity). Note=Endomembrane.	Complete proteome; Direct protein sequencing; Hydrogen ion transport;Hydrolase; Ion transport; Membrane; Reference proteome; Transport.	ATP-synt_ab; ATP-synt_ab_C; ATP-synt_ab_N	GO:0005829;GO:0005794;GO:0016021;GO:0042470;GO:0005902;GO:0005886;GO:0033180;GO:0005524;GO:0016820;GO:0015991;GO:0046034	0.0333	0.941	FALSE	0.0224	0.97	FALSE
P50518	Atp6v1e1;Atp6v1e2	V-type proton ATPase subunit E 1;V-type proton ATPase subunit E 2		Subunit of the peripheral V1 complex of vacuolar ATPase essential for assembly or catalytic function. V-ATPase is responsible for acidifying a variety of intracellular compartments in eukaryotic cells.		Acetylation; Complete proteome; Direct protein sequencing;Hydrogen ion transport; Hydrolase; Ion transport; Phosphoprotein;Reference proteome; Transport.	vATP-synt_E	GO:0016324;GO:0005829;GO:0005768;GO:0005902;GO:0005739;GO:0033178;GO:0008553;GO:0046961;GO:0015991	-0.389	0.359	FALSE	-0.243	0.628	FALSE
Q9D1K2	Atp6v1f	V-type proton ATPase subunit F		Subunit of the peripheral V1 complex of vacuolar ATPase essential for assembly or catalytic function. V-ATPase is responsible for acidifying a variety of intracellular compartments in eukaryotic cells.		Complete proteome; Direct protein sequencing; Hydrogen ion transport;Ion transport; Reference proteome; Transport.	ATP-synt_F	GO:0033180;GO:0016471;GO:0046961;GO:0006200;GO:0015991	-1.02	0.501	FALSE	0.0969	0.965	FALSE
Q5HZY7	Atp6v1g1	V-type proton ATPase subunit G 1		Catalytic subunit of the peripheral V1 complex of vacuolar ATPase (V-ATPase). V-ATPase is responsible for acidifying a variety of intracellular compartments in eukaryotic cells.		Acetylation; Complete proteome; Hydrogen ion transport; Ion transport;Reference proteome; Transport.		GO:0005829;GO:0005765;GO:0005886;GO:0016471;GO:0008553	1.78	0.254	FALSE	0.236	0.915	FALSE
A0A0A6YX18	Atp6v1h	V-type proton ATPase subunit H		Subunit of the peripheral V1 complex of vacuolar ATPase. Subunit H activates the ATPase activity of the enzyme and couples ATPase activity to proton flow. Vacuolar ATPase is responsible for acidifying a variety of intracellular compartments in eukaryotic cells, thus providing most of the energy required for transport processes in the vacuolar system. Involved in the endocytosis mediated by clathr…		Complete proteome; Direct protein sequencing; Hydrogen ion transport;Ion transport; Phosphoprotein; Reference proteome; Transport.	V-ATPase_H_C; V-ATPase_H_N	GO:0000221;GO:0046961;GO:0006200;GO:0015991;GO:0006897	-0.181	0.801	FALSE	-0.00833	0.996	FALSE
Q61687	Atrx	Transcriptional regulator ATRX		Could be a global transcriptional regulator. Modifies gene expression by affecting chromatin.	Nucleus. Note=Associated with pericentromeric heterochromatin during interphase and mitosis, probably by interacting with HP1.	ATP-binding; Citrullination; Complete proteome; DNA damage;DNA repair; DNA-binding; Helicase; Hydrolase; Metal-binding;Nucleotide-binding; Nucleus; Phosphoprotein; Reference proteome; Zinc;Zinc-finger.	Helicase_C; SNF2_N	GO:0000792;GO:0000228;GO:0005524;GO:0003682;GO:0003677;GO:0004386;GO:0008270;GO:0006281;GO:0030900	-0.699	0.31	FALSE	-0.994	0.165	FALSE
Q3TKP3	Atxn10	Ataxin-10		Necessary for the survival of cerebellar neurons (By similarity). Induces neuritogenesis by activating the Ras-MAP kinase pathway (By similarity). May play a role in the maintenance of a critical intracellular glycosylation level and homeostasis (By similarity).	Cytoplasm, perinuclear region (By similarity).	Complete proteome; Cytoplasm; Direct protein sequencing;Phosphoprotein; Reference proteome.	Atx10homo_assoc	GO:0005829;GO:0030425;GO:0043025;GO:0048471;GO:0031175	-1.49	0.195	FALSE	-0.41	0.779	FALSE
F6U2C2	Atxn2	Ataxin-2				Complete proteome; Reference proteome.	LsmAD; PAM2	GO:0048471;GO:0021702;GO:0048872;GO:0040015;GO:0050905;GO:0048812	0.374	0.696	FALSE	-0.939	0.323	FALSE
A0A0U1RPL0	Atxn2l	Ataxin-2-like protein				Complete proteome; Reference proteome.	LsmAD; PAM2; SM-ATX	GO:0010494;GO:0016020;GO:0016607;GO:0010603;GO:0034063	0.23	0.73	FALSE	-0.303	0.669	FALSE
Q546X9	Atxn3	Ataxin-3				Complete proteome; Reference proteome.	Josephin; UIM	GO:0005759;GO:0031966;GO:0042405;GO:0008242;GO:0001012;GO:0004843;GO:0034605;GO:0035640;GO:0070932;GO:0016579;GO:0010810;GO:0006511	0.461	0.77	FALSE	2.65	0.0695	FALSE
O70126	Aurkb	Aurora kinase B		Serine/threonine-protein kinase component of the chromosomal passenger complex (CPC), a complex that acts as a key regulator of mitosis. The CPC complex has essential functions at the centromere in ensuring correct chromosome alignment and segregation and is required for chromatin-induced microtubule stabilization and spindle assembly. Involved in the bipolar attachment of spindle microtubules to…	Nucleus (By similarity). Chromosome (By similarity). Chromosome, centromere (By similarity). Cytoplasm, cytoskeleton, spindle (By similarity). Note=Localizes on chromosome arms and inner centromeres from prophase through metaphase and then transferring to the spindle midzone and midbody from anaphase through cytokinesis. Colocalized with gamma tubulin in the mid-body (By similarity). Proper local…	ATP-binding; Cell cycle; Cell division; Centromere; Chromosome;Complete proteome; Cytoplasm; Cytoskeleton; Kinase; Magnesium;Metal-binding; Mitosis; Nucleotide-binding; Nucleus; Phosphoprotein;Reference proteome; Serine/threonine-protein kinase; Transferase;Ubl conjugation.	Pkinase	GO:0010369;GO:0032133;GO:0000780;GO:0005737;GO:0000776;GO:0030496;GO:0097431;GO:0005634;GO:0005524;GO:0035174;GO:0046872;GO:0007568;GO:0008283;GO:0034644;GO:0036089;GO:0043988;GO:0002903;GO:0000122;GO:0032467;GO:0034501;GO:0051256	-0.154	0.872	FALSE	0.1	0.938	FALSE
Q496R6	Aven	Cell death regulator Aven				Complete proteome; Reference proteome.			-2.08	0.154	FALSE	-0.781	0.648	FALSE
Q0VEI6	Avil	Advillin				Complete proteome; Reference proteome.	Gelsolin	GO:0007015;GO:0060271	-0.615	0.543	FALSE	0.188	0.893	FALSE
P01887	B2m	Beta-2-microglobulin	Yes	Component of the class I major histocompatibility complex (MHC). Involved in the presentation of peptide antigens to the immune system.	Secreted.	3D-structure; Complete proteome; Direct protein sequencing;Disulfide bond; Immunity; Immunoglobulin domain; MHC I; Polymorphism;Reference proteome; Secreted; Signal.	C1-set	GO:0009897;GO:0005615;GO:0042612;GO:0030670;GO:0002481;GO:0002474;GO:0006968;GO:0006955;GO:0001916;GO:0042026;GO:0046686;GO:0042493;GO:0002237;GO:0033077	2.36	0.008	TRUE	1.58	0.0521	FALSE
Q3UN35	B4galnt1	Beta-1,4 N-acetylgalactosaminyltransferase 1	Yes	Involved in the biosynthesis of gangliosides GM2, GD2 and GA2.	Golgi apparatus membrane; Single-pass type II membrane protein.	Complete proteome; Disulfide bond; Glycoprotein; Glycosyltransferase;Golgi apparatus; Membrane; Reference proteome; Signal-anchor;Transferase; Transmembrane; Transmembrane helix.	Glycos_transf_2	GO:0030173;GO:0005886;GO:0003947;GO:0001574;GO:0030259;GO:0019915;GO:0006486;GO:0007283	0.0579	0.929	FALSE	-0.414	0.519	FALSE
Q3UI43	Babam1	BRISC and BRCA1-A complex member 1		Component of the BRCA1-A complex, a complex that specifically recognizes 'Lys-63'-linked ubiquitinated histones H2A and H2AX at DNA lesions sites, leading to target the BRCA1-BARD1 heterodimer to sites of DNA damage at double-strand breaks (DSBs). The BRCA1-A complex also possesses deubiquitinase activity that specifically removes 'Lys-63'-linked ubiquitin on histones H2A and H2AX. In the BRCA1-A…	Cytoplasm (By similarity). Nucleus (By similarity). Note=Localizes at sites of DNA damage at double- strand breaks (DSBs) (By similarity).	Acetylation; Chromatin regulator; Complete proteome; Cytoplasm;DNA damage; DNA repair; Nucleus; Phosphoprotein; Reference proteome.		GO:0070531;GO:0070552;GO:0005737;GO:0016568;GO:0006302;GO:0031572;GO:0045739;GO:0070536;GO:0010212	-0.35	0.803	FALSE	-1.37	0.299	FALSE
Q9CUY1	Bag1	BAG family molecular chaperone regulator 1				Complete proteome; Reference proteome.	BAG; ubiquitin	GO:0005829;GO:0005634;GO:2000672;GO:0001933;GO:0030182;GO:0043525;GO:0045944;GO:0070585	-0.149	0.808	FALSE	-0.0606	0.94	FALSE
A6H663	Bag3	BAG family molecular chaperone regulator 3		Inhibits the chaperone activity of HSP70/HSC70 by promoting substrate release. Has anti-apoptotic activity.		3D-structure; Acetylation; Apoptosis; Chaperone; Complete proteome;Phosphoprotein; Reference proteome; Repeat.	BAG; WW	GO:0005829;GO:0043005;GO:0005886;GO:0030018;GO:0032403;GO:0007420;GO:0071260;GO:0097192;GO:0008625;GO:0010664;GO:0050821;GO:0021510	-0.472	0.543	FALSE	0.148	0.889	FALSE
A6H6S8	Bag4	BAG family molecular chaperone regulator 4		Inhibits the chaperone activity of HSP70/HSC70 by promoting substrate release. Prevents constitutive TNFRSF1A signaling (By similarity).	Cytoplasm.	Chaperone; Complete proteome; Cytoplasm; Reference proteome.	BAG	GO:0005829;GO:0005634;GO:0005886;GO:0071364;GO:0071356;GO:0090367;GO:2001145;GO:0030838;GO:0045785;GO:0010763;GO:0033138;GO:0051897;GO:0051496;GO:0051291;GO:0072659;GO:0097178	0.481	0.612	FALSE	-0.0203	0.993	FALSE
Q8CI32	Bag5	BAG family molecular chaperone regulator 5		May function as a nucleotide exchange factor for HSP/HSP70, promoting ADP release, and activating Hsp70-mediated refolding. Inhibits both auto-ubiquitination of PARK2 and ubiquitination of target proteins by PARK2 (By similarity).		3D-structure; Chaperone; Complete proteome; Reference proteome;Repeat.	BAG	GO:0016234;GO:0048471;GO:0051087;GO:0061084;GO:0051444;GO:0070997;GO:0090083	-0.975	0.347	FALSE	-0.565	0.645	FALSE
Q3UF95	Bag6	Large proline-rich protein BAG6	Yes			Complete proteome; Reference proteome.	DUF3538; ubiquitin	GO:0005737	-0.558	0.501	FALSE	-0.00865	0.997	FALSE
O54962	Banf1	Barrier-to-autointegration factor;Barrier-to-autointegration factor, N-terminally processed		Plays fundamental roles in nuclear assembly, chromatin organization, gene expression and gonad development. May potently compress chromatin structure and be involved in membrane recruitment and chromatin decondensation during nuclear assembly. Contains 2 non-specific dsDNA-binding sites which may promote DNA cross-bridging (By similarity).	Nucleus (By similarity). Cytoplasm (By similarity). Chromosome (By similarity). Note=Significantly enriched at the nuclear inner membrane, diffusely throughout the nucleus during interphase and concentrated at the chromosomes during the M-phase. The phosphorylated form (by VRK1) shows a cytoplasmic localization (By similarity).	Acetylation; Chromosome; Complete proteome; Cytoplasm; DNA-binding;Nucleus; Phosphoprotein; Reference proteome.	BAF	GO:0005694;GO:0005737;GO:0005634;GO:0003677;GO:0015074;GO:0075713	0.958	0.13	FALSE	0.172	0.835	FALSE
Q91XV3	Basp1	Brain acid soluble protein 1			Cell membrane; Lipid-anchor. Cell projection, growth cone. Note=Associated with the membranes of growth cones that form the tips of elongating axons.	Cell membrane; Cell projection; Complete proteome;Direct protein sequencing; Lipoprotein; Membrane; Myristate;Phosphoprotein; Reference proteome.	BASP1	GO:0008180;GO:0005737;GO:0030426;GO:0016607;GO:0005886;GO:0003714;GO:0044212;GO:0072112;GO:0045892	2.54	0.0019	TRUE	-0.155	0.865	FALSE
A0A1B0GT81	Bax	Apoptosis regulator BAX		Accelerates programmed cell death by binding to, and antagonizing the apoptosis repressor BCL2 or its adenovirus homolog E1B 19k protein. Under stress conditions, undergoes a conformation change that causes translocation to the mitochondrion membrane, leading to the release of cytochrome c that then triggers apoptosis. Promotes activation of CASP3, and thereby apoptosis. BAX deficiency leads to l…	Isoform Gamma: Cytoplasm (By similarity).	3D-structure; Acetylation; Alternative splicing; Apoptosis;Complete proteome; Cytoplasm; Membrane; Mitochondrion;Mitochondrion outer membrane; Reference proteome; Transmembrane;Transmembrane helix.	Bcl-2	GO:0097144;GO:0005829;GO:0005789;GO:0005741;GO:0005757;GO:0005634;GO:0015267;GO:0008289;GO:0042803;GO:0006919;GO:0008635;GO:0097296;GO:0006309;GO:1902263;GO:1902262;GO:0001783;GO:0001782;GO:0002358;GO:0002352;GO:1990117;GO:0001974;GO:0071310;GO:0034644;GO:0021987;GO:0045136;GO:0035234;GO:0010248;GO:0097192;GO:0008625;GO:0009566;GO:0007281;GO:0006687;GO:0048873;GO:0021854;GO:0072332;GO:0008630;GO:…	-0.0758	0.9	FALSE	0.305	0.634	FALSE
Q9Z277	Baz1b	Tyrosine-protein kinase BAZ1B		Atypical tyrosine-protein kinase that plays a central role in chromatin remodeling and acts as a transcription regulator. Involved in DNA damage response by phosphorylating 'Tyr-142' of histone H2AX (H2AXY142ph). H2AXY142ph plays a central role in DNA repair and acts as a mark that distinguishes between apoptotic and repair responses to genotoxic stress. Essential component of the WICH complex, a…	Nucleus (By similarity). Note=Accumulates in pericentromeric heterochromatin during replication. Targeted to replication foci throughout S phase via its association with PCNA (By similarity).	Acetylation; Alternative splicing; ATP-binding; Bromodomain;Coiled coil; Complete proteome; DNA damage; Kinase; Metal-binding;Nucleotide-binding; Nucleus; Phosphoprotein; Reference proteome;Transcription; Transcription regulation; Transferase;Tyrosine-protein kinase; Zinc; Zinc-finger.	Bromodomain; PHD; WAC_Acf1_DNA_bd	GO:0005721;GO:0000793;GO:0043596;GO:0005634;GO:0071778;GO:0005524;GO:0003682;GO:0070577;GO:0035173;GO:0004715;GO:0004713;GO:0071884;GO:0008270;GO:0043044;GO:0006333;GO:0048096;GO:0034725;GO:0006302;GO:0003007;GO:0006351	-0.473	0.774	FALSE	-1.65	0.292	FALSE
Q83391	BC005685;BC057193			NA	NA	NA	NA	NA	-0.938	0.132	FALSE	-0.0849	0.925	FALSE
Q3U5M2	Bcas2	Pre-mRNA-splicing factor SPF27				Complete proteome; Reference proteome.	BCAS2	GO:0006397	-0.597	0.412	FALSE	-1.05	0.173	FALSE
Q3TJN1	Bcat1	Branched-chain-amino-acid aminotransferase;Branched-chain-amino-acid aminotransferase, cytosolic				Amino-acid biosynthesis; Aminotransferase;Branched-chain amino acid biosynthesis; Complete proteome;Pyridoxal phosphate; Reference proteome; Transferase.	Aminotran_4	GO:0005829;GO:0005739;GO:0004084;GO:0052656;GO:0052654;GO:0052655;GO:0009082;GO:0009083;GO:0034644;GO:0031571	-0.24	0.766	FALSE	0.394	0.64	FALSE
A0A1B0GX27	Bcat2	Branched-chain-amino-acid aminotransferase;Branched-chain-amino-acid aminotransferase, mitochondrial				Amino-acid biosynthesis; Aminotransferase;Branched-chain amino acid biosynthesis; Complete proteome;Pyridoxal phosphate; Reference proteome; Transferase.	Aminotran_4	GO:0005739;GO:0004084;GO:0052656;GO:0052654;GO:0052655;GO:0009082;GO:0006550;GO:0006551;GO:0010817;GO:0006573	0.718	0.223	FALSE	0.594	0.346	FALSE
Q9CWI3	Bccip	BRCA2 and CDKN1A-interacting protein		May promote cell cycle arrest by enhancing the inhibition of CDK2 activity by CDKN1A. May be required for repair of DNA damage by homologous recombination in conjunction with BRCA2. May not be involved in non-homologous end joining (NHEJ) (By similarity).	Nucleus. Note=Colocalizes with BRCA2 in discrete nuclear foci (By similarity).	Cell cycle; Complete proteome; DNA damage; DNA repair; Nucleus;Phosphoprotein; Reference proteome.	BCIP	GO:0019908;GO:0019207;GO:0007049;GO:0006281;GO:0061101;GO:0000079	-0.493	0.259	FALSE	0.216	0.681	FALSE
Q3TEG9	Bcl11b;Bcl11a	B-cell lymphoma/leukemia 11B				Complete proteome; Reference proteome.	zf-C2H2	GO:0005634;GO:0046872;GO:0003676;GO:0003714;GO:0030183;GO:0048671;GO:2000171;GO:0010629;GO:0048672;GO:0010976;GO:0030217	-0.943	0.357	FALSE	-1.19	0.277	FALSE
Q3UGC5	Bcl2l13	Bcl-2-like protein 13		May promote the activation of caspase-3 and apoptosis.	Mitochondrion membrane; Single-pass membrane protein (By similarity).	Apoptosis; Complete proteome; Membrane; Mitochondrion; Phosphoprotein;Reference proteome; Repeat; Transmembrane; Transmembrane helix.	Bcl-2	GO:0016021;GO:0031966;GO:0005739;GO:0006915;GO:0042981	-0.371	0.766	FALSE	-0.457	0.734	FALSE
A0A087WQA0	Bclaf1	Bcl-2-associated transcription factor 1				Complete proteome; Reference proteome.		GO:0005634;GO:0006915;GO:0045892;GO:2001022	-1.46	0.176	FALSE	-1.49	0.184	FALSE
Q3TBD4	Bicd2;Bicd1	Protein bicaudal D homolog 2;Protein bicaudal D homolog 1				Complete proteome; Reference proteome.	BicD	GO:0005794;GO:0007018;GO:0006810	0.028	0.982	FALSE	0.239	0.872	FALSE
P70444	Bid	BH3-interacting domain death agonist;BH3-interacting domain death agonist p15;BH3-interacting domain death agonist p13;BH3-interacting domain death agonist p11		Induces caspases and apoptosis. Counters the protective effect of Bcl-2. The major proteolytic product p15 BID allows the release of cytochrome c.	Cytoplasm. Mitochondrion membrane. Note=When uncleaved, it is predominantly cytoplasmic. p15 BID translocates to mitochondria as an integral membrane protein. p13 and p22 BID are associated with the mitochondrial membrane.	3D-structure; Acetylation; Apoptosis; Complete proteome; Cytoplasm;Membrane; Mitochondrion; Phosphoprotein; Reference proteome;Ubl conjugation.	BID	GO:0005829;GO:0032592;GO:0006919;GO:0007420;GO:0090150;GO:0097191;GO:0034349;GO:0043065;GO:2001238;GO:0032464;GO:0090200;GO:0051260;GO:0006626;GO:0042127;GO:2000045;GO:1902108;GO:0001836;GO:0032355;GO:0042770	1.12	0.412	FALSE	0.0183	0.996	FALSE
Q6P1B9	Bin1	Myc box-dependent-interacting protein 1				Complete proteome; Reference proteome.	BAR	GO:0005737;GO:0005634;GO:0042692;GO:0030100	1.3	0.23	FALSE	0.0449	0.982	FALSE
S4R270	Bin2	Bridging integrator 2				Complete proteome; Reference proteome.	BAR	GO:0005737;GO:0001891;GO:0002102;GO:0005543;GO:0060326;GO:0097320;GO:0006911;GO:0071800	-0.201	0.701	FALSE	-0.304	0.583	FALSE
S4R1L5	Birc6	Baculoviral IAP repeat-containing protein 6				Complete proteome; Reference proteome.	BIR; DUF3643; UQ_con	GO:0016020;GO:0004842;GO:0060711;GO:0043066;GO:0008284;GO:0060712	-0.695	0.154	FALSE	-0.649	0.204	FALSE
Q8R016	Blmh	Bleomycin hydrolase		The normal physiological role of BLM hydrolase is unknown, but it catalyzes the inactivation of the antitumor drug BLM (a glycopeptide) by hydrolyzing the carboxamide bond of its B- aminoalaninamide moiety thus protecting normal and malignant cells from BLM toxicity (By similarity).	Cytoplasm (By similarity).	Acetylation; Complete proteome; Cytoplasm; Hydrolase; Protease;Reference proteome; Thiol protease.	Peptidase_C1_2	GO:0005737;GO:0005634;GO:0004197;GO:0008233;GO:0006508;GO:0042493;GO:0009636	0.0231	0.959	FALSE	0.372	0.38	FALSE
Q9CY64	Blvra	Biliverdin reductase A		Reduces the gamma-methene bridge of the open tetrapyrrole, biliverdin IX alpha, to bilirubin with the concomitant oxidation of a NADH or NADPH cofactor (By similarity).	Cytoplasm (By similarity).	Acetylation; Complete proteome; Cytoplasm; Metal-binding; NAD; NADP;Oxidoreductase; Phosphoprotein; Reference proteome; Zinc.	Biliv-reduc_cat; GFO_IDH_MocA	GO:0005737;GO:0004074;GO:0000166;GO:0008270;GO:0042167	-0.983	0.366	FALSE	-0.794	0.523	FALSE
Q3U6G1	Blvrb	Flavin reductase (NADPH)	Yes			Complete proteome; Reference proteome.			-1.58	0.105	FALSE	-0.134	0.923	FALSE
Q3UYW7	Bms1					Complete proteome; Reference proteome.	AARP2CN; DUF663	GO:0005634;GO:0042254	-1.89	0.0426	TRUE	1.63	0.0777	FALSE
E9Q6J5-2	Bod1l					Complete proteome; Reference proteome.		GO:0003677	-0.539	0.323	FALSE	-0.446	0.455	FALSE
Q9D8S9	Bola1	BolA-like protein 1	Yes		Secreted. Note=Could be secreted via a non- classical export pathway (By similarity).	3D-structure; Complete proteome; Reference proteome; Secreted.	BolA	GO:0005576;GO:0005739	-0.707	0.657	FALSE	0.475	0.806	FALSE
Q8BGS2	Bola2	BolA-like protein 2				3D-structure; Acetylation; Alternative splicing; Complete proteome;Reference proteome.	BolA		1.02	0.359	FALSE	0.5	0.714	FALSE
Q3TJZ5	Bop1	Ribosome biogenesis protein BOP1		Component of the PeBoW complex, which is required for maturation of 28S and 5.8S ribosomal RNAs and formation of the 60S ribosome.	Nucleus, nucleolus. Nucleus, nucleoplasm.	Complete proteome; Nucleus; Phosphoprotein; Reference proteome;Repeat; Ribosome biogenesis; rRNA processing; WD repeat.	BOP1NT; WD40	GO:0005654;GO:0070545;GO:0030687;GO:0043021;GO:0008283;GO:0000448;GO:0051726	-0.362	0.706	FALSE	-1.87	0.0446	TRUE
Q3UBN8	Bpnt1	3(2),5-bisphosphate nucleotidase 1				Complete proteome; Reference proteome.	Inositol_P	GO:0008441;GO:0004441;GO:0000287;GO:0046854	-0.63	0.151	FALSE	-0.175	0.743	FALSE
E5D6T0	Bptf					Bromodomain; Complete proteome; Metal-binding; Reference proteome;Zinc; Zinc-finger.	Bromodomain; DDT; PHD	GO:0008270;GO:0009952;GO:0001892;GO:0007492	-0.334	0.627	FALSE	-0.734	0.299	FALSE
P46737	Brcc3	Lys-63-specific deubiquitinase BRCC36		Metalloprotease that specifically cleaves 'Lys-63'- linked polyubiquitin chains. Does not have activity toward 'Lys- 48'-linked polyubiquitin chains. Component of the BRCA1-A complex, a complex that specifically recognizes 'Lys-63'-linked ubiquitinated histones H2A and H2AX at DNA lesions sites, leading to target the BRCA1-BARD1 heterodimer to sites of DNA damage at double-strand breaks (DSBs). I…	Nucleus (By similarity). Note=Localizes at sites of DNA damage at double-strand breaks (DSBs) (By similarity).	Acetylation; Alternative splicing; Chromatin regulator;Complete proteome; DNA damage; DNA repair; Hydrolase; Metal-binding;Metalloprotease; Nucleus; Protease; Reference proteome;Ubl conjugation pathway; Zinc.	JAB	GO:0070531;GO:0070552;GO:0000152;GO:0030234;GO:0046872;GO:0008237;GO:0031593;GO:0004221;GO:0004843;GO:0006302;GO:0031572;GO:0070537;GO:0045739;GO:0006508;GO:0010212;GO:0010165	-1.63	0.325	FALSE	-0.177	0.945	FALSE
B2RS09	Brd2	Bromodomain-containing protein 2				Bromodomain; Complete proteome; Reference proteome.	Bromodomain	GO:0005737;GO:0005634;GO:0003682;GO:0006334;GO:0006357	-1.85	0.0883	FALSE	-2.05	0.0648	FALSE
Q8K3W0	Bre	BRCA1-A complex subunit BRE		Component of the BRCA1-A complex, a complex that specifically recognizes 'Lys-63'-linked ubiquitinated histones H2A and H2AX at DNA lesions sites, leading to target the BRCA1-BARD1 heterodimer to sites of DNA damage at double-strand breaks (DSBs). The BRCA1-A complex also possesses deubiquitinase activity that specifically removes 'Lys-63'-linked ubiquitin on histones H2A and H2AX. In the BRCA1-A…	Cytoplasm (By similarity). Nucleus (By similarity). Note=Localizes at sites of DNA damage at double- strand breaks (DSBs) (By similarity).	Acetylation; Alternative splicing; Apoptosis; Chromatin regulator;Complete proteome; Cytoplasm; DNA damage; DNA repair; Nucleus;Phosphoprotein; Reference proteome; Repeat.	BRE	GO:0070531;GO:0070552;GO:0005737;GO:0000152;GO:0031593;GO:0005164;GO:0006915;GO:0016568;GO:0006302;GO:0031572;GO:0045739;GO:0010212	0.051	0.912	FALSE	0.0841	0.888	FALSE
Q6NXM5	Brip1os;F630007L15Rik			NA	NA	NA	NA	NA	1.29	0.11	FALSE	1.31	0.114	FALSE
Q9DCA5	Brix1	Ribosome biogenesis protein BRX1 homolog		Required for biogenesis of the 60S ribosomal subunit (By similarity).	Nucleus, nucleolus (By similarity).	Acetylation; Complete proteome; Nucleus; Reference proteome;Ribosome biogenesis.	Brix	GO:0005730;GO:0042254	-1.13	0.467	FALSE	-0.759	0.68	FALSE
Q8K2Q7	Brox	BRO1 domain-containing protein BROX			Membrane; Lipid-anchor (Potential).	Alternative splicing; Complete proteome; Lipoprotein; Membrane;Methylation; Prenylation; Reference proteome.	BRO1	GO:0016020	-0.547	0.347	FALSE	0.0379	0.965	FALSE
K3W4Q8	Bsg	Basigin	Yes			Complete proteome; Reference proteome.	I-set	GO:0002080;GO:0045121;GO:0005739;GO:0042383;GO:0046697;GO:0007566;GO:0042475;GO:0051591;GO:0046689;GO:0043434	0.137	0.82	FALSE	0.104	0.889	FALSE
B7ZNZ1	Bspry	B box and SPRY domain-containing protein				Complete proteome; Reference proteome.	zf-B_box	GO:0005622;GO:0008270	-0.678	0.232	FALSE	-0.662	0.271	FALSE
E9QAE3	Btaf1					Complete proteome; Reference proteome.	DUF3535; Helicase_C; SNF2_N	GO:0005524;GO:0003677;GO:0004386;GO:0008152	-1.28	0.225	FALSE	0.52	0.678	FALSE
Q3UJR8	Btf3	Transcription factor BTF3		When associated with NACA, prevents inappropriate targeting of non-secretory polypeptides to the endoplasmic reticulum (ER). Binds to nascent polypeptide chains as they emerge from the ribosome and blocks their interaction with the signal recognition particle (SRP), which normally targets nascent secretory peptides to the ER. BTF3 is also a general transcription factor that can form a stable comp…	Cytoplasm (By similarity). Nucleus. Note=The heterodimer with NACA is cytoplasmic (By similarity).	Alternative splicing; Chaperone; Complete proteome; Cytoplasm;Nucleus; Phosphoprotein; Protein transport; Reference proteome;Transcription; Transcription regulation; Transport.	NAC	GO:0005634;GO:0001701;GO:0006355;GO:0006351	-0.203	0.785	FALSE	-0.0121	0.994	FALSE
A0A140LHA2	Bub3	Mitotic checkpoint protein BUB3		Has a dual function in spindle-assembly checkpoint signaling and in promoting the establishment of correct kinetochore-microtubule (K-MT) attachments. Promotes the formation of stable end-on bipolar attachments. Necessary for kinetochore localization of BUB1. The BUB1/BUB3 complex plays a role in the inhibition of anaphase-promoting complex or cyclosome (APC/C) when spindle-assembly checkpoint is…	Nucleus (By similarity). Chromosome, centromere, kinetochore. Note=Starts to localize at kinetochores in prometaphase I (Pro-MI) stage and maintains the localization until the metaphase I-anaphase I (MI-AI) transition (By similarity).	Acetylation; ADP-ribosylation; Cell cycle; Cell division; Centromere;Chromosome; Chromosome partition; Complete proteome; Isopeptide bond;Kinetochore; Meiosis; Mitosis; Nucleus; Phosphoprotein;Reference proteome; Repeat; Ubl conjugation; WD repeat.	WD40	GO:0000777;GO:0005634;GO:0008608;GO:0007126;GO:0000070;GO:0051983;GO:0071173	-0.314	0.32	FALSE	-0.418	0.206	FALSE
E0CX20	Bud31	Protein BUD31 homolog				Complete proteome; Reference proteome.	G10	GO:0005634	-2.36	0.000649	TRUE	-1.98	0.00221	TRUE
O54825	Bysl	Bystin		Required for processing of 20S pre-rRNA precursor and biogenesis of 40S ribosomal subunits.	Cytoplasm. Nucleus, nucleolus. Note=Associated with 40S ribosomal subunits.	Complete proteome; Cytoplasm; Nucleus; Phosphoprotein;Reference proteome; Ribosome biogenesis.	Bystin	GO:0045177;GO:0005737;GO:0005730;GO:0007155;GO:0008283;GO:0000462;GO:0001829	-0.348	0.748	FALSE	-0.603	0.588	FALSE
A0A087WQS2	Bzw1	Basic leucine zipper and W2 domain-containing protein 1		Enhances histone H4 gene transcription but does not seem to bind DNA directly (By similarity).		Acetylation; Activator; Complete proteome; Phosphoprotein;Reference proteome; Transcription; Transcription regulation.	W2	GO:0005737;GO:0006355;GO:0006351	-0.0499	0.909	FALSE	-0.654	0.109	FALSE
Q91VK1	Bzw2	Basic leucine zipper and W2 domain-containing protein 2		May be involved in neuronal differentiation (By similarity).		Acetylation; Complete proteome; Developmental protein;Differentiation; Neurogenesis; Phosphoprotein; Reference proteome.	W2	GO:0030154;GO:0007399	-0.769	0.117	FALSE	-0.309	0.582	FALSE
Q8R5L1	C1qbp	Complement component 1 Q subcomponent-binding protein, mitochondrial	Yes			Complete proteome; Reference proteome.	MAM33	GO:0009986;GO:0005829;GO:0005615;GO:0016020;GO:0005759;GO:0005739;GO:0005634;GO:0005540;GO:0003714;GO:0042256;GO:0050687;GO:0032689;GO:0032695;GO:0039534;GO:0048025;GO:0039536;GO:0000122;GO:0014065;GO:0043065;GO:2000510;GO:0090023;GO:0051897;GO:1900026;GO:1901165;GO:0030449	1.31	0.0309	TRUE	0.948	0.105	FALSE
Q06138	Cab39	Calcium-binding protein 39		Component of a complex that binds and activates STK11/LKB1. In the complex, required to stabilize the interaction between CAB39/MO25 (CAB39/MO25alpha or CAB39L/MO25beta) and STK11/LKB1 (By similarity).	Cytoplasm (Potential).	Complete proteome; Cytoplasm; Direct protein sequencing;Reference proteome.	Mo25	GO:0005737;GO:0043234;GO:0005509;GO:0030295;GO:0004674;GO:0032147;GO:0051291;GO:0006468	-1.95	0.247	FALSE	-0.342	0.887	FALSE
Q9DB16-2	Cab39l	Calcium-binding protein 39-like		Component of a complex that binds and activates STK11/LKB1. In the complex, required to stabilize the interaction between CAB39/MO25 (CAB39/MO25alpha or CAB39L/MO25beta) and STK11/LKB1 (By similarity).		Alternative splicing; Complete proteome; Reference proteome.	Mo25		-0.358	0.73	FALSE	-0.639	0.549	FALSE
Q9CXW3	Cacybp	Calcyclin-binding protein		May be involved in calcium-dependent ubiquitination and subsequent proteasomal degradation of target proteins. Probably serves as a molecular bridge in ubiquitin E3 complexes. Participates in the ubiquitin-mediated degradation of beta-catenin (CTNNB1) (By similarity).	Nucleus. Cytoplasm. Note=Cytoplasmic in unstimulated cultured neurons. Upon increase of calcium, it localizes to a ring around the nucleus. In neuroblastoma cells, after a Retinoic acid (RA) induction and calcium increase, it localizes in both the nucleus and cytoplasm. The nuclear and perinuclear fractions may be phosphorylated.	3D-structure; Acetylation; Complete proteome; Cytoplasm;Direct protein sequencing; Nucleus; Phosphoprotein;Reference proteome; Ubl conjugation pathway.	CS; SGS; Siah-Interact_N	GO:0030877;GO:0044297;GO:0043005;GO:0005641;GO:0007568;GO:0055007;GO:0071277;GO:0060548;GO:0045740;GO:0060416	-0.0312	0.948	FALSE	-0.247	0.619	FALSE
E9QAI5	Cad	CAD protein;Glutamine-dependent carbamoyl-phosphate synthase;Aspartate carbamoyltransferase;Dihydroorotase				Complete proteome; Reference proteome.	CPSase_L_chain; CPSase_L_D2; CPSase_L_D3; CPSase_sm_chain; GATase; MGS; OTCace; OTCace_N	GO:0016597;GO:0004070;GO:0005524;GO:0016812;GO:0046872;GO:0006207;GO:0070409;GO:0006543	-0.0497	0.942	FALSE	0.0874	0.922	FALSE
P62204	Calm1;Calml3	Calmodulin;Calmodulin-like protein 3		Calmodulin mediates the control of a large number of enzymes, ion channels, aquaporins and other proteins by Ca(2+). Among the enzymes to be stimulated by the calmodulin-Ca(2+) complex are a number of protein kinases and phosphatases. Together with CCP110 and centrin, is involved in a genetic pathway that regulates the centrosome cycle and progression through cytokinesis (By similarity).	Cytoplasm, cytoskeleton, spindle. Cytoplasm, cytoskeleton, spindle pole. Note=Distributed throughout the cell during interphase, but during mitosis becomes dramatically localized to the spindle poles and the spindle microtubules (By similarity).	3D-structure; Acetylation; Calcium; Complete proteome; Cytoplasm;Cytoskeleton; Direct protein sequencing; Isopeptide bond;Metal-binding; Methylation; Phosphoprotein; Reference proteome;Repeat; Ubl conjugation.	EF-hand_7	GO:0034704;GO:0005813;GO:0005829;GO:0030426;GO:0005634;GO:0005886;GO:0030017;GO:0005876;GO:0000922;GO:0005509;GO:0030235;GO:0072542;GO:0007190;GO:0019722;GO:0005513;GO:0051343;GO:0051000;GO:0032516;GO:0035307;GO:0060316;GO:0055117;GO:0032465;GO:0002027;GO:1901841;GO:0010880;GO:0001975;GO:0051412	0.933	0.468	FALSE	-0.414	0.8	FALSE
Q3UWP8	Calr	Calreticulin	Yes	Calcium-binding chaperone that promotes folding, oligomeric assembly and quality control in the endoplasmic reticulum (ER) via the calreticulin/calnexin cycle. This lectin interacts transiently with almost all of the monoglucosylated glycoproteins that are synthesized in the ER. Interacts with the DNA-binding domain of NR3C1 and mediates its nuclear export. Involved in maternal gene expression re…	Endoplasmic reticulum lumen. Cytoplasmic granule. Sarcoplasmic reticulum lumen (By similarity). Note=Associated with the lytic granules in the cytolytic T- lymphocytes.	3D-structure; Acetylation; Calcium; Chaperone; Complete proteome;Direct protein sequencing; Disulfide bond; Endoplasmic reticulum;Lectin; Metal-binding; Reference proteome; Repeat;Sarcoplasmic reticulum; Signal; Zinc.	Calreticulin	GO:0001669;GO:0005829;GO:0005788;GO:0009897;GO:0031012;GO:0005615;GO:0005794;GO:0042824;GO:0005634;GO:0048471;GO:0045335;GO:0005844;GO:0033018;GO:0005509;GO:0030246;GO:0042562;GO:0005506;GO:0003729;GO:0042277;GO:0055007;GO:0007050;GO:0071285;GO:0071310;GO:0090398;GO:0061077;GO:0030866;GO:0033144;GO:0045665;GO:0048387;GO:0000122;GO:0017148;GO:0002502;GO:0045787;GO:0008284;GO:2000510;GO:0045740;GO:…	1.67	0.00187	TRUE	1.2	0.0129	TRUE
Q3TUF3	Calu	Calumenin	Yes			Calcium; Complete proteome; Reference proteome.	EF-hand_7	GO:0005783;GO:0005509	1.74	0.0395	TRUE	0.781	0.361	FALSE
E9Q1T1	Camk2d;Camk2b;Camk2a	Calcium/calmodulin-dependent protein kinase type II subunit delta;Calcium/calmodulin-dependent protein kinase type II subunit beta;Calcium/calmodulin-dependent protein kinase type II subunit alpha				ATP-binding; Complete proteome; Kinase; Nucleotide-binding;Reference proteome; Serine/threonine-protein kinase; Transferase.	CaMKII_AD; Pkinase	GO:0043194;GO:0005737;GO:0014704;GO:0031594;GO:0043025;GO:0005634;GO:0030315;GO:0005524;GO:0004683;GO:0004674;GO:0006816;GO:0060048;GO:0000082;GO:0018105;GO:0046777;GO:0002028	-0.499	0.624	FALSE	-1.06	0.307	FALSE
Q8BGR3	Camk4	Calcium/calmodulin-dependent protein kinase type IV				ATP-binding; Complete proteome; Kinase; Nucleotide-binding;Reference proteome; Transferase.	Pkinase	GO:0005737;GO:0005730;GO:0005634;GO:0005524;GO:0004683;GO:0007616;GO:0043011;GO:0007270;GO:0006913;GO:0046827;GO:0045893;GO:0007165	0.0778	0.949	FALSE	0.168	0.915	FALSE
Q6ZQ38	Cand1	Cullin-associated NEDD8-dissociated protein 1		Key assembly factor of SCF (SKP1-CUL1-F-box protein) E3 ubiquitin ligase complexes that promotes the exchange of the substrate-recognition F-box subunit in SCF complexes, thereby playing a key role in the cellular repertoire of SCF complexes. Acts as a F-box protein exchange factor. The exchange activity of CAND1 is coupled with cycles of neddylation conjugation: in the deneddylated state, cullin…	Cytoplasm (By similarity). Nucleus (By similarity). Note=Predominantly cytoplasmic (By similarity).	Acetylation; Complete proteome; Cytoplasm; Nucleus; Phosphoprotein;Reference proteome; Repeat; Ubl conjugation pathway.	TIP120	GO:0031461;GO:0005737;GO:0005634;GO:0030154;GO:0043086;GO:0045899;GO:0045893;GO:0016567;GO:0010265	-0.82	0.235	FALSE	-0.339	0.681	FALSE
Q6ZQ73	Cand2	Cullin-associated NEDD8-dissociated protein 2		Probable assembly factor of SCF (SKP1-CUL1-F-box protein) E3 ubiquitin ligase complexes that promotes the exchange of the substrate-recognition F-box subunit in SCF complexes, thereby playing a key role in the cellular repertoire of SCF complexes (By similarity).	Nucleus (By similarity).	Acetylation; Complete proteome; Nucleus; Reference proteome; Repeat;Ubl conjugation; Ubl conjugation pathway.	TIP120	GO:0005634;GO:0017025	-0.151	0.835	FALSE	0.266	0.731	FALSE
Q5SUC3	Canx	Calnexin	Yes	Calcium-binding protein that interacts with newly synthesized glycoproteins in the endoplasmic reticulum. It may act in assisting protein assembly and/or in the retention within the ER of unassembled protein subunits. It seems to play a major role in the quality control apparatus of the ER by the retention of incorrectly folded proteins. Associated with partial T-cell antigen receptor complexes t…	Endoplasmic reticulum membrane; Single-pass type I membrane protein. Endoplasmic reticulum (By similarity). Melanosome (By similarity). Note=The palmitoylated form preferentially localizes to the perinuclear rough ER (By similarity). When bound to CD3 epsilon chains, calnexin's ER retention signal can be masked, permitting it to escape ER retention.	Acetylation; Calcium; Chaperone; Complete proteome; Disulfide bond;Endoplasmic reticulum; Lectin; Lipoprotein; Membrane; Metal-binding;Palmitate; Phosphoprotein; Reference proteome; Repeat; Signal;Transmembrane; Transmembrane helix.	Calreticulin	GO:0030424;GO:0032839;GO:0043197;GO:0071556;GO:0042470;GO:0043025;GO:0043234;GO:0005840;GO:0005509;GO:0007568;GO:0061077;GO:0072583;GO:0048488	0.54	0.671	FALSE	-1.18	0.359	FALSE
Q3UVJ2	Cap1	Adenylyl cyclase-associated protein;Adenylyl cyclase-associated protein 1		Directly regulates filament dynamics and has been implicated in a number of complex developmental and morphological processes, including mRNA localization and the establishment of cell polarity (By similarity).	Cell membrane; Peripheral membrane protein (By similarity).	Acetylation; Actin-binding; Cell membrane; Complete proteome;Direct protein sequencing; Membrane; Phosphoprotein;Reference proteome.	CAP_C; CAP_N	GO:0030864;GO:0005829;GO:0005576;GO:0005886;GO:0030036;GO:0001667;GO:0000902;GO:0006898	0.0741	0.869	FALSE	-0.348	0.424	FALSE
Q3UJ44	Capg	Macrophage-capping protein	Yes			Complete proteome; Reference proteome.	Gelsolin	GO:0005737;GO:0031965;GO:0005730;GO:0030031	1.11	0.102	FALSE	-0.376	0.634	FALSE
Q3TB79	Capn1	Calpain-1 catalytic subunit		Calcium-regulated non-lysosomal thiol-protease which catalyze limited proteolysis of substrates involved in cytoskeletal remodeling and signal transduction.	Cytoplasm (By similarity). Cell membrane (By similarity). Note=Translocates to the plasma membrane upon Ca(2+) binding (By similarity).	Autocatalytic cleavage; Calcium; Cell membrane; Complete proteome;Cytoplasm; Hydrolase; Membrane; Metal-binding; Protease;Reference proteome; Repeat; Thiol protease.	Calpain_III; Peptidase_C2	GO:0005737;GO:0005886;GO:0005509;GO:0004198;GO:0006508;GO:0032801	-0.466	0.335	FALSE	-0.676	0.181	FALSE
O08529	Capn2	Calpain-2 catalytic subunit		Calcium-regulated non-lysosomal thiol-protease which catalyze limited proteolysis of substrates involved in cytoskeletal remodeling and signal transduction (By similarity).	Cytoplasm (By similarity). Cell membrane (By similarity). Note=Translocates to the plasma membrane upon Ca(2+) binding (By similarity).	Acetylation; Calcium; Cell membrane; Complete proteome; Cytoplasm;Hydrolase; Membrane; Metal-binding; Protease; Reference proteome;Repeat; Thiol protease.	Calpain_III; Peptidase_C2	GO:0000785;GO:0005829;GO:0005634;GO:0005886;GO:0005509;GO:0004198;GO:0001824;GO:0071230;GO:0007520;GO:0016540;GO:0006508;GO:0001666	0.699	0.458	FALSE	-0.789	0.439	FALSE
A0A0R4IZW8	Capns1;Capns2	Calpain small subunit 1;Calpain small subunit 2		Regulatory subunit of the calcium-regulated non- lysosomal thiol-protease which catalyzes limited proteolysis of substrates involved in cytoskeletal remodeling and signal transduction.	Cytoplasm (By similarity). Cell membrane (By similarity). Note=Translocates to the plasma membrane upon calcium binding (By similarity).	Acetylation; Calcium; Cell membrane; Complete proteome; Cytoplasm;Membrane; Metal-binding; Reference proteome; Repeat.	EF-hand_6	GO:0005737;GO:0005886;GO:0005509;GO:0004198	-0.44	0.8	FALSE	-0.904	0.604	FALSE
Q60865	Caprin1;rng105	Caprin-1		May regulate the transport and translation of mRNAs of proteins involved in synaptic plasticity in neurons and cell proliferation and migration in multiple cell types.	Cytoplasm, cytosol. Cell projection, dendrite. Note=Associated with RNA granules (By similarity).	Acetylation; Cell projection; Coiled coil; Complete proteome;Cytoplasm; Differentiation; Glycoprotein; Phosphoprotein;Protein synthesis inhibitor; Reference proteome; RNA-binding.	Caprin-1_C	GO:0000932;GO:0010494;GO:0005829;GO:0030425;GO:0003723;GO:0017148;GO:0050775;GO:0061003	-0.211	0.663	FALSE	-0.975	0.0433	FALSE
Q5RKN9	Capza1	F-actin-capping protein subunit alpha-1				Actin-binding; Complete proteome; Reference proteome.	F-actin_cap_A	GO:0030863;GO:0008290;GO:0016020;GO:0071203;GO:0030036;GO:0051016	-0.253	0.515	FALSE	-0.175	0.707	FALSE
Q5DQJ3	Capza2	F-actin-capping protein subunit alpha-2				Complete proteome; Reference proteome.	F-actin_cap_A	GO:0030863;GO:0008290;GO:0016020;GO:0071203;GO:0030036	-0.0413	0.973	FALSE	-0.291	0.833	FALSE
Q923G3	Capzb	F-actin-capping protein subunit beta				Complete proteome; Reference proteome.	F_actin_cap_B	GO:0030863;GO:0008290;GO:0014704;GO:0030027;GO:0016020;GO:0071203;GO:0030018;GO:0030036;GO:0051016;GO:0030032;GO:0048747;GO:0031115;GO:0031175;GO:0090036	-0.0144	0.975	FALSE	-0.073	0.896	FALSE
Q923G3	Capzb	F-actin-capping protein subunit beta				Complete proteome; Reference proteome.	F_actin_cap_B	GO:0030863;GO:0008290;GO:0014704;GO:0030027;GO:0016020;GO:0071203;GO:0030018;GO:0030036;GO:0051016;GO:0030032;GO:0048747;GO:0031115;GO:0031175;GO:0090036	-0.0144	0.975	FALSE	-0.073	0.896	FALSE
Q5M9P7	Carhsp1	Calcium-regulated heat stable protein 1		Binds mRNA and regulates the stability of target mRNA.	Cytoplasm. Cytoplasm, P-body. Cytoplasmic granule. Note=Detected at cytoplasmic stress granules and P- bodies. Detected at exosome granules where mRNA is degraded.	Acetylation; Complete proteome; Cytoplasm; Phosphoprotein;Reference proteome; RNA-binding.	CSD	GO:0000932;GO:0005829;GO:0043186;GO:0003677;GO:0003730;GO:0043488;GO:0006355	1.98	0.216	FALSE	0.107	0.964	FALSE
Q9CZ42-2	Carkd	ATP-dependent (S)-NAD(P)H-hydrate dehydratase				Complete proteome; Reference proteome.	Carb_kinase	GO:0005739	-0.0466	0.942	FALSE	0.243	0.727	FALSE
D3YUP1	Carm1	Histone-arginine methyltransferase CARM1	Yes			Complete proteome; Methyltransferase; Reference proteome;S-adenosyl-L-methionine; Transferase.	CARM1; PRMT5	GO:0008276;GO:0003713;GO:0060350;GO:0016571;GO:0030520;GO:0032091;GO:0009405;GO:0008284;GO:0003420;GO:0006355	0.241	0.704	FALSE	0.421	0.517	FALSE
Q9ER72	Cars	Cysteine--tRNA ligase, cytoplasmic			Cytoplasm.	Acetylation; Alternative splicing; Aminoacyl-tRNA synthetase;ATP-binding; Complete proteome; Cytoplasm; Ligase; Metal-binding;Nucleotide-binding; Phosphoprotein; Protein biosynthesis;Reference proteome; Zinc.	tRNA-synt_1e	GO:0005829;GO:0005524;GO:0004817;GO:0046872;GO:0000049;GO:0006423	-0.57	0.107	FALSE	-0.45	0.214	FALSE
P29452	Casp1	Caspase-1;Caspase-1 subunit p20;Caspase-1 subunit p10		Thiol protease that cleaves IL-1 beta between an Asp and an Ala, releasing the mature cytokine which is involved in a variety of inflammatory processes. Important for defense against pathogens. Cleaves and activates sterol regulatory element binding proteins (SREBPs). Can also promote apoptosis.	Cytoplasm.	Apoptosis; Complete proteome; Cytoplasm; Hydrolase; Protease;Reference proteome; Thiol protease; Zymogen.	CARD; Peptidase_C14	GO:0097169;GO:0005829;GO:0005576;GO:0072557;GO:0072558;GO:0072559;GO:0004197;GO:0008233;GO:0006915;GO:0071260;GO:0071310;GO:0032611;GO:0060081;GO:0051882;GO:0043123;GO:0050717;GO:0050718;GO:0016485;GO:0006508;GO:0070269;GO:0042981;GO:0050727;GO:0033198;GO:0001666;GO:0032496	-2.06	0.263	FALSE	-1.49	0.467	FALSE
D6RFN6	Casp2	Caspase;Caspase-2;Caspase-2 subunit p18;Caspase-2 subunit p13;Caspase-2 subunit p12				Complete proteome; Reference proteome.	CARD; Peptidase_C14	GO:0005737;GO:0005634;GO:0097153;GO:0035234;GO:0097192;GO:0043066;GO:0043065;GO:2001235;GO:0006508	-0.919	0.247	FALSE	-0.859	0.314	FALSE
P70677	Casp3	Caspase-3;Caspase-3 subunit p17;Caspase-3 subunit p12		Involved in the activation cascade of caspases responsible for apoptosis execution. At the onset of apoptosis it proteolytically cleaves poly(ADP-ribose) polymerase (PARP) at a '216-Asp-|-Gly-217' bond. Cleaves and activates sterol regulatory element binding proteins (SREBPs) between the basic helix-loop- helix leucine zipper domain and the membrane attachment domain. Cleaves and activates caspas…	Cytoplasm.	Acetylation; Apoptosis; Complete proteome; Cytoplasm; Hydrolase;Phosphoprotein; Protease; Reference proteome; S-nitrosylation;Thiol protease; Zymogen.	Peptidase_C14	GO:0005829;GO:0005739;GO:0005634;GO:0004190;GO:0004861;GO:0097200;GO:0006309;GO:0001782;GO:0045165;GO:0006974;GO:0071310;GO:0097192;GO:0008625;GO:0034349;GO:0007507;GO:0008631;GO:0030216;GO:0046007;GO:0043066;GO:0030889;GO:0045736;GO:0051402;GO:0030264;GO:0043525;GO:0016485;GO:0006508;GO:0001836;GO:0009411;GO:0009611;GO:0007605;GO:0043029	0.571	0.237	FALSE	0.253	0.655	FALSE
Q4FK85	Casp8	Caspase-8;Caspase-8 subunit p18;Caspase-8 subunit p10		Most upstream protease of the activation cascade of caspases responsible for the TNFRSF6/FAS mediated and TNFRSF1A induced cell death. Binding to the adapter molecule FADD recruits it to either receptor. The resulting aggregate called death- inducing signaling complex (DISC) performs CASP8 proteolytic activation. The active dimeric enzyme is then liberated from the DISC and free to activate downs…		Acetylation; Apoptosis; Complete proteome; Hydrolase; Phosphoprotein;Protease; Reference proteome; Repeat; Thiol protease; Zymogen.	DED; Peptidase_C14	GO:0031265;GO:0044297;GO:0005813;GO:0005829;GO:0045121;GO:0005739;GO:0043005;GO:0030690;GO:0097342;GO:0097153;GO:0006919;GO:0001525;GO:0048738;GO:0071260;GO:0071407;GO:0097194;GO:0008625;GO:0097284;GO:0030225;GO:0043124;GO:0060546;GO:0001841;GO:2001238;GO:0043123;GO:0045651;GO:0045862;GO:0051291;GO:0051603;GO:0070243;GO:0046677;GO:0032025;GO:0009409;GO:0032355;GO:0045471;GO:0032496;GO:0034612	0.0526	0.921	FALSE	-0.0918	0.89	FALSE
P51125-2	Cast	Calpastatin		Specific inhibition of calpain (calcium-dependent cysteine protease). Plays a key role in postmortem tenderization of meat and have been proposed to be involved in muscle protein degradation in living tissue.		Acetylation; Alternative splicing; Complete proteome; Phosphoprotein;Protease inhibitor; Reference proteome; Repeat;Thiol protease inhibitor.	Calpain_inhib	GO:0016020;GO:0004869;GO:0010951;GO:0030163	1.22	0.0491	TRUE	0.474	0.473	FALSE
P24270	Cat	Catalase		Occurs in almost all aerobically respiring organisms and serves to protect cells from the toxic effects of hydrogen peroxide. Promotes growth of cells.	Peroxisome.	Acetylation; Complete proteome; Direct protein sequencing; Heme;Hydrogen peroxide; Iron; Metal-binding; Mitogen; NADP; Oxidoreductase;Peroxidase; Peroxisome; Phosphoprotein; Reference proteome.	Catalase; Catalase-rel	GO:0005829;GO:0005783;GO:0005794;GO:0005764;GO:0005758;GO:0005739;GO:0005778;GO:0005886;GO:0004046;GO:0004096;GO:0020037;GO:0046872;GO:0050661;GO:0009060;GO:0071363;GO:0008203;GO:0020027;GO:0042744;GO:0001822;GO:0042697;GO:0043066;GO:0032088;GO:0051781;GO:0051092;GO:0014068;GO:0051289;GO:0055093;GO:0001666;GO:0033197;GO:0006641;GO:0001657;GO:0009650	0.79	0.115	FALSE	0.608	0.244	FALSE
Q08024	Cbfb	Core-binding factor subunit beta		CBF binds to the core site, 5'-PYGPYGGT-3', of a number of enhancers and promoters, including murine leukemia virus, polyomavirus enhancer, T-cell receptor enhancers, LCK, IL3 and GM- CSF promoters. CBFB enhances DNA binding by RUNX1.	Nucleus (Potential).	3D-structure; Alternative splicing; Complete proteome;Direct protein sequencing; Nucleus; Phosphoprotein;Reference proteome.	CBF_beta	GO:0005634;GO:0003677;GO:0003713;GO:0048469;GO:0060216;GO:0030098;GO:0030099;GO:0001649;GO:0045944	0.108	0.827	FALSE	0.382	0.414	FALSE
Q08024	Cbfb	Core-binding factor subunit beta		CBF binds to the core site, 5'-PYGPYGGT-3', of a number of enhancers and promoters, including murine leukemia virus, polyomavirus enhancer, T-cell receptor enhancers, LCK, IL3 and GM- CSF promoters. CBFB enhances DNA binding by RUNX1.	Nucleus (Potential).	3D-structure; Alternative splicing; Complete proteome;Direct protein sequencing; Nucleus; Phosphoprotein;Reference proteome.	CBF_beta	GO:0005634;GO:0003677;GO:0003713;GO:0048469;GO:0060216;GO:0030098;GO:0030099;GO:0001649;GO:0045944	0.108	0.827	FALSE	0.382	0.414	FALSE
A0A0U1RQ85	Cbl	E3 ubiquitin-protein ligase CBL		Adapter protein that functions as a negative regulator of many signaling pathways that are triggered by activation of cell surface receptors. Acts as an E3 ubiquitin-protein ligase, which accepts ubiquitin from specific E2 ubiquitin-conjugating enzymes, and then transfers it to substrates promoting their degradation by the proteasome. Recognizes activated receptor tyrosine kinases, including KIT,…	Cytoplasm. Cell membrane (By similarity). Note=Colocalizes with FGFR2 in lipid rafts at the cell membrane (By similarity).	3D-structure; Acetylation; Calcium; Cell membrane; Complete proteome;Cytoplasm; Ligase; Membrane; Metal-binding; Phosphoprotein;Polymorphism; Proto-oncogene; Reference proteome; Repeat;Ubl conjugation; Ubl conjugation pathway; Zinc; Zinc-finger.	Cbl_N; Cbl_N2; Cbl_N3; UBA	GO:0005737;GO:0005634;GO:0005886;GO:0005509;GO:0004871;GO:0004842;GO:0008270;GO:0045453;GO:0007166;GO:0043066;GO:0014068;GO:0006468	-1.01	0.073	FALSE	-0.919	0.105	FALSE
B9EKI5	Cblb	E3 ubiquitin-protein ligase CBL-B				Complete proteome; Metal-binding; Reference proteome; Zinc;Zinc-finger.	Cbl_N; Cbl_N2; Cbl_N3; UBA	GO:0005737;GO:0005634;GO:0005509;GO:0004871;GO:0004842;GO:0008270;GO:0007166;GO:0006955;GO:0035556;GO:0046642;GO:0050860;GO:0045732;GO:0002669;GO:0016567;GO:0042110	0.956	0.433	FALSE	-0.665	0.644	FALSE
B2RXY7	Cbr1	Carbonyl reductase [NADPH] 1		NADPH-dependent reductase with broad substrate specificity. Catalyzes the reduction of a wide variety of carbonyl compounds including quinones, prostaglandins, menadione, plus various xenobiotics. Catalyzes the reduction of the antitumor anthracyclines doxorubicin and daunorubicin to the cardiotoxic compounds doxorubicinol and daunorubicinol. Can convert prostaglandin E2 to prostaglandin F2-alpha…	Cytoplasm.	Acetylation; Complete proteome; Cytoplasm; Direct protein sequencing;NADP; Oxidoreductase; Reference proteome.	adh_short	GO:0005737;GO:0047021;GO:0004090;GO:0050221;GO:0017144;GO:0042373	1.18	0.141	FALSE	-0.17	0.879	FALSE
P83917	Cbx1	Chromobox protein homolog 1		Component of heterochromatin. Recognizes and binds histone H3 tails methylated at 'Lys-9', leading to epigenetic repression. Interaction with lamin B receptor (LBR) can contribute to the association of the heterochromatin with the inner nuclear membrane.	Nucleus (By similarity). Note=Unassociated with chromosomes during mitosis (By similarity).	3D-structure; Complete proteome; Nucleus; Phosphoprotein;Reference proteome; Repeat; Ubl conjugation.	Chromo; Chromo_shadow	GO:0005721;GO:0010369;GO:0001939;GO:0001940;GO:0005819;GO:0045892	0.317	0.645	FALSE	0.624	0.371	FALSE
Q9DCC5	Cbx3	Chromobox protein homolog 3				Complete proteome; Nucleus; Reference proteome.	Chromo; Chromo_shadow	GO:0005634	0.178	0.74	FALSE	0.169	0.781	FALSE
Q61686	Cbx5	Chromobox protein homolog 5		Component of heterochromatin that recognizes and binds histone H3 tails methylated at 'Lys-9' (H3K9me), leading to epigenetic repression. In contrast, it is excluded from chromatin when 'Tyr-41' of histone H3 is phosphorylated (H3Y41ph). Can interact with lamin-B receptor (LBR). This interaction can contribute to the association of the heterochromatin with the inner nuclear membrane. Involved in …	Nucleus. Chromosome. Chromosome, centromere. Note=Component of centromeric and pericentromeric heterochromatin. Associates with chromosomes during mitosis. Associates specifically with chromatin during metaphase and anaphase.	Centromere; Chromosome; Complete proteome; Nucleus; Phosphoprotein;Reference proteome; Repeat; Ubl conjugation.	Chromo; Chromo_shadow	GO:0010369;GO:0005737;GO:0000118;GO:0035097;GO:0000776;GO:0005720;GO:0005730;GO:0016605;GO:0017053;GO:0003682;GO:0035064;GO:0045892	-0.171	0.803	FALSE	-0.215	0.771	FALSE
F6XC25	Cc2d1b	Coiled-coil and C2 domain-containing protein 1B				Complete proteome; Reference proteome.	C2	GO:0000978;GO:0001078	-1.14	0.281	FALSE	-1.5	0.179	FALSE
Q8CH18-3	Ccar1	Cell division cycle and apoptosis regulator protein 1		Associates with components of the Mediator and p160 coactivator complexes that play a role as intermediaries transducing regulatory signals from upstream transcriptional activator proteins to basal transcription machinery at the core promoter. Recruited to endogenous nuclear receptor target genes in response to the appropriate hormone. Also functions as a p53 coactivator. May thus play an importa…	Cytoplasm, perinuclear region (By similarity).	Alternative splicing; Apoptosis; Cell cycle; Coiled coil;Complete proteome; Cytoplasm; Isopeptide bond; Phosphoprotein;Reference proteome; Transcription; Transcription regulation;Ubl conjugation.	DBC1; S1-like; SAP	GO:0048471;GO:0030374;GO:0003676;GO:0006915;GO:0007049;GO:0006355;GO:0006351	-0.693	0.69	FALSE	-1.58	0.359	FALSE
Q8VDP4	Ccar2	Cell cycle and apoptosis regulator protein 2		Core component of the DBIRD complex, a multiprotein complex that acts at the interface between core mRNP particles and RNA polymerase II (RNAPII) and integrates transcript elongation with the regulation of alternative splicing: the DBIRD complex affects local transcript elongation rates and alternative splicing of a large set of exons embedded in (A + T)-rich DNA regions. Inhibits SIRT1 deacetyla…	Nucleus (By similarity). Note=Recruited to chromatin, post-UV irradiation (By similarity).	Acetylation; Apoptosis; Cell cycle; Coiled coil; Complete proteome;Direct protein sequencing; DNA damage; Metalloenzyme inhibitor;mRNA processing; mRNA splicing; Nucleus; Phosphoprotein;Reference proteome.	DBC1; S1-like	GO:0044609;GO:0005759;GO:0000790;GO:0005681;GO:0004857;GO:0000993;GO:0007049;GO:0006974;GO:0043653;GO:0006397;GO:1902230;GO:0043065;GO:2000003;GO:0032784;GO:0009411;GO:0008380	-1.02	0.259	FALSE	-0.552	0.597	FALSE
Q71RI9-2	Ccbl2	Kynurenine--oxoglutarate transaminase 3				Complete proteome; Reference proteome.		GO:0005739	0.0814	0.948	FALSE	0.0754	0.963	FALSE
A0A0G2JF16	Ccdc12	Coiled-coil domain-containing protein 12				Acetylation; Coiled coil; Complete proteome; Phosphoprotein;Reference proteome.	cwf18		1.13	0.256	FALSE	0.483	0.686	FALSE
Q9D8X2	Ccdc124	Coiled-coil domain-containing protein 124		Required for proper progression of late cytokinetic stages (By similarity).	Cytoplasm, cytoskeleton, microtubule organizing center, centrosome (By similarity). Midbody (By similarity). Note=Colocalizes with gamma-tubulin at interphase, prophase, metaphase, and anaphase. Relocates from centrosome to midbody at telophase (By similarity).	Cell cycle; Cell division; Coiled coil; Complete proteome; Cytoplasm;Cytoskeleton; Phosphoprotein; Reference proteome.	DUF1014	GO:0005737;GO:0005815;GO:0030496;GO:0007049;GO:0051301	1.03	0.299	FALSE	-2.59	0.019	TRUE
Q9JIG7	Ccdc22	Coiled-coil domain-containing protein 22				Coiled coil; Complete proteome; Phosphoprotein; Reference proteome.	DUF812		-0.107	0.923	FALSE	0.308	0.81	FALSE
Q8R3Q6	Ccdc58	Coiled-coil domain-containing protein 58				Acetylation; Coiled coil; Complete proteome; Reference proteome.	Cid2	GO:0005739	1.06	0.332	FALSE	1.08	0.359	FALSE
D3YZP9	Ccdc6	Coiled-coil domain-containing protein 6			Cytoplasm (By similarity). Cytoplasm, cytoskeleton (By similarity). Note=May be a cytoskeletal protein (By similarity).	Acetylation; Chromosomal rearrangement; Coiled coil;Complete proteome; Cytoplasm; Cytoskeleton; Phosphoprotein;Reference proteome; Repeat; SH3-binding.	DUF2046	GO:0005737;GO:0005856	0.185	0.828	FALSE	-0.516	0.547	FALSE
Q3TCJ8-2	Ccdc69	Coiled-coil domain-containing protein 69				Alternative splicing; Coiled coil; Complete proteome; Lipoprotein;Myristate; Reference proteome.			1.42	0.0518	FALSE	-0.00136	0.999	FALSE
B2RXR1	Ccdc88b	Coiled-coil domain-containing protein 88B	Yes			Alternative splicing; Coiled coil; Complete proteome; Phosphoprotein;Reference proteome.	HOOK		-0.61	0.433	FALSE	-0.409	0.655	FALSE
Q8VC31	Ccdc9	Coiled-coil domain-containing protein 9				Coiled coil; Complete proteome; Phosphoprotein; Reference proteome.			0.285	0.766	FALSE	-0.343	0.741	FALSE
Q0VB35	Ccl1	C-C motif chemokine;C-C motif chemokine 1	Yes	Cytokine that is chemotactic for neutrophils.		Alternative splicing; Chemotaxis; Complete proteome; Cytokine;Disulfide bond; Glycoprotein; Polymorphism; Reference proteome;Signal.	IL8	GO:0005615;GO:0005125;GO:0060326;GO:0006955	-1.41	0.15	FALSE	-4.24	0.000948	TRUE
Q3U6F9	Ccl3	C-C motif chemokine;C-C motif chemokine 3	Yes	Monokine with inflammatory, pyrogenic and chemokinetic properties. Has a potent chemotactic activity for eosinophils. Binding to a high-affinity receptor activates calcium release in neutrophils.	Secreted.	Chemotaxis; Complete proteome; Cytokine; Direct protein sequencing;Disulfide bond; Inflammatory response; Reference proteome; Secreted;Signal.	IL8	GO:0005829;GO:0005615;GO:0004698;GO:0042056;GO:0008009;GO:0016004;GO:0043615;GO:0007610;GO:0019722;GO:0007267;GO:0071407;GO:0007010;GO:0048245;GO:0043308;GO:0006954;GO:0031663;GO:0048246;GO:0000165;GO:0002548;GO:0043922;GO:0010629;GO:0045671;GO:0030593;GO:0001649;GO:0051928;GO:0050850;GO:0070374;GO:0050729;GO:0050718;GO:2000503;GO:0043525;GO:0045672;GO:0045944;GO:0032760;GO:0043491;GO:0008360;GO:…	-0.759	0.64	FALSE	-1.44	0.386	FALSE
Q5QNV9	Ccl4	C-C motif chemokine;C-C motif chemokine 4	Yes	Monokine with inflammatory and chemokinetic properties.	Secreted.	Chemotaxis; Complete proteome; Cytokine; Disulfide bond;Inflammatory response; Reference proteome; Secreted; Signal.	IL8	GO:0005615;GO:0060326;GO:0006955;GO:0006954	-0.99	0.669	FALSE	-1.75	0.467	FALSE
Q3U3M5	Ccnk	Cyclin-K				Complete proteome; Cyclin; Reference proteome.	Cyclin_N	GO:0002944;GO:0002945;GO:0004693;GO:0008353;GO:0006974;GO:0001701;GO:0071157;GO:0000079;GO:0006355	-0.0346	0.981	FALSE	-0.723	0.604	FALSE
Q542X7	Cct2	T-complex protein 1 subunit beta		Molecular chaperone; assists the folding of proteins upon ATP hydrolysis. As part of the BBS/CCT complex may play a role in the assembly of BBSome, a complex involved in ciliogenesis regulating transports vesicles to the cilia. Known to play a role, in vitro, in the folding of actin and tubulin (By similarity).	Cytoplasm.	Acetylation; ATP-binding; Chaperone; Complete proteome; Cytoplasm;Direct protein sequencing; Nucleotide-binding; Phosphoprotein;Reference proteome.	Cpn60_TCP1	GO:0044297;GO:0005832;GO:0005874;GO:0005634;GO:0002199;GO:0005524;GO:0007339;GO:0051131;GO:0006457	-0.0866	0.881	FALSE	-0.459	0.419	FALSE
Q3U4U6	Cct3;Cctg	T-complex protein 1 subunit gamma				ATP-binding; Chaperone; Complete proteome; Cytoplasm;Nucleotide-binding; Reference proteome.	Cpn60_TCP1	GO:0044297;GO:0005832;GO:0002199;GO:0005524;GO:0007339;GO:0006457	-0.202	0.696	FALSE	-0.192	0.74	FALSE
Q564F4	Cct4	T-complex protein 1 subunit delta				Complete proteome; Reference proteome.		GO:0044297;GO:0005832;GO:0002199;GO:0007339	-0.000146	1	FALSE	-0.296	0.535	FALSE
P80316	Cct5	T-complex protein 1 subunit epsilon		Molecular chaperone; assists the folding of proteins upon ATP hydrolysis. As part of the BBS/CCT complex may play a role in the assembly of BBSome, a complex involved in ciliogenesis regulating transports vesicles to the cilia. Known to play a role, in vitro, in the folding of actin and tubulin (By similarity).	Cytoplasm (By similarity). Cytoplasm, cytoskeleton, microtubule organizing center, centrosome (By similarity).	Acetylation; ATP-binding; Chaperone; Complete proteome; Cytoplasm;Cytoskeleton; Direct protein sequencing; Nucleotide-binding;Phosphoprotein; Reference proteome.	Cpn60_TCP1	GO:0044297;GO:0005813;GO:0005832;GO:0005874;GO:0005730;GO:0002199;GO:0005524;GO:0031681;GO:0007339;GO:0006457;GO:0009615	-0.254	0.492	FALSE	-0.0914	0.854	FALSE
Q52KG9	Cct6a	T-complex protein 1 subunit zeta		Molecular chaperone; assists the folding of proteins upon ATP hydrolysis. Known to play a role, in vitro, in the folding of actin and tubulin.	Cytoplasm.	Acetylation; ATP-binding; Chaperone; Complete proteome; Cytoplasm;Direct protein sequencing; Nucleotide-binding; Reference proteome.	Cpn60_TCP1	GO:0001669;GO:0044297;GO:0005832;GO:0002199;GO:0005524;GO:0007339;GO:0006457	-0.106	0.828	FALSE	-0.218	0.671	FALSE
Q3TIJ7	Cct7	T-complex protein 1 subunit eta		Molecular chaperone; assists the folding of proteins upon ATP hydrolysis. Known to play a role, in vitro, in the folding of actin and tubulin.	Cytoplasm.	Acetylation; ATP-binding; Chaperone; Complete proteome; Cytoplasm;Direct protein sequencing; Nucleotide-binding; Reference proteome.	Cpn60_TCP1	GO:0044297;GO:0005832;GO:0005874;GO:0005739;GO:0002199;GO:0005524;GO:0007339;GO:0006457	-0.174	0.71	FALSE	-0.477	0.299	FALSE
Q3UL22	Cct8;Cctq	T-complex protein 1 subunit theta				ATP-binding; Chaperone; Complete proteome; Nucleotide-binding;Reference proteome.	Cpn60_TCP1	GO:0044297;GO:0005832;GO:0002199;GO:0005524;GO:0007339;GO:0044267	-0.328	0.472	FALSE	-0.271	0.605	FALSE
Q9R201	Cd2	T-cell surface antigen CD2	Yes	CD2 interacts with lymphocyte function-associated antigen (LFA-3) and CD48/BCM1 to mediate adhesion between T-cells and other cell types. CD2 is implicated in the triggering of T- cells, the cytoplasmic domain is implicated in the signaling function.	Membrane; Single-pass type I membrane protein.	Cell adhesion; Complete proteome; Disulfide bond; Glycoprotein;Immunoglobulin domain; Membrane; Reference proteome; Repeat; Signal;Transmembrane; Transmembrane helix.	C2-set; V-set	GO:0046658;GO:0009898;GO:0009897;GO:0005576;GO:0016021;GO:0042803;GO:0004872;GO:0007155	0.468	0.364	FALSE	0.12	0.868	FALSE
P24161	Cd247	T-cell surface glycoprotein CD3 zeta chain		Probable role in assembly and expression of the TCR complex as well as signal transduction upon antigen triggering.	Membrane; Single-pass type I membrane protein.	Alternative splicing; Complete proteome; Direct protein sequencing;Disulfide bond; Membrane; Phosphoprotein; Receptor;Reference proteome; Repeat; Signal; Transmembrane;Transmembrane helix.	ITAM; TCR_zetazeta	GO:0042105;GO:0005737;GO:0016021;GO:0004888;GO:0050852	0.955	0.103	FALSE	0.664	0.278	FALSE
Q3U4X0	Cd27	CD27 antigen				Complete proteome; Reference proteome.		GO:0009897;GO:0070233	-0.142	0.924	FALSE	0.429	0.8	FALSE
Q8CDB3	Cd28	T-cell-specific surface glycoprotein CD28		Possibly involved in T-cell activation.	Membrane; Single-pass type I membrane protein.	Complete proteome; Disulfide bond; Glycoprotein;Immunoglobulin domain; Membrane; Phosphoprotein; Reference proteome;Signal; Transmembrane; Transmembrane helix.	V-set	GO:0009897;GO:0016021;GO:0097190;GO:0006955;GO:0045060;GO:0046641;GO:0002863;GO:0045086;GO:0048304;GO:0045840;GO:0009967;GO:0045944;GO:0045066;GO:0031295	-0.793	0.449	FALSE	-1.94	0.0753	FALSE
Q9JLQ0	Cd2ap	CD2-associated protein		Seems to act as an adapter protein between membrane proteins and the actin cytoskeleton. In collaboration with CBLC, modulates the rate of RET turnover and may act as regulatory checkpoint that limits the potency of GDNF on neuronal survival. Controls CBLC function, converting it from an inhibitor to a promoter of RET degradation. May play a role in receptor clustering and cytoskeletal polarity i…	Cytoplasm, cytoskeleton. Cell projection, ruffle. Note=During late anaphase and telophase, concentrates in the vicinity of the midzone microtubules and in the midbody in late telophase (By similarity). Located at podocyte slit diaphragm between podocyte foot processes.	3D-structure; Cell cycle; Cell division; Cell projection; Coiled coil;Complete proteome; Cytoplasm; Cytoskeleton; Mitosis; Phosphoprotein;Reference proteome; Repeat; SH3 domain; SH3-binding.	SH3_1	GO:0005938;GO:0005829;GO:0030139;GO:0031941;GO:0005730;GO:0048471;GO:0005886;GO:0001726;GO:0016477;GO:0016337;GO:0007067;GO:0032911;GO:1900182;GO:0043161;GO:2000249;GO:0048259;GO:0016050	-0.925	0.313	FALSE	-1.23	0.201	FALSE
Q3U4A3	Cd2bp2	CD2 antigen cytoplasmic tail-binding protein 2		Involved in pre-mRNA splicing as component of the U5 snRNP complex that is involved in spliceosome assembly (By similarity).	Cytoplasm (By similarity). Nucleus (By similarity). Note=Predominantly nuclear (By similarity).	Acetylation; Complete proteome; Cytoplasm; mRNA processing;mRNA splicing; Nucleus; Phosphoprotein; Reference proteome.	GYF	GO:0005737;GO:0016607;GO:0005682;GO:0043021;GO:0006397;GO:0010923;GO:0008380	-0.0542	0.911	FALSE	0.173	0.745	FALSE
A0A1B0GS72	Cd37	Tetraspanin;Leukocyte antigen CD37				Complete proteome; Membrane; Reference proteome; Transmembrane;Transmembrane helix.	Tetraspannin	GO:0016021;GO:0042832;GO:0008285;GO:0030886;GO:0002639;GO:0050688;GO:0002920	0.515	0.589	FALSE	-0.652	0.533	FALSE
B0LAX5	Cd3e	T-cell surface glycoprotein CD3 epsilon chain		The CD3 complex mediates signal transduction.	Membrane; Single-pass type I membrane protein.	3D-structure; Complete proteome; Disulfide bond;Immunoglobulin domain; Membrane; Phosphoprotein; Receptor;Reference proteome; Signal; Transmembrane; Transmembrane helix.	ITAM	GO:0042105;GO:0009897;GO:0001772;GO:0016021;GO:0004871;GO:0004888;GO:0097190;GO:0045879;GO:0045060;GO:0046641;GO:0050850;GO:0032729;GO:0045086;GO:0032753;GO:0050731;GO:0002669;GO:0007584;GO:0050852	0.338	0.861	FALSE	0.253	0.919	FALSE
Q76KJ5	Cd3eap	DNA-directed RNA polymerase I subunit RPA34		DNA-dependent RNA polymerase catalyzes the transcription of DNA into RNA using the four ribonucleoside triphosphates as substrates. Component of RNA polymerase I which synthesizes ribosomal RNA precursors. Involved in UBTF-activated transcription, presumably at a step following PIC formation.	Nucleus, nucleolus. Note=Accumulates in the nucleolus of exponentially growing cells.	Acetylation; Complete proteome; Direct protein sequencing; Nucleus;Phosphoprotein; Reference proteome.	RNA_polI_A34	GO:0005736;GO:0005739;GO:0009303	-1.32	0.0372	TRUE	-0.202	0.786	FALSE
Q3U4Y3	Cd3g	T-cell surface glycoprotein CD3 gamma chain				Complete proteome; Reference proteome.		GO:0042105	0.525	0.76	FALSE	0.153	0.948	FALSE
Q0VEI3	Cd40lg	CD40 ligand;CD40 ligand, membrane form;CD40 ligand, soluble form	Yes	Cytokine that binds to TNFRSF5. Mediates B-cell proliferation in the absence of co-stimulus as well as IgE production in the presence of IL-4. Involved in immunoglobulin class switching (By similarity).	Cell membrane; Single-pass type II membrane protein.	3D-structure; Cell membrane; Complete proteome; Cytokine;Disulfide bond; Glycoprotein; Membrane; Reference proteome; Secreted;Signal-anchor; Transmembrane; Transmembrane helix.	TNF	GO:0009897;GO:0005615;GO:0016021;GO:0005174;GO:0030183;GO:0042100;GO:0048305;GO:0006954;GO:0045190;GO:0043066;GO:0030168;GO:2000353;GO:0032735;GO:0051023;GO:0007165	-1.11	0.349	FALSE	-0.916	0.49	FALSE
P15379-11	Cd44	CD44 antigen	Yes			Complete proteome; Disulfide bond; Reference proteome.	Xlink	GO:0016323;GO:0009897;GO:0005540;GO:0060442;GO:0001658;GO:0007155;GO:0010628;GO:0016055;GO:0002246	-0.0108	0.986	FALSE	0.174	0.806	FALSE
Q61735-2	Cd47	Leukocyte surface antigen CD47		Has a role in both cell adhesion by acting as an adhesion receptor for THBS1 on platelets, and in the modulation of integrins. Plays an important role in memory formation and synaptic plasticity in the hippocampus. Receptor for SIRPA, binding to which prevents maturation of immature dendritic cells and inhibits cytokine production by mature dendritic cells. Interaction with SIRPG mediates cell-ce…	Cell membrane; Multi-pass membrane protein.	Alternative splicing; Cell adhesion; Cell membrane; Complete proteome;Direct protein sequencing; Disulfide bond; Glycoprotein;Immunoglobulin domain; Membrane; Pyrrolidone carboxylic acid;Reference proteome; Signal; Transmembrane; Transmembrane helix.	CD47; V-set_CD47	GO:0070062;GO:0005887;GO:0070053;GO:0007155;GO:0008228;GO:0008284;GO:0022409;GO:0050729;GO:0050766;GO:0050870;GO:0009617;GO:0007165	1.88	0.0395	TRUE	0.551	0.577	FALSE
Q6P905	Cd48	CD48 antigen	Yes			Complete proteome; Reference proteome.	V-set	GO:0009897;GO:0016021;GO:0004872;GO:0007165;GO:0042110	1.03	0.206	FALSE	-0.257	0.808	FALSE
Q9ER20	Cd5	T-cell surface glycoprotein CD5	Yes	May act as a receptor in regulating T-cell proliferation.	Cell membrane; Single-pass type I membrane protein.	Cell membrane; Complete proteome; Disulfide bond; Glycoprotein;Membrane; Phosphoprotein; Reference proteome; Repeat; Signal;Transmembrane; Transmembrane helix.	SRCR	GO:0009897;GO:0016021;GO:0005044;GO:0097190;GO:0006898;GO:0031295	0.322	0.761	FALSE	-0.0599	0.966	FALSE
A0A0N4SUM0	Cd69	Early activation antigen CD69		Involved in lymphocyte proliferation and functions as a signal transmitting receptor in lymphocytes, natural killer (NK) cells, and platelets.	Membrane; Single-pass type II membrane protein.	Complete proteome; Disulfide bond; Glycoprotein; Lectin; Membrane;Phosphoprotein; Reference proteome; Signal-anchor; Transmembrane;Transmembrane helix.	Lectin_C	GO:0009897;GO:0016021;GO:0005509;GO:0030246;GO:0035690	0.697	0.398	FALSE	-1.74	0.0486	TRUE
E9Q9E8	Cd84	SLAM family member 5				Complete proteome; Reference proteome.	V-set	GO:0016021;GO:0004872	-0.515	0.721	FALSE	0.0985	0.959	FALSE
Q8K2M2	Cd8a	T-cell surface glycoprotein CD8 alpha chain	Yes			Complete proteome; Disulfide bond; Immunoglobulin domain;Reference proteome.	ig	GO:0009897;GO:0042803;GO:0007166;GO:0045065;GO:0051607;GO:0050850;GO:0002456	1.27	0.216	FALSE	-1.12	0.307	FALSE
Q3TR81	Cd8b1;Cd8b	T-cell surface glycoprotein CD8 beta chain		Identifies cytotoxic/suppressor T-cells that interact with MHC class I bearing targets. CD8 is thought to play a role in the process of T-cell mediated killing.	Membrane; Single-pass type I membrane protein.	3D-structure; Adaptive immunity; Complete proteome; Disulfide bond;Glycoprotein; Immunity; Immunoglobulin domain; Membrane; Polymorphism;Reference proteome; Signal; Transmembrane; Transmembrane helix.	V-set	GO:0009897;GO:0016021;GO:0002376	-1	0.478	FALSE	-0.456	0.8	FALSE
Q3U4S3	Cd96	T-cell surface protein tactile		May be involved in adhesive interactions of activated T and NK cells during the late phase of the immune response. Promotes NK cell-target adhesion by interacting with PVR present on target cells. May function at a time after T and NK cells have penetrated the endothelium using integrins and selectins, when they are actively engaging diseased cells and moving within areas of inflammation (By simi…	Membrane; Single-pass type I membrane protein (By similarity).	Cell adhesion; Complete proteome; Disulfide bond; Glycoprotein;Immunoglobulin domain; Membrane; Reference proteome; Repeat; Signal;Transmembrane; Transmembrane helix.	C2-set_2	GO:0016021;GO:0007155	0.312	0.696	FALSE	-0.12	0.911	FALSE
Q8CII2	Cdc123	Cell division cycle protein 123 homolog		Required for S phase entry of the cell cycle (By similarity).	Cytoplasm (By similarity).	Alternative splicing; Cell cycle; Cell division; Complete proteome;Cytoplasm; Phosphoprotein; Reference proteome.	D123	GO:0005737;GO:0007049;GO:0051301	-0.771	0.264	FALSE	-0.0648	0.951	FALSE
Q3TI84	Cdc16	Cell division cycle protein 16 homolog		Component of the anaphase promoting complex/cyclosome (APC/C), a cell cycle-regulated E3 ubiquitin ligase that controls progression through mitosis and the G1 phase of the cell cycle. The APC/C complex acts by mediating ubiquitination and subsequent degradation of target proteins: it mainly mediates the formation of 'Lys-11'-linked polyubiquitin chains and, to a lower extent, the formation of 'Ly…		Cell cycle; Cell division; Complete proteome; Mitosis; Phosphoprotein;Reference proteome; Repeat; TPR repeat; Ubl conjugation pathway.	TPR_8	GO:0005680;GO:0005813;GO:0005737;GO:0005876;GO:0007067;GO:0070979	-0.338	0.647	FALSE	-1.23	0.0899	FALSE
Q3TEF0	Cdc23	Cell division cycle protein 23 homolog	Yes			Cell cycle; Cell division; Complete proteome; Reference proteome;Repeat; TPR repeat.	APC8; TPR_1	GO:0005680;GO:0051301;GO:0030071	-0.523	0.561	FALSE	-0.158	0.9	FALSE
Q8CFI2	Cdc34;Cdc34-ps;Ube2r2	Ubiquitin-conjugating enzyme E2 R1;Ubiquitin-conjugating enzyme E2 R2		Accepts ubiquitin from the E1 complex and catalyzes its covalent attachment to other proteins. In vitro catalyzes 'Lys- 48'-linked polyubiquitination. Cooperates with the E2 UBCH5C and the SCF(FBXW11) E3 ligase complex for the polyubiquitination of NFKBIA leading to its subsequent proteasomal degradation. Performs ubiquitin chain elongation building ubiquitin chains from the UBE2D3-primed NFKBIA-…	Cytoplasm (By similarity). Nucleus (By similarity). Note=The phosphorylation of the C-terminal tail plays an important role in mediating nuclear localization. Colocalizes with beta-tubulin on mitotic spindles in anaphase (By similarity).	ATP-binding; Cell cycle; Complete proteome; Cytoplasm; Ligase;Nucleotide-binding; Nucleus; Phosphoprotein; Reference proteome;Ubl conjugation pathway.	UQ_con	GO:0005737;GO:0005634;GO:0005524;GO:0004842;GO:0007049;GO:0043951;GO:0090261;GO:0043525;GO:0043161;GO:0070936;GO:0006513;GO:0070848	-0.503	0.77	FALSE	-0.473	0.811	FALSE
Q61081	Cdc37	Hsp90 co-chaperone Cdc37;Hsp90 co-chaperone Cdc37, N-terminally processed		Co-chaperone that binds to numerous kinases and promotes their interaction with the Hsp90 complex, resulting in stabilization and promotion of their activity.	Cytoplasm.	Acetylation; Chaperone; Complete proteome; Cytoplasm; Phosphoprotein;Reference proteome.	CDC37_C; CDC37_M; CDC37_N	GO:0005829;GO:0043234;GO:0032587;GO:0051879;GO:0051726;GO:0060334;GO:0060338	0.0885	0.867	FALSE	0.341	0.519	FALSE
Q9DC48	Cdc40	Pre-mRNA-processing factor 17	Yes	Associates with the spliceosome late in the splicing pathway and may function in the second step of pre-mRNA splicing (By similarity).	Nucleus (By similarity).	Complete proteome; mRNA processing; mRNA splicing; Nucleus;Reference proteome; Repeat; Spliceosome; WD repeat.	WD40	GO:0071013;GO:0006397;GO:0008380	-1.98	0.101	FALSE	-1.24	0.332	FALSE
P60766	Cdc42	Cell division control protein 42 homolog		Plasma membrane-associated small GTPase which cycles between an active GTP-bound and an inactive GDP-bound state. In active state binds to a variety of effector proteins to regulate cellular responses. Involved in epithelial cell polarization processes. Regulates the bipolar attachment of spindle microtubules to kinetochores before chromosome congression in metaphase. Plays a role in the extensio…	Cell membrane; Lipid-anchor; Cytoplasmic side (Potential). Midbody (By similarity). Cytoplasm, cytoskeleton, microtubule organizing center, centrosome (By similarity). Note=Localizes to spindle during prometaphase cells. Moves to the central spindle as cells progressed through anaphase to telophase. Localizes at the end of cytokinesis in the intercellular bridge formed between two daughter cells.…	3D-structure; Alternative splicing; Cell membrane; Complete proteome;Cytoplasm; Cytoskeleton; Differentiation; Direct protein sequencing;GTP-binding; Lipoprotein; Membrane; Methylation; Neurogenesis;Nucleotide-binding; Phosphoprotein; Prenylation; Reference proteome.	Ras	GO:0045177;GO:0071944;GO:0042995;GO:0005829;GO:0030175;GO:0000139;GO:0016020;GO:0005815;GO:0030496;GO:0072686;GO:0043005;GO:0043025;GO:0005886;GO:0030141;GO:0051233;GO:0005525;GO:0003924;GO:0090135;GO:0051017;GO:0034332;GO:0060070;GO:0003161;GO:0034613;GO:0016197;GO:0090136;GO:0060684;GO:0051683;GO:0035088;GO:0046847;GO:0007030;GO:0031069;GO:0060789;GO:0060047;GO:0031424;GO:0003334;GO:0035264;GO:…	-0.591	0.247	FALSE	-0.494	0.37	FALSE
Q3UCF2	Cdc5l	Cell division cycle 5-like protein		DNA-binding protein involved in cell cycle control. May act as a transcription activator. Component of the PRP19-CDC5L complex that forms an integral part of the spliceosome and is required for activating pre-mRNA splicing (By similarity).	Nucleus. Nucleus speckle (By similarity). Cytoplasm (By similarity). Note=May shuttle between cytoplasm and nucleus (By similarity).	Activator; Cell cycle; Coiled coil; Complete proteome; Cytoplasm;Direct protein sequencing; DNA-binding; mRNA processing;mRNA splicing; Nucleus; Phosphoprotein; Reference proteome; Repeat;RNA-binding; Spliceosome; Transcription; Transcription regulation.	Myb_Cef	GO:0071013;GO:0005737;GO:0016607;GO:0005730;GO:0000974;GO:0003682;GO:0003677;GO:0003723;GO:0071987;GO:0007049;GO:0000398;GO:0006355;GO:0006351	-0.174	0.792	FALSE	-0.235	0.735	FALSE
Q8JZM7	Cdc73	Parafibromin		Tumor suppressor probably involved in transcriptional and post-transcriptional control pathways. May be involved in cell cycle progression through the regulation of cyclin D1/PRAD1 expression. Component of the PAF1 complex (PAF1C) which has multiple functions during transcription by RNA polymerase II and is implicated in regulation of development and maintenance of embryonic stem cell pluripotenc…	Nucleus (By similarity).	Acetylation; Cell cycle; Complete proteome; Nucleus; Phosphoprotein;Reference proteome; Transcription; Tumor suppressor;Wnt signaling pathway.	CDC73	GO:0016593;GO:0000993;GO:0007049;GO:0071222;GO:0001711;GO:0033523;GO:0010390;GO:0006378;GO:0008285;GO:0050680;GO:0048147;GO:2000134;GO:0045638;GO:0000122;GO:0031442;GO:0032968;GO:0045944;GO:0030177;GO:0031648;GO:0019827;GO:0006351;GO:0016055	-0.575	0.409	FALSE	-1.09	0.136	FALSE
Q99JW7	Cdk1	Cyclin-dependent kinase 1				ATP-binding; Complete proteome; Kinase; Nucleotide-binding;Reference proteome; Serine/threonine-protein kinase; Transferase.	Pkinase	GO:0005737;GO:0030496;GO:0005634;GO:0005876;GO:0005524;GO:0004693;GO:0035173;GO:0016301;GO:0008353;GO:0007569;GO:0070301;GO:0030261;GO:0000278;GO:0007095;GO:0043066;GO:0031100;GO:0060045;GO:0045740;GO:0010628;GO:0045931;GO:0033160;GO:0006461;GO:0034501;GO:0006468;GO:0014823;GO:0014075;GO:0048678;GO:0046686;GO:0046688;GO:0042493;GO:0045471;GO:0014070;GO:0009636;GO:0055015	-0.531	0.317	FALSE	-0.593	0.299	FALSE
A2A9P6	Cdk11b	Cyclin-dependent kinase 11B				Complete proteome; Reference proteome.	Pkinase	GO:0005634;GO:0005524;GO:0004674;GO:0001824;GO:2001234;GO:0007088	-2.81	0.284	FALSE	-2.37	0.41	FALSE
Q69ZA1-2	Cdk13	Cyclin-dependent kinase 13		Cyclin-dependent kinase which displays CTD kinase activity and is required for RNA splicing. Has CTD kinase activity by hyperphosphorylating the C-terminal heptapeptide repeat domain (CTD) of the largest RNA polymerase II subunit RPB1, thereby acting as a key regulator of transcription elongation. Required for RNA splicing, probably by phosphorylating SRSF1/SF2. Required during hematopoiesis.	Nucleus speckle (By similarity).	Acetylation; Alternative splicing; ATP-binding; Complete proteome;Kinase; mRNA processing; mRNA splicing; Nucleotide-binding; Nucleus;Phosphoprotein; Reference proteome; Serine/threonine-protein kinase;Transferase.	Pkinase	GO:0002945;GO:0019908;GO:0016607;GO:0005524;GO:0004693;GO:0008353;GO:0000380;GO:0007049;GO:0030097;GO:0070816	0.0803	0.849	FALSE	0.0926	0.855	FALSE
Q3U6X7	Cdk2;Cdk3	Cyclin-dependent kinase 2;Cyclin-dependent kinase 3		Serine/threonine-protein kinase involved in the control of the cell cycle; essential for meiosis, but dispensable for mitosis. Phosphorylates CTNNB1, USP37, p53/TP53, NPM1, CDK7, RB1, BRCA2, MYC, NPAT, EZH2. Interacts with cyclins A, B1, B3, D, or E. Triggers duplication of centrosomes and DNA. Acts at the G1-S transition to promote the E2F transcriptional program and the initiation of DNA synthe…	Cytoplasm, cytoskeleton, microtubule organizing center, centrosome (By similarity). Nucleus, Cajal body (By similarity). Cytoplasm (By similarity). Endosome (By similarity). Note=Localized at the centrosomes in late G2 phase after separation of the centrosomes but before the start of prophase. Nuclear-cytoplasmic trafficking is mediated during the inhibition by 1,25-(OH)(2)D(3) (By similarity).	Acetylation; Alternative splicing; ATP-binding; Cell cycle;Cell division; Complete proteome; Cytoplasm; Cytoskeleton; DNA damage;DNA repair; Endosome; Kinase; Magnesium; Meiosis; Metal-binding;Mitosis; Nucleotide-binding; Nucleus; Phosphoprotein;Reference proteome; Serine/threonine-protein kinase; Transferase.	Pkinase	GO:0015030;GO:0000781;GO:0000793;GO:0000307;GO:0005768;GO:0005815;GO:0005654;GO:0005667;GO:0000805;GO:0000806;GO:0005524;GO:0004693;GO:0035173;GO:0046872;GO:0006281;GO:0000082;GO:0007126;GO:0007067;GO:0008284;GO:0032298;GO:0045893;GO:0006813;GO:0007265;GO:0060968	-0.701	0.548	FALSE	-0.55	0.687	FALSE
Q8BP21	Cdk4;CDK4	Cyclin-dependent kinase 4				ATP-binding; Complete proteome; Nucleotide-binding;Reference proteome.	Pkinase	GO:0000307;GO:0005634;GO:0005667;GO:0005524;GO:0004693;GO:0051726;GO:0042127;GO:0007165	-1.8	0.202	FALSE	-0.807	0.628	FALSE
Q543F6	Cdk5	Cyclin-dependent-like kinase 5		Proline-directed serine/threonine-protein kinase essential for neuronal cell cycle arrest and differentiation and may be involved in apoptotic cell death in neuronal diseases by triggering abortive cell cycle re-entry. Interacts with D1 and D3- type G1 cyclins. Phosphorylates SRC, NOS3, VIM/vimentin, p35/CDK5R1, MEF2A, SIPA1L1, SH3GLB1, PXN, PAK1, MCAM/MUC18, SEPT5, SYN1, DNM1, AMPH, SYNJ1, CDK16…	Nucleus (By similarity). Cytoplasm. Cell membrane; Peripheral membrane protein (By similarity). Perikaryon (By similarity). Cell projection, lamellipodium. Cell projection, growth cone. Cell junction, synapse, postsynaptic cell membrane, postsynaptic density (By similarity). Note=In axonal growth cone with extension to the peripheral lamellipodia. Under neurotoxic stress and neuronal injury condi…	Acetylation; Apoptosis; ATP-binding; Cell cycle; Cell division;Cell junction; Cell membrane; Cell projection; Complete proteome;Cytoplasm; Kinase; Membrane; Neurodegeneration; Neurogenesis;Nucleotide-binding; Nucleus; Phosphoprotein;Postsynaptic cell membrane; Reference proteome;Serine/threonine-protein kinase; Synapse; Transferase.	Pkinase	GO:0030424;GO:0030054;GO:0016533;GO:0005829;GO:0030425;GO:0030175;GO:0030426;GO:0030027;GO:0016020;GO:0031594;GO:0043025;GO:0005634;GO:0043204;GO:0014069;GO:0045211;GO:0030549;GO:0005524;GO:0004693;GO:0005176;GO:0043125;GO:0050321;GO:0048148;GO:0070509;GO:0051301;GO:0007160;GO:0021954;GO:0021697;GO:0022038;GO:0030866;GO:0048813;GO:0009790;GO:0021766;GO:0006886;GO:0021819;GO:0008045;GO:0030517;GO:…	-1.08	0.124	FALSE	0.524	0.502	FALSE
Q0VBK8	Cdk6;Gm16505	Cyclin-dependent kinase 6		Serine/threonine-protein kinase involved in the control of the cell cycle and differentiation; promotes G1/S transition. Phosphorylates pRB/RB1 and NPM1. Interacts with D-type G1 cyclins during interphase at G1 to form a pRB/RB1 kinase and controls the entrance into the cell cycle. Involved in initiation and maintenance of cell cycle exit during cell differentiation; prevents cell proliferation a…	Cytoplasm (By similarity). Nucleus (By similarity). Cell projection, ruffle (By similarity). Note=Localized to the ruffling edge of spreading fibroblasts. Kinase activity only in nucleus (By similarity).	Acetylation; ATP-binding; Cell cycle; Cell division; Cell projection;Complete proteome; Cytoplasm; Differentiation; Kinase;Nucleotide-binding; Nucleus; Phosphoprotein; Reference proteome;Serine/threonine-protein kinase; Transferase.	Pkinase	GO:0005737;GO:0005634;GO:0001726;GO:0005524;GO:0004693;GO:0016301;GO:0051301;GO:0060218;GO:0007219;GO:0010628;GO:0033077	0.363	0.292	FALSE	0.292	0.437	FALSE
Q3THG5	Cdk7	Cyclin-dependent kinase 7		Serine/threonine kinase involved in cell cycle control and in RNA polymerase II-mediated RNA transcription. Cyclin- dependent kinases (CDKs) are activated by the binding to a cyclin and mediate the progression through the cell cycle. Each different complex controls a specific transition between 2 subsequent phases in the cell cycle. Required for both activation and complex formation of CDK1/cycli…	Nucleus. Cytoplasm (By similarity). Cytoplasm, perinuclear region (By similarity). Note=Colocalizes with PRKCI in the cytoplasm and nucleus. Translocates from the nucleus to cytoplasm and perinuclear region in response to DNA- bound peptides (By similarity).	Acetylation; ATP-binding; Cell cycle; Cell division;Complete proteome; Cytoplasm; DNA damage; DNA repair; Kinase;Nucleotide-binding; Nucleus; Phosphoprotein; Reference proteome;Serine/threonine-protein kinase; Transcription;Transcription regulation; Transferase.	Pkinase	GO:0005675;GO:0005739;GO:0048471;GO:0005524;GO:0004693;GO:0008094;GO:0008353;GO:0051301;GO:0006281;GO:0045944;GO:0006366	-0.878	0.347	FALSE	-0.0695	0.959	FALSE
Q99J95	Cdk9	Cyclin-dependent kinase 9		Protein kinase involved in the regulation of transcription. Member of the cyclin-dependent kinase pair (CDK9/cyclin-T) complex, also called positive transcription elongation factor b (P-TEFb), which facilitates the transition from abortive to productive elongation by phosphorylating the CTD (C-terminal domain) of the large subunit of RNA polymerase II (RNAP II) POLR2A, SUPT5H and RDBP. This compl…	Nucleus (By similarity). Cytoplasm (By similarity). Nucleus, PML body (By similarity). Note=Accumulates on chromatin in response to replication stress. Complexed with CCNT1 in nuclear speckles, but uncomplexed form in the cytoplasm. The translocation from nucleus to cytoplasm is XPO1/CRM1- dependent. Associates with PML body when acetylated (By similarity).	Acetylation; Alternative splicing; ATP-binding; Complete proteome;Cytoplasm; DNA damage; DNA repair; Kinase; Nucleotide-binding;Nucleus; Phosphoprotein; Reference proteome;Serine/threonine-protein kinase; Transcription;Transcription regulation; Transferase; Ubl conjugation.	Pkinase	GO:0005737;GO:0016605;GO:0008024;GO:0005524;GO:0003682;GO:0004693;GO:0008353;GO:0017069;GO:0044212;GO:0007049;GO:0071345;GO:0006281;GO:0071157;GO:0006468;GO:0006282;GO:0031056;GO:0006355;GO:0043111;GO:0006351	-0.864	0.33	FALSE	0.147	0.91	FALSE
Q564P6	Cdkn1a	Cyclin-dependent kinase inhibitor 1		May be the important intermediate by which p53/TP53 mediates its role as an inhibitor of cellular proliferation in response to DNA damage. Binds to and inhibits cyclin-dependent kinase activity, preventing phosphorylation of critical cyclin- dependent kinase substrates and blocking cell cycle progression. Functions in the nuclear localization and assembly of cyclin D- CDK4 complex and promotes it…	Cytoplasm (By similarity). Nucleus.	Acetylation; Cell cycle; Complete proteome; Cytoplasm; Metal-binding;Nucleus; Phosphoprotein; Protein kinase inhibitor; Reference proteome;Ubl conjugation; Zinc; Zinc-finger.	CDI	GO:0000307;GO:0005829;GO:0070557;GO:0030332;GO:0019912;GO:0004861;GO:0046872;GO:0031668;GO:0071479;GO:0090398;GO:0006977;GO:0000082;GO:0000086;GO:0042771;GO:0071850;GO:0043066;GO:0030308;GO:0008285;GO:0045736;GO:0010629;GO:0031100;GO:0030890;GO:0048146;GO:0043068;GO:0045860;GO:2000379;GO:0006468;GO:0007265;GO:2000278;GO:0007346;GO:0033158;GO:0046685;GO:0051412;GO:0042493;GO:0055093;GO:0010243;GO:…	-1.57	0.104	FALSE	-0.794	0.443	FALSE
Q4FJM2	Cdkn1b	Cyclin-dependent kinase inhibitor 1B		Important regulator of cell cycle progression. Involved in G1 arrest. Potent inhibitor of cyclin E- and cyclin A-CDK2 complexes. Forms a complex with cyclin type D-CDK4 complexes and is involved in the assembly, stability, and modulation of cyclin D-CDK4 complex activation. Acts either as an inhibitor or an activator of cyclin type D-CDK4 complexes depending on its phosphorylation state and/or st…	Nucleus. Cytoplasm. Endosome. Note=Nuclear and cytoplasmic in quiescent cells. AKT- or RSK-mediated phosphorylation on Thr-197, binds 14-3-3, translocates to the cytoplasm and promotes cell cycle progression. Mitogen-activated UHMK1 phosphorylation on Ser-10 also results in translocation to the cytoplasm and cell cycle progression. Phosphorylation on Ser- 10 facilitates nuclear export. Translocat…	Cell cycle; Complete proteome; Cytoplasm; Endosome; Nucleus;Phosphoprotein; Protein kinase inhibitor; Reference proteome;Ubl conjugation.	CDI	GO:0005829;GO:0005768;GO:0005634;GO:0043234;GO:0004861;GO:0008656;GO:0048102;GO:0007050;GO:0071236;GO:0071285;GO:0071407;GO:0000082;GO:0048839;GO:0071850;GO:0043066;GO:0030308;GO:0051271;GO:0045736;GO:0060770;GO:0045930;GO:0045892;GO:0010942;GO:0008284;GO:0031116;GO:0045732;GO:0006813;GO:0043200;GO:0046686;GO:0042493;GO:0032355;GO:0009749;GO:0001666;GO:0043434;GO:0007605	1.07	0.29	FALSE	-0.0853	0.955	FALSE
Q8BI72	Cdkn2aip	CDKN2A-interacting protein		Activates p53/TP53 by CDKN2A-dependent and CDKN2A- independent pathways (By similarity).	Nucleus, nucleoplasm (By similarity).	Acetylation; Complete proteome; Nucleus; Phosphoprotein;Reference proteome; RNA-binding; Ubl conjugation.	DUF3469	GO:0001652;GO:0005654;GO:0005634;GO:0003723;GO:0030308;GO:0009967;GO:0031647	-0.133	0.94	FALSE	-3.03	0.0628	FALSE
Q4VAA2	Cdv3	Protein CDV3			Cytoplasm.	Acetylation; Alternative splicing; Complete proteome; Cytoplasm;Phosphoprotein; Reference proteome.	CDV3	GO:0005737;GO:0005730	0.799	0.377	FALSE	1.09	0.264	FALSE
A0A0R4J0T5	Celf1	CUGBP Elav-like family member 1		RNA-binding protein implicated in the regulation of several post-transcriptional events. Involved in pre-mRNA alternative splicing, mRNA translation and stability. Mediates exon inclusion and/or exclusion in pre-mRNA that are subject to tissue-specific and developmentally regulated alternative splicing (By similarity). Specifically activates exon 5 inclusion of cardiac isoforms of TNNT2 during he…	Nucleus. Cytoplasm. Note=RNA-binding activity is detected in both nuclear and cytoplasmic compartments (By similarity).	Acetylation; Activator; Alternative splicing; Complete proteome;Cytoplasm; mRNA processing; mRNA splicing; Nucleus; Phosphoprotein;Reference proteome; Repeat; RNA-binding.	RRM_1	GO:0005737;GO:0005634;GO:0042835;GO:0003729;GO:0000166;GO:0031369;GO:0006376;GO:0040018;GO:0043484;GO:0007286	-0.614	0.23	FALSE	0.533	0.333	FALSE
A0A0R4J2B0	Celf2	CUGBP Elav-like family member 2				Complete proteome; Reference proteome.	RRM_1	GO:0005737;GO:0005634;GO:0003676;GO:0000166;GO:0006376	-0.141	0.73	FALSE	-0.546	0.155	FALSE
Q9CXS4	Cenpv	Centromere protein V		Required for distribution of pericentromeric heterochromatin in interphase nuclei and for centromere formation and organization, chromosome alignment and cytokinesis (By similarity).	Chromosome, centromere, kinetochore (By similarity). Nucleus (By similarity). Cytoplasm, cytoskeleton, spindle (By similarity). Note=Enriched at the nuclear periphery and around the nucleolus. In mitotic cells, localizes to kinetochores from prometaphase to metaphase. At anaphase onset, transfers to the spindle midzone and then to the mid-body in telophase and cytokinesis (By similarity).	Alternative splicing; Cell cycle; Cell division; Centromere;Chromosome; Complete proteome; Cytoplasm; Cytoskeleton; Kinetochore;Mitosis; Nucleus; Reference proteome.	GFA	GO:0000777;GO:0005737;GO:0000776;GO:0005634;GO:0051233;GO:0016846;GO:0001667;GO:0031508;GO:0007067;GO:0032467;GO:0033044	-2.09	0.0589	FALSE	0.275	0.85	FALSE
H7BX26	Cep170	Centrosomal protein of 170 kDa				Complete proteome; Reference proteome.	FHA	GO:0005813	-0.203	0.858	FALSE	0.0897	0.954	FALSE
Z4YJH1	Cetn2	Centrin-2				Calcium; Complete proteome; Reference proteome.	EF-hand_7	GO:0005814;GO:0036064;GO:0032391;GO:0071942;GO:0005509;GO:0031683;GO:0032795;GO:0008017;GO:0007099;GO:0006289;GO:0032465	0.594	0.495	FALSE	0.967	0.299	FALSE
Q8BTU1	Cfap20	Cilia- and flagella-associated protein 20				Alternative splicing; Complete proteome; Reference proteome.	DUF667	GO:0005929	-2.77	0.0392	TRUE	-1.15	0.4	FALSE
Q8C6E0	Cfap36	Cilia- and flagella-associated protein 36		May act as an effector for ARL3 (By similarity).		Coiled coil; Complete proteome; Reference proteome.	ARL2_Bind_BART		0.355	0.79	FALSE	1.37	0.263	FALSE
O88271	Cfdp1	Craniofacial development protein 1	Yes	May play a role during embryogenesis. May modulate tooth organogenesis since alterations of this protein function affect tooth organs size as well as individual cell fate and survival. In embryonic cells, blockage of the function results in increased number of apoptotic cells, reduced proliferation, alterations in cell shape and fibronection matrix synthesis.		Complete proteome; Developmental protein; Phosphoprotein;Reference proteome.	BCNT	GO:0005604;GO:0007155;GO:0007275;GO:2000270;GO:0042127;GO:0008360	-0.778	0.567	FALSE	-0.17	0.931	FALSE
Q544Y7	Cfl1	Cofilin-1				Actin-binding; Complete proteome; Reference proteome.	Cofilin_ADF	GO:0030864;GO:0030027;GO:0030042;GO:0007015;GO:0030030;GO:0030010;GO:0000281;GO:0045792;GO:0001755;GO:0001842;GO:0030836;GO:0006606;GO:0006468;GO:0022604;GO:0043200;GO:0009615	0.232	0.584	FALSE	0.372	0.403	FALSE
Q3UHW9	Cfl2	Cofilin-2		Controls reversibly actin polymerization and depolymerization in a pH-sensitive manner. It has the ability to bind G- and F-actin in a 1:1 ratio of cofilin to actin. It is the major component of intranuclear and cytoplasmic actin rods.	Nucleus matrix. Cytoplasm, cytoskeleton.	Acetylation; Actin-binding; Complete proteome; Cytoplasm;Cytoskeleton; Nucleus; Phosphoprotein; Reference proteome.	Cofilin_ADF	GO:0015629;GO:0005737;GO:0016363;GO:0030042;GO:0007015;GO:0046716;GO:0045214	-0.0575	0.943	FALSE	-0.603	0.439	FALSE
Q8BHG9	Cggbp1	CGG triplet repeat-binding protein 1		Binds to nonmethylated 5'-d(CGG)(n)-3' trinucleotide repeats in the FMR1 promoter. May play a role in regulating FMR1 promoter (By similarity).	Nucleus (By similarity).	Complete proteome; DNA-binding; Nucleus; Phosphoprotein;Reference proteome; Transcription; Transcription regulation.		GO:0005634;GO:0003677;GO:0006355;GO:0006351	-1.61	0.0875	FALSE	-1.85	0.0548	FALSE
Q9D0N7	Chaf1b	Chromatin assembly factor 1 subunit B		Complex that is thought to mediate chromatin assembly in DNA replication and DNA repair. Assembles histone octamers onto replicating DNA in vitro. CAF-1 performs the first step of the nucleosome assembly process, bringing newly synthesized histones H3 and H4 to replicating DNA; histones H2A/H2B can bind to this chromatin precursor subsequent to DNA replication to complete the histone octamer (By …	Nucleus (By similarity). Note=DNA replication foci (By similarity).	Acetylation; Cell cycle; Complete proteome; DNA damage; DNA repair;DNA replication; Nucleus; Phosphoprotein; Reference proteome; Repeat;Transcription; Transcription regulation; WD repeat.	WD40	GO:0033186;GO:0005829;GO:0005654;GO:0007049;GO:0031497;GO:0006281;GO:0006260;GO:0006355;GO:0006351	0.315	0.823	FALSE	-0.26	0.881	FALSE
A0A140T8S5	Champ1	Chromosome alignment-maintaining phosphoprotein 1		Required for proper alignment of chromosomes at metaphase and their accurate segregation during mitosis. Involved in the maintenance of spindle microtubules attachment to the kinetochore during sister chromatid biorientation. May recruit CENPE and CENPF to the kinetochore (By similarity).	Nucleus (By similarity). Chromosome (By similarity). Chromosome, centromere, kinetochore (By similarity). Cytoplasm, cytoskeleton, spindle (By similarity).	Acetylation; Centromere; Chromosome; Complete proteome; Cytoplasm;Cytoskeleton; Kinetochore; Metal-binding; Nucleus; Phosphoprotein;Reference proteome; Zinc; Zinc-finger.		GO:0000777;GO:0005737;GO:0005634;GO:0005819;GO:0046872;GO:0003676;GO:0034501;GO:0035372;GO:0031134	0.0919	0.948	FALSE	1.3	0.332	FALSE
Q8VEA4	Chchd4	Mitochondrial intermembrane space import and assembly protein 40		Functions as chaperone and catalyzes the formation of disulfide bonds in substrate proteins, such as COX17. Required for the import and folding of small cysteine-containing proteins (small Tim) in the mitochondrial intermembrane space (IMS). Precursor proteins to be imported into the IMS are translocated in their reduced form into the mitochondria. The oxidized form of CHCHD4/MIA40 forms a transi…	Mitochondrion intermembrane space (By similarity).	Complete proteome; Disulfide bond; Mitochondrion; Oxidoreductase;Protein transport; Redox-active center; Reference proteome;Translocation; Transport.	CHCH	GO:0005758;GO:0015035;GO:0051084;GO:0045041;GO:0022417	0.753	0.554	FALSE	1.22	0.361	FALSE
Q52KC5	Chchd5	Coiled-coil-helix-coiled-coil-helix domain-containing protein 5			Mitochondrion intermembrane space (Potential).	Acetylation; Complete proteome; Disulfide bond; Mitochondrion;Reference proteome.		GO:0005758	0.135	0.905	FALSE	2.26	0.0387	TRUE
E9QAS4	Chd4;Chd5	Chromodomain-helicase-DNA-binding protein 4;Chromodomain-helicase-DNA-binding protein 5				Complete proteome; Metal-binding; Nucleus; Reference proteome; Zinc;Zinc-finger.	CHDCT2; CHDNT; Chromo; DUF1086; DUF1087; Helicase_C; PHD; SNF2_N	GO:0016581;GO:0005524;GO:0008026;GO:0003677;GO:0008270;GO:0006200;GO:0006355	-2.88	0.00713	TRUE	-2.68	0.00986	TRUE
F7AL76	Chd8	Chromodomain-helicase-DNA-binding protein 8				Complete proteome; Nucleus; Reference proteome.	BRK; Chromo; Helicase_C; SNF2_N	GO:0005634;GO:0005524;GO:0003677;GO:0004386;GO:0001701;GO:0008152;GO:2000270	-0.303	0.828	FALSE	-0.846	0.544	FALSE
O35280-2	Chek1	Serine/threonine-protein kinase Chk1				ATP-binding; Complete proteome; Nucleotide-binding;Reference proteome.	Pkinase	GO:0005634;GO:0005657;GO:0005524;GO:0004672;GO:0004674;GO:0000077;GO:0006281;GO:0000086;GO:0042127;GO:0010468	-1	0.312	FALSE	-0.299	0.815	FALSE
G5E8I8	Cherp	Calcium homeostasis endoplasmic reticulum protein				Complete proteome; Reference proteome.	CTD_bind; G-patch; Surp	GO:0048471;GO:0033017;GO:0003723;GO:0008285;GO:0051533;GO:0051209;GO:0006396	-0.579	0.613	FALSE	-3.7	0.00369	TRUE
A2AD03	Chm	Rab proteins geranylgeranyltransferase component A 1				Complete proteome; Reference proteome.	GDI	GO:0005968;GO:0004663;GO:0001568;GO:0006886;GO:0008152	-0.409	0.525	FALSE	0.444	0.544	FALSE
Q9D8B3	Chmp4b	Charged multivesicular body protein 4b		Probable core component of the endosomal sorting required for transport complex III (ESCRT-III) which is involved in multivesicular bodies (MVBs) formation and sorting of endosomal cargo proteins into MVBs. MVBs contain intraluminal vesicles (ILVs) that are generated by invagination and scission from the limiting membrane of the endosome and mostly are delivered to lysosomes enabling degradation …	Cytoplasm, cytosol (By similarity). Late endosome membrane; Peripheral membrane protein (By similarity).	Acetylation; Coiled coil; Complete proteome; Cytoplasm; Endosome;Membrane; Phosphoprotein; Protein transport; Reference proteome;Transport; Ubl conjugation.	Snf7	GO:0005829;GO:0031902;GO:0030496;GO:0015031	0.908	0.151	FALSE	0.645	0.342	FALSE
Q9D7S9	Chmp5	Charged multivesicular body protein 5		Probable peripherally associated component of the endosomal sorting required for transport complex III (ESCRT-III) which is involved in multivesicular bodies (MVBs) formation and sorting of endosomal cargo proteins into MVBs. MVBs contain intraluminal vesicles (ILVs) that are generated by invagination and scission from the limiting membrane of the endosome and mostly are delivered to lysosomes en…	Cytoplasm, cytosol (By similarity). Endosome membrane; Peripheral membrane protein (By similarity). Note=Localizes to the midbody of dividing cells. Localized in two distinct rings on either side of the Fleming body (By similarity).	Coiled coil; Complete proteome; Cytoplasm; Endosome; Membrane;Phosphoprotein; Protein transport; Reference proteome; Transport;Ubl conjugation.	Snf7	GO:0005829;GO:0010008;GO:0005634;GO:0008333;GO:0007040;GO:0015031;GO:0001919	-0.538	0.482	FALSE	-0.187	0.856	FALSE
Q9D1P4	Chordc1	Cysteine and histidine-rich domain-containing protein 1		Regulates centrosome duplication, probably by inhibiting the kinase activity of ROCK2. Proposed to act as co-chaperone for HSP90. May play a role in the regulation of NOD1 via a HSP90 chaperone complex. In vitro, has intrinsic chaperone activity. This function may be achieved by inhibiting association of ROCK2 with NPM1. Involved in stress response. Prevents tumorigenesis (By similarity).		Acetylation; Chaperone; Complete proteome; Metal-binding;Phosphoprotein; Reference proteome; Repeat; Stress response; Zinc.	CHORD; CS	GO:0008270;GO:0061077;GO:2000299;GO:1900034;GO:0010824;GO:0006950	-0.368	0.353	FALSE	-0.0299	0.959	FALSE
B7ZMS6	Chtop	Chromatin target of PRMT1 protein				Complete proteome; Reference proteome.			1.88	0.0603	FALSE	2.33	0.0268	TRUE
Q6DG52	Churc1	Protein Churchill		Transcriptional activator that mediates FGF signaling during neural development. Plays a role in the regulation of cell movement. Does not bind DNA by itself (By similarity).		Activator; Alternative splicing; Complete proteome;Developmental protein; Metal-binding; Reference proteome;Transcription; Transcription regulation; Zinc.	Churchill	GO:0005634;GO:0003677;GO:0008270;GO:0007498;GO:0007275;GO:0045944;GO:0006351	0.72	0.223	FALSE	0.00189	0.999	FALSE
Q99KN2	Ciao1	Probable cytosolic iron-sulfur protein assembly protein CIAO1		Key component of the cytosolic iron-sulfur protein assembly (CIA) complex, a multiprotein complex that mediates the incorporation of iron-sulfur cluster into extramitochondrial Fe/S proteins. Seems to specifically modulate the transactivation activity of WT1. As part of the mitotic spindle-associated MMXD complex it may play a role in chromosome segregation (By similarity).		Chromosome partition; Complete proteome; Reference proteome; Repeat;WD repeat.	WD40	GO:0097361;GO:0071817;GO:0003700;GO:0007059;GO:0016226;GO:0006357	0.193	0.818	FALSE	0.116	0.912	FALSE
Q8WTY4	Ciapin1	Anamorsin		Component of the cytosolic iron-sulfur (Fe-S) protein assembly (CIA) machinery. Required for the maturation of extramitochondrial Fe-S proteins. Part of an electron transfer chain functioning in an early step of cytosolic Fe-S biogenesis. Electrons are transferred to the Fe-S cluster from NADPH via the FAD- and FMN-containing protein NDOR1 (By similarity). Has anti- apoptotic effects in the cell.…	Cytoplasm. Nucleus. Mitochondrion intermembrane space (By similarity).	2Fe-2S; Apoptosis; Complete proteome; Cytoplasm; Iron; Iron-sulfur;Metal-binding; Mitochondrion; Nucleus; Phosphoprotein;Reference proteome.	CIAPIN1	GO:0005737;GO:0005758;GO:0005730;GO:0051537;GO:0009055;GO:0046872;GO:0006915;GO:0030097;GO:0016226;GO:0043066	-0.468	0.312	FALSE	0.206	0.714	FALSE
D3YU80	Cirbp	Cold-inducible RNA-binding protein				Complete proteome; Reference proteome.	RRM_1	GO:0003730;GO:0000166;GO:0070181;GO:0048255;GO:0045727;GO:0009409;GO:0009411	0.379	0.807	FALSE	-0.343	0.852	FALSE
Q3UJY3	Cirh1a	Cirhin		May be a transcriptional regulator (By similarity). Acts as a positive regulator of HIVEP1 (By similarity). Ribosome biogenesis factor involved in small subunit (SSU) pre-rRNA processing at sites A', A0, 1 and 2b (By similarity).	Nucleus, nucleolus (By similarity).	Complete proteome; Nucleus; Reference proteome; Repeat;rRNA processing; Transcription; Transcription regulation; WD repeat.	WD40	GO:0034455;GO:0030490;GO:0006355;GO:0006351	0.111	0.902	FALSE	-0.736	0.41	FALSE
Z4YL78	Ckap5	Cytoskeleton-associated protein 5		Binds to the plus end of microtubules and regulates microtubule dynamics and microtubule organization. Promotes cytoplasmic microtubule nucleation and elongation. Plays a major role in organizing spindle poles (By similarity).	Cytoplasm, cytoskeleton, microtubule organizing center, centrosome (By similarity). Cytoplasm, cytoskeleton, spindle pole (By similarity). Note=Detected on centrosomes during interphase. Detected on spindle poles and microtubules during mitosis (By similarity).	Acetylation; Alternative splicing; Cell cycle; Cell division;Complete proteome; Cytoplasm; Cytoskeleton; Mitosis; Phosphoprotein;Reference proteome; Repeat.	CLASP_N	GO:0005737;GO:0005815;GO:0043234;GO:0000922;GO:0007067;GO:0050658	-1.04	0.0325	TRUE	-1.34	0.00842	TRUE
Q04447	Ckb	Creatine kinase B-type		Reversibly catalyzes the transfer of phosphate between ATP and various phosphogens (e.g. creatine phosphate). Creatine kinase isoenzymes play a central role in energy transduction in tissues with large, fluctuating energy demands, such as skeletal muscle, heart, brain and spermatozoa.	Cytoplasm.	ATP-binding; Complete proteome; Cytoplasm; Direct protein sequencing;Kinase; Nitration; Nucleotide-binding; Phosphoprotein;Reference proteome; Transferase.	ATP-gua_Ptrans; ATP-gua_PtransN	GO:0005739;GO:0005524;GO:0004111;GO:0007420;GO:0030644	0.709	0.269	FALSE	0.422	0.57	FALSE
P61025	Cks1b;Cks1brt	Cyclin-dependent kinases regulatory subunit 1;Cyclin-dependent kinases regulatory subunit		Binds to the catalytic subunit of the cyclin dependent kinases and is essential for their biological function (By similarity).		Acetylation; Cell cycle; Cell division; Complete proteome;Reference proteome.	CKS	GO:0016538;GO:0007049;GO:0051301;GO:0045859	0.65	0.827	FALSE	1.42	0.643	FALSE
E9Q6L0	Clasp1	CLIP-associating protein 1				Complete proteome; Reference proteome.	CLASP_N	GO:0005881;GO:0005828;GO:0008017;GO:0051301;GO:0051294;GO:0007026	-1.73	0.015	TRUE	-0.886	0.183	FALSE
E9Q8N5	Clasp2	CLIP-associating protein 2				Complete proteome; Reference proteome.	CLASP_N	GO:0005881;GO:0005794;GO:0005828;GO:0008017;GO:0016477;GO:0007163;GO:0007026	-0.685	0.426	FALSE	-0.0843	0.949	FALSE
F5BFH0	Clec2d;Clrh;Clec2j;Clec2g	C-type lectin domain family 2 member D;C-type lectin domain family 2 member G		Receptor for KLRB1B that protects target cells against natural killer cell-mediated lysis. Inhibits osteoclast formation. Binds high molecular weight sulfated glycosaminoglycans.	Cell membrane; Single-pass type II membrane protein. Cell surface (By similarity).	Cell membrane; Complete proteome; Disulfide bond; Glycoprotein;Lectin; Membrane; Phosphoprotein; Receptor; Reference proteome;Signal-anchor; Transmembrane; Transmembrane helix.	Lectin_C	GO:0009897;GO:0005887;GO:0030246;GO:0046703;GO:0004888;GO:0006968;GO:0045671;GO:0042270	-0.082	0.936	FALSE	-0.566	0.587	FALSE
Q542F1	Clic1	Chloride intracellular channel protein;Chloride intracellular channel protein 1		Can insert into membranes and form chloride ion channels. Channel activity depends on the pH. Membrane insertion seems to be redox-regulated and may occur only under oxydizing conditions (By similarity).	Nucleus (By similarity). Nucleus membrane; Single-pass membrane protein (By similarity). Cytoplasm (By similarity). Cell membrane; Single-pass membrane protein (By similarity). Note=Mostly in the nucleus including in the nuclear membrane. Small amount in the cytoplasm and the plasma membrane. Exists both as soluble cytoplasmic protein and as membrane protein with probably a single transmembrane d…	Acetylation; Cell membrane; Chloride; Chloride channel;Complete proteome; Cytoplasm; Disulfide bond; Ion channel;Ion transport; Membrane; Nucleus; Phosphoprotein; Reference proteome;Transmembrane; Transmembrane helix; Transport; Voltage-gated channel.	GST_N_3	GO:0034707;GO:0005739;GO:0031965;GO:0005634;GO:0048471;GO:0005886;GO:0005247;GO:1902476;GO:0045669;GO:0044070;GO:0051881	0.0168	0.973	FALSE	0.0426	0.949	FALSE
Q543N5	Clic4;Clic6;Clic5	Chloride intracellular channel protein;Chloride intracellular channel protein 4;Chloride intracellular channel protein 5;Chloride intracellular channel protein 6		Can insert into membranes and form poorly selective ion channels that may also transport chloride ions. Channel activity depends on the pH. Membrane insertion seems to be redox-regulated and may occur only under oxydizing conditions. Promotes cell- surface expression of HRH3 (By similarity). May play a role in angiogenesis.	Cytoplasm (By similarity). Cytoplasmic vesicle membrane; Single-pass membrane protein (By similarity). Nucleus (By similarity). Cell membrane; Single-pass membrane protein (By similarity). Mitochondrion. Note=Exists both as soluble cytoplasmic protein and as membrane protein with probably a single transmembrane domain. Present in an intracellular vesicular compartment that likely represent trans-…	Acetylation; Cell membrane; Chloride; Chloride channel;Complete proteome; Cytoplasm; Cytoplasmic vesicle; Ion channel;Ion transport; Membrane; Mitochondrion; Nucleus; Phosphoprotein;Reference proteome; Transmembrane; Transmembrane helix; Transport;Voltage-gated channel.	GST_N_3	GO:0045177;GO:0009986;GO:0005911;GO:0005813;GO:0034707;GO:0030659;GO:0005829;GO:0005902;GO:0030496;GO:0005739;GO:0016363;GO:0048471;GO:0005886;GO:0005254;GO:0005247;GO:0001525;GO:0048754;GO:0071277;GO:0001886;GO:0009566;GO:0030216;GO:0035264;GO:0030336;GO:0044070;GO:0061299;GO:0007035	0.778	0.357	FALSE	0.303	0.777	FALSE
Q5SUH7	Clint1	Clathrin interactor 1				Complete proteome; Reference proteome.	ENTH	GO:0030136;GO:0005794;GO:0048268	-1.82	0.0403	TRUE	-1.73	0.049	TRUE
D3Z2Z1	Clip1;Clip2	CAP-Gly domain-containing linker protein 1;CAP-Gly domain-containing linker protein 2				Complete proteome; Reference proteome.	CAP_GLY	GO:0005881;GO:0035371;GO:0008017;GO:0003676;GO:0008270;GO:0031116	-0.347	0.366	FALSE	-0.497	0.222	FALSE
Q923F1	Clns1a;Icln	Methylosome subunit pICln				Complete proteome; Reference proteome.		GO:0005829;GO:0006884;GO:0006821	-0.377	0.774	FALSE	0.341	0.826	FALSE
Q99LI9	Clp1	Polyribonucleotide 5-hydroxyl-kinase Clp1		Polynucleotide kinase that can phosphorylate the 5'- hydroxyl groups of double-stranded RNA (dsRNA), single-stranded RNA (ssRNA), double-stranded DNA (dsDNA) and double-stranded DNA:RNA hybrids. dsRNA is phosphorylated more efficiently than dsDNA, and the RNA component of a DNA:RNA hybrid is phosphorylated more efficiently than the DNA component. Appears to have roles in both tRNA splicing and mR…	Nucleus (By similarity).	ATP-binding; Complete proteome; Kinase; Magnesium; Manganese;mRNA processing; Nickel; Nucleotide-binding; Nucleus;Reference proteome; Transferase; tRNA processing.	Clp1	GO:0005849;GO:0000214;GO:0005524;GO:0046404;GO:0051736;GO:0051733;GO:0031124;GO:0035087;GO:0030423;GO:0006388	-0.219	0.912	FALSE	0.892	0.673	FALSE
Q3UGS9	Clpb	Caseinolytic peptidase B protein homolog				ANK repeat; ATP-binding; Complete proteome; Nucleotide-binding;Reference proteome; Repeat.	AAA_2; Ank; Ank_2; ClpB_D2-small	GO:0005739;GO:0005524;GO:0017111;GO:0008152	-1.07	0.0899	FALSE	-0.271	0.717	FALSE
Q9EPL2-2	Clstn1	Calsyntenin-1;Soluble Alc-alpha;CTF1-alpha		Induces KLC1 association with vesicles and functions as a cargo in axonal anterograde transport. Complex formation with APBA2 and APP, stabilizes APP metabolism and enhances APBA2- mediated suppression of beta-APP40 secretion, due to the retardation of intracellular APP maturation. In complex with APBA2 and C99, a C-terminal APP fragment, abolishes C99 interaction with PSEN1 and thus APP C99 clea…	Endoplasmic reticulum membrane; Single-pass type I membrane protein. Golgi apparatus membrane. Cell projection. Cell junction, synapse, postsynaptic cell membrane; Single-pass type I membrane protein. Nucleus (By similarity). Note=Neurite tips. Localized in the postsynaptic membrane of both excitatory and inhibitory synapses. The AlcICD fragment is translocated to the nucleus upon interaction wit…	Alternative splicing; Calcium; Cell adhesion; Cell junction;Cell membrane; Cell projection; Complete proteome;Direct protein sequencing; Endoplasmic reticulum; Glycoprotein;Golgi apparatus; Membrane; Nucleus; Postsynaptic cell membrane;Reference proteome; Repeat; Signal; Synapse; Transmembrane;Transmembrane helix.	Cadherin	GO:0030054;GO:0042995;GO:0005789;GO:0005576;GO:0000139;GO:0016021;GO:0005634;GO:0045211;GO:0005509;GO:0006874;GO:0007156;GO:0007268	2.53	0.0518	FALSE	2.99	0.0272	TRUE
B1AWE0	Clta	Clathrin light chain A				Complete proteome; Reference proteome.	Clathrin_lg_ch	GO:0030132;GO:0030130;GO:0005198;GO:0006886;GO:0016192	1.76	0.143	FALSE	1.25	0.331	FALSE
Q5SXR6	Cltc;mKIAA0034	Clathrin heavy chain;Clathrin heavy chain 1		Clathrin is the major protein of the polyhedral coat of coated pits and vesicles (By similarity).	Cytoplasmic vesicle membrane; Peripheral membrane protein; Cytoplasmic side. Membrane, coated pit; Peripheral membrane protein; Cytoplasmic side (By similarity).	Coated pit; Complete proteome; Cytoplasmic vesicle; Membrane;Reference proteome.	Clathrin; Clathrin-link; Clathrin_propel	GO:0030132;GO:0030130;GO:0030117;GO:0005739;GO:0031523;GO:0003725;GO:0005198;GO:0006886;GO:0090307;GO:0016192	-0.613	0.366	FALSE	-0.188	0.835	FALSE
A0A0R4J140	Cluh	Clustered mitochondria protein homolog		Involved in proper cytoplasmic distribution of mitochondria (By similarity).	Cytoplasm (By similarity).	Alternative splicing; Complete proteome; Cytoplasm; Phosphoprotein;Reference proteome; Repeat; TPR repeat.	CLU; CLU_N	GO:0005737;GO:0048312	-1.24	0.0876	FALSE	-0.934	0.208	FALSE
A0A0R4J0B4	Cmas	N-acylneuraminate cytidylyltransferase		Catalyzes the activation of N-acetylneuraminic acid (NeuNAc) to cytidine 5'-monophosphate N-acetylneuraminic acid (CMP-NeuNAc), a substrate required for the addition of sialic acid. Has some activity toward NeuNAc, N-glycolylneuraminic acid (Neu5Gc) or 2-keto-3-deoxy-D-glycero-D-galacto-nononic acid (KDN).	Nucleus.	3D-structure; Acetylation; Alternative splicing; Complete proteome;Nucleotidyltransferase; Nucleus; Reference proteome; Transferase.	CTP_transf_3	GO:0005634;GO:0008781;GO:0006055;GO:0009103;GO:0006054	-0.729	0.383	FALSE	-1.19	0.181	FALSE
Q9DBP5	Cmpk1	UMP-CMP kinase	Yes	Catalyzes the phosphorylation of pyrimidine nucleoside monophosphates at the expense of ATP. Plays an important role in de novo pyrimidine nucleotide biosynthesis. Has preference for UMP and CMP as phosphate acceptors. Also displays broad nucleoside diphosphate kinase activity (By similarity).	Nucleus (By similarity). Cytoplasm (By similarity). Note=Predominantly nuclear (By similarity).	Acetylation; ATP-binding; Complete proteome; Cytoplasm;Direct protein sequencing; Kinase; Nucleotide-binding; Nucleus;Pyrimidine biosynthesis; Reference proteome; Transferase.		GO:0005737;GO:0005634;GO:0005524;GO:0004127;GO:0004550;GO:0033862;GO:0046705;GO:0006240;GO:0006227;GO:0009142;GO:0022602;GO:0018963;GO:0006225	-0.507	0.393	FALSE	0.209	0.785	FALSE
Q9CZT6	Cmss1	Protein CMSS1				Complete proteome; Phosphoprotein; Reference proteome.			-0.978	0.488	FALSE	-1.1	0.48	FALSE
Q9DBC3	Cmtr1;Gm28043;mKIAA0646	Cap-specific mRNA (nucleoside-2-O-)-methyltransferase 1		S-adenosyl-L-methionine-dependent methyltransferase that mediates mRNA cap1 2'-O-ribose methylation to the 5'-cap structure of mRNAs. Methylates the ribose of the first nucleotide of a m(7)GpppG-capped mRNA and small nuclear RNA (snRNA) to produce m(7)GpppRm (cap1). Displays a preference for cap0 transcripts. Cap1 modification is linked to higher levels of translation. May be involved in the inte…	Nucleus (By similarity).	Acetylation; Complete proteome; Methyltransferase; mRNA capping;mRNA processing; Nucleus; Phosphoprotein; Reference proteome;S-adenosyl-L-methionine; Transferase.	FtsJ; G-patch	GO:0005737;GO:0005634;GO:0004483;GO:0003676;GO:0006370;GO:0097309	-1.53	0.124	FALSE	-1.21	0.24	FALSE
Q3U5V2	Cnbp	Cellular nucleic acid-binding protein		Single-stranded DNA-binding protein, with specificity to the sterol regulatory element (SRE). Involved in sterol-mediated repression.	Cytoplasm. Endoplasmic reticulum.	Acetylation; Alternative splicing; Complete proteome; Cytoplasm;DNA-binding; Endoplasmic reticulum; Metal-binding; Reference proteome;Repeat; Repressor; Transcription; Transcription regulation; Zinc;Zinc-finger.	zf-CCHC	GO:0005829;GO:0005783;GO:0005634;GO:0003697;GO:0003727;GO:0008270;GO:0008284;GO:0045944;GO:0006351	-0.147	0.841	FALSE	0.309	0.695	FALSE
Q3U5V2	Cnbp	Cellular nucleic acid-binding protein		Single-stranded DNA-binding protein, with specificity to the sterol regulatory element (SRE). Involved in sterol-mediated repression.	Cytoplasm. Endoplasmic reticulum.	Acetylation; Alternative splicing; Complete proteome; Cytoplasm;DNA-binding; Endoplasmic reticulum; Metal-binding; Reference proteome;Repeat; Repressor; Transcription; Transcription regulation; Zinc;Zinc-finger.	zf-CCHC	GO:0005829;GO:0005783;GO:0005634;GO:0003697;GO:0003727;GO:0008270;GO:0008284;GO:0045944;GO:0006351	-0.147	0.841	FALSE	0.309	0.695	FALSE
Q9D1A2	Cndp2	Cytosolic non-specific dipeptidase		Hydrolyzes a variety of dipeptides including L- carnosine. Has a strong preference for Cys-Gly (By similarity).	Cytoplasm (By similarity).	3D-structure; Carboxypeptidase; Complete proteome; Cytoplasm;Direct protein sequencing; Hydrolase; Manganese; Metal-binding;Metalloprotease; Protease; Reference proteome.	M20_dimer; Peptidase_M20	GO:0005829;GO:0004180;GO:0016805;GO:0046872;GO:0008237;GO:0034701;GO:0006508	0.502	0.193	FALSE	0.173	0.713	FALSE
Q543F3	Cnn2	Calponin;Calponin-2				Complete proteome; Reference proteome.	Calponin; CH	GO:0001725;GO:0031032;GO:0071260;GO:0030097;GO:0030336;GO:0050765;GO:0010628;GO:0032970;GO:0042127;GO:0042060	1.06	0.0899	FALSE	0.641	0.331	FALSE
Q9DAW9	Cnn3	Calponin-3		Thin filament-associated protein that is implicated in the regulation and modulation of smooth muscle contraction. It is capable of binding to actin, calmodulin, troponin C and tropomyosin. The interaction of calponin with actin inhibits the actomyosin Mg-ATPase activity (By similarity).		Acetylation; Actin-binding; Calmodulin-binding; Complete proteome;Reference proteome; Repeat.	Calponin; CH	GO:0031032	-0.861	0.525	FALSE	-0.715	0.648	FALSE
Q6ZQ08	Cnot1	CCR4-NOT transcription complex subunit 1		Scaffolding component of the CCR4-NOT complex which is one of the major cellular mRNA deadenylases and is linked to various cellular processes including bulk mRNA degradation, miRNA- mediated repression, translational repression during translational initiation and general transcription regulation. Additional complex functions may be a consequence of its influence on mRNA expression. Its scaffoldi…	Cytoplasm, P-body. Nucleus (By similarity). Cytoplasm (By similarity). Note=NANOS2 promotes its localization to P-body.	Alternative splicing; Complete proteome; Cytoplasm;Developmental protein; Nucleus; Reference proteome; Repressor;RNA-mediated gene silencing; Transcription; Transcription regulation;Translation regulation.	DUF3819; Not1	GO:0030014;GO:0000932;GO:0005634;GO:0030331;GO:0042974;GO:0031047;GO:0033147;GO:0048387;GO:0000122;GO:0010606;GO:1900153;GO:0060213;GO:2000036;GO:0006417;GO:0006351;GO:0001829	-1.08	0.0823	FALSE	-1.04	0.101	FALSE
Q8BH15-2	Cnot10	CCR4-NOT transcription complex subunit 10		Component of the CCR4-NOT complex which is one of the major cellular mRNA deadenylases and is linked to various cellular processes including bulk mRNA degradation, miRNA-mediated repression, translational repression during translational initiation and general transcription regulation. Additional complex functions may be a consequence of its influence on mRNA expression. Is not required for associ…	Cytoplasm (By similarity). Nucleus (By similarity).	Acetylation; Alternative splicing; Coiled coil; Complete proteome;Cytoplasm; Nucleus; Reference proteome; RNA-mediated gene silencing;Transcription; Transcription regulation; Translation regulation.	TPR_1	GO:0030014;GO:0005737;GO:0005634;GO:0031047;GO:0006355;GO:0006417;GO:0006351	-0.63	0.141	FALSE	-0.747	0.0901	FALSE
Q5CZY5	Cnot2	CCR4-NOT transcription complex subunit 2				Complete proteome; Reference proteome.	NOT2_3_5	GO:0005634;GO:0006355	1.16	0.419	FALSE	1.54	0.323	FALSE
Q8K0V4	Cnot3;mKIAA0691	CCR4-NOT transcription complex subunit 3		Component of the CCR4-NOT complex which is one of the major cellular mRNA deadenylases and is linked to various cellular processes including bulk mRNA degradation, miRNA-mediated repression, translational repression during translational initiation and general transcription regulation. Additional complex functions may be a consequence of its influence on mRNA expression. May be involved in metabol…	Nucleus (Probable). Cytoplasm, P-body. Note=NANOS2 promotes its localization to P-body.	Complete proteome; Cytoplasm; Developmental protein; Nucleus;Phosphoprotein; Reference proteome; Repressor;RNA-mediated gene silencing; Transcription; Transcription regulation;Translation regulation.	NOT2_3_5; Not3	GO:0030014;GO:0000932;GO:0005634;GO:0031047;GO:0033147;GO:2000036;GO:0006355;GO:0006417;GO:0006351;GO:0001829	-0.0544	0.944	FALSE	-0.831	0.245	FALSE
Q3TMD4	Cnot4	CCR4-NOT transcription complex subunit 4				Complete proteome; Metal-binding; Reference proteome; RNA-binding;Zinc; Zinc-finger.		GO:0000166;GO:0003723;GO:0008270	-0.796	0.35	FALSE	-0.371	0.722	FALSE
Q3TYL9	Cnp	2,3-cyclic-nucleotide 3-phosphodiesterase		May participate in RNA metabolism in the myelinating cell, CNP is the third most abundant protein in central nervous system myelin.	Membrane; Lipid-anchor. Melanosome (By similarity). Note=Firmly bound to membrane structures of brain white matter.	3D-structure; Alternative splicing; Complete proteome;Direct protein sequencing; Hydrolase; Lipoprotein; Membrane;Methylation; Phosphoprotein; Prenylation; Reference proteome;RNA-binding.	CNPase	GO:0005615;GO:0042470;GO:0016020;GO:0005874;GO:0005902;GO:0005743;GO:0005741;GO:0035748;GO:0035749;GO:0048471;GO:0005886;GO:0031143;GO:0004113;GO:0030551;GO:0003723;GO:0008344;GO:0007568;GO:0007409;GO:0009214;GO:0030900;GO:0000226;GO:0046902;GO:0032496;GO:0009636	0.264	0.837	FALSE	-0.133	0.938	FALSE
Q9QXT0	Cnpy2	Protein canopy homolog 2	Yes	Positive regulator of neurite outgrowth by stabilizing myosin regulatory light chain (MRLC). It prevents MIR-mediated MRLC ubiquitination and its subsequent proteasomal degradation (By similarity).	Endoplasmic reticulum (Potential).	Complete proteome; Disulfide bond; Endoplasmic reticulum;Phosphoprotein; Reference proteome; Signal.	DUF3456	GO:0005783;GO:0010629;GO:0045716;GO:0010988	1.68	0.111	FALSE	1.92	0.0771	FALSE
Q921H9	Coa7	Cytochrome c oxidase assembly factor 7		Required for assembly of mitochondrial respiratory chain complex I and complex IV (By similarity).	Mitochondrion intermembrane space (By similarity).	Acetylation; Complete proteome; Mitochondrion; Reference proteome;Repeat.	Sel1		0.451	0.462	FALSE	0.778	0.222	FALSE
B1AZ15	Cobll1	Cordon-bleu protein-like 1				Complete proteome; Reference proteome.	Cobl		5.24	0.0381	TRUE	-0.59	0.854	FALSE
Q8C0L8	Cog5	Conserved oligomeric Golgi complex subunit 5		Required for normal Golgi function (By similarity).	Cytoplasm, cytosol (By similarity). Golgi apparatus membrane; Peripheral membrane protein (By similarity).	Complete proteome; Cytoplasm; Golgi apparatus; Membrane;Phosphoprotein; Protein transport; Reference proteome; Transport.		GO:0005829;GO:0000139;GO:0017119;GO:0005634;GO:0006891;GO:0015031	-0.352	0.749	FALSE	-0.764	0.484	FALSE
Q8BSX8	Col4a3bp	Collagen type IV alpha-3-binding protein		Shelters ceramides and diacylglycerol lipids inside its START domain and mediates the intracellular trafficking of ceramides and diacylglycerol lipids in a non-vesicular manner (By similarity).	Cytoplasm (By similarity). Golgi apparatus (By similarity). Endoplasmic reticulum (By similarity). Note=Preferentially localized to the Golgi apparatus (By similarity).	Alternative splicing; Coiled coil; Complete proteome; Cytoplasm;Endoplasmic reticulum; Golgi apparatus; Lipid transport;Lipid-binding; Phosphoprotein; Reference proteome; Transport.	PH; START	GO:0005829;GO:0005783;GO:0005794;GO:0005739;GO:0005634;GO:0048471;GO:0097001;GO:0035620;GO:0016301;GO:0070273;GO:0000902;GO:0008283;GO:0006672;GO:0007029;GO:0035621;GO:0003007;GO:0001701;GO:0055088;GO:0070584;GO:0006936;GO:0034976;GO:0007165	-2.34	0.00278	TRUE	-1.53	0.0282	TRUE
Q3UGT3	Commd1;Gm28048	COMM domain-containing protein 1				Complete proteome; Reference proteome.	HCaRG	GO:0006878;GO:0032088	-2.06	0.0418	TRUE	-0.385	0.743	FALSE
Q63829	Commd3	COMM domain-containing protein 3		May down-regulate activation of NF-kappa-B (By similarity).		Complete proteome; Reference proteome.	HCaRG		-1.37	0.161	FALSE	-1.29	0.204	FALSE
B7ZNP3	Commd6	COMM domain-containing protein 6				Complete proteome; Reference proteome.	HCaRG		0.546	0.625	FALSE	-0.0425	0.984	FALSE
O88587-2	Comt	Catechol O-methyltransferase				Complete proteome; Reference proteome.	Methyltransf_3	GO:0016020;GO:0005739;GO:0016206;GO:0016036;GO:0042420;GO:0008210;GO:0007565;GO:0007612;GO:0048609;GO:0045963;GO:0048662;GO:0050668;GO:0042493;GO:0032496;GO:0014070;GO:0048265	-1.64	0.143	FALSE	-0.0175	0.995	FALSE
Q8BTF0	Copa	Coatomer subunit alpha;Xenin;Proxenin	Yes			Complete proteome; Reference proteome.			-0.473	0.36	FALSE	-0.6	0.283	FALSE
Q9JIF7	Copb1	Coatomer subunit beta		The coatomer is a cytosolic protein complex that binds to dilysine motifs and reversibly associates with Golgi non- clathrin-coated vesicles, which further mediate biosynthetic protein transport from the ER, via the Golgi up to the trans Golgi network. Coatomer complex is required for budding from Golgi membranes, and is essential for the retrograde Golgi-to-ER transport of dilysine-tagged protei…	Cytoplasm (By similarity). Golgi apparatus membrane; Peripheral membrane protein; Cytoplasmic side (By similarity). Cytoplasmic vesicle, COPI-coated vesicle membrane; Peripheral membrane protein; Cytoplasmic side. Cell membrane (By similarity). Endoplasmic reticulum-Golgi intermediate compartment (By similarity). Note=The coatomer is cytoplasmic or polymerized on the cytoplasmic side of the Golgi…	Acetylation; Cell membrane; Complete proteome; Cytoplasm;Cytoplasmic vesicle; ER-Golgi transport; Golgi apparatus; Membrane;Protein transport; Reference proteome; Repeat; Transport.	Adaptin_N; Coatamer_beta_C	GO:0030126;GO:0030137;GO:0005793;GO:0005886;GO:0005198;GO:0006891;GO:0006886	-1.03	0.141	FALSE	-0.638	0.391	FALSE
O55029	Copb2	Coatomer subunit beta		The coatomer is a cytosolic protein complex that binds to dilysine motifs and reversibly associates with Golgi non- clathrin-coated vesicles, which further mediate biosynthetic protein transport from the ER, via the Golgi up to the trans Golgi network. Coatomer complex is required for budding from Golgi membranes, and is essential for the retrograde Golgi-to-ER transport of dilysine-tagged protei…	Cytoplasm, cytosol. Golgi apparatus membrane; Peripheral membrane protein; Cytoplasmic side (By similarity). Cytoplasmic vesicle, COPI-coated vesicle membrane; Peripheral membrane protein; Cytoplasmic side (By similarity). Note=The coatomer is cytoplasmic or polymerized on the cytoplasmic side of the Golgi, as well as on the vesicles/buds originating from it (By similarity). Shows only a slight p…	Acetylation; Coiled coil; Complete proteome; Cytoplasm;Cytoplasmic vesicle; ER-Golgi transport; Golgi apparatus; Membrane;Phosphoprotein; Protein transport; Reference proteome; Repeat;Transport; WD repeat.	Coatomer_WDAD; WD40	GO:0015629;GO:0030126;GO:0005794;GO:0005198;GO:0006891;GO:0006886	-0.656	0.169	FALSE	-0.383	0.469	FALSE
O89079	Cope	Coatomer subunit epsilon		The coatomer is a cytosolic protein complex that binds to dilysine motifs and reversibly associates with Golgi non- clathrin-coated vesicles, which further mediate biosynthetic protein transport from the ER, via the Golgi up to the trans Golgi network. Coatomer complex is required for budding from Golgi membranes, and is essential for the retrograde Golgi-to-ER transport of dilysine-tagged protei…	Cytoplasm (By similarity). Golgi apparatus membrane; Peripheral membrane protein; Cytoplasmic side (By similarity). Cytoplasmic vesicle, COPI-coated vesicle membrane; Peripheral membrane protein; Cytoplasmic side (By similarity). Note=The coatomer is cytoplasmic or polymerized on the cytoplasmic side of the Golgi, as well as on the vesicles/buds originating from it (By similarity).	Complete proteome; Cytoplasm; Cytoplasmic vesicle; ER-Golgi transport;Golgi apparatus; Membrane; Phosphoprotein; Protein transport;Reference proteome; Transport; Ubl conjugation.	Coatomer_E	GO:0030137;GO:0030663;GO:0005198;GO:0015031;GO:0006890	-0.34	0.38	FALSE	-0.522	0.204	FALSE
Q9QZE5	Copg1	Coatomer subunit gamma-1		The coatomer is a cytosolic protein complex that binds to dilysine motifs and reversibly associates with Golgi non- clathrin-coated vesicles, which further mediate biosynthetic protein transport from the ER, via the Golgi up to the trans Golgi network. Coatomer complex is required for budding from Golgi membranes, and is essential for the retrograde Golgi-to-ER transport of dilysine-tagged protei…	Cytoplasm, cytosol. Golgi apparatus membrane; Peripheral membrane protein; Cytoplasmic side. Cytoplasmic vesicle, COPI-coated vesicle membrane; Peripheral membrane protein; Cytoplasmic side (By similarity). Note=The coatomer is cytoplasmic or polymerized on the cytoplasmic side of the Golgi, as well as on the vesicles/buds originating from it (By similarity). Predominantly located in the cis-Golg…	Complete proteome; Cytoplasm; Cytoplasmic vesicle; ER-Golgi transport;Golgi apparatus; Membrane; Protein transport; Reference proteome;Repeat; Transport.	Adaptin_N; COP-gamma_platf	GO:0030126;GO:0005634;GO:0005198;GO:0051683;GO:0006886;GO:0072384;GO:0016192	-0.707	0.301	FALSE	-0.923	0.2	FALSE
Q9QXK3-4	Copg2	Coatomer subunit gamma-2		The coatomer is a cytosolic protein complex that binds to dilysine motifs and reversibly associates with Golgi non- clathrin-coated vesicles, which further mediate biosynthetic protein transport from the ER, via the Golgi up to the trans Golgi network. Coatomer complex is required for budding from Golgi membranes, and is essential for the retrograde Golgi-to-ER transport of dilysine-tagged protei…	Cytoplasm, cytosol. Golgi apparatus membrane; Peripheral membrane protein; Cytoplasmic side (By similarity). Cytoplasmic vesicle, COPI-coated vesicle membrane; Peripheral membrane protein; Cytoplasmic side (By similarity). Note=The coatomer is cytoplasmic or polymerized on the cytoplasmic side of the Golgi, as well as on the vesicles/buds originating from it (By similarity). Tends to be more abun…	Alternative splicing; Complete proteome; Cytoplasm;Cytoplasmic vesicle; ER-Golgi transport; Golgi apparatus; Membrane;Protein transport; Reference proteome; Repeat; Transport.	Adaptin_N; COP-gamma_platf	GO:0030126;GO:0005198;GO:0006886;GO:0016192	-0.0827	0.958	FALSE	-1.75	0.224	FALSE
Q3V3N6	Cops2	COP9 signalosome complex subunit 2				Complete proteome; Reference proteome.	PCI	GO:0008180;GO:0003714;GO:0008283;GO:0045892;GO:0035914	-0.602	0.253	FALSE	-0.863	0.117	FALSE
Q3UQL2	Cops3	COP9 signalosome complex subunit 3				Complete proteome; Reference proteome.		GO:0008180;GO:0001701	-0.419	0.385	FALSE	-0.69	0.178	FALSE
Q14AI7	Cops4	COP9 signalosome complex subunit 4				Complete proteome; Reference proteome.		GO:0008180;GO:0010388	-0.313	0.512	FALSE	-0.27	0.625	FALSE
O35864	Cops5	COP9 signalosome complex subunit 5		Probable protease subunit of the COP9 signalosome complex (CSN), a complex involved in various cellular and developmental processes. The CSN complex is an essential regulator of the ubiquitin (Ubl) conjugation pathway by mediating the deneddylation of the cullin subunits of the SCF-type E3 ligase complexes, leading to decrease the Ubl ligase activity of SCF-type complexes such as SCF, CSA or DDB2…	Cytoplasm. Nucleus. Cytoplasm, perinuclear region (By similarity). Note=Nuclear localization is diminished in the presence of IFIT3 (By similarity).	Acetylation; Complete proteome; Cytoplasm; Direct protein sequencing;Hydrolase; Metal-binding; Metalloprotease; Nucleus; Protease;Reference proteome; Signalosome; Zinc.	JAB	GO:0008180;GO:0048471;GO:0005667;GO:0046872;GO:0008237;GO:0003713;GO:0010388;GO:0045944;GO:0006508;GO:0051726;GO:0046328;GO:0006355	0.273	0.475	FALSE	-0.244	0.577	FALSE
D3Z0F5	Cops6	COP9 signalosome complex subunit 6	Yes			Complete proteome; Reference proteome.	JAB; MitMem_reg	GO:0008180;GO:0010388	-0.805	0.144	FALSE	-0.661	0.252	FALSE
Q9CZ04	Cops7a	COP9 signalosome complex subunit 7a		Component of the COP9 signalosome complex (CSN), a complex involved in various cellular and developmental processes. The CSN complex is an essential regulator of the ubiquitin (Ubl) conjugation pathway by mediating the deneddylation of the cullin subunits of SCF-type E3 ligase complexes, leading to decrease the Ubl ligase activity of SCF-type complexes such as SCF, CSA or DDB2. The complex is als…	Cytoplasm (By similarity). Nucleus (By similarity).	Acetylation; Alternative splicing; Coiled coil; Complete proteome;Cytoplasm; Nucleus; Phosphoprotein; Reference proteome; Signalosome.	PCI	GO:0008180;GO:0005737;GO:0010388	-0.0317	0.939	FALSE	-0.184	0.672	FALSE
Q3TDL0	Cops7b	COP9 signalosome complex subunit 7b		Component of the COP9 signalosome complex (CSN), a complex involved in various cellular and developmental processes. The CSN complex is an essential regulator of the ubiquitin (Ubl) conjugation pathway by mediating the deneddylation of the cullin subunits of SCF-type E3 ligase complexes, leading to decrease the Ubl ligase activity of SCF-type complexes such as SCF, CSA or DDB2. The complex is als…	Cytoplasm (By similarity). Nucleus (By similarity).	Acetylation; Coiled coil; Complete proteome; Cytoplasm; Nucleus;Reference proteome; Signalosome.	PCI	GO:0008180;GO:0005737;GO:0010388	-0.608	0.329	FALSE	-0.703	0.293	FALSE
Q8VBV7	Cops8	COP9 signalosome complex subunit 8		Component of the COP9 signalosome complex (CSN), a complex involved in various cellular and developmental processes. The CSN complex is an essential regulator of the ubiquitin (Ubl) conjugation pathway by mediating the deneddylation of the cullin subunits of SCF-type E3 ligase complexes, leading to decrease the Ubl ligase activity of SCF-type complexes such as SCF, CSA or DDB2. The complex is als…	Cytoplasm (By similarity). Nucleus (By similarity).	Complete proteome; Cytoplasm; Nucleus; Phosphoprotein;Reference proteome; Signalosome.		GO:0008180;GO:0005737;GO:0010388	-0.0331	0.98	FALSE	-0.627	0.634	FALSE
Q542M2	Copz1	Coatomer subunit zeta-1		The coatomer is a cytosolic protein complex that binds to dilysine motifs and reversibly associates with Golgi non- clathrin-coated vesicles, which further mediate biosynthetic protein transport from the ER, via the Golgi up to the trans Golgi network. Coatomer complex is required for budding from Golgi membranes, and is essential for the retrograde Golgi-to-ER transport of dilysine-tagged protei…	Cytoplasm (By similarity). Golgi apparatus membrane; Peripheral membrane protein; Cytoplasmic side (By similarity). Cytoplasmic vesicle, COPI-coated vesicle membrane; Peripheral membrane protein; Cytoplasmic side (By similarity). Note=The coatomer is cytoplasmic or polymerized on the cytoplasmic side of the Golgi, as well as on the vesicles/buds originating from it (By similarity).	Acetylation; Complete proteome; Cytoplasm; Cytoplasmic vesicle;ER-Golgi transport; Golgi apparatus; Membrane; Protein transport;Reference proteome; Transport.	Clat_adaptor_s	GO:0030126;GO:0006891;GO:0006886	-0.0776	0.968	FALSE	0.208	0.931	FALSE
Q3U232	Coro1a	Coronin;Coronin-1A				Complete proteome; Reference proteome; Repeat; WD repeat.	DUF1899; WD40	GO:0005884;GO:0030864;GO:0001772;GO:0030027;GO:0001891;GO:0045335;GO:0051015;GO:0042802;GO:0007015;GO:0006816;GO:0031589;GO:0071353;GO:0048873;GO:0030595;GO:0051126;GO:0001845;GO:0050918;GO:0030335;GO:0042102;GO:0030833;GO:0008360;GO:0043029;GO:0032796	-0.296	0.501	FALSE	-0.29	0.561	FALSE
A2RS22	Coro1b	Coronin;Coronin-1B				Complete proteome; Reference proteome; Repeat; WD repeat.	DUF1899; WD40	GO:0015629;GO:0051015;GO:0030036	-0.231	0.725	FALSE	0.514	0.428	FALSE
Q5PPQ7	Coro1c;Coro6	Coronin;Coronin-1C;Coronin-6				Complete proteome; Reference proteome; Repeat; WD repeat.	DUF1899; DUF1900; WD40	GO:0015629;GO:0051015;GO:0030036	-0.233	0.545	FALSE	-0.173	0.703	FALSE
Q3U4G8	Coro2a	Coronin;Coronin-2A				Complete proteome; Reference proteome; Repeat; WD repeat.	DUF1899; DUF1900; WD40	GO:0015629;GO:0017053;GO:0051015;GO:0030036	1.12	0.415	FALSE	-1.33	0.371	FALSE
Q9D2V7	Coro7	Coronin-7;Coronin		May play a role in the maintenance of the Golgi apparatus morphology and in the protein export from the Golgi (By similarity).	Cytoplasm, cytosol. Golgi apparatus membrane. Cytoplasmic vesicle. Note=Predominantly cytoplasmic. Detected on vesicle-like cytoplasmic structures and on the cis- Golgi. Not associated with actin filaments.	Complete proteome; Cytoplasm; Cytoplasmic vesicle; Golgi apparatus;Membrane; Phosphoprotein; Reference proteome; Repeat; WD repeat.	DUF1900; WD40	GO:0016023;GO:0005829;GO:0005794;GO:0000139;GO:0016021	-0.613	0.0957	FALSE	0.077	0.879	FALSE
Q544F6	Cotl1	Coactosin-like protein		Binds to F-actin in a calcium-independent manner. Has no direct effect on actin depolymerization. Acts as a chaperone for ALOX5 (5LO), influencing both its stability and activity in leukotrienes synthesis (By similarity).	Cytoplasm, cytoskeleton (By similarity). Nucleus membrane; Peripheral membrane protein (By similarity).	3D-structure; Acetylation; Actin-binding; Chaperone;Complete proteome; Cytoplasm; Cytoskeleton; Direct protein sequencing;Membrane; Nucleus; Reference proteome.	Cofilin_ADF	GO:0005737;GO:0005856;GO:0031965;GO:0003779;GO:0050832	0.926	0.053	FALSE	0.587	0.222	FALSE
P12787	Cox5a	Cytochrome c oxidase subunit 5A, mitochondrial		This is the heme A-containing chain of cytochrome c oxidase, the terminal oxidase in mitochondrial electron transport.	Mitochondrion inner membrane.	Acetylation; Complete proteome; Direct protein sequencing; Heme; Iron;Membrane; Metal-binding; Mitochondrion; Mitochondrion inner membrane;Reference proteome; Transit peptide.	COX5A	GO:0005743;GO:0004129;GO:0046872;GO:1902600;GO:0055114	1.15	0.347	FALSE	0.807	0.566	FALSE
Q542E3	Cpa3	Mast cell carboxypeptidase A	Yes		Cytoplasmic vesicle, secretory vesicle. Note=Secretory granules.	Carboxypeptidase; Complete proteome; Cytoplasmic vesicle;Disulfide bond; Hydrolase; Metal-binding; Metalloprotease; Protease;Reference proteome; Signal; Zinc; Zymogen.	Peptidase_M14; Propep_M14	GO:0030133;GO:0004181;GO:0008233;GO:0008270;GO:0006508;GO:0002002	2.11	0.136	FALSE	0.148	0.946	FALSE
Q8C166	Cpne1	Copine-1		May function in membrane trafficking. Exhibits calcium- dependent phospholipid binding properties.		Acetylation; Complete proteome; Reference proteome; Repeat.	C2; Copine	GO:0005634;GO:0001786	-0.839	0.434	FALSE	-1.12	0.333	FALSE
Q3UJS6	Cpne3;Cpne9;Cpne7;Cpne2;Cpne8;Cpne4;Cpne6;Cpne5	Copine-3;Copine-2;Copine-9;Copine-6;Copine-4;Copine-7;Copine-8;Copine-5				Complete proteome; Reference proteome; Repeat.	C2; Copine		-0.199	0.824	FALSE	-0.476	0.599	FALSE
P36552	Cpox	Oxygen-dependent coproporphyrinogen-III oxidase, mitochondrial		Key enzyme in heme biosynthesis. Catalyzes the oxidative decarboxylation of propionic acid side chains of rings A and B of coproporphyrinogen III (By similarity).	Mitochondrion intermembrane space.	Acetylation; Complete proteome; Direct protein sequencing;Heme biosynthesis; Mitochondrion; Oxidoreductase;Porphyrin biosynthesis; Reference proteome; Transit peptide.	Coprogen_oxidas	GO:0005743;GO:0005758;GO:0005739;GO:0004109;GO:0042803;GO:0005391;GO:0005212;GO:0006783;GO:0006782;GO:0046685;GO:0017085;GO:0010039;GO:0010288;GO:0051597	-0.0956	0.849	FALSE	0.3	0.561	FALSE
Q8BFS6	Cpped1	Serine/threonine-protein phosphatase CPPED1		May play an inhibitory role in glucose uptake by adipocytes (By similarity).		Alternative splicing; Complete proteome; Hydrolase; Metal-binding;Reference proteome.	Metallophos	GO:0016787;GO:0046872;GO:0008152	0.162	0.828	FALSE	0.519	0.468	FALSE
Q9WVJ3-2	Cpq	Carboxypeptidase Q	Yes	Carboxypeptidase that may play an important role in the hydrolysis of circulating peptides. Catalyzes the hydrolysis of dipeptides with unsubstituted terminals into amino acids. May play a role in the liberation of thyroxine hormone from its thyroglobulin (Tg) precursor (By similarity).	Endoplasmic reticulum (By similarity). Golgi apparatus (By similarity). Lysosome (By similarity). Secreted (By similarity). Note=Secretion is stimulated by TSH/thyroid- stimulating hormone, INS/insulin and SST/somatostatin (By similarity).	Alternative splicing; Carboxypeptidase; Complete proteome;Endoplasmic reticulum; Glycoprotein; Golgi apparatus; Hydrolase;Lysosome; Metal-binding; Metalloprotease; Protease;Reference proteome; Secreted; Signal; Zinc; Zymogen.	Peptidase_M28	GO:0005783;GO:0005615;GO:0005794;GO:0005764;GO:0004180;GO:0046872;GO:0070573;GO:0042803;GO:0043171;GO:0006508;GO:0006590;GO:0042246	0.522	0.712	FALSE	0.955	0.512	FALSE
Q9EPU4	Cpsf1	Cleavage and polyadenylation specificity factor subunit 1		Component of the cleavage and polyadenylation specificity factor (CPSF) complex that plays a key role in pre- mRNA 3'-end formation, recognizing the AAUAAA signal sequence and interacting with poly(A) polymerase and other factors to bring about cleavage and poly(A) addition. This subunit is involved in the RNA recognition step of the polyadenylation reaction (By similarity).	Nucleus, nucleoplasm (By similarity).	Complete proteome; mRNA processing; Nucleus; Reference proteome;RNA-binding.	CPSF_A	GO:0005847;GO:0003730;GO:0006379;GO:0006378	-1.21	0.141	FALSE	-1.86	0.0336	TRUE
O35218	Cpsf2	Cleavage and polyadenylation specificity factor subunit 2		Component of the cleavage and polyadenylation specificity factor (CPSF) complex that play a key role in pre-mRNA 3'-end formation, recognizing the AAUAAA signal sequence and interacting with poly(A) polymerase and other factors to bring about cleavage and poly(A) addition. Involved in the histone 3' end pre-mRNA processing (By similarity).	Nucleus (Potential).	Complete proteome; mRNA processing; Nucleus; Phosphoprotein;Reference proteome; RNA-binding.	Beta-Casp; CPSF100_C; Lactamase_B; RMMBL	GO:0005847;GO:0016787;GO:0003723;GO:0006398;GO:0006379;GO:0006378	-2.46	0.377	FALSE	-3.33	0.265	FALSE
Q3UDS1	Cpsf3	Cleavage and polyadenylation specificity factor subunit 3		Component of the cleavage and polyadenylation specificity factor (CPSF) complex that play a key role in pre-mRNA 3'-end formation, recognizing the AAUAAA signal sequence and interacting with poly(A) polymerase and other factors to bring about cleavage and poly(A) addition. Has endonuclease activity, and functions as mRNA 3'-end-processing endonuclease. Also involved in the histone 3'-end pre-mRNA…	Nucleus (By similarity).	Acetylation; Complete proteome; Endonuclease; Hydrolase;Isopeptide bond; Metal-binding; mRNA processing; Nuclease; Nucleus;Phosphoprotein; Reference proteome; Ribonucleoprotein; RNA-binding;Ubl conjugation; Zinc.	Beta-Casp; CPSF73-100_C; Lactamase_B; RMMBL	GO:0005847;GO:0030529;GO:0008409;GO:0004521;GO:0046872;GO:0003723;GO:0006398	-0.861	0.405	FALSE	-2.05	0.0609	FALSE
B2LVG5	Cpsf4	Cleavage and polyadenylation specificity factor subunit 4				Complete proteome; Metal-binding; Reference proteome; Zinc;Zinc-finger.	zf-CCCH; zf-CCHC	GO:0003676;GO:0008270	-2.77	0.0574	FALSE	-1.17	0.445	FALSE
H3BJ30	Cpsf6	Cleavage and polyadenylation specificity factor subunit 6				Complete proteome; Reference proteome.		GO:0030529;GO:0003676;GO:0000166	-0.798	0.147	FALSE	-0.769	0.181	FALSE
Q8BTV2-2	Cpsf7	Cleavage and polyadenylation specificity factor subunit 7		Component of the cleavage factor Im complex (CFIm) that plays a key role in pre-mRNA 3'-processing. Binds to cleavage and polyadenylation RNA substrates (By similarity).	Nucleus (By similarity).	Alternative splicing; Complete proteome; mRNA processing; Nucleus;Phosphoprotein; Reference proteome; RNA-binding.	RRM_1	GO:0005849;GO:0000166;GO:0003723;GO:0006397;GO:0051262	-0.556	0.627	FALSE	-0.726	0.561	FALSE
Q64735-2	Cr1l	Complement component receptor 1-like protein	Yes	Acts as a cofactor for complement factor I, a serine protease which protects autologous cells against complement- mediated injury by cleaving C3b and C4b deposited on host tissue. Also acts as a decay-accelerating factor, preventing the formation of C4b2a and C3bBb, the amplification convertases of the complement cascade. Plays a crucial role in early embryonic development by maintaining fetomate…	Membrane; Single-pass type I membrane protein.	3D-structure; Alternative splicing; Complement pathway;Complete proteome; Developmental protein; Disulfide bond;Glycoprotein; Immunity; Innate immunity; Membrane; Phosphoprotein;Pregnancy; Receptor; Reference proteome; Repeat; Signal; Sushi;Transmembrane; Transmembrane helix.	Sushi	GO:0009897;GO:0016021;GO:0043235;GO:0006958;GO:0007565;GO:0001701;GO:0045087;GO:0045916	-0.533	0.469	FALSE	-0.398	0.644	FALSE
Q549T4	Cradd	Death domain-containing protein CRADD		Apoptotic adaptor molecule specific for caspase-2 and FASL/TNF receptor-interacting protein RIP. In the presence of RIP and TRADD, CRADD recruits caspase-2 to the TNFR-1 signalling complex (By similarity).	Cytoplasm. Nucleus.	Apoptosis; Complete proteome; Cytoplasm; Nucleus; Reference proteome.	CARD; Death	GO:0005737;GO:0005634;GO:0006919;GO:0071260;GO:0006977;GO:2001235	-0.154	0.837	FALSE	0.0397	0.969	FALSE
Q62347	Creb1;CREB	Cyclic AMP-responsive element-binding protein 1				Complete proteome; Reference proteome.	bZIP_1; pKID	GO:0005634;GO:0005667;GO:0043565;GO:0003700;GO:0007409;GO:0007595;GO:0060430;GO:0007613;GO:0021983;GO:0046887;GO:0040018;GO:0045672;GO:0045944;GO:0006468;GO:0008361;GO:0042493;GO:0010033;GO:0033363;GO:0060509	1.19	0.0462	TRUE	0.553	0.365	FALSE
O88668	Creg1	Protein CREG1	Yes	May contribute to the transcriptional control of cell growth and differentiation. Antagonizes transcriptional activation and cellular transformation by the adenovirus E1A protein. The transcriptional control activity of cell growth requires interaction with IGF2R (By similarity).	Secreted (By similarity).	Complete proteome; Glycoprotein; Growth regulation;Reference proteome; Secreted; Signal.		GO:0005576;GO:0005667;GO:0010181;GO:0016491;GO:0008134;GO:0040008;GO:0006355	0.996	0.352	FALSE	-2.47	0.033	TRUE
Q9CYA0	Creld2	Cysteine-rich with EGF-like domain protein 2	Yes	May regulate transport of alpha4-beta2 neuronal acetylcholine receptor (By similarity).	Secreted. Endoplasmic reticulum (By similarity).	Calcium; Complete proteome; Disulfide bond; EGF-like domain;Endoplasmic reticulum; Glycoprotein; Reference proteome; Repeat;Secreted; Signal.	DUF3456; EGF_CA	GO:0005783;GO:0005615;GO:0005794;GO:0005509	3.15	0.122	FALSE	2.16	0.323	FALSE
Q8C2N7	Crip1	Cysteine-rich protein 1		Seems to have a role in zinc absorption and may function as an intracellular zinc transport protein.		Acetylation; Complete proteome; LIM domain; Metal-binding;Reference proteome; Zinc.	LIM	GO:0005737;GO:0003680;GO:0008301;GO:0042277;GO:0008270;GO:0071236;GO:0071493;GO:0008630;GO:0010043	2.62	0.0966	FALSE	0.597	0.751	FALSE
Q4FJU3	Crip2	Cysteine-rich protein 2				Acetylation; Complete proteome; LIM domain; Metal-binding;Reference proteome; Repeat; Zinc.	LIM	GO:0005938;GO:0031012;GO:0008270;GO:0030097;GO:0008284	1.9	0.127	FALSE	1.5	0.249	FALSE
Q8JZR2	Crk	Adapter molecule crk				Complete proteome; Reference proteome; SH3 domain.	SH2; SH3_1	GO:0045309	0.719	0.12	FALSE	0.685	0.15	FALSE
A2RS58	Crkl	Crk-like protein		May mediate the transduction of intracellular signals.		Complete proteome; Phosphoprotein; Reference proteome; Repeat;SH2 domain; SH3 domain.	SH2; SH3_1; SH3_2	GO:0009952;GO:0001568;GO:0007507;GO:0009887;GO:0060017;GO:0048538	0.0515	0.884	FALSE	0.068	0.881	FALSE
Q05DC7	Crlf2	Cytokine receptor-like factor 2	Yes	Receptor for thymic stromal lymphopoietin (TSLP). Forms a functional complex with TSLP and IL7R which is capable of stimulating cell proliferation through activation of STAT3 and STAT5. Also activates JAK2. Implicated in the development of the hematopoietic system.	Isoform 2: Secreted.	Alternative splicing; Cell membrane; Complete proteome;Disulfide bond; Glycoprotein; Membrane; Receptor; Reference proteome;Secreted; Signal; Transmembrane; Transmembrane helix.	fn3	GO:0005576;GO:0016021;GO:0005886	-0.00397	0.996	FALSE	-0.733	0.42	FALSE
Q9Z2L7-2	Crlf3	Cytokine receptor-like factor 3				Complete proteome; Reference proteome.			0.00572	0.996	FALSE	-0.895	0.379	FALSE
Q9DC50	Crot	Peroxisomal carnitine O-octanoyltransferase		Beta-oxidation of fatty acids. The highest activity concerns the C6 to C10 chain length substrate.	Peroxisome (Potential).	3D-structure; Acetylation; Acyltransferase; Complete proteome;Fatty acid metabolism; Lipid metabolism; Peroxisome;Reference proteome; Transferase; Transport.	Carn_acyltransf	GO:0005739;GO:0005777;GO:0008458;GO:0009437;GO:0015936;GO:0006635;GO:0006631;GO:0015908;GO:0006091;GO:0051791	0.249	0.58	FALSE	0.323	0.51	FALSE
A7VMV2	Cryl1	Lambda-crystallin homolog			Cytoplasm (By similarity).	Complete proteome; Cytoplasm; NAD; Oxidoreductase; Reference proteome.	3HCDH; 3HCDH_N	GO:0005829;GO:0003857;GO:0050104;GO:0070403;GO:0006631	-0.661	0.567	FALSE	0.858	0.498	FALSE
Q921W4	Cryzl1	Quinone oxidoreductase-like protein 1				Alternative splicing; Complete proteome; NADP; Oxidoreductase;Reference proteome.	ADH_N; ADH_zinc_N	GO:0005829;GO:0016491;GO:0008270	0.356	0.763	FALSE	-0.789	0.502	FALSE
Q9CZU6	Cs;Csl	Citrate synthase, mitochondrial;Citrate synthase			Mitochondrion matrix (By similarity).	Acetylation; Complete proteome; Direct protein sequencing;Methylation; Mitochondrion; Reference proteome; Transferase;Transit peptide; Tricarboxylic acid cycle.	Citrate_synt	GO:0005759;GO:0004108;GO:0005975;GO:0044262;GO:0006099	0.847	0.0608	FALSE	0.641	0.161	FALSE
Q3U1S6	Csde1	Cold shock domain-containing protein E1		RNA-binding protein. May be involved in translationally coupled mRNA turnover. Implicated with other RNA-binding proteins in the cytoplasmic deadenylation/translational and decay interplay of the FOS mRNA mediated by the major coding-region determinant of instability (mCRD) domain (By similarity).	Cytoplasm (By similarity).	Acetylation; Complete proteome; Cytoplasm; Phosphoprotein;Reference proteome; Repeat; RNA-binding.	CSD; SUZ-C	GO:0070937;GO:0005743;GO:0003677;GO:0003723;GO:0070966;GO:0006355	-0.554	0.26	FALSE	-0.349	0.537	FALSE
Q9ERK4	Cse1l	Exportin-2		Export receptor for importin-alpha. Mediates importin- alpha re-export from the nucleus to the cytoplasm after import substrates (cargos) have been released into the nucleoplasm. In the nucleus binds cooperatively to importin-alpha and to the GTPase Ran in its active GTP-bound form. Docking of this trimeric complex to the nuclear pore complex (NPC) is mediated through binding to nucleoporins. Upo…	Cytoplasm. Nucleus. Note=Shuttles between the nucleus and the cytoplasm (By similarity).	Acetylation; Complete proteome; Cytoplasm; Nucleus; Protein transport;Reference proteome; Transport.	CAS_CSE1; Cse1; IBN_N	GO:0005737;GO:0005634;GO:0006886	-0.483	0.357	FALSE	0.214	0.742	FALSE
Q5SX78	Csf2	Granulocyte-macrophage colony-stimulating factor	Yes	Cytokine that stimulates the growth and differentiation of hematopoietic precursor cells from various lineages, including granulocytes, macrophages, eosinophils and erythrocytes.	Secreted.	Complete proteome; Cytokine; Direct protein sequencing;Disulfide bond; Glycoprotein; Growth factor; Reference proteome;Secreted; Signal.	GM_CSF	GO:0005615;GO:0005125;GO:0071222;GO:0001892;GO:0042045;GO:0006955;GO:0042116;GO:0043011;GO:0045918;GO:2001240;GO:0008284;GO:0045740;GO:0010628;GO:0032747;GO:0010744;GO:0071803;GO:0042523;GO:0010468	-4.51	0.00083	TRUE	-4.82	0.000905	TRUE
P41241	Csk	Tyrosine-protein kinase CSK;Non-specific protein-tyrosine kinase		Non-receptor tyrosine-protein kinase that plays an important role in the regulation of cell growth, differentiation, migration and immune response. Phosphorylates tyrosine residues located in the C-terminal tails of Src-family kinases (SFKs) including LCK, SRC, HCK, FYN, LYN or YES1. Upon tail phosphorylation, Src-family members engage in intramolecular interactions between the phosphotyrosine ta…	Cytoplasm. Cell membrane. Note=Mainly cytoplasmic, also present in lipid rafts.	3D-structure; Acetylation; Adaptive immunity; ATP-binding;Cell membrane; Complete proteome; Cytoplasm;Direct protein sequencing; Immunity; Kinase; Membrane;Nucleotide-binding; Phosphoprotein; Reference proteome; SH2 domain;SH3 domain; Transferase; Tyrosine-protein kinase.	Pkinase_Tyr; SH2; SH3_1	GO:0005911;GO:0005813;GO:0005794;GO:0045121;GO:0005886;GO:0005524;GO:0004715;GO:0004713;GO:0034332;GO:0007420;GO:0071375;GO:0002376;GO:0035556;GO:0045779;GO:0008285;GO:0070373;GO:0042997;GO:0032715;GO:0033673;GO:0010989;GO:0050765;GO:0048709;GO:0043406;GO:0046777;GO:0060368;GO:0050863	-0.116	0.839	FALSE	-0.0827	0.911	FALSE
E9Q4G7	Csnk1a1	Casein kinase I isoform alpha				ATP-binding; Complete proteome; Kinase; Nucleotide-binding;Reference proteome; Serine/threonine-protein kinase; Transferase.	Pkinase	GO:0030529;GO:0005524;GO:0004674;GO:0000902	-2.14	0.0607	FALSE	-1.92	0.097	FALSE
A0A0U1RPD7	Csnk1g1;Csnk1g2;Csnk1g3	Casein kinase I isoform gamma-1;Casein kinase I isoform gamma-2;Casein kinase I isoform gamma-3				ATP-binding; Complete proteome; Kinase; Nucleotide-binding;Reference proteome; Serine/threonine-protein kinase; Transferase.	CK1gamma_C; Pkinase	GO:0005737;GO:0005524;GO:0000287;GO:0042277;GO:0004674;GO:0046777	0.049	0.965	FALSE	-0.777	0.445	FALSE
Q61177	Csnk2a1	Casein kinase II subunit alpha				ATP-binding; Complete proteome; Kinase; Nucleotide-binding;Reference proteome; Serine/threonine-protein kinase; Transferase.	Pkinase	GO:0005956;GO:0005524;GO:0008013;GO:0016301;GO:0019888;GO:0004674;GO:0046777	-0.272	0.477	FALSE	-0.391	0.339	FALSE
Q545V8	Csnk2a2	Casein kinase II subunit alpha		Catalytic subunit of a constitutively active serine/threonine-protein kinase complex that phosphorylates a large number of substrates containing acidic residues C-terminal to the phosphorylated serine or threonine. Regulates numerous cellular processes, such as cell cycle progression, apoptosis and transcription, as well as viral infection. May act as a regulatory node which integrates and coordi…		Acetylation; Apoptosis; ATP-binding; Cell cycle; Complete proteome;Kinase; Nucleotide-binding; Phosphoprotein; Reference proteome;Serine/threonine-protein kinase; Transcription;Transcription regulation; Transferase; Wnt signaling pathway.	Pkinase	GO:0031519;GO:0005956;GO:0005524;GO:0004674;GO:0006915;GO:0071174;GO:0006355;GO:0006351;GO:0016055	-0.272	0.809	FALSE	-0.119	0.936	FALSE
N0E4C0	Csnk2b;Csnk2b-Ly6g5b	Casein kinase II subunit beta				Complete proteome; Reference proteome.	CK_II_beta	GO:0005956;GO:0019887;GO:0045859	-0.0506	0.912	FALSE	-0.0601	0.92	FALSE
Q4FJX4	Csrp1	Cysteine and glycine-rich protein 1		Could play a role in neuronal development (By similarity).	Nucleus (By similarity).	Acetylation; Complete proteome; Direct protein sequencing; LIM domain;Metal-binding; Nucleus; Phosphoprotein; Reference proteome; Repeat;Zinc.	LIM	GO:0015629;GO:0005634;GO:0008270;GO:0030036	0.0847	0.879	FALSE	0.344	0.548	FALSE
Q3U5K7	Cst3	Cystatin-C	Yes			Complete proteome; Protease inhibitor; Reference proteome;Thiol protease inhibitor.	Cystatin	GO:0005604;GO:0042995;GO:0043292;GO:0005783;GO:0005615;GO:0005764;GO:0005771;GO:0043025;GO:0031965;GO:0048471;GO:0031982;GO:0001540;GO:0004869;GO:0006915;GO:0007420;GO:0001775;GO:0070301;GO:0042747;GO:0006952;GO:0007566;GO:0043206;GO:0001654;GO:0060313;GO:0060548;GO:0010711;GO:0060311;GO:0010716;GO:0008284;GO:0045740;GO:0043067;GO:0048678;GO:0009743;GO:0042493;GO:0032355;GO:0001666;GO:0031667;GO:…	2.27	0.013	TRUE	2.41	0.00909	TRUE
Q3TCR2	Cst7	Cystatin-F	Yes	Inhibits papain and cathepsin L but with affinities lower than other cystatins. May play a role in immune regulation through inhibition of a unique target in the hematopoietic system.	Secreted (Probable).	Complete proteome; Disulfide bond; Glycoprotein; Protease inhibitor;Reference proteome; Secreted; Signal; Thiol protease inhibitor.	Cystatin	GO:0005576;GO:0004869;GO:0010951	0.868	0.518	FALSE	0.526	0.746	FALSE
Q62426	Cstb	Cystatin-B		This is an intracellular thiol proteinase inhibitor.	Cytoplasm.	Acetylation; Complete proteome; Cytoplasm; Protease inhibitor;Reference proteome; Thiol protease inhibitor.	Cystatin	GO:0005737;GO:0005730;GO:0004869;GO:0008344;GO:0010951;GO:0042981	-0.138	0.833	FALSE	-0.461	0.469	FALSE
Q99LC2	Cstf1	Cleavage stimulation factor subunit 1		One of the multiple factors required for polyadenylation and 3'-end cleavage of mammalian pre-mRNAs. May be responsible for the interaction of CSTF with other factors to form a stable complex on the pre-mRNA (By similarity).	Nucleus (By similarity).	Complete proteome; mRNA processing; Nucleus; Reference proteome;Repeat; WD repeat.	WD40	GO:0005634;GO:0006397	-1.19	0.302	FALSE	-0.0864	0.959	FALSE
Q8BIQ5	Cstf2	Cleavage stimulation factor subunit 2		One of the multiple factors required for polyadenylation and 3'-end cleavage of mammalian pre-mRNAs. This subunit is directly involved in the binding to pre-mRNAs (By similarity).	Nucleus. Note=Localized with DDX1 in cleavage bodies (By similarity).	Alternative splicing; Complete proteome; mRNA processing; Nucleus;Phosphoprotein; Reference proteome; Repeat; RNA-binding.	CSTF2_hinge; CSTF_C; RRM_1	GO:0071920;GO:0005847;GO:0000166;GO:0003723;GO:0006397	0.68	0.244	FALSE	0.0644	0.942	FALSE
Q99LI7	Cstf3	Cleavage stimulation factor subunit 3		One of the multiple factors required for polyadenylation and 3'-end cleavage of mammalian pre-mRNAs (By similarity).	Nucleus (By similarity).	3D-structure; Acetylation; Complete proteome; mRNA processing;Nucleus; Phosphoprotein; Reference proteome; Repeat.	Suf	GO:0005634;GO:0006397	-1.16	0.163	FALSE	-0.391	0.696	FALSE
A0A0J9YU62	Ctbp1;Ctbp2	C-terminal-binding protein 1;C-terminal-binding protein 2				Complete proteome; Reference proteome.	2-Hacid_dh; 2-Hacid_dh_C	GO:0045202;GO:0051287;GO:0016616;GO:0003714;GO:0045892	-0.932	0.226	FALSE	-0.752	0.361	FALSE
Q3USR8	Ctcf	Transcriptional repressor CTCF		Chromatin binding factor that binds to DNA sequence specific sites. Involved in transcriptional regulation by binding to chromatin insulators and preventing interaction between promoter and nearby enhancers and silencers. Acts as transcriptional repressor binding to promoters of vertebrate MYC gene and BAG1 gene. Also binds to the PLK and PIM1 promoters. Acts as a transcriptional activator of APP…	Nucleus, nucleoplasm (Probable). Chromosome (By similarity). Chromosome, centromere (By similarity). Note=May translocate to the nucleolus upon cell differentiation. Associates with both centromeres and chromosomal arms during metaphase. Associates with the H19 ICR in mitotic chromosomes. May be preferentially excluded from heterochromatin during interphase (By similarity).	Acetylation; Activator; Centromere; Chromatin regulator; Chromosome;Chromosome partition; Complete proteome; DNA-binding; Isopeptide bond;Metal-binding; Nucleus; Phosphoprotein; Reference proteome; Repeat;Repressor; Transcription; Transcription regulation; Tumor suppressor;Ubl conjugation; Zinc; Zinc-finger.	zf-C2H2	GO:0000775;GO:0000793;GO:0005730;GO:0005654;GO:0005634;GO:0043035;GO:0003677;GO:0046872;GO:0043565;GO:0003700;GO:0044212;GO:0016568;GO:0007059;GO:0009048;GO:0010216;GO:0010629;GO:0045892;GO:0016584;GO:0010628;GO:0045893;GO:0006349;GO:0035065;GO:0031060;GO:0040030;GO:0006355;GO:0006351	-1.25	0.0957	FALSE	-1.44	0.0614	FALSE
Q3U0S4	Ctdp1	RNA polymerase II subunit A C-terminal domain phosphatase				Complete proteome; Reference proteome.	FCP1_C		-0.0572	0.929	FALSE	-0.137	0.858	FALSE
Q8VCN5	Cth	Cystathionine gamma-lyase		Catalyzes the last step in the trans-sulfuration pathway from methionine to cysteine. Has broad substrate specificity. Converts cystathionine to cysteine, ammonia and 2-oxobutanoate. Converts two cysteine molecules to lanthionine and hydrogen sulfide. Can also accept homocysteine as substrate. Specificity depends on the levels of the endogenous substrates. Generates the endogenous signaling molec…	Cytoplasm (By similarity).	Amino-acid biosynthesis; Calmodulin-binding; Complete proteome;Cysteine biosynthesis; Cytoplasm; Lyase; Pyridoxal phosphate;Reference proteome.	Cys_Met_Meta_PP	GO:0005737;GO:0005634;GO:0004123;GO:0080146;GO:0044540;GO:0030170;GO:0019344;GO:0070814;GO:0043066;GO:2001234;GO:0043123;GO:0051092;GO:0051289;GO:0044524;GO:0018272	1.43	0.0418	TRUE	0.0998	0.917	FALSE
P12399	Ctla2a;Ctla2b	Protein CTLA-2-alpha;Protein CTLA-2-beta	Yes	Not known, expressed in activated T-cell.	Secreted (Potential).	Complete proteome; Reference proteome; Repeat; Secreted; Signal.	Inhibitor_I29	GO:0030425;GO:0005576;GO:0008234;GO:0008152;GO:0050728;GO:0010955;GO:0045589	3.5	0.00334	TRUE	1.98	0.0574	FALSE
Q3UJX2	Ctnnbl1	Beta-catenin-like protein 1		Component of the PRP19-CDC5L complex that forms an integral part of the spliceosome and is required for activating pre-mRNA splicing. May induce apoptosis (By similarity). Participates in AID/AICDA-mediated Ig class switching recombination (CSR).	Nucleus (By similarity).	Acetylation; Apoptosis; Complete proteome; Nucleus; Phosphoprotein;Reference proteome.	CTNNBL	GO:0000974;GO:0005681;GO:0006915;GO:0043065;GO:0016445	-0.285	0.535	FALSE	0.182	0.742	FALSE
P70698	Ctps1;Ctps	CTP synthase 1		Catalyzes the ATP-dependent amination of UTP to CTP with either L-glutamine or ammonia as the source of nitrogen.		Acetylation; ATP-binding; Complete proteome;Glutamine amidotransferase; Ligase; Nucleotide-binding;Phosphoprotein; Pyrimidine biosynthesis; Reference proteome.	CTP_synth_N; GATase	GO:0005524;GO:0003883;GO:0044210;GO:0006541	-0.789	0.502	FALSE	-0.637	0.644	FALSE
P70303	Ctps2	CTP synthase 2		Catalyzes the ATP-dependent amination of UTP to CTP with either L-glutamine or ammonia as the source of nitrogen. Constitutes the rate-limiting enzyme in the synthesis of cytosine nucleotides (By similarity).		Alternative splicing; ATP-binding; Complete proteome;Glutamine amidotransferase; Ligase; Nucleotide-binding;Phosphoprotein; Pyrimidine biosynthesis; Reference proteome.	CTP_synth_N; GATase	GO:0005739;GO:0005524;GO:0003883;GO:0044210;GO:0006541	-0.727	0.144	FALSE	-0.372	0.504	FALSE
Q05CJ7	Ctr9	RNA polymerase-associated protein CTR9 homolog		Component of the PAF1 complex (PAF1C) which has multiple functions during transcription by RNA polymerase II and is implicated in regulation of development and maintenance of embryonic stem cell pluripotency. PAF1C associates with RNA polymerase II through interaction with POLR2A CTD non- phosphorylated and 'Ser-2'- and 'Ser-5'-phosphorylated forms and is involved in transcriptional elongation, a…	Nucleus speckle.	Alternative splicing; Complete proteome; Nucleus; Phosphoprotein;Reference proteome; Repeat; TPR repeat; Transcription;Transcription regulation; Wnt signaling pathway.	TPR_1; TPR_2	GO:0016593;GO:0016607;GO:0035327;GO:0042169;GO:0071222;GO:0001711;GO:0033523;GO:0080182;GO:0010390;GO:0070102;GO:0007259;GO:0045638;GO:0000122;GO:0051571;GO:2001162;GO:0032968;GO:0045944;GO:0019827;GO:0006351;GO:0016055	-0.325	0.77	FALSE	-1.75	0.0885	FALSE
Q9D2D1	Ctsa	Carboxypeptidase;Lysosomal protective protein;Lysosomal protective protein 32 kDa chain;Lysosomal protective protein 20 kDa chain	Yes			Complete proteome; Reference proteome.	Peptidase_S10	GO:0005739;GO:0005634;GO:0004185;GO:0006508	-1.8	0.0827	FALSE	-2.06	0.0521	FALSE
Q3TVS6	Ctsb	Cathepsin B;Cathepsin B light chain;Cathepsin B heavy chain	Yes	Thiol protease which is believed to participate in intracellular degradation and turnover of proteins. Has also been implicated in tumor invasion and metastasis.	Lysosome. Melanosome (By similarity). Secreted, extracellular space (By similarity).	Acetylation; Complete proteome; Disulfide bond; Glycoprotein;Hydrolase; Lysosome; Protease; Reference proteome; Secreted; Signal;Thiol protease; Zymogen.	Peptidase_C1; Propeptide_C1	GO:0005615;GO:0005764;GO:0042470;GO:0005739;GO:0005730;GO:0048471;GO:0004197;GO:0097067;GO:0046697;GO:0006508;GO:0050790	0.423	0.662	FALSE	-0.43	0.693	FALSE
Q3U9B7	Ctsc	Dipeptidyl peptidase 1;Dipeptidyl peptidase 1 exclusion domain chain;Dipeptidyl peptidase 1 heavy chain;Dipeptidyl peptidase 1 light chain	Yes			Complete proteome; Reference proteome.	CathepsinC_exc	GO:0008234;GO:0016505;GO:0008152;GO:2001235	-1.49	0.0642	FALSE	-1.39	0.09	FALSE
Q3UCD9	Ctsd	Cathepsin D	Yes			Aspartyl protease; Complete proteome; Hydrolase; Protease;Reference proteome.	Asp	GO:0005764;GO:0005739;GO:0004190;GO:0000045;GO:0006508	-0.481	0.279	FALSE	-1.13	0.0206	TRUE
Q3UBR4	Ctss	Cathepsin S	Yes			Complete proteome; Hydrolase; Protease; Reference proteome;Thiol protease.	Inhibitor_I29; Peptidase_C1	GO:0005764;GO:0016020;GO:0008234;GO:0008233;GO:0002250;GO:0097067;GO:0050729;GO:0006508	-0.868	0.332	FALSE	-1.11	0.233	FALSE
Q8C2M0	Ctsw	Cathepsin W	Yes	May have a specific function in the mechanism or regulation of T-cell cytolytic activity (By similarity).		Complete proteome; Disulfide bond; Glycoprotein; Hydrolase; Protease;Reference proteome; Signal; Thiol protease; Zymogen.	Inhibitor_I29; Peptidase_C1	GO:0008234;GO:0006508	-0.726	0.528	FALSE	-1.51	0.204	FALSE
Q545I6	Ctsz	Cathepsin Z	Yes	Exhibits carboxy-monopeptidase as well as carboxy- dipeptidase activity (By similarity).	Lysosome.	Complete proteome; Disulfide bond; Glycoprotein; Hydrolase; Lysosome;Protease; Reference proteome; Signal; Thiol protease; Zymogen.	Peptidase_C1	GO:0005783;GO:0005615;GO:0005764;GO:0008234;GO:0060441;GO:0006508	-1.43	0.0239	TRUE	-1.06	0.0788	FALSE
G3UXB4	Ctu2	Cytoplasmic tRNA 2-thiolation protein 2		Plays a central role in 2-thiolation of mcm(5)S(2)U at tRNA wobble positions of tRNA(Lys), tRNA(Glu) and tRNA(Gln). May act by forming a heterodimer with CTU1/ATPBD3 that ligates sulfur from thiocarboxylated URM1 onto the uridine of tRNAs at wobble position (By similarity).	Cytoplasm (By similarity).	Complete proteome; Cytoplasm; Reference proteome; tRNA processing.	DUF2392	GO:0005737;GO:0016779;GO:0032447;GO:0034227;GO:0002098	-1.35	0.0689	FALSE	-1.53	0.0446	TRUE
Q3UIA5	Cul1	Cullin-1				Complete proteome; Reference proteome.	Cullin	GO:0019005;GO:0004842;GO:0006915;GO:0008283;GO:0009887;GO:0006513;GO:0006511	-0.794	0.115	FALSE	-0.657	0.208	FALSE
Q571A2	Cul2	Cullin-2				Complete proteome; Reference proteome.	Cullin	GO:0031461;GO:0030163;GO:0006511	-0.851	0.555	FALSE	-0.952	0.557	FALSE
E9PXY1	Cul4b	Cullin-4B				Complete proteome; Reference proteome.	Cullin; Cullin_Nedd8	GO:0031461;GO:1900087;GO:0045732;GO:0006511	-0.833	0.578	FALSE	-2.67	0.0772	FALSE
Q2M4H5	Cul5	Cullin-5				Complete proteome; Reference proteome.	Cullin; Cullin_Nedd8	GO:0031466;GO:0005737;GO:0005634;GO:0005886;GO:0051480;GO:0006970;GO:0006511	-1.86	0.179	FALSE	-1.44	0.334	FALSE
D5MCW4	Cuta	Protein CutA	Yes			Complete proteome; Reference proteome.	CutA1	GO:0016020;GO:0008104;GO:0010038	2.29	0.073	FALSE	0.545	0.716	FALSE
H3BK24	Cux1	Homeobox protein cut-like;Homeobox protein cut-like 1;Protein CASP;One cut domain family member			Nucleus (By similarity).	Complete proteome; DNA-binding; Homeobox; Nucleus; Reference proteome.	CUT; Homeobox	GO:0005737;GO:0005634;GO:0003682;GO:0003677;GO:0001205;GO:0043565;GO:0042491;GO:0001822;GO:0030324;GO:0000122	-0.964	0.37	FALSE	-0.786	0.523	FALSE
Q9JHS9	Cwc15	Spliceosome-associated protein CWC15 homolog		Component of the PRP19-CDC5L complex that forms an integral part of the spliceosome and is required for activating pre-mRNA splicing (By similarity).	Nucleus (By similarity).	Acetylation; Coiled coil; Complete proteome; mRNA processing;mRNA splicing; Nucleus; Phosphoprotein; Reference proteome;Spliceosome.	Cwf_Cwc_15	GO:0005681;GO:0003723;GO:0000398	0.0507	0.967	FALSE	0.394	0.757	FALSE
Q3TKY6	Cwc27	Peptidyl-prolyl cis-trans isomerase CWC27 homolog;Peptidyl-prolyl cis-trans isomerase		PPIases accelerate the folding of proteins (By similarity).		Acetylation; Coiled coil; Complete proteome; Isomerase;Reference proteome; Rotamase.	Pro_isomerase	GO:0071013;GO:0005634;GO:0003755;GO:0006457;GO:0000413	-0.438	0.657	FALSE	-2.38	0.0196	TRUE
Q8CI33	Cwf19l1	CWF19-like protein 1				Alternative splicing; Complete proteome; Reference proteome.	CwfJ_C_1; CwfJ_C_2	GO:0003824;GO:0008152	-1.13	0.232	FALSE	-1.15	0.242	FALSE
G5E850	Cyb5a	Cytochrome b5				Complete proteome; Heme; Iron; Metal-binding; Reference proteome.	Cyt-b5	GO:0016020;GO:0005739;GO:0020037;GO:0046872;GO:0004768;GO:0006631	1.07	0.281	FALSE	0.934	0.385	FALSE
Q56A15	Cycs	Cytochrome c, somatic		Electron carrier protein. The oxidized form of the cytochrome c heme group can accept an electron from the heme group of the cytochrome c1 subunit of cytochrome reductase. Cytochrome c then transfers this electron to the cytochrome oxidase complex, the final protein carrier in the mitochondrial electron-transport chain.	Mitochondrion intermembrane space. Note=Loosely associated with the inner membrane.	Acetylation; Apoptosis; Complete proteome; Direct protein sequencing;Electron transport; Heme; Iron; Metal-binding; Mitochondrion;Phosphoprotein; Reference proteome; Respiratory chain; Transport.	Cytochrom_C	GO:0005758;GO:0070469;GO:0009055;GO:0020037;GO:0005506;GO:0006915;GO:0055114	0.78	0.711	FALSE	0.909	0.694	FALSE
Q7TMB8	Cyfip1	Cytoplasmic FMR1-interacting protein 1		Component of the CYFIP1-EIF4E-FMR1 complex which binds to the mRNA cap and mediates translational repression. In the CYFIP1-EIF4E-FMR1 complex this subunit is an adapter between EIF4E and FMR1. Promotes the translation repression activity of FMR1 in brain probably by mediating its association with EIF4E and mRNA (By similarity). Regulates formation of membrane ruffles and lamellipodia. Plays a ro…	Cytoplasm. Cytoplasm, perinuclear region. Cell projection, lamellipodium. Cell projection, ruffle. Cell junction, synapse, synaptosome. Note=Highly expressed in the perinuclear region. Enriched in synaptosomes, membrane ruffles and at the tips of lamellipodia.	Actin-binding; Alternative splicing; Cell junction; Cell projection;Cell shape; Complete proteome; Cytoplasm; Developmental protein;Differentiation; Neurogenesis; Reference proteome; Synapse;Synaptosome.	FragX_IP	GO:0030054;GO:0030027;GO:0005845;GO:0043005;GO:0048471;GO:0001726;GO:0045202;GO:0051015;GO:0005522;GO:0048365;GO:0048675;GO:0030032;GO:0008360;GO:0031529	-0.196	0.836	FALSE	0.301	0.771	FALSE
Q5SQX6	Cyfip2	Cytoplasmic FMR1-interacting protein 2		Involved in T-cell adhesion and p53-dependent induction of apoptosis (By similarity). Does not bind RNA.	Cytoplasm. Cytoplasm, perinuclear region. Cell junction, synapse, synaptosome. Note=Highly expressed in the perinuclear region. Enriched in synaptosomes.	Acetylation; Apoptosis; Cell adhesion; Cell junction;Complete proteome; Cytoplasm; Reference proteome; RNA editing;Synapse; Synaptosome.	FragX_IP	GO:0030054;GO:0043005;GO:0048471;GO:0045202;GO:0006915;GO:0016337	-0.514	0.514	FALSE	-0.946	0.246	FALSE
G5E8Q4	Cyth3	Cytohesin-3				Complete proteome; Reference proteome.	PH; Sec7	GO:0005737;GO:0005886;GO:0001726;GO:0005086;GO:0005547;GO:0090162;GO:0045785;GO:0032012	0.351	0.761	FALSE	-0.609	0.606	FALSE
Q9D172	D10Jhu81e	ES1 protein homolog, mitochondrial			Mitochondrion (Potential).	Acetylation; Complete proteome; Direct protein sequencing;Mitochondrion; Reference proteome; Transit peptide.	DJ-1_PfpI	GO:0005739	0.727	0.598	FALSE	1.22	0.397	FALSE
Q91UZ6	D17H6S56E-5					Complete proteome; Reference proteome; Viral envelope protein; Virion.	TLV_coat	GO:0019028;GO:0019031;GO:0005198;GO:0019058	1.92	0.00389	TRUE	2.23	0.00106	TRUE
Q8VC30	Dak	Bifunctional ATP-dependent dihydroxyacetone kinase/FAD-AMP lyase (cyclizing);ATP-dependent dihydroxyacetone kinase;FAD-AMP lyase (cyclizing)		Catalyzes both the phosphorylation of dihydroxyacetone and of glyceraldehyde, and the splitting of ribonucleoside diphosphate-X compounds among which FAD is the best substrate (By similarity).		ATP-binding; Cobalt; Complete proteome; FAD; Flavoprotein; Kinase;Lyase; Magnesium; Manganese; Metal-binding; Multifunctional enzyme;Nucleotide-binding; Reference proteome; Transferase.	Dak1; Dak2	GO:0005524;GO:0034012;GO:0004371;GO:0046872;GO:0050354;GO:0006071	-0.462	0.57	FALSE	0.206	0.847	FALSE
Q3TF87	Dars	Aspartate--tRNA ligase, cytoplasmic				Complete proteome; Reference proteome.			-1.18	0.26	FALSE	-1.04	0.361	FALSE
Q3UGB5	Dazap1	DAZ-associated protein 1				Complete proteome; Reference proteome.	RRM_1	GO:0005737;GO:0005634;GO:0000166;GO:0035613;GO:0008283;GO:0001893;GO:0007283	0.112	0.843	FALSE	0.0159	0.988	FALSE
Q548W7	Dbi	Acyl-CoA-binding protein				Complete proteome; Reference proteome.	ACBP	GO:0005739;GO:0000062;GO:0001942;GO:0006641	-4.61	0.000614	TRUE	0.19	0.893	FALSE
Q62418-2	Dbnl	Drebrin-like protein	Yes	Adapter protein that binds F-actin and DNM1, and thereby plays a role in receptor-mediated endocytosis. Plays a role in the reorganization of the actin cytoskeleton, formation of cell projections, such as neurites, in neuron morphogenesis and synapse formation via its interaction with WASL and COBL. Does not bind G- actin and promote actin polymerization by itself. Required for the formation of o…	Cytoplasm, cytoskeleton. Cell projection, lamellipodium. Cell projection, ruffle. Cytoplasm, cell cortex. Cytoplasm, cytosol (By similarity). Cell junction, synapse (By similarity). Cell projection (By similarity). Cell membrane; Peripheral membrane protein; Cytoplasmic side. Cytoplasmic vesicle, clathrin-coated vesicle membrane; Peripheral membrane protein; Cytoplasmic side. Golgi apparatus memb…	Acetylation; Actin-binding; Adaptive immunity; Alternative splicing;Cell junction; Cell membrane; Cell projection; Coiled coil;Complete proteome; Cytoplasm; Cytoplasmic vesicle; Cytoskeleton;Direct protein sequencing; Endocytosis; Golgi apparatus; Immunity;Membrane; Phosphoprotein; Reference proteome; SH3 domain; Synapse;Transport.	Cofilin_ADF; SH3_1	GO:0005938;GO:0030054;GO:0030665;GO:0005829;GO:0030425;GO:0000139;GO:0030027;GO:0005886;GO:0002102;GO:0014069;GO:0001726;GO:0051015;GO:0019904;GO:0006897;GO:0002376;GO:0048812;GO:0071800;GO:0016601;GO:0007416	-0.0728	0.873	FALSE	0.388	0.384	FALSE
Q923B1	Dbr1	Lariat debranching enzyme		Cleaves the 2'-5' phosphodiester linkage at the branch point of lariat intron pre-mRNAs after splicing and converts them into linear molecules that are subsequently degraded. It thereby facilitates ribonucleotide turnover. It may also participate in retrovirus replication via an RNA lariat intermediate in cDNA synthesis (By similarity).	Nucleus (Probable).	Acetylation; Complete proteome; Hydrolase; Metal-binding;mRNA processing; Nucleus; Phosphoprotein; Reference proteome.	DBR1; Metallophos	GO:0005634;GO:0046872;GO:0008419;GO:0000398	-1.22	0.0643	FALSE	-1.01	0.131	FALSE
Q3UV57	Dcaf5	DDB1- and CUL4-associated factor 5		May function as a substrate receptor for CUL4-DDB1 E3 ubiquitin-protein ligase complex (By similarity).		Complete proteome; Reference proteome; Repeat;Ubl conjugation pathway; WD repeat.	WD40	GO:0080008;GO:0005739;GO:0016567	-0.483	0.705	FALSE	-0.607	0.658	FALSE
Q8N7N5	Dcaf8	DDB1- and CUL4-associated factor 8		May function as a substrate receptor for CUL4-DDB1 E3 ubiquitin-protein ligase complex (By similarity).		Alternative splicing; Complete proteome; Methylation; Phosphoprotein;Reference proteome; Repeat; Ubl conjugation pathway; WD repeat.	WD40	GO:0080008;GO:0016567	-0.733	0.663	FALSE	-1.6	0.345	FALSE
Q545E8	Dck	Deoxycytidine kinase		Required for the phosphorylation of the deoxyribonucleosides deoxycytidine (dC), deoxyguanosine (dG) and deoxyadenosine (dA).	Nucleus (By similarity).	ATP-binding; Complete proteome; Kinase; Nucleotide-binding; Nucleus;Phosphoprotein; Reference proteome; Transferase.	dNK	GO:0005634;GO:0005524;GO:0004137;GO:0008144;GO:0016773;GO:0006220	-0.0256	0.954	FALSE	0.0293	0.959	FALSE
Q9DAR7	Dcps	m7GpppX diphosphatase		Decapping scavenger enzyme that catalyzes the cleavage of a residual cap structure following the degradation of mRNAs by the 3'->5' exosome-mediated mRNA decay pathway. Hydrolyzes cap analog structures like 7-methylguanosine nucleoside triphosphate (m7GpppG) with up to 10 nucleotide substrates (small capped oligoribonucleotides) and specifically releases 5'-phosphorylated RNA fragments and 7-meth…	Cytoplasm (By similarity). Nucleus (By similarity). Note=Predominantly localized in the nucleus. Nucleocytoplasmic shuttling protein that can transiently enter the cytoplasm in mammalian cells in a XPO1/CRM1-dependent manner (By similarity).	3D-structure; Acetylation; Complete proteome; Cytoplasm; Hydrolase;mRNA processing; mRNA splicing; Nucleus; Reference proteome.	DcpS	GO:0005737;GO:0005739;GO:0005634;GO:0050072;GO:0000340;GO:0036245;GO:0000290;GO:0045292;GO:0043069	0.152	0.759	FALSE	0.0672	0.915	FALSE
G3UYS1	Dctd	Deoxycytidylate deaminase				Complete proteome; Reference proteome.	dCMP_cyt_deam_1	GO:0016787;GO:0008270;GO:0008152	-0.664	0.441	FALSE	-0.123	0.922	FALSE
Q3T9V8	Dctn1	Dynactin subunit 1				Complete proteome; Reference proteome.	Dynactin	GO:0031252;GO:0005869;GO:0043234;GO:0032402;GO:0010970	-0.242	0.5	FALSE	0.0206	0.969	FALSE
Q3TPZ5	Dctn2	Dynactin subunit 2		Modulates cytoplasmic dynein binding to an organelle, and plays a role in prometaphase chromosome alignment and spindle organization during mitosis. Involved in anchoring microtubules to centrosomes. May play a role in synapse formation during brain development.	Cytoplasm, cytoskeleton, microtubule organizing center, centrosome. Membrane; Peripheral membrane protein (By similarity).	Acetylation; Coiled coil; Complete proteome; Cytoplasm; Cytoskeleton;Direct protein sequencing; Dynein; Membrane; Microtubule;Phosphoprotein; Reference proteome.		GO:0005813;GO:0005737;GO:0005869;GO:0030286;GO:0030426;GO:0000776;GO:0016020;GO:0005874;GO:0031982;GO:0003774;GO:0008283;GO:0032402;GO:0008152;GO:0007067;GO:0007052	0.5	0.227	FALSE	0.573	0.184	FALSE
Q9Z0Y1	Dctn3	Dynactin subunit 3		Together with dynein may be involved in spindle assembly and cytokinesis (By similarity).	Cytoplasm (By similarity). Cytoplasm, cytoskeleton, microtubule organizing center, centrosome (By similarity). Chromosome, centromere, kinetochore (By similarity). Cytoplasm, cytoskeleton, spindle (By similarity). Cleavage furrow (By similarity). Midbody (By similarity). Note=Localizes to punctate cytoplasmic structures and to the centrosome during interphase, and to kinetochores and to spindle p…	Acetylation; Cell cycle; Cell division; Centromere; Chromosome;Coiled coil; Complete proteome; Cytoplasm; Cytoskeleton; Kinetochore;Mitosis; Reference proteome.	Dynactin_p22	GO:0005813;GO:0032154;GO:0000777;GO:0005869;GO:0030496;GO:0048471;GO:0005819;GO:0000910;GO:0007017;GO:0007067	-0.793	0.228	FALSE	0.106	0.912	FALSE
Q3TQY2	Dctn4	Dynactin subunit 4		Could have a dual role in dynein targeting and in ACTR1A/Arp1 subunit of dynactin pointed-end capping. Could be involved in ACTR1A pointed-end binding and in additional roles in linking dynein and dynactin to the cortical cytoskeleton.	Cytoplasm, cytoskeleton (By similarity). Cytoplasm, cytoskeleton, microtubule organizing center, centrosome (By similarity). Cytoplasm, myofibril, sarcomere. Note=Has a punctate cytoplasmic distribution as well as centrosomal distribution typical of dynactin (By similarity). In skeletal muscles, costamere localization requires the presence of ANK2.	Acetylation; Alternative splicing; Coiled coil; Complete proteome;Cytoplasm; Cytoskeleton; Phosphoprotein; Reference proteome.	Dynactin_p62	GO:0005813;GO:0005869;GO:0030017	-0.973	0.381	FALSE	0.265	0.864	FALSE
Q9QY93	Dctpp1	dCTP pyrophosphatase 1		Hydrolyzes deoxynucleoside triphosphates (dNTPs) to the corresponding nucleoside monophosphates. Has a strong preference for modified dCTP. Activity is highest with 5-iodo-dCTP, followed by 5-bromo-dCTP, unmodified dCTP, 5-methyl-dCTP and 5-chloro-dCTP. Hydrolyzes 2-chloro-dATP and 2-hydroxy-dATP with lower efficiency, and has even lower activity with unmodified dATP, dTTP and dUTP (in vitro). Do…	Cytoplasm.	3D-structure; Acetylation; Complete proteome; Cytoplasm; Hydrolase;Magnesium; Metal-binding; Nucleotide-binding; Phosphoprotein;Reference proteome.	MazG	GO:0005829;GO:0047840;GO:0000287;GO:0047429;GO:0032556;GO:0009143;GO:0051289	0.662	0.472	FALSE	0.536	0.614	FALSE
A2AC16	Dcxr	L-xylulose reductase				Complete proteome; Reference proteome.	adh_short	GO:0005903;GO:0005902;GO:0016614;GO:0006739;GO:0005997	0.364	0.718	FALSE	-0.512	0.634	FALSE
Q3U1J4	Ddb1	DNA damage-binding protein 1		Required for DNA repair. Binds to DDB2 to form the UV- damaged DNA-binding protein complex (the UV-DDB complex). The UV- DDB complex may recognize UV-induced DNA damage and recruit proteins of the nucleotide excision repair pathway (the NER pathway) to initiate DNA repair. The UV-DDB complex preferentially binds to cyclobutane pyrimidine dimers (CPD), 6-4 photoproducts (6-4 PP), apurinic sites an…	Cytoplasm (By similarity). Nucleus (By similarity). Note=Primarily cytoplasmic. Translocates to the nucleus following UV irradiation and subsequently accumulates at sites of DNA damage (By similarity).	Acetylation; Complete proteome; Cytoplasm; DNA damage; DNA repair;DNA-binding; Nucleus; Phosphoprotein; Reference proteome;Ubl conjugation; Ubl conjugation pathway.	CPSF_A	GO:0031464;GO:0031465;GO:0005737;GO:0005634;GO:0003677;GO:0000075;GO:0006281;GO:0043161;GO:0042787;GO:0016055	0.0933	0.884	FALSE	-0.185	0.803	FALSE
Q80Y98	Ddhd2	Phospholipase DDHD2		Phospholipase that hydrolyzes preferentially phosphatidic acid, including 1,2-dioleoyl-sn-phosphatidic acid, and phosphatidylethanolamine. Specifically binds to phosphatidylinositol 3-phosphate (PI(3)P), phosphatidylinositol 4- phosphate (PI(4)P), phosphatidylinositol 5-phosphate (PI(5)P) and possibly phosphatidylinositol 4,5-bisphosphate (PI(4,5)P2). May be involved in the maintenance of the end…	Cytoplasm, cytosol (By similarity). Endoplasmic reticulum-Golgi intermediate compartment (By similarity). Golgi apparatus, cis-Golgi network (By similarity). Note=Cycles between the Golgi apparatus and the cytosol. DDHD2 recruitment to the Golgi/endoplasmic reticulum-Golgi intermediate compartment (ERGIC) is regulated by the levels of phosphoinositides, including PI(4)P (By similarity).	Alternative splicing; Complete proteome; Cytoplasm; Golgi apparatus;Hydrolase; Lipid degradation; Lipid metabolism; Reference proteome.	DDHD; SAM_1; WWE	GO:0005813;GO:0005829;GO:0005793;GO:0005794;GO:0016787;GO:0046872;GO:0016042	-0.68	0.481	FALSE	-0.158	0.911	FALSE
A2ADY9	Ddi2	Protein DDI1 homolog 2				Complete proteome; Phosphoprotein; Reference proteome.	Asp_protease; ubiquitin	GO:0004190;GO:0006508	-0.592	0.591	FALSE	0.135	0.931	FALSE
Q3UNI8	Ddt;Gm20441	D-dopachrome decarboxylase				Complete proteome; Reference proteome.	MIF		-0.0547	0.919	FALSE	-0.0243	0.975	FALSE
Q922B8	Ddx1	ATP-dependent RNA helicase DDX1		Acts as an ATP-dependent RNA helicase, able to unwind both RNA-RNA and RNA-DNA duplexes. Possesses 5' single-stranded RNA overhang nuclease activity. Possesses ATPase activity on various RNA, but not DNA polynucleotides. May play a role in RNA clearance at DNA double-strand breaks (DSBs), thereby facilitating the template-guided repair of transcriptionally active regions of the genome. Together w…	Nucleus (By similarity). Cytoplasm (By similarity). Cytoplasmic granule (By similarity). Note=Localized with MBNL1, TIAL1 and YBX1 in stress granules upon stress. Localized with CSTF2 in cleavage bodies. Forms large aggregates called DDX1 bodies. Relocalized into multiple foci (IR-induced foci or IRIF) after IR treatment, a process that depends on the presence of chromosomal DNA and/or RNA-DNA du…	Acetylation; Activator; ATP-binding; Complete proteome; Cytoplasm;DNA-binding; Exonuclease; Helicase; Hydrolase; mRNA processing;Nuclease; Nucleotide-binding; Nucleus; Phosphoprotein;Reference proteome; RNA-binding; Transcription;Transcription regulation.	DEAD; Helicase_C; SPRY	GO:0071920;GO:0010494;GO:0072669;GO:0005524;GO:0008026;GO:0003682;GO:0003677;GO:0033677;GO:0003725;GO:0004527;GO:0004518;GO:0008143;GO:0003712;GO:0032508;GO:0006302;GO:0006397;GO:0007275;GO:0006355;GO:0043330;GO:0009615;GO:0006351	-0.85	0.0395	FALSE	-0.789	0.0539	FALSE
Q3TKX5	Ddx10	Probable ATP-dependent RNA helicase DDX10		Putative ATP-dependent RNA helicase (By similarity).		Acetylation; ATP-binding; Complete proteome; Helicase; Hydrolase;Nucleotide-binding; Phosphoprotein; Reference proteome; RNA-binding.	DEAD; DUF4217; Helicase_C	GO:0005524;GO:0008026;GO:0003723;GO:0006200	-2.72	0.00713	TRUE	-1.25	0.166	FALSE
Q3U741	Ddx17	Probable ATP-dependent RNA helicase DDX17	Yes			ATP-binding; Complete proteome; Helicase; Hydrolase;Nucleotide-binding; Reference proteome.	DEAD; Helicase_C	GO:0005524;GO:0008026;GO:0003676;GO:0006200;GO:0072358;GO:0009791	-0.874	0.115	FALSE	-1.28	0.0315	TRUE
B2RUM8	Ddx18	ATP-dependent RNA helicase DDX18				Complete proteome; Reference proteome.	Helicase_C	GO:0005524;GO:0004386;GO:0003676;GO:0008152	-0.365	0.569	FALSE	-0.491	0.48	FALSE
Q61655	Ddx19a;Ddx19b;Ddx25	ATP-dependent RNA helicase DDX19A;ATP-dependent RNA helicase DDX25		ATP-dependent RNA helicase involved in mRNA export from the nucleus. Rather than unwinding RNA duplexes, DDX19 functions as a remodeler of ribonucleoprotein particles, whereby proteins bound to nuclear mRNA are dissociated and replaced by cytoplasmic mRNA binding proteins (By similarity).	Cytoplasm (By similarity). Nucleus, nuclear pore complex. Nucleus membrane; Peripheral membrane protein; Cytoplasmic side (By similarity). Note=Nuclear pore complex cytoplasmic fibrils.	Acetylation; ATP-binding; Complete proteome; Cytoplasm; Helicase;Hydrolase; Membrane; mRNA transport; Nuclear pore complex;Nucleotide-binding; Nucleus; Protein transport; Reference proteome;RNA-binding; Translocation; Transport.	DEAD; Helicase_C	GO:0005737;GO:0031965;GO:0005643;GO:0005524;GO:0008026;GO:0003723;GO:0006200;GO:0051028;GO:0043065;GO:0015031;GO:0010043	-0.767	0.259	FALSE	-0.596	0.423	FALSE
Q9JJY4	Ddx20	Probable ATP-dependent RNA helicase DDX20	Yes	The SMN complex plays a catalyst role in the assembly of small nuclear ribonucleoproteins (snRNPs), the building blocks of the spliceosome. Thereby, plays an important role in the splicing of cellular pre-mRNAs. Most spliceosomal snRNPs contain a common set of Sm proteins SNRPB, SNRPD1, SNRPD2, SNRPD3, SNRPE, SNRPF and SNRPG that assemble in a heptameric protein ring on the Sm site of the small n…	Cytoplasm. Nucleus, gem. Note=Localized in subnuclear structures next to coiled bodies, called Gemini of Cajal bodies (Gems).	ATP-binding; Complete proteome; Cytoplasm; DNA-binding; Helicase;Hydrolase; mRNA processing; mRNA splicing; Nucleotide-binding;Nucleus; Phosphoprotein; Reference proteome.	DEAD; Helicase_C	GO:0005829;GO:0097504;GO:0032797;GO:0034719;GO:0005681;GO:0017053;GO:0005524;GO:0008026;GO:0003677;GO:0006200;GO:0000122;GO:0048477;GO:0043065;GO:0050810;GO:0000387	-0.0673	0.923	FALSE	0.0214	0.986	FALSE
Q9JIK5	Ddx21	Nucleolar RNA helicase 2		Can unwind double-stranded RNA (helicase) and can fold or introduce a secondary structure to a single-stranded RNA (foldase). Functions as cofactor for JUN-activated transcription (By similarity).	Nucleus, nucleolus.	3D-structure; Acetylation; ATP-binding; Complete proteome; Helicase;Hydrolase; Nucleotide-binding; Nucleus; Phosphoprotein;Reference proteome; Repeat; RNA-binding.	DEAD; GUCT; Helicase_C	GO:0005730;GO:0005524;GO:0008026;GO:0003725;GO:0003724;GO:0006200;GO:0043330;GO:0009615	-0.323	0.456	FALSE	-0.298	0.546	FALSE
D3Z0M9	Ddx23					ATP-binding; Complete proteome; Helicase; Hydrolase;Nucleotide-binding; Reference proteome.	DEAD; Helicase_C	GO:0071013;GO:0005739;GO:0005886;GO:0005682;GO:0005524;GO:0008026;GO:0003676;GO:0006200	-2.82	0.0176	TRUE	-2.39	0.037	TRUE
Q921N6	Ddx27	Probable ATP-dependent RNA helicase DDX27		Probable ATP-dependent RNA helicase.	Nucleus (Potential).	Alternative splicing; ATP-binding; Complete proteome; Helicase;Hydrolase; Nucleotide-binding; Nucleus; Phosphoprotein;Reference proteome.	DEAD; Helicase_C	GO:0005634;GO:0005524;GO:0008026;GO:0003676;GO:0006200	0.273	0.596	FALSE	-0.353	0.532	FALSE
Q3UVN0	Ddx39;Ddx39a	ATP-dependent RNA helicase DDX39A				Complete proteome; Reference proteome.	DEAD	GO:0005524;GO:0008026;GO:0003676;GO:0006200	0.174	0.828	FALSE	-1.33	0.0677	FALSE
Q9Z1N5	Ddx39b	Spliceosome RNA helicase Ddx39b		Involved in nuclear export of spliced and unspliced mRNA. Assembling component of the TREX complex which is thought to couple mRNA transcription, processing and nuclear export, and specifically associates with spliced mRNA and not with unspliced pre-mRNA. TREX is recruited to spliced mRNAs by a transcription- independent mechanism, binds to mRNA upstream of the exon-junction complex (EJC) and is …	Nucleus (By similarity). Nucleus speckle (By similarity). Cytoplasm (By similarity). Note=Can translocate to the cytoplasm in the presence of MX1 (By similarity).	Acetylation; ATP-binding; Complete proteome; Cytoplasm;Direct protein sequencing; Helicase; Hydrolase; mRNA processing;mRNA splicing; mRNA transport; Nucleotide-binding; Nucleus;Phosphoprotein; Reference proteome; RNA-binding; Spliceosome;Transport.	DEAD; Helicase_C	GO:0005737;GO:0016607;GO:0005681;GO:0000346;GO:0005687;GO:0005688;GO:0005524;GO:0004004;GO:0030621;GO:0017070;GO:0006200;GO:2000002;GO:0032786;GO:0010501;GO:0000245;GO:0046784	-0.86	0.264	FALSE	-0.734	0.381	FALSE
B9EKE9	Ddx3x;D1Pas1	ATP-dependent RNA helicase DDX3X;Putative ATP-dependent RNA helicase Pl10		Multifunctional ATP-dependent RNA helicase. The ATPase activity can be stimulated by various ribo- and deoxynucleic acids indicative for a relaxed substrate specificity. In vitro can unwind partially double-stranded DNA with a preference for 5'- single-stranded DNA overhangs. Is involved in several steps of gene expression, such as transcription, mRNA maturation, mRNA export and translation. Howe…	Nucleus speckle (By similarity). Cytoplasm (By similarity). Mitochondrion outer membrane (By similarity). Note=Located predominantly in nuclear speckles and, at low levels, throughout the cytoplasm. Located to the outer side of nuclear pore complexes (NPC). Shuttles between the nucleus and the cytoplasm in a XPO1 and may be also in a NFX1-dependent manner. Associated with polyadenylated mRNAs in …	Acetylation; Apoptosis; ATP-binding; Chromosome partition;Complete proteome; Cytoplasm; Direct protein sequencing; DNA-binding;Helicase; Hydrolase; Immunity; Innate immunity; Membrane;Mitochondrion; Mitochondrion outer membrane; Nucleotide-binding;Nucleus; Phosphoprotein; Reference proteome; Ribosome biogenesis;RNA-binding; Transcription; Transcription regulation;Translation regulation.	DEAD; Helicase_C	GO:0010494;GO:0005741;GO:0016607;GO:0005634;GO:0005524;GO:0004003;GO:0004004;GO:0003677;GO:0008190;GO:0048027;GO:0008143;GO:0043024;GO:0035613;GO:0008134;GO:0071243;GO:0071470;GO:0007059;GO:0008625;GO:0045087;GO:0097193;GO:0042256;GO:0043066;GO:0043154;GO:2001243;GO:0031333;GO:0017148;GO:0043065;GO:0030307;GO:0043280;GO:1900087;GO:0045944;GO:0045948;GO:0009615;GO:0010501;GO:0034063;GO:0006351	-1	0.165	FALSE	-0.929	0.217	FALSE
Q3UAC4	Ddx41	Probable ATP-dependent RNA helicase DDX41		Probable ATP-dependent RNA helicase. Is required during post-transcriptional gene expression. May be involved in pre-mRNA splicing (By similarity).	Nucleus (Potential).	ATP-binding; Complete proteome; Helicase; Hydrolase; Metal-binding;mRNA processing; mRNA splicing; Nucleotide-binding; Nucleus;Phosphoprotein; Reference proteome; RNA-binding; Spliceosome; Zinc;Zinc-finger.	DEAD; Helicase_C	GO:0071013;GO:0005783;GO:0005634;GO:0005524;GO:0008026;GO:0003677;GO:0003723;GO:0008270;GO:0006200;GO:0035458;GO:0051607;GO:0006397;GO:0045944;GO:0008380	-0.563	0.541	FALSE	0.768	0.435	FALSE
Q810A7	Ddx42	ATP-dependent RNA helicase DDX42		ATP-dependent RNA helicase. Binds to partially double- stranded RNAs (dsRNAs) in order to unwind RNA secondary structures. Unwinding is promoted in the presence of single-strand binding proteins. Mediates also RNA duplex formation thereby displacing the single-strand RNA binding protein. ATP and ADP modulate its activity: ATP binding and hydrolysis by DDX42 triggers RNA strand separation, whereas…	Cytoplasm (By similarity). Nucleus speckle (By similarity). Nucleus, Cajal body (By similarity).	Acetylation; Alternative splicing; ATP-binding; Coiled coil;Complete proteome; Cytoplasm; Direct protein sequencing; Helicase;Hydrolase; Nucleotide-binding; Nucleus; Phosphoprotein;Reference proteome; RNA-binding.	DEAD; Helicase_C	GO:0015030;GO:0005737;GO:0016607;GO:0005634;GO:0005524;GO:0008026;GO:0003723;GO:0006200;GO:0008104	-1.6	0.00278	TRUE	-2.09	0.00076	TRUE
Q569Z5	Ddx46	Probable ATP-dependent RNA helicase DDX46		Plays an essential role in splicing, either prior to, or during A complex formation (By similarity).	Nucleus speckle (By similarity). Nucleus, Cajal body (By similarity). Note=Present in Cajal bodies (CBs) and nuclear speckles (By similarity).	Acetylation; Alternative splicing; ATP-binding; Coiled coil;Complete proteome; Helicase; Hydrolase; mRNA processing;mRNA splicing; Nucleotide-binding; Nucleus; Phosphoprotein;Reference proteome; RNA-binding.	DEAD; Helicase_C	GO:0015030;GO:0016607;GO:0005730;GO:0005524;GO:0008026;GO:0003723;GO:0006200;GO:0006397;GO:0008380	-1.16	0.0176	TRUE	-1.54	0.00308	TRUE
Q8BTS0	Ddx5;Hlr1	Probable ATP-dependent RNA helicase DDX5				ATP-binding; Complete proteome; Helicase; Hydrolase;Nucleotide-binding; Reference proteome.	DEAD; Helicase_C; P68HR	GO:0071013;GO:0005730;GO:0005634;GO:0030529;GO:0005524;GO:0004004;GO:0036002;GO:0003713;GO:0003712;GO:0006200;GO:0007623;GO:0001701;GO:0072332;GO:0000122;GO:0043517;GO:0033148;GO:0045944;GO:0045893;GO:0000381;GO:0060765;GO:0045069	-2.03	0.00255	TRUE	-2.01	0.0023	TRUE
A1L0V6	Ddx58	Probable ATP-dependent RNA helicase DDX58				ATP-binding; Complete proteome; Helicase; Hydrolase;Nucleotide-binding; Reference proteome.	DEAD; Helicase_C	GO:0005524;GO:0008026;GO:0003690;GO:0003725;GO:0006200;GO:0043330	-0.388	0.772	FALSE	-1.15	0.364	FALSE
P54823	Ddx6	Probable ATP-dependent RNA helicase DDX6		In the process of mRNA degradation, may play a role in mRNA decapping.	Cytoplasm, P-body (By similarity).	ATP-binding; Complete proteome; Cytoplasm; Helicase; Hydrolase;Nucleotide-binding; Phosphoprotein; Reference proteome; RNA-binding.	DEAD; Helicase_C	GO:0000932;GO:0010494;GO:0016442;GO:0005524;GO:0008026;GO:0003723;GO:0006200;GO:0033962	-0.735	0.225	FALSE	-0.537	0.415	FALSE
A0A0R4IZX1	Def6	Differentially expressed in FDCP 6		Phosphatidylinositol 3,4,5-trisphosphate-dependent guanine nucleotide exchange factor (GEF) which plays a role in the activation of Rho GTPases RAC1, RhoA and CDC42. Can regulate cell morphology in cooperation with activated RAC1. Plays a role in Th2 (T helper cells) development and/or activation, perhaps by interfering with ZAP70 signaling. Required for optimal T-cell effector function, lymphocy…	Cytoplasm. Cell membrane. Nucleus. Note=Recruited to the plasma membrane upon binding phosphatidylinositol 3,4,5-trisphosphate.	Acetylation; Alternative splicing; Cell membrane; Complete proteome;Cytoplasm; Membrane; Nucleus; Phosphoprotein; Reference proteome.	PH	GO:0005737;GO:0005634;GO:0005886	-0.214	0.849	FALSE	0.531	0.655	FALSE
Q7TNV0	Dek	Protein DEK		Involved in chromatin organization.	Nucleus. Note=Enriched in regions where chromatin is decondensed or sparse in the interphase nuclei (By similarity).	Chromatin regulator; Complete proteome; DNA-binding; Nucleus;Phosphoprotein; Reference proteome.	DEK_C; SAP	GO:0005634;GO:0003677;GO:0016568;GO:2001032	-0.938	0.567	FALSE	-2.22	0.184	FALSE
E9Q0G1	Denr	Density-regulated protein				Complete proteome; Reference proteome.	SUI1	GO:0003743	0.83	0.219	FALSE	0.354	0.655	FALSE
Q3THN2	Dera	Deoxyribose-phosphate aldolase		Catalyzes a reversible aldol reaction between acetaldehyde and D-glyceraldehyde 3-phosphate to generate 2-deoxy- D-ribose 5-phosphate (By similarity).		Complete proteome; Lyase; Reference proteome; Schiff base.	DeoC	GO:0005737;GO:0004139;GO:0046121;GO:0009264;GO:0046386	0.294	0.755	FALSE	-1.09	0.209	FALSE
Q8CA98	Dffa	DNA fragmentation factor subunit alpha		Inhibitor of the caspase-activated DNase (DFF40).	Cytoplasm (By similarity).	3D-structure; Acetylation; Alternative splicing; Apoptosis;Complete proteome; Cytoplasm; Reference proteome.	CIDE-N; DFF-C	GO:0005737;GO:0000790;GO:0006309;GO:1902511;GO:1900118;GO:0043065;GO:0070242	-1.23	0.383	FALSE	1.36	0.38	FALSE
A2AHJ7	Dgkz;Dgki	Diacylglycerol kinase;Diacylglycerol kinase zeta				ANK repeat; Complete proteome; Reference proteome; Repeat.	Ank_2; C1_1; DAGK_acc; DAGK_cat	GO:0004143;GO:0004857;GO:0003951;GO:0035556;GO:0046580;GO:0016310;GO:0007205	0.131	0.911	FALSE	0.805	0.498	FALSE
Q8K0E9	Dhdh	Trans-1,2-dihydrobenzene-1,2-diol dehydrogenase				Complete proteome; NADP; Oxidoreductase; Reference proteome.	GFO_IDH_MocA; GFO_IDH_MocA_C	GO:0047837;GO:0047115;GO:0042843	0.79	0.502	FALSE	-0.57	0.685	FALSE
Q544T5	Dhfr	Dihydrofolate reductase		Key enzyme in folate metabolism. Contributes to the de novo mitochondrial thymidylate biosynthesis pathway. Catalyzes an essential reaction for de novo glycine and purine synthesis, and for DNA precursor synthesis. Binds its own mRNA and that of DHFRL1.		3D-structure; Acetylation; Complete proteome;Direct protein sequencing; Methotrexate resistance; NADP;One-carbon metabolism; Oxidoreductase; Reference proteome;RNA-binding.	DHFR_1	GO:0005829;GO:0004146;GO:0051871;GO:0008144;GO:0003729;GO:0050661;GO:0046452;GO:0006545;GO:0009165;GO:0006730;GO:0031427;GO:0035094;GO:0046654;GO:0046653	-0.0463	0.936	FALSE	-0.196	0.744	FALSE
Q3TXU5	Dhps	Deoxyhypusine synthase		Catalyzes the NAD-dependent oxidative cleavage of spermidine and the subsequent transfer of the butylamine moiety of spermidine to the epsilon-amino group of a specific lysine residue of the eIF-5A precursor protein to form the intermediate deoxyhypusine residue (By similarity).		Complete proteome; Hypusine biosynthesis; NAD; Reference proteome;Transferase.	DS	GO:0034038;GO:0050983;GO:0008612;GO:0051289	-0.522	0.515	FALSE	-0.362	0.706	FALSE
Q3UKJ6	Dhx15	Pre-mRNA-splicing factor ATP-dependent RNA helicase DHX15		Pre-mRNA processing factor involved in disassembly of spliceosomes after the release of mature mRNA. In cooperation with TFIP11 seem to be involved in the transition of the U2, U5 and U6 snRNP-containing IL complex to the snRNP-free IS complex leading to efficient debranching and turnover of excised introns (By similarity).	Nucleus. Nucleus, nucleolus (By similarity).	Acetylation; ATP-binding; Complete proteome; Helicase; Hydrolase;mRNA processing; mRNA splicing; Nucleotide-binding; Nucleus;Reference proteome.	DEAD; HA2; Helicase_C; OB_NTP_bind	GO:0005730;GO:0005689;GO:0005524;GO:0008026;GO:0003725;GO:0006200;GO:0006397;GO:0008380	-1.14	0.168	FALSE	-2.24	0.0146	TRUE
Q6PGC1	Dhx29	ATP-dependent RNA helicase Dhx29	Yes	ATP-binding RNA helicase involved in translation initiation. Part of the 43S pre-initiation complex that is required for efficient initiation on mammalian mRNAs with structured 5'-UTRs by promoting efficient NTPase-dependent 48S complex formation. Specifically binds to the 40S ribosome near the mRNA entrance. Does not possess a processive helicase activity (By similarity).	Cytoplasm (By similarity).	ATP-binding; Coiled coil; Complete proteome; Cytoplasm; Helicase;Hydrolase; Initiation factor; Nucleotide-binding; Phosphoprotein;Protein biosynthesis; Reference proteome.	DEAD; HA2; Helicase_C; OB_NTP_bind	GO:0016282;GO:0005739;GO:0005524;GO:0008026;GO:0043024;GO:0003743;GO:0006200	-1.16	0.136	FALSE	-0.862	0.296	FALSE
Q8VHK9	Dhx36	ATP-dependent RNA helicase DHX36		Plays a role in degradation and deadenylation of mRNAs containing in their 3'-UTR the consensus ARE sequence element. May function in sex development and spermatogenesis (By similarity).	Nucleus (By similarity).	Acetylation; ATP-binding; Coiled coil; Complete proteome; Helicase;Hydrolase; Nucleotide-binding; Nucleus; Reference proteome.	DEAD; HA2; Helicase_C; OB_NTP_bind	GO:0005737;GO:0005634;GO:0005524;GO:0008026;GO:0003725;GO:0006200;GO:0043330;GO:0009615	-0.832	0.0426	FALSE	-0.626	0.123	FALSE
A2A4N9	Dhx8	ATP-dependent RNA helicase DHX8	Yes			ATP-binding; Complete proteome; Helicase; Hydrolase;Nucleotide-binding; Reference proteome.	DEAD; HA2; Helicase_C; OB_NTP_bind; S1	GO:0005524;GO:0008026;GO:0003723;GO:0006200	-1.1	0.211	FALSE	0.34	0.751	FALSE
E9QNN1	Dhx9	ATP-dependent RNA helicase A				ATP-binding; Complete proteome; Helicase; Hydrolase;Nucleotide-binding; Reference proteome.	DEAD; dsrm; HA2; Helicase_C; OB_NTP_bind	GO:0005813;GO:0070937;GO:0005730;GO:0030529;GO:0005524;GO:0008026;GO:0003676;GO:0006200;GO:0034605;GO:0007623;GO:0070934	-1.54	0.0353	TRUE	-1.71	0.0206	TRUE
E9PXV7	Diap1;Diaph1	Protein diaphanous homolog 1				Complete proteome; Reference proteome.	Drf_DAD; Drf_FH1; Drf_FH3; Drf_GBD; FH2	GO:0032587;GO:0003779;GO:0005522;GO:0017048;GO:0030041	-0.246	0.614	FALSE	-0.918	0.0609	FALSE
Q8C9B9	Dido1	Death-inducer obliterator 1		Putative transcription factor, weakly pro-apoptotic when overexpressed.	Cytoplasm. Nucleus. Note=Translocates to the nucleus after pro-apoptotic stimuli.	3D-structure; Acetylation; Alternative splicing; Apoptosis;Complete proteome; Cytoplasm; Direct protein sequencing;Metal-binding; Nucleus; Phosphoprotein; Reference proteome; Zinc;Zinc-finger.	PHD; SPOC; TFIIS_M	GO:0005737;GO:0005654;GO:0008270;GO:0097190;GO:0006351	-1.17	0.175	FALSE	-2.63	0.00791	TRUE
A0A0A6YWS6	Diexf	Digestive organ expansion factor homolog		Regulates the p53 pathway to control the expansion growth of digestive organs (By similarity).	Nucleus (By similarity). Nucleus, nucleolus (By similarity).	Complete proteome; Developmental protein; Nucleus; Reference proteome.	DUF1253	GO:0005730;GO:0007275	-1.71	0.0133	TRUE	-1.52	0.023	TRUE
Q3UK38	Dimt1	Probable dimethyladenosine transferase		Specifically dimethylates two adjacent adenosines in the loop of a conserved hairpin near the 3'-end of 18S rRNA in the 40S particle (By similarity).	Nucleus, nucleolus (By similarity).	Complete proteome; Methyltransferase; Nucleus; Reference proteome;RNA-binding; rRNA processing; S-adenosyl-L-methionine; Transferase.	RrnaAD	GO:0005730;GO:0052909;GO:0003723;GO:0000179;GO:0031167	-0.675	0.587	FALSE	-0.29	0.858	FALSE
Q3UH60	Dip2b;Dip2a	Disco-interacting protein 2 homolog B;Disco-interacting protein 2 homolog A				Alternative splicing; Complete proteome; Phosphoprotein;Reference proteome.	AMP-binding; DMAP_binding	GO:0005634;GO:0003824	0.485	0.498	FALSE	0.225	0.806	FALSE
Q9CSH3	Dis3	Exosome complex exonuclease RRP44		Putative catalytic component of the RNA exosome complex which has 3'->5' exoribonuclease activity and participates in a multitude of cellular RNA processing and degradation events. In the nucleus, the RNA exosome complex is involved in proper maturation of stable RNA species such as rRNA, snRNA and snoRNA, in the elimination of RNA processing by-products and non-coding 'pervasive' transcripts, su…	Cytoplasm (By similarity). Nucleus, nucleolus (By similarity). Nucleus, nucleoplasm (By similarity). Nucleus (By similarity).	Acetylation; Complete proteome; Cytoplasm; Endonuclease; Exonuclease;Exosome; Hydrolase; Magnesium; Manganese; Nuclease; Nucleus;Reference proteome; RNA-binding; rRNA processing.	PIN_4	GO:0005737;GO:0000176;GO:0005730;GO:0005654;GO:0000175;GO:0004519;GO:0005085;GO:0003723;GO:0071034;GO:0043087;GO:0016075;GO:0006364	-1.19	0.275	FALSE	-2.41	0.0387	TRUE
Q8CI75	Dis3l2	DIS3-like exonuclease 2		3'-5'-exoribonuclease that specifically recognizes RNAs polyuridylated at their 3' end and mediates their degradation. Component of an exosome-independent RNA degradation pathway that mediates degradation of both mRNAs and miRNAs that have been polyuridylated by a terminal uridylyltransferase, such as ZCCHC11/TUT4. Mediates degradation of cytoplasmic mRNAs that have been deadenylated and subseque…	Cytoplasm. Cytoplasm, P-body (By similarity).	Acetylation; Alternative splicing; Cell cycle; Cell division;Complete proteome; Cytoplasm; Exonuclease; Hydrolase; Magnesium;Manganese; Mitosis; Nuclease; Phosphoprotein; Reference proteome;RNA-binding; Tumor suppressor.		GO:0000932;GO:0000175;GO:0003723;GO:0010587;GO:0051306;GO:0008285;GO:0000291;GO:0034427;GO:1990074;GO:0019827	-0.251	0.828	FALSE	-0.6	0.604	FALSE
Q499D4	Dkc1	H/ACA ribonucleoprotein complex subunit 4				Complete proteome; Reference proteome.	DKCLD	GO:0005730;GO:0009982;GO:0004730;GO:0003723;GO:0030519;GO:0000154	-0.345	0.469	FALSE	-1.21	0.0196	TRUE
O08749	Dld	Dihydrolipoyl dehydrogenase, mitochondrial;Dihydrolipoyl dehydrogenase		Lipoamide dehydrogenase is a component of the glycine cleavage system as well as of the alpha-ketoacid dehydrogenase complexes. Involved in the hyperactivation of spermatazoa during capacitation and in the spermatazoal acrosome reaction.	Mitochondrion matrix.	Acetylation; Complete proteome; Direct protein sequencing;Disulfide bond; FAD; Flavoprotein; Mitochondrion; NAD; Oxidoreductase;Phosphoprotein; Redox-active center; Reference proteome;Transit peptide.	Pyr_redox; Pyr_redox_2; Pyr_redox_dim	GO:0043159;GO:0005929;GO:0005759;GO:0005739;GO:0005634;GO:0004148;GO:0050660;GO:0045454;GO:0007369;GO:0006120;GO:0006508;GO:0042391;GO:0048240	1.16	0.0521	FALSE	1.2	0.0481	TRUE
Q3UP61	Dlg1	Disks large homolog 1				Complete proteome; Reference proteome; SH3 domain.	Guanylate_kin; MAGUK_N_PEST; PDZ; PDZ_assoc; SH3_1	GO:0016323;GO:0030054;GO:0031253;GO:0001772;GO:0016328;GO:0045121;GO:0031594;GO:0014069;GO:0032947;GO:0032147;GO:0042982;GO:0001658;GO:0048704;GO:0060022;GO:0001771;GO:0002088;GO:0031579;GO:0050680;GO:0042130;GO:0030432;GO:0030838;GO:0008284;GO:0008104;GO:0042391;GO:0048608;GO:0048745;GO:0042110;GO:0002369	-0.745	0.311	FALSE	-0.541	0.514	FALSE
Q3UGF9	Dlgap5	Disks large-associated protein 5				Complete proteome; Reference proteome.	GKAP	GO:0007267	0.409	0.77	FALSE	-0.64	0.663	FALSE
Q9D2G2-2	Dlst	Dihydrolipoyllysine-residue succinyltransferase component of 2-oxoglutarate dehydrogenase complex, mitochondrial		The 2-oxoglutarate dehydrogenase complex catalyzes the overall conversion of 2-oxoglutarate to succinyl-CoA and CO(2). It contains multiple copies of 3 enzymatic components: 2-oxoglutarate dehydrogenase (E1), dihydrolipoamide succinyltransferase (E2) and lipoamide dehydrogenase (E3) (By similarity).	Mitochondrion (By similarity).	Acetylation; Acyltransferase; Alternative splicing; Complete proteome;Direct protein sequencing; Lipoyl; Mitochondrion; Reference proteome;Transferase; Transit peptide; Tricarboxylic acid cycle.	2-oxoacid_dh; Biotin_lipoyl	GO:0005739;GO:0005634;GO:0045252;GO:0004149;GO:0033512;GO:0006099	-0.616	0.501	FALSE	0.753	0.449	FALSE
B9EJR8	Dnaaf5	Dynein assembly factor 5, axonemal				Complete proteome; Reference proteome.			-0.988	0.206	FALSE	0.421	0.647	FALSE
Q5NTY0	Dnaja1	DnaJ homolog subfamily A member 1				Chaperone; Complete proteome; Reference proteome.	DnaJ	GO:0050750;GO:0030521;GO:0042769;GO:0030317;GO:0007283	-0.196	0.739	FALSE	-0.793	0.15	FALSE
Q9QYJ0	Dnaja2	DnaJ homolog subfamily A member 2		Co-chaperone of Hsc70 (By similarity).	Membrane; Lipid-anchor (Potential).	Acetylation; Chaperone; Complete proteome; Direct protein sequencing;Lipoprotein; Membrane; Metal-binding; Methylation; Phosphoprotein;Prenylation; Reference proteome; Repeat; Zinc; Zinc-finger.	CTDII; DnaJ; DnaJ_CXXCXGXG	GO:0016020;GO:0005524;GO:0046872;GO:0006457;GO:0009408	-0.263	0.598	FALSE	-0.881	0.078	FALSE
Q99KV1	Dnajb11	DnaJ homolog subfamily B member 11	Yes	Serves as a co-chaperone for HSPA5. Binds directly to both unfolded proteins that are substrates for ERAD and nascent unfolded peptide chains, but dissociates from the HSPA5-unfolded protein complex before folding is completed. May help recruiting HSPA5 and other chaperones to the substrate. Stimulates HSPA5 ATPase activity (By similarity).	Endoplasmic reticulum lumen.	Chaperone; Complete proteome; Disulfide bond; Endoplasmic reticulum;Glycoprotein; Phosphoprotein; Reference proteome; Signal.	CTDII; DnaJ	GO:0005737;GO:0005788;GO:0005634;GO:0051082;GO:0016556;GO:0006457	1.46	0.342	FALSE	0.524	0.787	FALSE
G3X922	Dnajc13					Complete proteome; Reference proteome.	DnaJ; DUF4339		-0.958	0.312	FALSE	-0.951	0.349	FALSE
P54103	Dnajc2	DnaJ homolog subfamily C member 2;DnaJ homolog subfamily C member 2, N-terminally processed		Acts both as a chaperone in the cytosol and as a chromatin regulator in the nucleus. When cytosolic, acts as a molecular chaperone: component of the ribosome-associated complex (RAC), a complex involved in folding or maintaining nascent polypeptides in a folding-competent state. In the RAC complex, stimulates the ATPase activity of the ribosome-associated pool of Hsp70-type chaperones HSPA14 that…	Nucleus. Cytoplasm, cytosol (By similarity).	Acetylation; Activator; Chaperone; Chromatin regulator;Complete proteome; Cytoplasm; Nucleus; Phosphoprotein;Reference proteome; Repeat; Transcription; Transcription regulation.	DnaJ; Myb_DNA-binding	GO:0005829;GO:0031965;GO:0005634;GO:0003682;GO:0003677;GO:0042393;GO:0043130;GO:0016568;GO:0006260;GO:0030308;GO:2000279;GO:0045893;GO:0006351	-0.257	0.695	FALSE	-0.658	0.31	FALSE
E9Q8D0	Dnajc21					Chaperone; Complete proteome; Reference proteome.	DnaJ; zf-C2H2_jaz	GO:0003676;GO:0008270	-1.05	0.301	FALSE	-1.27	0.232	FALSE
A2A4A1	Dnajc24	DnaJ homolog subfamily C member 24				Complete proteome; Reference proteome.	DnaJ; zf-CSL	GO:0001671;GO:0008198;GO:0008270	-0.571	0.492	FALSE	0.845	0.339	FALSE
Q80TZ3-2	Dnajc6	Putative tyrosine-protein phosphatase auxilin				Complete proteome; Reference proteome.			-3.05	0.0286	TRUE	-0.223	0.904	FALSE
Q3UL32	Dnajc7	DnaJ homolog subfamily C member 7				Complete proteome; Reference proteome.	TPR_2		-0.415	0.359	FALSE	-0.142	0.811	FALSE
A2ALF2	Dnajc8	DnaJ homolog subfamily C member 8				Chaperone; Complete proteome; Reference proteome.	DnaJ		-0.0227	0.976	FALSE	-0.327	0.665	FALSE
Q91WN1	Dnajc9	DnaJ homolog subfamily C member 9				Chaperone; Complete proteome; Phosphoprotein; Reference proteome.	DnaJ	GO:0035176	0.177	0.764	FALSE	-0.047	0.954	FALSE
Q8K1M6-2	Dnm1l	Dynamin-1-like protein		Functions in mitochondrial and peroxisomal division. Mediates membrane fission through oligomerization into ring-like structures which wrap around the scission site to constict and sever the mitochondrial membrane through a GTP hydrolysis- dependent mechanism. Through its function in mitochondrial division, ensures the survival of at least some types of postmitotic neurons, including Purkinje cel…	Cytoplasm, cytosol. Golgi apparatus (By similarity). Endomembrane system; Peripheral membrane protein. Mitochondrion outer membrane; Peripheral membrane protein (By similarity). Peroxisome (By similarity). Membrane, clathrin-coated pit (By similarity). Cytoplasmic vesicle, secretory vesicle, synaptic vesicle membrane (By similarity). Note=Mainly cytosolic. Translocated to the mitochondrial membra…	Acetylation; Alternative splicing; Cell junction; Coated pit;Complete proteome; Cytoplasm; Cytoplasmic vesicle;Direct protein sequencing; Endocytosis; Glycoprotein; Golgi apparatus;GTP-binding; Hydrolase; Isopeptide bond; Membrane; Mitochondrion;Mitochondrion outer membrane; Necrosis; Nucleotide-binding;Peroxisome; Phosphoprotein; Reference proteome; S-nitrosylation;Synapse; Ubl conjugation.	Dynamin_M; Dynamin_N; GED	GO:0030054;GO:0005905;GO:0005829;GO:0005794;GO:0005741;GO:0005777;GO:0030672;GO:0005525;GO:0003924;GO:0042803;GO:0003374;GO:0006897;GO:0000266;GO:0070266;GO:0016559	-2.21	0.0833	FALSE	-1.82	0.161	FALSE
Q8K1M6-2	Dnm1l	Dynamin-1-like protein		Functions in mitochondrial and peroxisomal division. Mediates membrane fission through oligomerization into ring-like structures which wrap around the scission site to constict and sever the mitochondrial membrane through a GTP hydrolysis- dependent mechanism. Through its function in mitochondrial division, ensures the survival of at least some types of postmitotic neurons, including Purkinje cel…	Cytoplasm, cytosol. Golgi apparatus (By similarity). Endomembrane system; Peripheral membrane protein. Mitochondrion outer membrane; Peripheral membrane protein (By similarity). Peroxisome (By similarity). Membrane, clathrin-coated pit (By similarity). Cytoplasmic vesicle, secretory vesicle, synaptic vesicle membrane (By similarity). Note=Mainly cytosolic. Translocated to the mitochondrial membra…	Acetylation; Alternative splicing; Cell junction; Coated pit;Complete proteome; Cytoplasm; Cytoplasmic vesicle;Direct protein sequencing; Endocytosis; Glycoprotein; Golgi apparatus;GTP-binding; Hydrolase; Isopeptide bond; Membrane; Mitochondrion;Mitochondrion outer membrane; Necrosis; Nucleotide-binding;Peroxisome; Phosphoprotein; Reference proteome; S-nitrosylation;Synapse; Ubl conjugation.	Dynamin_M; Dynamin_N; GED	GO:0030054;GO:0005905;GO:0005829;GO:0005794;GO:0005741;GO:0005777;GO:0030672;GO:0005525;GO:0003924;GO:0042803;GO:0003374;GO:0006897;GO:0000266;GO:0070266;GO:0016559	-2.21	0.0833	FALSE	-1.82	0.161	FALSE
Q3T9X3	Dnm2;Dnm1;Dnm3	Dynamin-2;Dynamin-1;Dynamin-3				Complete proteome; GTP-binding; Nucleotide-binding;Reference proteome.	Dynamin_M; Dynamin_N; GED; PH	GO:0005874;GO:0005525;GO:0003924;GO:0006897;GO:0006184	-0.601	0.347	FALSE	-1.24	0.0628	FALSE
Q3UHZ3	Dnmt1	DNA (cytosine-5)-methyltransferase				Complete proteome; Methyltransferase; Reference proteome; Transferase.	BAH; DNA_methylase; DNMT1-RFD; zf-CXXC	GO:0000792;GO:0005634;GO:0005657;GO:0003886;GO:0008327;GO:0003723;GO:0008270;GO:0071230;GO:0000122;GO:0042127	-0.812	0.0651	FALSE	-0.977	0.0338	FALSE
O88508	Dnmt3a	DNA (cytosine-5)-methyltransferase 3A		Required for genome-wide de novo methylation and is essential for the establishment of DNA methylation patterns during development. DNA methylation is coordinated with methylation of histones. It modifies DNA in a non-processive manner and also methylates non-CpG sites. May preferentially methylate DNA linker between 2 nucleosomal cores and is inhibited by histone H1. Plays a role in paternal and…	Nucleus. Cytoplasm (By similarity). Note=Accumulates in the major satellite repeats at pericentric heterochromatin.	3D-structure; Alternative promoter usage; Chromatin regulator;Complete proteome; Cytoplasm; DNA-binding; Metal-binding;Methyltransferase; Nucleus; Phosphoprotein; Reference proteome;Repressor; S-adenosyl-L-methionine; Transcription;Transcription regulation; Transferase; Ubl conjugation; Zinc;Zinc-finger.	DNA_methylase; PWWP	GO:0000775;GO:0005737;GO:0000791;GO:0005720;GO:0016363;GO:0003682;GO:0003886;GO:0051718;GO:0003677;GO:0046872;GO:0045322;GO:0071230;GO:0043045;GO:0043046;GO:0010424;GO:0044027;GO:0010216;GO:0006346;GO:0000122;GO:0006349;GO:0046498;GO:0046499;GO:0007283;GO:0006351	-1.28	0.243	FALSE	0.786	0.523	FALSE
Q8CAJ7	Dnpep	Aspartyl aminopeptidase		Aminopeptidase with specificity towards an acidic amino acid at the N-terminus. Likely to play an important role in intracellular protein and peptide metabolism (By similarity).	Cytoplasm.	Aminopeptidase; Complete proteome; Cytoplasm; Hydrolase;Metal-binding; Metalloprotease; Protease; Reference proteome; Zinc.	Peptidase_M18	GO:0005737;GO:0004177;GO:0008237;GO:0008270;GO:0006508	0.406	0.255	FALSE	0.101	0.833	FALSE
Q80VJ3	Dnph1	2-deoxynucleoside 5-phosphate N-hydrolase 1		Catalyzes the cleavage of the N-glycosidic bond of deoxyribonucleoside 5'-monophosphates to yield deoxyribose 5- phosphate and a purine or pyrimidine base. Deoxyribonucleoside 5'- monophosphates containing purine bases are preferred to those containing pyrimidine bases (By similarity).	Cytoplasm (By similarity). Nucleus (By similarity).	Acetylation; Complete proteome; Cytoplasm; Glycosidase; Hydrolase;Nucleotide metabolism; Nucleus; Phosphoprotein; Reference proteome.	Nuc_deoxyrib_tr	GO:0005737;GO:0005634;GO:0070694;GO:0050144;GO:0009159;GO:0009116;GO:0009117;GO:0030307	-0.00623	0.99	FALSE	-0.138	0.809	FALSE
Q8R2M2	Dnttip2	Deoxynucleotidyltransferase terminal-interacting protein 2		Regulates the transcriptional activity of DNTT and ESR1. May function as a chromatin remodeling protein (By similarity).	Nucleus (By similarity).	Coiled coil; Complete proteome; Nucleus; Phosphoprotein;Reference proteome; Transcription; Transcription regulation.	Fcf2	GO:0005730;GO:0006355;GO:0006351	-0.539	0.413	FALSE	-1.54	0.032	TRUE
F1AHI9	Dock10	Dedicator of cytokinesis protein 10				Complete proteome; Reference proteome.	Ded_cyto; DOCK-C2; DUF3398; PH	GO:0005089;GO:0007264	0.185	0.804	FALSE	-0.444	0.552	FALSE
A2AF47	Dock11	Dedicator of cytokinesis protein 11		Guanine nucleotide-exchange factor (GEF) that activates CDC42 by exchanging bound GDP for free GTP.		Complete proteome; Guanine-nucleotide releasing factor;Phosphoprotein; Reference proteome.	Ded_cyto; DOCK-C2; DUF3398; PH	GO:0005089;GO:0007264	0.368	0.381	FALSE	-0.387	0.403	FALSE
Q8C3J5	Dock2	Dedicator of cytokinesis protein 2		Involved in cytoskeletal rearrangements required for lymphocyte migration in response of chemokines. Activates RAC1 and RAC2, but not CDC42, by functioning as a guanine nucleotide exchange factor (GEF), which exchanges bound GDP for free GTP. May also participate in IL2 transcriptional activation via the activation of RAC2.	Endomembrane system; Peripheral membrane protein (By similarity). Cytoplasm, cytoskeleton (By similarity). Note=Colocalizes with F-actin (By similarity).	Acetylation; Complete proteome; Cytoplasm; Cytoskeleton;Guanine-nucleotide releasing factor; Membrane; Phosphoprotein;Reference proteome; SH3 domain.	Ded_cyto; DOCK-C2; SH3_1	GO:0005737;GO:0005856;GO:0012505;GO:0016020;GO:0030675;GO:0030676;GO:0042608;GO:0046633;GO:0006935;GO:0007010;GO:0001768;GO:0001771;GO:0044351;GO:0001766;GO:0002277;GO:0045060;GO:0050766;GO:0035022;GO:0045059;GO:0007264	-0.347	0.696	FALSE	-0.698	0.432	FALSE
Q8C147	Dock8;Dock7;mKIAA1395;Dock6	Dedicator of cytokinesis protein 8;Dedicator of cytokinesis protein 7;Dedicator of cytokinesis protein 6		Potential guanine nucleotide exchange factor (GEF). GEF proteins activate some small GTPases by exchanging bound GDP for free GTP (By similarity).		3D-structure; Alternative splicing; Complete proteome;Guanine-nucleotide releasing factor; Phosphoprotein;Reference proteome.	Ded_cyto; DOCK-C2; DUF3398	GO:0005085;GO:0043087;GO:0007264	-1.09	0.0868	FALSE	-0.841	0.195	FALSE
D3Z7J7	Dohh	Deoxyhypusine hydroxylase				Complete proteome; Reference proteome.		GO:0019135;GO:0055114;GO:0008612	-0.0906	0.955	FALSE	0.535	0.753	FALSE
D3Z5N6	Dpf2	Zinc finger protein ubi-d4				Complete proteome; Metal-binding; Reference proteome; Zinc;Zinc-finger.	PHD; Requiem_N	GO:0005737;GO:0005634;GO:0008270	0.00645	0.994	FALSE	-0.363	0.655	FALSE
Q5NCQ5	Dph1	Diphthamide biosynthesis protein 1		Required for the first step in the synthesis of diphthamide, a post-translational modification of histidine which occurs in translation elongation factor 2 (EEF2). Acts also as a tumor suppressor in lung and breast cancers. Plays a role in embryonic growth, organogenesis and postnatal survival. When overexpressed, suppresses colony formation ability and growth rate of ovarian cancer cells (By sim…	Nucleus. Cytoplasm. Note=Punctate, primarily perinuclear localization.	Complete proteome; Cytoplasm; Nucleus; Reference proteome;Tumor suppressor.	Diphthamide_syn	GO:0005737;GO:0005634;GO:0008283;GO:0017183	-0.904	0.491	FALSE	0.166	0.931	FALSE
Q9CR25	Dph2	Diphthamide biosynthesis protein 2		Required for the first step in the synthesis of diphthamide, a post-translational modification of histidine which occurs in translation elongation factor 2 (EEF2).		Acetylation; Complete proteome; Phosphoprotein; Reference proteome.	Diphthamide_syn	GO:0005737;GO:0017183	-0.929	0.555	FALSE	1.1	0.531	FALSE
Q9CWQ0	Dph5	Diphthine synthase		S-adenosyl-L-methionine-dependent methyltransferase that catalyzes the trimethylation of the amino group of the modified target histidine residue in translation elongation factor 2 (EFE2), to form an intermediate called diphthine. The three successive methylation reactions represent the second step of diphthamide biosynthesis.		Complete proteome; Methyltransferase; Reference proteome;S-adenosyl-L-methionine; Transferase.	TP_methylase	GO:0004164;GO:0017183	-0.327	0.84	FALSE	-1.09	0.501	FALSE
Q9CYU6	Dph7	Diphthine methyltransferase		Plays a role in the diphthamide biosynthesis, a post- translational modification of histidine which occurs in translation elongation factor 2 (EEF2). May have a regulatory role, promoting dissociation of diphthine synthase DPH5 from elongation factor 2 (By similarity).		Alternative splicing; Complete proteome; Reference proteome; Repeat;WD repeat.	WD40	GO:0017183	0.703	0.364	FALSE	0.713	0.403	FALSE
Q3UDF3	Dpp3	Dipeptidyl peptidase 3		Cleaves and degrades of the opioid peptide enkephalin. Also cleaves Arg-Arg-beta-naphthylamide (By similarity).	Cytoplasm (By similarity).	Acetylation; Aminopeptidase; Complete proteome; Cytoplasm; Hydrolase;Metal-binding; Metalloprotease; Protease; Reference proteome; Zinc.		GO:0005737;GO:0005634;GO:0005886;GO:0004177;GO:0008239;GO:0008237;GO:0008270;GO:0006508	0.0671	0.9	FALSE	0.204	0.729	FALSE
Q3TR43	Dpp4	Dipeptidyl peptidase 4;Dipeptidyl peptidase 4 membrane form;Dipeptidyl peptidase 4 soluble form	Yes	Cell surface glycoprotein receptor involved in the costimulatory signal essential for T-cell receptor (TCR)-mediated T-cell activation. Acts as a positive regulator of T-cell coactivation, by binding at least ADA, CAV1, IGF2R, and PTPRC. Its binding to CAV1 and CARD11 induces T-cell proliferation and NF- kappa-B activation in a T-cell receptor/CD3-dependent manner. Its interaction with ADA also r…	Dipeptidyl peptidase 4 soluble form: Secreted. Note=Detected in the serum and the seminal fluid (By similarity).	Aminopeptidase; Cell adhesion; Cell junction; Cell membrane;Cell projection; Complete proteome; Direct protein sequencing;Disulfide bond; Glycoprotein; Hydrolase; Membrane; Protease; Receptor;Reference proteome; Secreted; Serine protease; Signal-anchor;Transmembrane; Transmembrane helix.	DPPIV_N; Peptidase_S9	GO:0016324;GO:0009986;GO:0030139;GO:0070062;GO:0016021;GO:0046581;GO:0071438;GO:0030027;GO:0031258;GO:0045121;GO:0004177;GO:0008239;GO:0002020;GO:0042803;GO:0005102;GO:0004252;GO:0007155;GO:0043542;GO:0010716;GO:0008284;GO:0006508;GO:0033632;GO:0001666;GO:0042110;GO:0031295	-0.5	0.513	FALSE	-2.38	0.00578	TRUE
Q8BVG4	Dpp9	Dipeptidyl peptidase 9		Dipeptidyl peptidase that cleaves off N-terminal dipeptides from proteins having a Pro or Ala residue at position 2 (By similarity).	Cytoplasm, cytosol (By similarity).	Alternative splicing; Aminopeptidase; Complete proteome; Cytoplasm;Hydrolase; Protease; Reference proteome; Serine protease.	DPPIV_N; Peptidase_S9	GO:0005829;GO:0016020;GO:0004177;GO:0008236;GO:0006508	-1.07	0.079	FALSE	-0.486	0.453	FALSE
O08553	Dpysl2	Dihydropyrimidinase-related protein 2		Plays a role in neuronal development and polarity, as well as in axon growth and guidance, neuronal growth cone collapse and cell migration. Necessary for signaling by class 3 semaphorins and subsequent remodeling of the cytoskeleton. May play a role in endocytosis.	Cytoplasm, cytosol (By similarity). Cytoplasm, cytoskeleton (By similarity). Membrane (By similarity). Note=Tightly but non-covalently associated with membranes (By similarity).	Complete proteome; Cytoplasm; Cytoskeleton; Developmental protein;Differentiation; Direct protein sequencing; Membrane; Neurogenesis;Phosphoprotein; Reference proteome; S-nitrosylation.	Amidohydro_1	GO:0030424;GO:0005856;GO:0005829;GO:0030425;GO:0030426;GO:0016020;GO:0005739;GO:0043025;GO:0043234;GO:0016812;GO:0007010;GO:0006897;GO:0021772;GO:0014049;GO:0006208;GO:0045664;GO:0001975;GO:0042220;GO:0042493;GO:0021510;GO:0048489	-0.0943	0.809	FALSE	-0.28	0.457	FALSE
Q3UMQ2	Dr1	Protein Dr1		The association of the DR1/DRAP1 heterodimer with TBP results in a functional repression of both activated and basal transcription of class II genes. This interaction precludes the formation of a transcription-competent complex by inhibiting the association of TFIIA and/or TFIIB with TBP. Can bind to DNA on its own. Component of the ATAC complex, a complex with histone acetyltransferase activity …	Nucleus (By similarity).	Acetylation; Complete proteome; DNA-binding; Nucleus; Phosphoprotein;Reference proteome; Repressor; Transcription;Transcription regulation.	CBFD_NFYB_HMF	GO:0005671;GO:0005634;GO:0043565;GO:0043966;GO:0006355;GO:0006351	0.27	0.548	FALSE	-0.0218	0.975	FALSE
D3YYC2	Drap1	Dr1-associated corepressor				Complete proteome; Nucleus; Reference proteome.	CBFD_NFYB_HMF	GO:0005634;GO:0043565;GO:0003714;GO:0008134;GO:0000122	-0.39	0.618	FALSE	0.397	0.65	FALSE
Q8BNS0	Drg1	Developmentally-regulated GTP-binding protein 1				Complete proteome; Reference proteome.	TGS		-1.49	0.0589	FALSE	-1.67	0.0409	TRUE
Q9QXB9	Drg2	Developmentally-regulated GTP-binding protein 2		May play a role in cell proliferation, differentiation and death.	Cytoplasm (By similarity).	Complete proteome; Cytoplasm; GTP-binding; Nucleotide-binding;Reference proteome; Ubl conjugation.	MMR_HSR1; TGS	GO:0005739;GO:0005525	0.388	0.84	FALSE	-0.885	0.662	FALSE
Q4FK36	Dstn	Destrin		Actin-depolymerizing protein. Severs actin filaments (F- actin) and binds to actin monomers (G-actin). Acts in a pH- independent manner.		Acetylation; Actin-binding; Complete proteome;Direct protein sequencing; Phosphoprotein; Reference proteome;Ubl conjugation.	Cofilin_ADF	GO:0030864;GO:0030042;GO:0006928;GO:0030836	-0.213	0.882	FALSE	0.18	0.925	FALSE
Q8BHA3	Dtd2	Probable D-tyrosyl-tRNA(Tyr) deacylase 2		Hydrolyzes D-tyrosyl-tRNA(Tyr) into D-tyrosine and free tRNA(Tyr). Could be a defense mechanism against a harmful effect of D-tyrosine (Potential).	Cytoplasm (Potential).	Alternative splicing; Complete proteome; Cytoplasm; Hydrolase;Reference proteome.	Tyr_Deacylase	GO:0005737;GO:0016788;GO:0019478	0.391	0.869	FALSE	0.537	0.85	FALSE
I6L9G8	Dtx3l	E3 ubiquitin-protein ligase DTX3L		Ubiquitin ligase that mediates monoubiquitination of 'Lys-91' of histone H4 (H4K91ub1), in response to DNA damage. Protects cells exposed to DNA-damaging agents. The exact role of H4K91ub1 in DNA damage response is still unclear but it may function as a licensing signal for additional histone H4 post- translational modifications such as H4 'Lys-20' methylation (H4K20me). Involved in the recruitme…	Cytoplasm (By similarity). Nucleus (By similarity). Note=Localizes at sites of DNA damage in a PARP1- dependent manner (By similarity).	Acetylation; Alternative splicing; Chromatin regulator;Complete proteome; Cytoplasm; DNA damage; DNA repair; Ligase;Metal-binding; Nucleus; Phosphoprotein; Reference proteome;Ubl conjugation pathway; Zinc; Zinc-finger.	zf-RING_2	GO:0005737;GO:0005634;GO:0042393;GO:0004842;GO:0008270;GO:0006302;GO:0010390	0.64	0.434	FALSE	-0.47	0.625	FALSE
A0A0R4IZY9	Dus3l	tRNA-dihydrouridine(47) synthase [NAD(P)(+)]-like		Catalyzes the synthesis of dihydrouridine, a modified base found in the D-loop of most tRNAs (By similarity).		Alternative splicing; Complete proteome; FAD; Flavoprotein;Metal-binding; Oxidoreductase; Phosphoprotein; Reference proteome;Repeat; tRNA processing; Zinc; Zinc-finger.	Dus	GO:0050660;GO:0046872;GO:0017150;GO:0002943	-0.211	0.865	FALSE	1.63	0.156	FALSE
B1AQF4	Dusp3	Dual specificity protein phosphatase 3				Complete proteome; Hydrolase; Reference proteome.	DSPc	GO:0005829;GO:0005654;GO:0033549;GO:0004725;GO:0008138;GO:0070373;GO:0046329;GO:0050868;GO:0050860;GO:0035335;GO:0045931	-0.45	0.604	FALSE	-0.811	0.366	FALSE
Q9CQ43	Dut					Complete proteome; Reference proteome.	dUTPase	GO:0005739;GO:0004170;GO:0046080	0.682	0.0978	FALSE	0.298	0.512	FALSE
Q9JHU4	Dync1h1	Cytoplasmic dynein 1 heavy chain 1		Cytoplasmic dynein 1 acts as a motor for the intracellular retrograde motility of vesicles and organelles along microtubules. Dynein has ATPase activity; the force-producing power stroke is thought to occur on release of ADP.	Cytoplasm, cytoskeleton.	3D-structure; Acetylation; ATP-binding; Coiled coil;Complete proteome; Cytoplasm; Cytoskeleton; Disease mutation; Dynein;Microtubule; Motor protein; Nucleotide-binding; Phosphoprotein;Reference proteome; Repeat; Transport.	AAA_5; AAA_8; DHC_N1; DHC_N2; Dynein_heavy; MT	GO:0005858;GO:0005813;GO:0070062;GO:0030175;GO:0005794;GO:0005874;GO:0005524;GO:0016887;GO:0003777;GO:0006200;GO:0003341;GO:0033962;GO:0034063;GO:0006810	-0.66	0.348	FALSE	-0.713	0.346	FALSE
A2BFF8	Dync1i2	Cytoplasmic dynein 1 intermediate chain 2				Complete proteome; Reference proteome; Repeat; WD repeat.	Dynein_IC2; WD40	GO:0005868;GO:0007018	-0.0995	0.828	FALSE	0.365	0.404	FALSE
Q3TWG5	Dync1li1	Cytoplasmic dynein 1 light intermediate chain 1		Acts as one of several non-catalytic accessory components of the cytoplasmic dynein 1 complex that are thought to be involved in linking dynein to cargos and to adapter proteins that regulate dynein function. Cytoplasmic dynein 1 acts as a motor for the intracellular retrograde motility of vesicles and organelles along microtubules. May play a role in binding dynein to membranous organelles or ch…	Cytoplasm (By similarity). Chromosome, centromere, kinetochore (By similarity). Cytoplasm, cytoskeleton, spindle pole (By similarity).	ATP-binding; Cell cycle; Cell division; Centromere; Chromosome;Complete proteome; Cytoplasm; Cytoskeleton; Direct protein sequencing;Dynein; Kinetochore; Microtubule; Mitosis; Motor protein;Nucleotide-binding; Phosphoprotein; Reference proteome; Transport.	DLIC	GO:0005813;GO:0000777;GO:0005868;GO:0000776;GO:0005874;GO:0005886;GO:0000922;GO:0005524;GO:0003777;GO:0007018;GO:0007067;GO:0090267;GO:0006810	0.587	0.298	FALSE	0.649	0.279	FALSE
Q6PDL0	Dync1li2	Cytoplasmic dynein 1 light intermediate chain 2		Acts as one of several non-catalytic accessory components of the cytoplasmic dynein 1 complex that are thought to be involved in linking dynein to cargos and to adapter proteins that regulate dynein function. Cytoplasmic dynein 1 acts as a motor for the intracellular retrograde motility of vesicles and organelles along microtubules. May play a role in binding dynein to membranous organelles or ch…	Cytoplasm, cytoskeleton (By similarity).	ATP-binding; Complete proteome; Cytoplasm; Cytoskeleton; Dynein;Microtubule; Motor protein; Nucleotide-binding; Phosphoprotein;Reference proteome; Transport.	DLIC	GO:0005813;GO:0005868;GO:0005874;GO:0005524;GO:0003777;GO:0051642;GO:0008152;GO:0000226;GO:0007018;GO:0006810	-1.12	0.332	FALSE	-0.468	0.741	FALSE
P63168	Dynll1	Dynein light chain 1, cytoplasmic		Promotes transactivation functions of ESR1 and plays a role in the nuclear localization of ESR1 (By similarity).	Cytoplasm, cytoskeleton (By similarity). Nucleus (By similarity). Mitochondrion (By similarity).	Acetylation; Activator; Apoptosis; Complete proteome; Cytoplasm;Cytoskeleton; Dynein; Microtubule; Mitochondrion; Motor protein;Nucleus; Phosphoprotein; Reference proteome; Transcription;Transcription regulation; Transport.	Dynein_light	GO:0005813;GO:0008180;GO:0005868;GO:0005829;GO:0000776;GO:0016020;GO:0005874;GO:0005739;GO:0072686;GO:0003774;GO:0030235;GO:0006915;GO:0007018;GO:0042326;GO:0050790;GO:0006355;GO:0006351;GO:0006810	0.411	0.741	FALSE	0.384	0.786	FALSE
A2AVR9	Dynlrb1	Dynein light chain roadblock-type 1				Complete proteome; Reference proteome.	Robl_LC7		-0.862	0.608	FALSE	-1.34	0.45	FALSE
Q5EBK8	Dynlt1	Dynein light chain Tctex-type 1		Acts as one of several non-catalytic accessory components of the cytoplasmic dynein 1 complex that are thought to be involved in linking dynein to cargos and to adapter proteins that regulate dynein function. Cytoplasmic dynein 1 acts as a motor for the intracellular retrograde motility of vesicles and organelles along microtubules. Binds to transport cargos and is involved in apical cargo transp…	Golgi apparatus (By similarity). Cytoplasm (By similarity). Cytoplasm, cytoskeleton, spindle (By similarity). Note=Localizes to mitotic spindles (By similarity).	Acetylation; Cell cycle; Cell division; Complete proteome; Cytoplasm;Cytoskeleton; Dynein; Golgi apparatus; Microtubule; Mitosis;Motor protein; Neurogenesis; Phosphoprotein; Reference proteome;Transport.	Tctex-1	GO:0005868;GO:0005794;GO:0005874;GO:0001917;GO:0005819;GO:0003774;GO:0000132;GO:0008152;GO:0007067;GO:0050768;GO:0008277;GO:0006810	-0.48	0.759	FALSE	-0.386	0.833	FALSE
F7B227	Ech1	Delta(3,5)-Delta(2,4)-dienoyl-CoA isomerase, mitochondrial				Complete proteome; Reference proteome.	ECH	GO:0005739;GO:0003824	1.2	0.119	FALSE	0.0615	0.959	FALSE
Q9D9V3-2	Echdc1	Ethylmalonyl-CoA decarboxylase	Yes			Complete proteome; Reference proteome.	ECH	GO:0003824	-1.89	0.105	FALSE	0.348	0.815	FALSE
Q8BH95	Echs1	Enoyl-CoA hydratase, mitochondrial		Straight-chain enoyl-CoA thioesters from C4 up to at least C16 are processed, although with decreasing catalytic rate (By similarity).	Mitochondrion matrix (By similarity).	Acetylation; Complete proteome; Direct protein sequencing;Fatty acid metabolism; Lipid metabolism; Lyase; Mitochondrion;Reference proteome; Transit peptide.	ECH	GO:0005759;GO:0005739;GO:0004300;GO:0006635	0.68	0.49	FALSE	1.67	0.101	FALSE
Q9DBN7	Eci1	Enoyl-CoA delta isomerase 1, mitochondrial		Able to isomerize both 3-cis and 3-trans double bonds into the 2-trans form in a range of enoyl-CoA species.	Mitochondrion matrix.	Acetylation; Complete proteome; Fatty acid metabolism; Isomerase;Lipid metabolism; Mitochondrion; Reference proteome; Transit peptide.	ECH	GO:0005743;GO:0005759;GO:0004165;GO:0006635	2.45	0.0252	TRUE	0.689	0.547	FALSE
Q6PDI5-2	Ecm29;AI314180	Proteasome-associated protein ECM29 homolog		Adapter/scaffolding protein that binds to the 26S proteasome, motor proteins and other compartment specific proteins. May couple the proteasome to different compartments including endosome, endoplasmic reticulum and centrosome. May play a role in ERAD and other enhanced proteolyis (By similarity).	Endoplasmic reticulum (By similarity). Endoplasmic reticulum-Golgi intermediate compartment (By similarity). Endosome (By similarity). Cytoplasm, cytoskeleton, microtubule organizing center, centrosome (By similarity). Nucleus (By similarity). Endosome, multivesicular body (By similarity). Cytoplasmic vesicle (By similarity).	Alternative splicing; Complete proteome; Cytoplasm;Cytoplasmic vesicle; Cytoskeleton; Endoplasmic reticulum; Endosome;Nucleus; Phosphoprotein; Proteasome; Reference proteome; Repeat.	Ecm29	GO:0030139;GO:0005783;GO:0005793;GO:0005815;GO:0005771;GO:0005634;GO:0000502	-0.391	0.471	FALSE	-0.402	0.51	FALSE
A0ELI5	Edc3	Enhancer of mRNA-decapping protein 3		Binds single-stranded RNA. In the process of mRNA degradation, may play a role in mRNA decapping (By similarity).	Cytoplasm, P-body (By similarity). Note=Processing bodies (PB) (By similarity).	Complete proteome; Cytoplasm; Phosphoprotein; Reference proteome;RNA-binding.	FDF; LSM14; YjeF_N	GO:0000932;GO:0003723	-0.965	0.21	FALSE	-0.575	0.509	FALSE
D6RE33	Edc4	Enhancer of mRNA-decapping protein 4				Complete proteome; Reference proteome; WD repeat.		GO:0000932	-0.569	0.352	FALSE	0.338	0.641	FALSE
Q9JMG1	Edf1	Endothelial differentiation-related factor 1		Transcriptional coactivator stimulating NR5A1 and ligand-dependent NR1H3/LXRA and PPARG transcriptional activities. Enhances the DNA-binding activity of ATF1, ATF2, CREB1 and NR5A1. Regulates nitric oxid synthase activity probably by sequestering calmodulin in the cytoplasm. Might function in endothelial cells differentiation, hormone-induced cardiomyocytes hypertrophy and lipid metabolism (By si…	Cytoplasm (By similarity). Nucleus (By similarity). Note=Also nuclear upon binding to NR5A1 and treatment of cells with TPA or forskolin (By similarity).	Acetylation; Activator; Calmodulin-binding; Complete proteome;Cytoplasm; Developmental protein; Differentiation; DNA-binding;Nucleus; Phosphoprotein; Reference proteome; Transcription;Transcription regulation.	HTH_3; MBF1	GO:0005737;GO:0005730;GO:0005669;GO:0043565;GO:0003713;GO:0030154;GO:0007275;GO:0043388;GO:0006355;GO:0006351	0.334	0.849	FALSE	-0.838	0.65	FALSE
Q8BL66	Eea1	Early endosome antigen 1		Binds phospholipid vesicles containing phosphatidylinositol 3-phosphate and participates in endosomal trafficking (By similarity).	Cytoplasm (By similarity). Early endosome membrane; Peripheral membrane protein (By similarity).	Coiled coil; Complete proteome; Cytoplasm; Endosome; Membrane;Metal-binding; Phosphoprotein; Reference proteome; Zinc; Zinc-finger.	FYVE	GO:0031410;GO:0005829;GO:0005769;GO:0031901;GO:0019897;GO:0055037;GO:0005969;GO:0005545;GO:0046872;GO:0006897;GO:0006906	-0.46	0.364	FALSE	-0.444	0.428	FALSE
Q921E6	Eed	Polycomb protein EED		Polycomb group (PcG) protein. Component of the PRC2/EED- EZH2 complex, which methylates 'Lys-9' and 'Lys-27' of histone H3, leading to transcriptional repression of the affected target gene. Also recognizes 'Lys-26' trimethylated histone H1 with the effect of inhibiting PRC2 complex methyltransferase activity on nucleosomal histone H3 'Lys-27', whereas H3 'Lys-27' recognition has the opposite eff…	Nucleus. Chromosome. Note=Localizes to the inactive X chromosome in cells of the early embryo and in stem cells of the extraembryonic trophectoderm lineage. Recruitment to the inactive X-chromosome requires XIST.	3D-structure; Acetylation; Alternative initiation;Chromatin regulator; Chromosome; Complete proteome; Methylation;Nucleus; Phosphoprotein; Reference proteome; Repeat; Repressor;Transcription; Transcription regulation; WD repeat.	WD40	GO:0035098;GO:0045120;GO:0001739;GO:0003682;GO:0042054;GO:0016571;GO:0061087;GO:0006349;GO:0006355;GO:0006351	-1.17	0.326	FALSE	-1.21	0.346	FALSE
Q58E64	Eef1a1;Eef1a2	Elongation factor 1-alpha;Elongation factor 1-alpha 1;Elongation factor 1-alpha 2				Complete proteome; GTP-binding; Nucleotide-binding;Reference proteome.	GTP_EFTU	GO:0005737;GO:0005886;GO:0005525;GO:0003924;GO:0006184	-0.536	0.345	FALSE	-0.799	0.178	FALSE
O70251	Eef1b;Eef1b2	Elongation factor 1-beta		EF-1-beta and EF-1-delta stimulate the exchange of GDP bound to EF-1-alpha to GTP (By similarity).		Acetylation; Complete proteome; Direct protein sequencing;Elongation factor; Phosphoprotein; Protein biosynthesis;Reference proteome.	EF-1_beta_acid; EF1_GNE	GO:0005853;GO:0003746	-0.112	0.952	FALSE	0.625	0.753	FALSE
Q80T06	Eef1d	Elongation factor 1-delta				Complete proteome; Elongation factor; Protein biosynthesis;Reference proteome.	EF-1_beta_acid; EF1_GNE	GO:0005853;GO:0004871;GO:0003746;GO:0043123	-0.444	0.247	FALSE	-0.377	0.36	FALSE
Q80T06	Eef1d	Elongation factor 1-delta				Complete proteome; Elongation factor; Protein biosynthesis;Reference proteome.	EF-1_beta_acid; EF1_GNE	GO:0005853;GO:0004871;GO:0003746;GO:0043123	-0.444	0.247	FALSE	-0.377	0.36	FALSE
Q9D1M4	Eef1e1	Eukaryotic translation elongation factor 1 epsilon-1		Positive modulator of ATM response to DNA damage (By similarity).	Cytoplasm. Nucleus. Note=Cytoplasmic under growth arrest conditions. Translocated into the nucleus when growth resumes at S phase and following DNA damage.	Acetylation; Coiled coil; Complete proteome; Cytoplasm; Nucleus;Protein biosynthesis; Reference proteome.	GST_C	GO:0017101;GO:0005737;GO:0005634;GO:0006281;GO:0009790;GO:0008285;GO:0043065;GO:2001235;GO:0043517;GO:0006412	0.306	0.852	FALSE	-1	0.553	FALSE
Q4FZK2	Eef1g	Elongation factor 1-gamma		Probably plays a role in anchoring the complex to other cellular components (By similarity).		Acetylation; Complete proteome; Direct protein sequencing;Elongation factor; Protein biosynthesis; Reference proteome.	EF1G; GST_C; GST_N	GO:0005853;GO:0003746;GO:0009615	-0.805	0.296	FALSE	-1.11	0.167	FALSE
Q3UDC8	Eef2	Elongation factor 2		Catalyzes the GTP-dependent ribosomal translocation step during translation elongation. During this step, the ribosome changes from the pre-translocational (PRE) to the post- translocational (POST) state as the newly formed A-site-bound peptidyl-tRNA and P-site-bound deacylated tRNA move to the P and E sites, respectively. Catalyzes the coordinated movement of the two tRNA molecules, the mRNA and…	Cytoplasm.	Acetylation; Complete proteome; Cytoplasm; Direct protein sequencing;Elongation factor; GTP-binding; Nucleotide-binding; Phosphoprotein;Protein biosynthesis; Reference proteome; Ubl conjugation.	EFG_C; EFG_II; EFG_IV; GTP_EFTU; GTP_EFTU_D2	GO:0005737;GO:0005844;GO:0005525;GO:0003924;GO:0003746;GO:0006414	-0.266	0.42	FALSE	-0.206	0.591	FALSE
Q3UWZ1	Eef2k	Eukaryotic elongation factor 2 kinase				Complete proteome; Reference proteome.	Alpha_kinase; Sel1	GO:0005524;GO:0005509;GO:0004686	-0.686	0.591	FALSE	-0.505	0.736	FALSE
Q8C845	Efhd2;Efhd1	EF-hand domain-containing protein D2;EF-hand domain-containing protein D1				Complete proteome; Reference proteome.	EF-hand_7	GO:0005509	-0.196	0.79	FALSE	-0.112	0.903	FALSE
Q8C0D5	Eftud1	Elongation factor Tu GTP-binding domain-containing protein 1		Involved in the biogenesis of the 60S ribosomal subunit and translational activation of ribosomes. Together with SBDS, triggers the GTP-dependent release of EIF6 from 60S pre-ribosomes in the cytoplasm, thereby activating ribosomes for translation competence by allowing 80S ribosome assembly and facilitating EIF6 recycling to the nucleus, where it is required for 60S rRNA processing and nuclear e…		Acetylation; Complete proteome; Elongation factor; GTP-binding;Nucleotide-binding; Protein biosynthesis; Reference proteome;Ribosome biogenesis.	EFG_C; EFG_II; GTP_EFTU; GTP_EFTU_D2	GO:0005525;GO:0003924;GO:0043022;GO:0003746;GO:0042256	-1.12	0.266	FALSE	-0.95	0.388	FALSE
Q543F1	Eftud2	116 kDa U5 small nuclear ribonucleoprotein component				Complete proteome; Reference proteome.	EFG_IV	GO:0005634;GO:0005525	-0.893	0.0854	FALSE	-0.857	0.104	FALSE
Q5FW97	EG433182;Eno1	Alpha-enolase;Enolase				Complete proteome; Reference proteome.	Enolase_N	GO:0000015;GO:0000287;GO:0004634;GO:0006096	-0.175	0.725	FALSE	0.393	0.424	FALSE
Q91YE3	Egln1;Egln3	Egl nine homolog 1;Egl nine homolog 3		Cellular oxygen sensor that catalyzes, under normoxic conditions, the post-translational formation of 4-hydroxyproline in hypoxia-inducible factor (HIF) alpha proteins. Hydroxylates a specific proline found in each of the oxygen-dependent degradation (ODD) domains (N-terminal, NODD, and C-terminal, CODD) of HIF1A. Also hydroxylates HIF2A. Has a preference for the CODD site for both HIF1A and HIF1…	Cytoplasm (By similarity). Nucleus (By similarity). Note=Mainly cytoplasmic. Shuttles between the nucleus and cytoplasm. Nuclear export requires functional XPO1 (By similarity).	Acetylation; Complete proteome; Cytoplasm; Dioxygenase; Iron;Metal-binding; Nucleus; Oxidoreductase; Reference proteome;S-nitrosylation; Vitamin C; Zinc; Zinc-finger.	2OG-FeII_Oxy_3; zf-MYND	GO:0005829;GO:0005634;GO:0005506;GO:0031418;GO:0031545;GO:0055008;GO:0060347;GO:0060711;GO:0030821;GO:0051344;GO:0043433;GO:0032364;GO:0018401;GO:0045765;GO:0001666;GO:0071731;GO:0060412	-1.28	0.0786	FALSE	-0.694	0.359	FALSE
Q80ZZ0	Ehd1	EH domain-containing protein 1		Acts in early endocytic membrane fusion and membrane trafficking of recycling endosomes. Plays a role in myoblast fusion. Recruited to endosomal membranes upon nerve growth factor stimulation, indirectly regulates neurite outgrowth.	Recycling endosome membrane; Peripheral membrane protein (By similarity). Early endosome membrane; Peripheral membrane protein. Cell membrane; Peripheral membrane protein; Cytoplasmic side. Note=Preferentially associates with tubular recycling endosomes. Colocalizes with FER1L5 at plasma membrane in myoblasts and myotubes.	Acetylation; ATP-binding; Calcium; Cell membrane; Coiled coil;Complete proteome; Endosome; Membrane; Metal-binding;Nucleotide-binding; Phosphoprotein; Reference proteome.	Dynamin_N	GO:0031901;GO:0030139;GO:0005811;GO:0048471;GO:0005886;GO:0031095;GO:0055038;GO:0005524;GO:0005509;GO:0005525;GO:0003924;GO:1990090;GO:0042632;GO:0032456;GO:0006897;GO:0006184;GO:0006886;GO:0034383;GO:0031175;GO:0010886;GO:2001137;GO:1901741;GO:0051260	-0.415	0.451	FALSE	-0.417	0.498	FALSE
Q9QXY6	Ehd3	EH domain-containing protein 3		Plays a role in endocytic transport (By similarity).	Cell membrane; Peripheral membrane protein; Cytoplasmic side. Endosome membrane; Peripheral membrane protein (By similarity). Recycling endosome membrane; Peripheral membrane protein (By similarity). Cytoplasm.	Acetylation; ATP-binding; Calcium; Cell membrane; Coiled coil;Complete proteome; Cytoplasm; Direct protein sequencing; Endosome;Membrane; Metal-binding; Nucleotide-binding; Reference proteome.	Dynamin_N	GO:0030139;GO:0048471;GO:0005886;GO:0055038;GO:0005524;GO:0005509;GO:0005525;GO:0003924;GO:0032456;GO:0006184;GO:0051260;GO:0072661;GO:0086036	-1.07	0.269	FALSE	-1.62	0.11	FALSE
Q3TM70	Ehd4	EH domain-containing protein 4		Plays a role in early endosomal transport.	Cell membrane. Early endosome membrane; Peripheral membrane protein (By similarity). Recycling endosome membrane; Peripheral membrane protein (By similarity).	ATP-binding; Calcium; Cell membrane; Complete proteome; Endosome;Membrane; Metal-binding; Nucleotide-binding; Phosphoprotein;Reference proteome.	Dynamin_N	GO:0031901;GO:0005783;GO:0048471;GO:0005886;GO:0055038;GO:0005524;GO:0005509;GO:0005525;GO:0003924;GO:0071363;GO:0032456;GO:0006184;GO:0006907;GO:0050731;GO:0051260;GO:0030100	-0.447	0.541	FALSE	-0.547	0.496	FALSE
Q3U4G9	Ehmt2	Histone-lysine N-methyltransferase EHMT2	Yes		Nucleus (By similarity).	ANK repeat; Chromosome; Complete proteome; Methyltransferase; Nucleus;Reference proteome; Repeat; S-adenosyl-L-methionine; Transferase.	Ank_2; Pre-SET; SET	GO:0005694;GO:0005634;GO:0018024;GO:0008270;GO:0010424;GO:0009566;GO:0070734;GO:0051567;GO:0000122;GO:0035265;GO:0018022;GO:0007286;GO:0007130	-1.98	0.0256	TRUE	-0.48	0.608	FALSE
Q4V9T8	Eif1	Eukaryotic translation initiation factor 1		Necessary for scanning and involved in initiation site selection. Promotes the assembly of 48S ribosomal complexes at the authentic initiation codon of a conventional capped mRNA (By similarity).		Acetylation; Complete proteome; Initiation factor; Phosphoprotein;Protein biosynthesis; Reference proteome.	SUI1	GO:0003743;GO:0009048	0.586	0.287	FALSE	0.52	0.384	FALSE
Q3THJ3	Eif1ad	Probable RNA-binding protein EIF1AD		Plays a role into cellular response to oxidative stress. Decreases cell proliferation (By similarity).	Nucleus (By similarity).	Complete proteome; Nucleus; Phosphoprotein; Reference proteome;RNA-binding.	eIF-1a	GO:0005634;GO:0003743	-2.45	0.0518	FALSE	1.13	0.386	FALSE
Q8BMJ3	Eif1ax	Eukaryotic translation initiation factor 1A, X-chromosomal		Seems to be required for maximal rate of protein biosynthesis. Enhances ribosome dissociation into subunits and stabilizes the binding of the initiator Met-tRNA(I) to 40 S ribosomal subunits (By similarity).		Complete proteome; Initiation factor; Protein biosynthesis;Reference proteome.	eIF-1a	GO:0003743	-0.997	0.286	FALSE	-0.902	0.372	FALSE
Q9CXU9	Eif1b	Eukaryotic translation initiation factor 1b		Probably involved in translation.		Acetylation; Complete proteome; Initiation factor; Phosphoprotein;Protein biosynthesis; Reference proteome.	SUI1	GO:0003743	-0.661	0.402	FALSE	-0.639	0.467	FALSE
Q8BJW6	Eif2a	Eukaryotic translation initiation factor 2A;Eukaryotic translation initiation factor 2A, N-terminally processed		Functions in the early steps of protein synthesis of a small number of specific mRNAs. Acts by directing the binding of methionyl-tRNAi to 40S ribosomal subunits. In contrast to the eIF- 2 complex, it binds methionyl-tRNAi to 40 S subunits in a codon- dependent manner, whereas the eIF-2 complex binds methionyl-tRNAi to 40 S subunits in a GTP-dependent manner. May act by impiging the expression of…		Acetylation; Alternative splicing; Coiled coil; Complete proteome;Initiation factor; Phosphoprotein; Protein biosynthesis;Reference proteome; Repeat; Translation regulation; WD repeat.	eIF2A	GO:0005850;GO:0043022;GO:0003743;GO:0000049;GO:0009967;GO:0006468;GO:0006417;GO:0042255;GO:0032933	-0.675	0.102	FALSE	-0.719	0.0895	FALSE
Q3UZR8	Eif2b1	Translation initiation factor eIF-2B subunit alpha		Catalyzes the exchange of eukaryotic initiation factor 2-bound GDP for GTP.		Acetylation; Complete proteome; Initiation factor;Protein biosynthesis; Reference proteome.	IF-2B	GO:0005851;GO:0005886;GO:0030234;GO:0019003;GO:0005525;GO:0005085;GO:0003743;GO:0051716;GO:0032057;GO:0014003;GO:0006446;GO:0009749;GO:0009408;GO:0043434;GO:0006413	-0.398	0.845	FALSE	-1.68	0.397	FALSE
Q99LD9	Eif2b2	Translation initiation factor eIF-2B subunit beta		Catalyzes the exchange of eukaryotic initiation factor 2-bound GDP for GTP (By similarity).		Complete proteome; Initiation factor; Protein biosynthesis;Reference proteome.	IF-2B	GO:0005851;GO:0005524;GO:0005525;GO:0005085;GO:0003743;GO:0051716;GO:0042552;GO:0014003;GO:0001541;GO:0006446;GO:0006413	-0.563	0.195	FALSE	-0.313	0.524	FALSE
B1AUN3	Eif2b3					Complete proteome; Reference proteome.	NTP_transferase	GO:0005851;GO:0005085;GO:0016779;GO:0003743;GO:0032057;GO:0014003;GO:0043087;GO:0009749;GO:0009408;GO:0043434	-0.627	0.643	FALSE	-1.68	0.209	FALSE
D3Z780	Eif2b4	Translation initiation factor eIF-2B subunit delta				Complete proteome; Reference proteome.	IF-2B	GO:0005851;GO:0005085;GO:0044237;GO:0045947	-0.698	0.246	FALSE	-0.721	0.254	FALSE
Q8CHW4	Eif2b5	Translation initiation factor eIF-2B subunit epsilon		Catalyzes the exchange of eukaryotic initiation factor 2-bound GDP for GTP (By similarity).		Complete proteome; Initiation factor; Isopeptide bond; Phosphoprotein;Protein biosynthesis; Reference proteome; Ubl conjugation.	Hexapep; W2	GO:0005851;GO:0005634;GO:0005085;GO:0003743;GO:0014002;GO:0035690;GO:0042552;GO:0032057;GO:0014003;GO:0001541;GO:0045948;GO:0043087;GO:0034976;GO:0009749;GO:0009408;GO:0043434;GO:0006413	-0.834	0.16	FALSE	-0.698	0.264	FALSE
E9PUG7	Eif2d	Eukaryotic translation initiation factor 2D				Complete proteome; Reference proteome.	SUI1	GO:0003743	-0.0477	0.955	FALSE	-0.507	0.547	FALSE
Q6ZWX6	Eif2s1	Eukaryotic translation initiation factor 2 subunit 1		Functions in the early steps of protein synthesis by forming a ternary complex with GTP and initiator tRNA. This complex binds to a 40S ribosomal subunit, followed by mRNA binding to form a 43S preinitiation complex. Junction of the 60S ribosomal subunit to form the 80S initiation complex is preceded by hydrolysis of the GTP bound to eIF-2 and release of an eIF-2-GDP binary complex. In order for …	Cytoplasmic granule. Note=The cytoplasmic granules are stress granules which are a dense aggregation in the cytosol composed of proteins and RNAs that appear when the cell is under stress. Colocalizes with NANOS3 in the stress granules.	Acetylation; Complete proteome; Initiation factor; Phosphoprotein;Protein biosynthesis; Reference proteome; RNA-binding;Translation regulation.	EIF_2_alpha; S1	GO:0010494;GO:0005850;GO:0005851;GO:0005634;GO:0043022;GO:0003743;GO:0046777;GO:0043558	-0.371	0.557	FALSE	-0.833	0.199	FALSE
Q3ULL5	Eif2s2	Eukaryotic translation initiation factor 2 subunit 2				Complete proteome; Reference proteome.		GO:0003743;GO:0001701;GO:0002176;GO:0008584;GO:0006413	0.0461	0.93	FALSE	-0.606	0.211	FALSE
Q3UIJ2	Eif2s3x	Eukaryotic translation initiation factor 2 subunit 3, X-linked				Complete proteome; GTP-binding; Nucleotide-binding;Reference proteome.	GTP_EFTU; GTP_EFTU_D2	GO:0005525;GO:0003924;GO:0006184	-0.593	0.473	FALSE	-1.31	0.125	FALSE
Q9Z0N2	Eif2s3y	Eukaryotic translation initiation factor 2 subunit 3, Y-linked		eIF-2 functions in the early steps of protein synthesis by forming a ternary complex with GTP and initiator tRNA. This complex binds to a 40S ribosomal subunit, followed by mRNA binding to form a 43S preinitiation complex. Junction of the 60S ribosomal subunit to form the 80S initiation complex is preceded by hydrolysis of the GTP bound to eIF-2 and release of an eIF-2-GDP binary complex. In orde…		Acetylation; Complete proteome; GTP-binding; Initiation factor;Nucleotide-binding; Phosphoprotein; Protein biosynthesis;Reference proteome.	eIF2_C; GTP_EFTU; GTP_EFTU_D2	GO:0005525;GO:0003924;GO:0003743;GO:0006184	0.637	0.582	FALSE	0.338	0.815	FALSE
P23116	Eif3a	Eukaryotic translation initiation factor 3 subunit A		Component of the eukaryotic translation initiation factor 3 (eIF-3) complex, which is required for several steps in the initiation of protein synthesis. The eIF-3 complex associates with the 40S ribosome and facilitates the recruitment of eIF-1, eIF-1A, eIF-2:GTP:methionyl-tRNAi and eIF-5 to form the 43S preinitiation complex (43S PIC). The eIF-3 complex stimulates mRNA recruitment to the 43S PIC…	Cytoplasm (By similarity). Cytoplasm, cytoskeleton, microtubule organizing center, centrosome. Nucleus. Note=Centrosomin-A is found in the centrosome. Centrosomin-B is found in the nucleus.	Acetylation; Coiled coil; Complete proteome; Cytoplasm; Cytoskeleton;Initiation factor; Nucleus; Phosphoprotein; Protein biosynthesis;Reference proteome; Repeat; RNA editing.	PCI	GO:0016282;GO:0033290;GO:0005852;GO:0005815;GO:0005730;GO:0003743;GO:0001732;GO:0001731;GO:0006446	-0.642	0.277	FALSE	-0.847	0.172	FALSE
Q8CIJ3	Eif3b	Eukaryotic translation initiation factor 3 subunit B		Component of the eukaryotic translation initiation factor 3 (eIF-3) complex, which is required for several steps in the initiation of protein synthesis. The eIF-3 complex associates with the 40S ribosome and facilitates the recruitment of eIF-1, eIF-1A, eIF-2:GTP:methionyl-tRNAi and eIF-5 to form the 43S preinitiation complex (43S PIC). The eIF-3 complex stimulates mRNA recruitment to the 43S PIC…	Cytoplasm (By similarity).	Acetylation; Complete proteome; Cytoplasm; Initiation factor;Phosphoprotein; Protein biosynthesis; Reference proteome; Repeat;RNA-binding; WD repeat.	eIF2A; RRM_1	GO:0016282;GO:0033290;GO:0005852;GO:0000166;GO:0003743;GO:0001731;GO:0006446;GO:0006413	-0.436	0.298	FALSE	-0.772	0.0765	FALSE
Q8R1B4	Eif3c;G730046D07Rik	Eukaryotic translation initiation factor 3 subunit C		Component of the eukaryotic translation initiation factor 3 (eIF-3) complex, which is required for several steps in the initiation of protein synthesis. The eIF-3 complex associates with the 40S ribosome and facilitates the recruitment of eIF-1, eIF-1A, eIF-2:GTP:methionyl-tRNAi and eIF-5 to form the 43S preinitiation complex (43S PIC). The eIF-3 complex stimulates mRNA recruitment to the 43S PIC…	Cytoplasm (By similarity).	Acetylation; Complete proteome; Cytoplasm; Initiation factor;Phosphoprotein; Protein biosynthesis; Reference proteome.	eIF-3c_N; PCI	GO:0016282;GO:0033290;GO:0005852;GO:0003743;GO:0001731;GO:0006446	-0.722	0.124	FALSE	-1.04	0.0371	TRUE
O70194	Eif3d	Eukaryotic translation initiation factor 3 subunit D		Component of the eukaryotic translation initiation factor 3 (eIF-3) complex, which is required for several steps in the initiation of protein synthesis. The eIF-3 complex associates with the 40S ribosome and facilitates the recruitment of eIF-1, eIF-1A, eIF-2:GTP:methionyl-tRNAi and eIF-5 to form the 43S preinitiation complex (43S PIC). The eIF-3 complex stimulates mRNA recruitment to the 43S PIC…	Cytoplasm (By similarity).	Acetylation; Complete proteome; Cytoplasm; Initiation factor;Phosphoprotein; Protein biosynthesis; Reference proteome.	eIF-3_zeta	GO:0016282;GO:0033290;GO:0005852;GO:0003743;GO:0001732;GO:0001731;GO:0006446	-0.497	0.299	FALSE	-0.73	0.145	FALSE
Q3UIG0	Eif3e	Eukaryotic translation initiation factor 3 subunit E		Required for nonsense-mediated mRNA decay (NMD); may act in conjunction with UPF2 to divert mRNAs from translation to the NMD pathway. May interact with MCM7 and EPAS1 and regulate the proteasome-mediated degradation of these proteins (By similarity). Component of the eukaryotic translation initiation factor 3 (eIF- 3) complex, which is required for several steps in the initiation of protein synt…	Cytoplasm (By similarity). Nucleus, PML body (By similarity).	Acetylation; Complete proteome; Cytoplasm; Initiation factor; Nucleus;Phosphoprotein; Protein biosynthesis; Reference proteome.	eIF3_N; PCI	GO:0016282;GO:0033290;GO:0005852;GO:0016605;GO:0003743;GO:0001731;GO:0000184;GO:0006446;GO:0006413	-1.26	0.147	FALSE	-1.68	0.0634	FALSE
Q6IRT4	Eif3f	Eukaryotic translation initiation factor 3 subunit F		Component of the eukaryotic translation initiation factor 3 (eIF-3) complex, which is required for several steps in the initiation of protein synthesis. The eIF-3 complex associates with the 40S ribosome and facilitates the recruitment of eIF-1, eIF-1A, eIF-2:GTP:methionyl-tRNAi and eIF-5 to form the 43S preinitiation complex (43S PIC). The eIF-3 complex stimulates mRNA recruitment to the 43S PIC…	Cytoplasm (By similarity).	Acetylation; Complete proteome; Cytoplasm; Hydrolase;Initiation factor; Phosphoprotein; Protease; Protein biosynthesis;Reference proteome; Thiol protease; Ubl conjugation pathway.	JAB; MitMem_reg	GO:0016282;GO:0033290;GO:0005852;GO:0008234;GO:0003743;GO:0001731;GO:0006508;GO:0006446;GO:0006413	-0.837	0.247	FALSE	-1.19	0.117	FALSE
Q544H0	Eif3g	Eukaryotic translation initiation factor 3 subunit G		Component of the eukaryotic translation initiation factor 3 (eIF-3) complex, which is required for several steps in the initiation of protein synthesis. The eIF-3 complex associates with the 40S ribosome and facilitates the recruitment of eIF-1, eIF-1A, eIF-2:GTP:methionyl-tRNAi and eIF-5 to form the 43S preinitiation complex (43S PIC). The eIF-3 complex stimulates mRNA recruitment to the 43S PIC…	Cytoplasm (By similarity). Nucleus (By similarity). Cytoplasm, perinuclear region (By similarity). Note=Colocalizes with AIFM1 in the nucleus and perinuclear region (By similarity).	Complete proteome; Cytoplasm; Initiation factor; Nucleus;Phosphoprotein; Protein biosynthesis; Reference proteome; RNA-binding.	eIF3g; RRM_1	GO:0016282;GO:0033290;GO:0005852;GO:0005634;GO:0048471;GO:0000166;GO:0003743;GO:0001731;GO:0006446;GO:0006413	-0.0186	0.97	FALSE	-0.535	0.224	FALSE
Q8BTX5	Eif3h	Eukaryotic translation initiation factor 3 subunit H		Component of the eukaryotic translation initiation factor 3 (eIF-3) complex, which is required for several steps in the initiation of protein synthesis. The eIF-3 complex associates with the 40S ribosome and facilitates the recruitment of eIF-1, eIF-1A, eIF-2:GTP:methionyl-tRNAi and eIF-5 to form the 43S preinitiation complex (43S PIC). The eIF-3 complex stimulates mRNA recruitment to the 43S PIC…	Cytoplasm (By similarity).	Complete proteome; Cytoplasm; Initiation factor; Phosphoprotein;Protein biosynthesis; Reference proteome.	JAB	GO:0016282;GO:0033290;GO:0005852;GO:0003743;GO:0001731;GO:0006413	-0.248	0.569	FALSE	-0.738	0.0952	FALSE
Q9QZD9	Eif3i	Eukaryotic translation initiation factor 3 subunit I		Component of the eukaryotic translation initiation factor 3 (eIF-3) complex, which is required for several steps in the initiation of protein synthesis. The eIF-3 complex associates with the 40S ribosome and facilitates the recruitment of eIF-1, eIF-1A, eIF-2:GTP:methionyl-tRNAi and eIF-5 to form the 43S preinitiation complex (43S PIC). The eIF-3 complex stimulates mRNA recruitment to the 43S PIC…	Cytoplasm (By similarity).	Acetylation; Complete proteome; Cytoplasm; Direct protein sequencing;Initiation factor; Isopeptide bond; Phosphoprotein;Protein biosynthesis; Reference proteome; Repeat; Ubl conjugation;WD repeat.	WD40	GO:0016282;GO:0033290;GO:0005852;GO:0003743;GO:0001731;GO:0006446;GO:0006413	-0.28	0.471	FALSE	-0.635	0.116	FALSE
Q2YDW1	Eif3j;Eif3j1;Eif3j2	Eukaryotic translation initiation factor 3 subunit J-A;Eukaryotic translation initiation factor 3 subunit J-B		Component of the eukaryotic translation initiation factor 3 (eIF-3) complex, which is required for several steps in the initiation of protein synthesis. The eIF-3 complex associates with the 40S ribosome and facilitates the recruitment of eIF-1, eIF-1A, eIF-2:GTP:methionyl-tRNAi and eIF-5 to form the 43S preinitiation complex (43S PIC). The eIF-3 complex stimulates mRNA recruitment to the 43S PIC…	Cytoplasm (By similarity).	Coiled coil; Complete proteome; Cytoplasm; Initiation factor;Phosphoprotein; Protein biosynthesis; Reference proteome.	eIF3_subunit	GO:0016282;GO:0033290;GO:0005852;GO:0003743;GO:0001731;GO:0006446	0.66	0.128	FALSE	0.155	0.773	FALSE
Q9DBZ5	Eif3k	Eukaryotic translation initiation factor 3 subunit K		Component of the eukaryotic translation initiation factor 3 (eIF-3) complex, which is required for several steps in the initiation of protein synthesis. The eIF-3 complex associates with the 40S ribosome and facilitates the recruitment of eIF-1, eIF-1A, eIF-2:GTP:methionyl-tRNAi and eIF-5 to form the 43S preinitiation complex (43S PIC). The eIF-3 complex stimulates mRNA recruitment to the 43S PIC…	Nucleus (By similarity). Cytoplasm (By similarity).	Acetylation; Alternative splicing; Complete proteome; Cytoplasm;Initiation factor; Nucleus; Phosphoprotein; Protein biosynthesis;Reference proteome.	SAC3_GANP	GO:0016282;GO:0033290;GO:0005852;GO:0005634;GO:0043022;GO:0003743;GO:0001731;GO:0006446;GO:0006413	0.00635	0.989	FALSE	-0.452	0.303	FALSE
Q8QZY1	Eif3l	Eukaryotic translation initiation factor 3 subunit L		Component of the eukaryotic translation initiation factor 3 (eIF-3) complex, which is required for several steps in the initiation of protein synthesis. The eIF-3 complex associates with the 40S ribosome and facilitates the recruitment of eIF-1, eIF-1A, eIF-2:GTP:methionyl-tRNAi and eIF-5 to form the 43S preinitiation complex (43S PIC). The eIF-3 complex stimulates mRNA recruitment to the 43S PIC…	Cytoplasm (By similarity).	Acetylation; Complete proteome; Cytoplasm; Initiation factor;Protein biosynthesis; Reference proteome.	Paf67	GO:0016282;GO:0033290;GO:0005852;GO:0001650;GO:0005654;GO:0003743;GO:0001731;GO:0006446;GO:0006413	-1.02	0.313	FALSE	-1.54	0.145	FALSE
Q99JX4	Eif3m	Eukaryotic translation initiation factor 3 subunit M		Component of the eukaryotic translation initiation factor 3 (eIF-3) complex, which is required for several steps in the initiation of protein synthesis. The eIF-3 complex associates with the 40S ribosome and facilitates the recruitment of eIF-1, eIF-1A, eIF-2:GTP:methionyl-tRNAi and eIF-5 to form the 43S preinitiation complex (43S PIC). The eIF-3 complex stimulates mRNA recruitment to the 43S PIC…	Cytoplasm (By similarity).	Acetylation; Complete proteome; Cytoplasm; Initiation factor;Phosphoprotein; Protein biosynthesis; Reference proteome.	PCI	GO:0016282;GO:0033290;GO:0005852;GO:0003743;GO:0001731;GO:0006446	-0.979	0.317	FALSE	-1.26	0.22	FALSE
Q8BTU6	Eif4a2	Eukaryotic initiation factor 4A-II;Eukaryotic initiation factor 4A-II, N-terminally processed				ATP-binding; Complete proteome; Helicase; Hydrolase;Nucleotide-binding; Reference proteome.	DEAD; Helicase_C	GO:0005524;GO:0008026;GO:0003676;GO:0006200	-0.619	0.535	FALSE	-0.862	0.421	FALSE
Q91VC3	Eif4a3;Gm8994	Eukaryotic initiation factor 4A-III;Eukaryotic initiation factor 4A-III, N-terminally processed		ATP-dependent RNA helicase. Core component of the splicing-dependent multiprotein exon junction complex (EJC) deposited at splice junctions on mRNAs. The EJC is a dynamic structure consisting of core proteins and several peripheral nuclear and cytoplasmic associated factors that join the complex only transiently either during EJC assembly or during subsequent mRNA metabolism. The EJC marks the po…	Nucleus (By similarity). Nucleus speckle (By similarity). Cytoplasm (By similarity). Note=Nucleocytoplasmic shuttling protein. Travels to the cytoplasm as part of the exon junction complex (EJC) bound to mRNA. Detected in dendritic layer as well as the nuclear and cytoplasmic (somatic) compartments of neurons. Colocalizes with STAU1 and FMR1 in dendrites (By similarity).	Acetylation; ATP-binding; Complete proteome; Cytoplasm; Helicase;Hydrolase; mRNA processing; mRNA splicing; mRNA transport;Nonsense-mediated mRNA decay; Nucleotide-binding; Nucleus;Phosphoprotein; Reference proteome; RNA-binding; rRNA processing;Spliceosome; Translation regulation; Transport.	DEAD; Helicase_C	GO:0005737;GO:0016607;GO:0005681;GO:0005524;GO:0008026;GO:0003723;GO:0006200;GO:0006397;GO:0051028;GO:0000184;GO:0000381;GO:0006417;GO:0008380;GO:0006364	-1.26	0.193	FALSE	-0.633	0.57	FALSE
Q3TDD8	Eif4b	Eukaryotic translation initiation factor 4B		Required for the binding of mRNA to ribosomes. Functions in close association with EIF4-F and EIF4-A. Binds near the 5'- terminal cap of mRNA in presence of EIF-4F and ATP. Promotes the ATPase activity and the ATP-dependent RNA unwinding activity of both EIF4-A and EIF4-F (By similarity).		Acetylation; Complete proteome; Initiation factor; Phosphoprotein;Protein biosynthesis; Reference proteome; RNA-binding.	RRM_1	GO:0000166;GO:0003743	-0.192	0.753	FALSE	-0.0962	0.902	FALSE
Q3TK95	Eif4e	Eukaryotic translation initiation factor 4E		Recognizes and binds the 7-methylguanosine-containing mRNA cap during an early step in the initiation of protein synthesis and facilitates ribosome binding by inducing the unwinding of the mRNAs secondary structures. May play an important role in spermatogenesis through translational regulation of stage- specific mRNAs during germ cell development (By similarity). Its translation stimulation acti…	Cytoplasm, P-body (By similarity).	3D-structure; Acetylation; Complete proteome; Cytoplasm;Initiation factor; Phosphoprotein; Protein biosynthesis;Reference proteome; RNA-binding; Translation regulation.	IF4E	GO:0033391;GO:0000932;GO:0010494;GO:0016281;GO:0005845;GO:0016442;GO:0003743;GO:0000082;GO:0030324;GO:0045931;GO:0006417	-0.818	0.111	FALSE	-0.562	0.301	FALSE
M0QWD1	Eif4e2	Eukaryotic translation initiation factor 4E type 2				Complete proteome; Initiation factor; Protein biosynthesis;Reference proteome; RNA-binding.	IF4E	GO:0005737;GO:0003743;GO:0001701	-1.12	0.281	FALSE	-0.358	0.787	FALSE
Q3TII9	Eif4ebp1	Eukaryotic translation initiation factor 4E-binding protein 1		Regulates eIF4E activity by preventing its assembly into the eIF4F complex: hypophosphorylated form competes with EIF4G1/EIF4G3 and strongly binds to EIF4E, leading to repress translation. Mediates the regulation of protein translation by hormones, growth factors and other stimuli that signal through the MAP kinase and mTORC1 pathways.		Acetylation; Complete proteome; Isopeptide bond; Phosphoprotein;Protein synthesis inhibitor; Reference proteome;Translation regulation; Ubl conjugation.	eIF_4EBP	GO:0005737;GO:0005634;GO:0043234;GO:0030371;GO:0000082;GO:0008286;GO:0030324;GO:0031333;GO:0045947;GO:0045931;GO:0045471;GO:0002931;GO:0031929	1.09	0.259	FALSE	0.525	0.646	FALSE
E9Q9E1	Eif4g1;eIF4GI	Eukaryotic translation initiation factor 4 gamma 1				Complete proteome; Reference proteome.	MA3; MIF4G; W2	GO:0005737;GO:0003723	-0.282	0.515	FALSE	-0.767	0.0856	FALSE
G3XA17	Eif4g2	Eukaryotic translation initiation factor 4 gamma 2				Complete proteome; Initiation factor; Protein biosynthesis;Reference proteome.	MA3; MIF4G; W2	GO:0005737;GO:0003743	-0.699	0.49	FALSE	-0.373	0.764	FALSE
Z4YKC4	Eif4g3	Eukaryotic translation initiation factor 4 gamma 3				Complete proteome; Reference proteome.	MA3; MIF4G; W2	GO:0003723;GO:0060903;GO:0001934;GO:0045727;GO:0007283	0.0493	0.971	FALSE	0.531	0.704	FALSE
Q3TG58	Eif4h;mKIAA0038	Eukaryotic translation initiation factor 4H		Stimulates the RNA helicase activity of EIF4A in the translation initiation complex. Binds weakly mRNA (By similarity).	Cytoplasm, perinuclear region.	3D-structure; Acetylation; Alternative splicing; Complete proteome;Cytoplasm; Direct protein sequencing; Initiation factor;Phosphoprotein; Protein biosynthesis; Reference proteome; RNA-binding.	RRM_1	GO:0048471;GO:0000166;GO:0003743;GO:0048589;GO:0019953	0.402	0.557	FALSE	1.12	0.109	FALSE
Q3TQR3	Eif5	Eukaryotic translation initiation factor 5		Catalyzes the hydrolysis of GTP bound to the 40S ribosomal initiation complex (40S.mRNA.Met-tRNA[F].eIF-2.GTP) with the subsequent joining of a 60S ribosomal subunit resulting in the release of eIF-2 and the guanine nucleotide. The subsequent joining of a 60S ribosomal subunit results in the formation of a functional 80S initiation complex (80S.mRNA.Met-tRNA[F]).		Complete proteome; GTP-binding; Initiation factor; Nucleotide-binding;Phosphoprotein; Protein biosynthesis; Reference proteome.	eIF-5_eIF-2B; W2	GO:0005737;GO:0005525;GO:0003743	-0.548	0.171	FALSE	-0.675	0.105	FALSE
P63242	Eif5a;Eif5a2	Eukaryotic translation initiation factor 5A-1;Eukaryotic translation initiation factor 5A;Eukaryotic translation initiation factor 5A-2		mRNA-binding protein involved in translation elongation. Has an important function at the level of mRNA turnover, probably acting downstream of decapping. Involved in actin dynamics and cell cycle progression, mRNA decay and probably in a pathway involved in stress response and maintenance of cell wall integrity. With syntenin SDCBP, functions as a regulator of p53/TP53 and p53/TP53-dependent apo…	Cytoplasm. Nucleus. Endoplasmic reticulum membrane; Peripheral membrane protein; Cytoplasmic side (By similarity). Nucleus, nuclear pore complex (By similarity). Note=The N-terminal extension contributes in signaling this protein to nuclear localization.	Acetylation; Complete proteome; Cytoplasm; Direct protein sequencing;Elongation factor; Endoplasmic reticulum; Hypusine; Membrane;mRNA transport; Nuclear pore complex; Nucleus; Protein biosynthesis;Protein transport; Reference proteome; RNA-binding; Translocation;Transport.	eIF-5a	GO:0005737;GO:0030425;GO:0005789;GO:0043025;GO:0005643;GO:0005634;GO:0043022;GO:0003746;GO:0007568;GO:0051028;GO:0043066;GO:0008612;GO:0043065;GO:0051149;GO:0045901;GO:0045905;GO:0015031;GO:0006452	0.395	0.499	FALSE	0.401	0.547	FALSE
Q05D44	Eif5b	Eukaryotic translation initiation factor 5B		Function in general translation initiation by promoting the binding of the formylmethionine-tRNA to ribosomes. Seems to function along with eIF-2 (By similarity).	Cytoplasm.	Complete proteome; Cytoplasm; GTP-binding; Initiation factor;Nucleotide-binding; Phosphoprotein; Protein biosynthesis;Reference proteome.	GTP_EFTU; GTP_EFTU_D2; IF-2	GO:0005737;GO:0005525;GO:0003924;GO:0003743;GO:0006184	-0.4	0.427	FALSE	-0.123	0.858	FALSE
Q545K4	Eif6	Eukaryotic translation initiation factor 6				Complete proteome; Reference proteome.	eIF-6	GO:0005638;GO:0043022;GO:0042256	-0.0525	0.93	FALSE	0.038	0.962	FALSE
B1ATP7	Elac2	Zinc phosphodiesterase ELAC protein 2				Complete proteome; Reference proteome.	Lactamase_B_4	GO:0005739;GO:0016787;GO:0008033	-0.678	0.147	FALSE	-0.612	0.209	FALSE
Q8BM84	Elavl1	ELAV-like protein;ELAV-like protein 1		RNA-binding protein that binds to the 3'-UTR region of mRNAs and increases their stability. Involved in embryonic stem cells (ESCs) differentiation: preferentially binds mRNAs that are not methylated by N6-methyladenosine (m6A), stabilizing them, promoting ESCs differentiation. Binds to poly-U elements and AU- rich elements (AREs) in the 3'-UTR of target mRNAs. Binds avidly to the AU-rich element…	Cytoplasm (By similarity). Nucleus (By similarity). Note=Translocates into the cytoplasm following phosphorylation by MAPKAPK2 (By similarity).	Acetylation; Complete proteome; Cytoplasm; Methylation; Nucleus;Phosphoprotein; Reference proteome; Repeat; RNA-binding.	RRM_1	GO:0005737;GO:0005634;GO:0003725;GO:0035925;GO:0000166;GO:0070935;GO:0045727	-0.271	0.464	FALSE	-0.893	0.0258	FALSE
Q571D6	Elmo1;Elmo2	Engulfment and cell motility protein 1;Engulfment and cell motility protein 2		Involved in cytoskeletal rearrangements required for phagocytosis of apoptotic cells and cell motility. Acts in assocation with DOCK1 and CRK. Was initially proposed to be required in complex with DOCK1 to activate Rac Rho small GTPases. May enhance the guanine nucleotide exchange factor (GEF) activity of DOCK1 (By similarity).	Cytoplasm (By similarity). Cell membrane (By similarity). Note=Translocation to plasma membrane seems to be mediated by DOCK1 and CRK (By similarity).	Acetylation; Alternative splicing; Apoptosis; Cell membrane;Complete proteome; Cytoplasm; Membrane; Phagocytosis; Phosphoprotein;Reference proteome; SH3-binding.	DUF3361; ELMO_CED12	GO:0005737;GO:0005856;GO:0005886;GO:0030036;GO:0006915;GO:0006928;GO:0006911;GO:0016601	-0.878	0.141	FALSE	-1.04	0.0929	FALSE
Q91WG4	Elp2	Elongator complex protein 2	Yes	Regulates the ligand-dependent activation of STAT3.	Cytoplasm. Nucleus (By similarity).	Alternative splicing; Complete proteome; Cytoplasm; Nucleus;Reference proteome; Repeat; Transcription; Transcription regulation;WD repeat.	WD40	GO:0005737;GO:0033588;GO:0000502;GO:0008023;GO:0003677;GO:0061133;GO:0019901;GO:0043248;GO:0046425;GO:0006355;GO:0006368	-0.841	0.604	FALSE	-2.13	0.192	FALSE
Q9CZX0	Elp3	Elongator complex protein 3		Catalytic histone acetyltransferase subunit of the RNA polymerase II elongator complex, which is a component of the RNA polymerase II (Pol II) holoenzyme and is involved in transcriptional elongation. Elongator may play a role in chromatin remodeling and is involved in acetylation of histones H3 and probably H4. May also have a methyltransferase activity. Involved in cell migration.	Cytoplasm (By similarity). Nucleus (By similarity).	Acyltransferase; Alternative splicing; Complete proteome; Cytoplasm;Iron; Iron-sulfur; Metal-binding; Nucleus; Reference proteome;S-adenosyl-L-methionine; Transcription; Transcription regulation;Transferase.	Acetyltransf_1; Radical_SAM	GO:0005737;GO:0016591;GO:0033588;GO:0005730;GO:0008023;GO:0003677;GO:0004402;GO:0051536;GO:0046872;GO:0008607;GO:0016573;GO:0030335;GO:0006357;GO:0006368	-0.286	0.849	FALSE	-0.224	0.909	FALSE
Q9ER73	Elp4	Elongator complex protein 4		Acts as subunit of the RNA polymerase II elongator complex, which is a histone acetyltransferase component of the RNA polymerase II (Pol II) holoenzyme and is involved in transcriptional elongation. Elongator may play a role in chromatin remodeling and is involved in acetylation of histones H3 and probably H4 (By similarity).	Cytoplasm (By similarity). Nucleus (By similarity).	Complete proteome; Cytoplasm; Nucleus; Reference proteome;Transcription; Transcription regulation.	PAXNEB	GO:0005737;GO:0016591;GO:0033588;GO:0008023;GO:0004402;GO:0008607;GO:0006357;GO:0006351	-2.15	0.359	FALSE	-2.4	0.346	FALSE
Q3UFK0	Emb	Embigin		Plays a role in targeting the monocarboxylate transporters SLC16A1 and SLC16A7 to the cell membrane (By similarity).	Cell membrane; Single-pass type I membrane protein (By similarity).	Cell membrane; Complete proteome; Disulfide bond; Glycoprotein;Immunoglobulin domain; Membrane; Reference proteome; Repeat; Signal;Transmembrane; Transmembrane helix.	I-set	GO:0005887;GO:0097159;GO:0007155;GO:0035879	-2.68	0.182	FALSE	-4.41	0.0397	TRUE
Q8C988	Emc8;Gm27021	ER membrane protein complex subunit 8				Complete proteome; Reference proteome.	UPF0172	GO:0005739	-0.981	0.206	FALSE	0.196	0.853	FALSE
I7HJS1	Emd	Emerin				Complete proteome; Reference proteome.	LEM	GO:0005637;GO:0005652;GO:0035914	1.61	0.0698	FALSE	1.48	0.1	FALSE
[truncated: 2,148 more rows]
